# Supplementary material for: A Transcription Factor Functional Atlas of Germline Development
Source: Research Square preprint supplement (doi:10.21203/rs.3.rs-3880498/v1), 2024-01-26
Supplement: Supplementary file 1 [file 00ad159ca53ebdd7a2135ed9.xlsx]

## Sheet: Sheet1
Oligos used for RNAi plasmid cloning
Gene	Sequence
K09H9.7	aaaaAAGCTTtggcagttacatcctatacc
	ttttAAGCTTTCAGTCTCGCTTTCTCGC
cey-3	aaaaTCTAGAGTCGATGGTAAGAATGGACC
	ttttAGATCTTGAGCATCAATCAACTGAGC
hmg-3	aaaaAAGCTTATCTGGTTCAATGCCAATCG
	ttttAAGCTTCCGATTCACCAGAAGACTCG
nfya-2	aaaaAAGCTTgttagtcctcctttaacagc
	ttttAAGCTTatacCTGATCATCGCATAGG
ztf-23	aaaaAAGCTTATCCAATCGTATTCCGATGC
	ttttAAGCTTctaacATCATATTGGCTACC
nfyc-1	aaaaAAGCTTTCATGGAACATCCCTACACG
	ttttAAGCTTTGAAGAATTCGTCGCCTTGC
Y57A10A.31	aaaaAAGCTTcaaaaaatcgatgaaaatcgc
	ttttAAGCTTGACATCTCAAAAGTCTCTCG
Y53F4B.3	aaaaAAGCTTGCCTGGCGAAAGAAAACC
	ttttAAGCTTttccaccaacCAATGTCC
xnd-1	aaaaAAGCTTCACAGCGATCTCTGATATCC
	ttttAAGCTTTTCGAGTAGAACGTCATAGG
hmg-4	aaaaAAGCTTGAGAAGAGGGAAAAGAAGG
	ttttAAGCTTCTTCGGCTCCTCATCGTCC
R05D3.3	aaaaAAGCTTCTCTGTGACGTTGAGTTCG
	ttttAAGCTTCTAGTCACACATTCTTCAGC
ztf-1	aaaaAAGCTTGTGAGAAGATTGGACTATCC
	ttttAAGCTTatctggctatattttgcacg
Y56A3A.28	aaaaAAGCTTcgctccaatgagaatttgcg
	ttttAAGCTTggccaataagggttttaaagc
zip-11	aaaaAAGCTTattgtcgtgcaagtacgc
	ttttAAGCTTCATTCTTTCGAGATTTCCTCG
zim-2	aaaaAAGCTTcctaacgattccaatcaccg
	ttttAAGCTTGGAAATGCAAATGAAACTCG
zim-3	aaaaAAGCTTAAgtaagttccgatctgagc
	ttttAAGCTTAAAGATCGTGTGATGGTCC
rbr-2	aaaaAAGCTTGTCAAGAGAACAGTATCTCG
	ttttAAGCTTGCTTCTTTGTCGATAGCAAA
repo-1	aaaaAAGCTTAAGGAAAGAAGCATCAAGC
	ttttAAGCTTAATAGTACGGCTGATCATCG
C04F5.9	aaaaAAGCTTtcgattgatcactatatggc
	ttttAAGCTTCCACAACCTTCATTAATTCC
nhr-47	aaaaAAGCTTGCCATGGTAACTAATCATGC
	ttttAAGCTTgaacccacTTTGCACTTGG
attf-5	aaaaAAGCTTGCTTCGGAAACTCCACG
	ttttAAGCTTcCTTATCTTGTTCCCTATCC
daf-3	aaaaAAGCTTCACACACCGATGATGTCACC
	ttttAAGCTTGCCATCAAGTGTCCTTGG
egrh-1	aaaaAAGCTTCCAGAATTAGTTGTGGACTC
	ttttAAGCTTcttgtacctattcaacttacG
zim-1	aaaaAAGCTTACAAATCGTACAATTGGCG
	ttttAAGCTTAAATGGCTTCACATCCTCG
C06A6.2	aaaaAAGCTTCGTCTAGCAATTGCATCTCC
	ttttAAGCTTCGTTGAGGAATCGATGAGC
nhr-32	aaaaAAGCTTCCGAGCTTGCAGATTAGC
	ttttAAGCTTGTCGTGAAGTCTTCTGACG
ceh-83	aaaaAAGCTTccttatccttaggcttatgc
	ttttAAGCTTTTGTAGAGCAACACGTGC
bed-1	aaaaAAGCTTGGAACATCAGCACTATTACG
	ttttAAGCTTttgtacCTCCTCATCCTGC
saeg-1	aaaaAAGCTTCAAGTATCCACAAGTGAACG
	ttttAAGCTTACTCCATGTGACCATTTCC
znf-236	aaaaAAGCTTCTCAACCTGAACACTGTCCG
	ttttAAGCTTaatcagttgagaactctgcg
mex-6	aaaaAAGCTTCAGCAACATCCAATAGTGC
	ttttAAGCTTCATTTGACCCAATGGTTGC
efl-1	aaaaAAGCTTATGGAAGACTCGTACAACG
	ttttAAGCTTaaatacgattttccgccg
bed-3	aaaaAAGCTTGAGATATTCTACATCGTCCG
	ttttAAGCTTaaattctcgcctcactcg
eor-1	aaaaAAGCTTGTACTCTCCGAATCCCAACG
	ttttAAGCTTATTCCACGGATTCCATGC
ceh-44	aaaaAAGCTTtaaattccgcctatttcagc
	ttttAAGCTTgtcccttccaaaattccg
Y73E7A.1	aaaaAAGCTTccagaacttcgtgttttgaa
	ttttAAGCTTagatttcggtactccacc
znf-598	aaaaAAGCTTCTGACGAAGCTGTCGATGG
	ttttAAGCTTAGCGACATACTGGACACG
F52B5.7	aaaaAAGCTTgacgtcatactggaatggc
	ttttAAGCTTGGTGTTGATGTCATGGATG
cey-4	aaaaAAGCTTCGAGAATGAGGACTTCTTCG
	ttttAAGCTTcaataaaagcagatgataccg
nfi-1	aaaaaagcttGTGAGTCCGAAAGCCAATGG
	ttttaagcttCGCCGCATTTTCCCTTTCTG
elt-1	aaaaaagcttacgcgataaacggattcatcg
	ttttaagcttGTCGGTGTCATGAGCATTGG
Y5F2A.4	aaaaaagcttCGACACAAATGTCAAGACTGC
	ttttaagcttCCGTAAACCATCACTTCCTGC
dpl-1	aaaaaagcttAGAGTCACAATGAACCTGTGG
	ttttaagcttGGAAGATGAAGTACAGTGTCG
hlh-2	aaaaaagcttCTGCATCAAGAGCAACGAGC
	ttttaagcttGATGGTGCATTGTCATCAAGC
ceh-38	aaaaaagcttCGCGTCGACGAAACACTGAT
	ttttaagcttGACTTCCATCGAGATCTTCC
fkh-4	aaaaaagcttGGAGGTTGCCATCAAGATCG
	ttttaagcttttcaatgaggcaacacgcgg
ceh-93	aaaaaagcttTTGGAGGAGCCTGAGAATgc
	ttttaagctttccacagctagtgtgacagg
fkh-9	aaaaaagcttctagtttggtgtgcattgggg
	ttttaagcttTGGAGAAAGTGACGGACTGG
cep-1	aaaaaagcttATGATGCACAGAACTCCACC
	ttttaagcttTTTCATCGCTTCCTGGATGC
Oligos used for genotyping
Allele	Sequence
mkcSi13 [sun-1p::rde-1]	Forward, ctgaatatccatggcacatgc
	Reverse, ggtgactttagaactggtcg
mkcSi13 [sun-1p::rde-1]	Forward, gacgcgatcttgagaattgc
	Reverse, TGCCAGAAGAGTTTTGCACG
rde-1(mkc36)	Forward, CTGGTAAATACTGGTACTGG
	Reverse, AACTCCGATTCGCTTCTTCG
rde-1(mkc36)	Forward, TATCGTCATTCTCTCGATCC
	Reverse, CTGTCTGCTTCTTCTCATGC
lst-1(am302[3xFLAG::lst-1])	Forward, agctcttgcattcttgctcc
	Reverse, GTAGGCGATGGTACTACTGC
sygl-1(am307[3xFLAG::sygl-1])	Forward, gcataacttccatggagttag
	Reverse, CCTTGATCTCCAAGTGTTGC
ced-3(rp190)	Forward, TTCTCGAAGTTCTCATCGC
	Reverse, gccaaccgtgtaatactcg
ced-3(rp190)	Forward, TTCTCGAAGTTCTCATCGC
	Reverse, TCGAATTCGACAGCATTCG
crRNA for ced-3 deletion CRISPR
crRNA #1	/AlTR1/rCrUrCrGrArCrArCrArCrGrCrArArArGrGrArUrArGrUrUrUrUrArGrArGrCrUrArUrGrCrU/AlTR2/
crRNA #2	/AlTR1/rGrUrGrArArArGrCrArGrUrGrCrArArCrGrArCrGrGrUrUrUrUrArGrArGrCrUrArUrGrCrU/AlTR2/
