# Supplementary material for: A Transcription Factor Functional Atlas of Germline Development
Source: Research Square preprint supplement (doi:10.21203/rs.3.rs-3880498/v1), 2024-01-26
Supplement: Supplementary file 2 [file 09c2e2897c6236d774fddae0.xlsx]

## Sheet: Sheet1
External strains and strains generated outside this project
Strain	Genotype	Source
N2	Wild-type, Bristol strain	Caenorhabditis Genetics Centre (CGC), University of Minnesota
DCL569	mkcSi13 [sun-1p::rde-1::sun-1 3'UTR + unc-119(+)] II; rde-1(mkc36) V	CGC
GC833	glp-1(ar202) III	CGC
OD95	ltIs37 [(pAA64) pie-1p::mCherry::his-58 + unc-119(+)] IV; ltIs38 [pie-1p::GFP::PH(PLC1delta1) + unc-119(+)]; unc-119(ed3) III	CGC
WU1756	lst-1(am302[3xFLAG::lst-1]) I	CGC
WU1770	sygl-1(am307[3xFLAG::sygl-1]) I	CGC
Strains generated in this project
Strain	Genotype	Source
RJP5037	sygl-1(am307[3xFLAG::sygl-1]) I; mkcSi13 [sun-1p::rde-1::sun-1 3'UTR + unc-119(+)] II; rde-1(mkc36) V	This study
RJP5141	lst-1(am302[3xFLAG::lst-1]) I; mkcSi13 [sun-1p::rde-1::sun-1 3'UTR + unc-119(+)] II; rde-1(mkc36) V	This study
RJP5442	ltIs37 [(pAA64) pie-1p::mCherry::his-58 + unc-119(+)] IV; ltIs38 [pie-1p::GFP::PH(PLC1delta1) + unc-119(+)]; unc-119(ed3) III; mkcSi13 [sun-1p::rde-1::sun-1 3'UTR + unc-119(+)] II; rde-1(mkc36) V	This study
RJP5443	ltIs37 [(pAA64) pie-1p::mCherry::his-58 + unc-119(+)] IV; mkcSi13 [sun-1p::rde-1::sun-1 3'UTR + unc-119(+)] II; rde-1(mkc36) V	This study
RJP5816	rp190(ced-3 null) IV; ltIs37 [(pAA64) pie-1p::mCherry::his-58 + unc-119(+)] IV; ltIs38 [pie-1p::GFP::PH(PLC1delta1) + unc-119(+)]; unc-119(ed3) III; mkcSi13 [sun-1p::rde-1::sun-1 3'UTR + unc-119(+)] II; rde-1(mkc36) V	This study
RJP5890	glp-1(ar202) III; mkcSi13 [sun-1p::rde-1::sun-1 3'UTR + unc-119(+)] II; rde-1(mkc36) V	This study
RJP5443	unc-119(ed3) III;ltIs37 [(pAA64) pie-1p::mCherry::his-58 + unc-119(+)] IV; mkcSi13 II; ; rde-1(mkc36) V	This study
