# Supplementary material for: A Transcription Factor Functional Atlas of Germline Development
Source: Research Square preprint supplement (doi:10.21203/rs.3.rs-3880498/v1), 2024-01-26
Supplement: Supplementary file 3 [file 1c7ea218f5062d3a2a4fc865.xlsx]

## Sheet: Legend of phenotypic analysis
Phenotype	Data presented	Color code
Small germline	The number of germ lines present this phenoype.	2-3	4-5	6-8
Rachis	The number indicates the number of germ lines have narrow or wide rachis, and minus (-) indicates narrow.	2-3	4-5	6-8
Abnormal meiotic progression	The number of germ lines present this phenoype.	2-3	4-5	6-8
Incomplete spermatogenesis (no. germlines)	The number of germ lines present this phenoype.	2-3	4-5	6-8
Multinucleated germ lines	The number of germ lines present multinucleated cells.Data presented is deducted the number of germ lines present multinucleated cells in the respective control.	2-3	4-5	6-8
Multinucleated cells	The total number of multinucleated cells in eight germ lines analysed, presented as number of cells x type of cases. Type of cases include binucleated cells (bi), trinucleated cells(tri), and quadnucleated cells (quad). Data presented is deducted the number of multinucleated cells present in the respective control.	3-5xbi	6-8xbi	>=9xbi
Apoptosis	The number of germ lines have >=5 apoptotic cells.	2-3	4-5	6-8
Changes in single array oocyte, % of control	The average number of single array oocytes presented as difference to control (%), only statistic significant data are shown.	20-35	36-50	>50
Changes in budded oocyte, % of control	The average number of budded oocytes presented as difference to control (%), only statistic significant data are shown.	20-35	36-50	x>50
Delayed/No expansion at turn	The number of germ lines present this phenotype.	2-3	4-5	6-8
Vesiculation	The number of germ lines present this phenoype. Data presented is deducted the number of germ lines present this phenotype in the respective control.	2-3	4-5	6-8
Mislocated sperm	The number of germ lines present this phenoype. Data presented is deducted the number of germ lines present this phenotype in the respective control.	2-3	4-5	6-8

## Sheet: Results of all TFs
WormBase Gene ID	Sequence Name	Gene.Public.Name	Small germline	Rachis	Abnormal meiotic progression	Incomplete spermatogenesis	Multinucleated germ lines	Multinucleated cells	Apoptosis	Changes in single array oocyte, % of control	Changes in budded oocyte, % of control	Delayed/No expansion at turn	Vesiculation	Mislocated sperm	Other phenotypes
WBGene00003012	F18A1.2	lin-26	0	0	0	0	7	14xbi	0			1	2	0
WBGene00016364	C33G8.7	nhr-161	0	0	0	0	5	9xbi	1			2	1	0
WBGene00007242	C01G12.1	madf-5	1	-1	0	2	4	6xbi	0			2	3	0	1/8 defective small germline with no visible sperm and oocytes
WBGene00019521	K08B12.2	dmd-7	0	0	0	0	4	10xbi	1			2	0	0
WBGene00003630	T03G6.2	nhr-40	0	0	0	0	4	7xbi	0	38		0	0	0
WBGene00008999	F21A10.2	F21A10.2	0	1	0	0	4	4xbi, 1xtri	0			0	0	2
WBGene00018420	F44E2.7	F44E2.7	0	0	0	0	4	4xbi	0			0	1	0
WBGene00012005	T24H10.7	jun-1	0	0	0	0	4	6xbi	0			0	0	1
WBGene00003704	Y45G5AM.1	nhr-114	0	0	0	0	4	9xbi	0			0	0	0
WBGene00000461	F17A2.5	ceh-40	0	0	0	2	2	2xbi	0	-20		0	0	4
WBGene00013966	ZK287.6	ztf-9	0	0	0	0	2	8xbi, 1xtri	2		61	0	3	0
WBGene00018317	F41H10.4	F41H10.4	0	0	0	0	2	4xbi, 2xtri	0		57	0	0	0
WBGene00001435	C29F7.4	fkh-3	0	1	0	0	2	2xbi	0			0	5	0
WBGene00004203	Y113G7B.23	swsn-1	0	-2	1	6	1	1xbi	0			0	1	0
WBGene00020930	W02C12.3	hlh-30	0	-4	0	0	1	1xbi	0			0	1	0	1/8 abrupt oocyte expansion
WBGene00015352	C02F5.12	C02F5.12	0	0	0	2	1	3xbi, 1xtri	0	52		0	2	0
WBGene00044651	Y94H6A.11	egrh-3	0	0	1	0	1	9xbi	2		50	0	1	0
WBGene00004862	T05A10.1	sma-9	0	0	1	0	1	3xbi	0			0	6	1
WBGene00001874	T09E8.2	him-17	1	0	0	0	1	1xbi	5	-44		0	1	0
WBGene00009923	F52B5.7	F52B5.7	0	0	0	0	1	1xbi	0		100	2	0	0
WBGene00006827	F08C6.7	unc-98	0	0	1	0	1	1xbi	0	65		0	4	0
WBGene00044508	C18F3.4	nsy-7	0	0	0	0	1	1xbi	0	57		0	0	1
WBGene00011066	R06C7.9	ztf-15	0	0	0	0	1	2xbi	0		53	0	0	1
WBGene00019864	R04A9.5	ceh-93	0	0	0	0	1	1xbi	0			0	2	4
WBGene00008118	C46F11.3	C46F11.3	0	0	0	0	1	1xbi	0			0	5	0
WBGene00006943	B0336.1	wrm-1	0	0	0	0	1	1xbi, 1xtri	0			0	4	0
WBGene00001973	C32F10.5	hmg-3	4	-5	4	0	0	0	1			0	0	3	2/8 abrupt expansion
WBGene00002169	F37A4.8	isw-1	6	-7	0	0	0	0	1	-36	-70	0	0	1	6/8 abrupt oocyte expansion
WBGene00009937	F52F12.4	lsl-1	1	-2	0	6	0	0	1	-51		0	0	0
WBGene00000459	F22D3.1	ceh-38	0	-2	0	0	0	0	0			0	0	5
WBGene00013350	Y59A8B.13	slr-2	0	0	4	0	0	0	0			0	3	0
WBGene00019629	K10D2.3	cid-1	0	0	2	0	0	0	0			0	4	0
WBGene00009009	F21D5.4	F21D5.4	0	-1	0	2	0	0	0		90	1	0	1
WBGene00002717	C01G8.9	let-526	0	0	0	0	0	0	1		50	0	2	0
WBGene00016890	C52E12.6	lst-5	0	0	1	0	0	0	0			0	5	0
WBGene00003024	C07H6.7	lin-39	0	0	1	0	0	0	1			0	6	0
WBGene00003037	JC8.6	lin-54	0	0	0	0	0	0	0			0	5	0
WBGene00021387	Y37F4.6	Y37F4.6	0	0	0	0	0	0	0			1	4	1
WBGene00009461	F36D1.1	F36D1.1	0	0	0	0	0	0	0			4	0	0
WBGene00013150	Y53F4B.3	Y53F4B.3	0	0	0	0	0	0	0			4	0	0
WBGene00013425	Y66A7A.5	Y66A7A.5	0	0	0	1	0	0	0			4	0	0
WBGene00003600	R09G11.2	nhr-1	0	0	0	0	0	0	0	69		0	3	0
WBGene00003624	C11G6.4	nhr-28	0	0	1	1	0	0	0	53		0	3	0
WBGene00009772	F46B6.7	ztf-7	0	0	0	0	0	0	0	41		0	0	4
WBGene00001971	Y48B6A.14	hmg-1.1	0	0	0	0	0	0	0		77	0	2	0
WBGene00001061	T23G7.1	dpl-1	0	0	0	1	0	0	0		67	0	1	3
WBGene00018833	F54F2.5	ztf-1	0	0	0	0	0	0	0	38	58	0	0	2
WBGene00020399	T10B11.3	ztf-4	0	0	0	0	0	0	0		60	0	0	0
WBGene00011639	T09A5.12	ztf-17	0	0	1	0	0	0	0			1	4	0
WBGene00022805	ZK697.2	nhr-256	0	0	0	0	0	0	0			1	6	0
WBGene00013734	Y111B2A.10	Y111B2A.10	5	-5	3	5	0	0	1			0	0	0	2/8 spermatogenic germline + 1/8 small and defective germline + 1/8 all chromatin material is outside germline
WBGene00022762	ZK546.5	ZK546.5	1	-6	0	7	0	0	0			0	0	0	2/8 spermatogenic germline
Genes above are shown in Figure 1C
WBGene00013878	ZC376.7	atfs-1													8/8 severely underdeveloped germline
WBGene00015091	B0261.1	vep-1													8/8 defective small germ line with no sperm or oocytes
WBGene00015809	C16A3.4	znf-622													8/8 small germlines with no sperm and oocytes(8)
WBGene00008386	D1081.8	cdc-5L													8/8 severely underdeveloped germ lines with only a few germ cells with no sperm or oocytes
WBGene00017605	F19F10.9	F19F10.9													8/8 small germline (5 with no sperm or oocytes, 3 spermatogenic germlines), 8/8 vesiculation
WBGene00009084	F23B12.7	F23B12.7													4/8 spermatogenic germline, 4/8 small germline with no sperm or oocyte
WBGene00009365	F33H1.4	F33H1.4													3/8 small spermatogenic germline + 5/8 small germline (can't see features)
WBGene00002245	K08B4.1	lag-1													8/8 underdeveloped germ lines
WBGene00008683	F11A10.2	repo-1													5/8 spermatogenic germline + 3/8 small germline with unfinished spermatogenesis and fewer oocytes
WBGene00001568	F32H2.1	snpc-4													8/8 small and defective germlines with no sperm and oocytes
WBGene00006542	T20B12.2	tbp-1													8/8 underdeveloped severely defective germ line
WBGene00012243	W04D2.4	W04D2.4													6/8 small defective germline with sperm but no oocytes
WBGene00012474	Y18D10A.1	Y18D10A.1													4/8 spermatogenic germ line
WBGene00013236	Y56A3A.18	znf-593													6/8spermatogenic germline with no oocytes+1/8small germline with no sperm or oocytes
WBGene00010264	F58G1.2	F58G1.2													8/8 small or no germ lines observed.
WBGene00013676	Y105E8A.17	ekl-4													4/8 spermatogenic germline
RNAi of the 18 genes above (in bold) caused sterility.
WBGene00011597	T07G12.6	zim-1	0	-1	2	0	3	6xbi	3			0	0	0
WBGene00010771	K11D2.5	K11D2.5	0	0	0	2	3	11xbi, 1xtri	0			0	2	0
WBGene00045255	Y41D4B.27	nhr-146	0	0	0	0	3	7xbi	0			2	0	0
WBGene00003651	W01D2.2	nhr-61	0	0	0	0	3	6xbi	1			2	0	0
WBGene00020763	T24C4.7	ztf-18	0	0	0	0	3	4xbi	0	22		0	0	1
WBGene00020214	T04G9.1	attf-5	0	-1	1	0	3	3xbi	0	41		0	0	0
WBGene00003622	C01H6.5	nhr-23	0	0	1	1	3	6xbi	1	30		0	0	0
WBGene00006796	T28F12.2	unc-62	0	0	0	0	3	13xbi	1		-24	1	2	0
WBGene00012436	Y11D7A.13	flh-3	0	0	0	0	3	3xbi	0		25	0	1	2
WBGene00001470	ZK783.4	flt-1/baz-2	0	0	0	0	3	9xbi, 1xquad	0			0	2	2
WBGene00010868	M04G12.4	somi-1	0	0	0	0	3	5xbi	0			0	2	0
WBGene00016138	C26E6.2	flh-2	0	0	0	0	3	7xbi	0			1	0	0
WBGene00001949	M05B5.5	hlh-2	0	0	0	0	3	3xbi	0			0	0	1
WBGene00019651	K11D12.12	K11D12.12	0	0	0	0	3	5xbi	0			0	1	0
WBGene00003592	ZK1290.4	nfi-1	0	0	0	0	3	8xbi	0			0	0	0
WBGene00019327	K02F3.4	zip-2	0	0	0	0	3	4xbi	0			0	0	1
WBGene00016888	C52E12.1	ZNF-598	0	0	0	0	3	6xbi	0			0	0	0
WBGene00001436	C29F7.5	fkh-4	2	0	0	1	2	3xbi	0			0	1	1
WBGene00017687	F22A3.1	ets-4	0	-2	0	1	2	2xbi	0			0	0	3
WBGene00003660	Y51A2D.17	nhr-70	0	0	2	1	2	2xbi	0			0	1	0
WBGene00016269	C30G4.4	C30G4.4	0	0	1	0	2	8xbi	3			0	1	0
WBGene00020630	T20F7.1	T20F7.1	0	0	0	0	2	4xbi	0			0	3	1
WBGene00021538	Y42H9AR.3	rabs-5	0	0	1	1	2	5xbi	0			0	0	1
WBGene00019598	K09H9.7	K09H9.7	0	-1	0	0	2	3xbi	0	44		0	0	0
WBGene00013178	Y53H1A.2	Y53H1A.2	0	0	0	0	2	3xbi	0			0	2	0
WBGene00007053	T04D1.4	chd-7	0	0	0	0	2	14xbi	0			0	0	0
WBGene00006543	F21H11.3	tbx-2	0	-1	0	0	2	4xbi	0			0	0	0
WBGene00011964	T23G5.6	T23G5.6	0	0	0	0	2	6xbi	0			0	2	2
WBGene00003210	C38D4.3	mel-28	0	0	1	0	2	6xbi	1			1	3	0
WBGene00003163	R03E9.1	mdl-1	0	0	1	0	2	5xbi	0			0	0	0
WBGene00012943	Y47D3B.9	bed-2	0	0	0	0	2	3xbi	0			0	1	0
WBGene00000444	T26C11.6	ceh-21	0	0	0	0	2	4xbi	0			0	0	0
WBGene00043056	Y53H1A.5	nfya-2	0	0	0	0	2	4xbi	0			1	0	0
WBGene00007042	C26C6.1	pbrm-1	0	0	1	0	2	11xbi	0			1	0	0
WBGene00004319	ZK593.4	rbr-2	0	0	1	0	2	3xbi	0			0	0	0
WBGene00004751	K10G6.3	sea-2	0	0	0	0	2	3xbi	1			0	1	0
WBGene00005009	C09H6.1	spr-4	0	1	0	0	2	4xbi	0			0	0	0
WBGene00004786	F44A6.2	sex-1	0	0	0	0	2	2xbi	2			2	0	1
WBGene00000221	T04C10.4	atf-4	0	0	0	1	2	3xbi	0			1	0	2
WBGene00001086	R13G10.1	dpy-27	0	0	0	0	2	1xbi, 1xtri	0			0	0	2
WBGene00003636	C45E5.6	nhr-46	0	-1	0	1	2	2xbi	0			0	0	3
WBGene00001161	Y102A5C.18	efl-1	0	0	0	0	2	2xbi	0			1	0	0
WBGene00001955	F58A4.7	hlh-11	0	0	0	0	2	2xbi	0			0	0	0
WBGene00007048	C16A3.7	nfx-1	0	0	0	0	2	2xbi	0			1	0	0
WBGene00021846	Y54E10BR.8	ztf-23	0	0	0	2	1	2xbi	0		-31	0	0	0
WBGene00009133	F25H8.6	bed-3	0	0	0	2	1	1xbi	0			1	3	1
WBGene00003148	H21P03.1	mbf-1	0	0	0	2	1	1xbi	0			0	0	2
WBGene00015468	C05D2.6	madf-11	0	0	0	2	1	2xbi	0			0	1	1
WBGene00007732	C25G4.4	spe-44	0	-1	0	3	1	1xbi	0			0	0	0
WBGene00003712	Y41D4B.9	nhr-122	0	0	0	0	1	4xbi	1			2	1	0
WBGene00019824	R02D3.7	R02D3.7	0	0	0	0	1	4xbi	0		-35	0	0	0
WBGene00018740	F53B3.1	tra-4	0	0	0	0	1	5xbi, 1xtri, 2xquad	1			0	2	0
WBGene00007058	F13G11.1	dmd-6	0	0	0	0	1	3xbi	0			0	1	2
WBGene00009203	F28C6.2	aptf-3	0	0	0	0	1	7xbi	0			0	0	1
WBGene00000472	F33A8.3	cey-1	0	0	0	0	1	1xbi, 1xtri, 1xqual	0			0	0	1
WBGene00013096	Y51H1A.6	mcd-1	0	0	0	0	1	5xbi	0			0	0	0
WBGene00020093	R144.3	R144.3	0	0	1	0	1	4xbi	1			0	1	0
WBGene00017733	F23C8.4	ubxn-1	0	0	0	0	1	1xbi	0			0	0	0
WBGene00015507	C06A6.2	C06A6.2	0	0	0	1	1	1xbi	0			3	0	0
WBGene00000899	F25E2.5	daf-3	0	0	0	0	1	2xbi	0			2	0	1
WBGene00019218	H20J04.3	madf-3	0	0	0	1	1	2xbi	0			3	0	0
WBGene00003728	C28D4.9	nhr-138	0	0	1	0	1	1xbi	0			2	0	0
WBGene00006555	ZK829.5	tbx-36	0	0	0	0	1	1xbi	0	-27	31	0	1	2
WBGene00000464	Y54F10AM.4	ceh-44	0	0	0	0	1	2xbi	0	38		0	0	0
WBGene00022182	Y71H2AM.17	Y71H2AM.17	0	0	0	0	1	1xbi	1	-28		1	0	0
WBGene00022060	Y67D8A.3	Y67D8A.3	0	0	0	0	1	1xbi	0		38	0	1	2
WBGene00016905	C53D5.4	ztf-3	0	0	0	0	1	1xbi	0			0	2	3
WBGene00018786	F54A5.1	F54A5.1	0	0	0	0	1	1xbi	0			0	2	0
WBGene00000460	T26C11.7	ceh-39	0	0	0	0	1	1xbi	0			0	2	0
WBGene00001035	T03F6.2	dnj-17	0	0	0	0	1	2xbi	1			0	2	0
WBGene00011259	R13.4	miz-1	0	0	0	0	1	1xbi	0			0	2	0
WBGene00009899	F49E12.6	efl-3	0	0	1	0	1	1xbi	0			0	0	3
WBGene00010704	K09A11.1	K09A11.1	0	0	1	0	1	1xbi	0			0	0	3
WBGene00000383	C17G10.4	cdc-14	0	0	0	0	1	1xbi	0			0	0	0
WBGene00001867	T07G12.12	him-8	0	0	0	0	1	1xbi	0			0	0	1
WBGene00003218	M04B2.1	mep-1	0	0	0	0	1	1xbi	0			0	0	1
WBGene00003620	F21D12.1	nhr-21	0	0	0	0	1	1xbi	0			0	0	0
WBGene00003638	ZK662.3	nhr-48	0	0	0	0	1	2xbi	1			1	1	0
WBGene00000222	F45E6.2	atf-6	0	1	0	0	1	1xbi	0			1	0	0
WBGene00016754	C48E7.11	cebp-2	0	0	0	0	1	1xbi	0			0	0	0
WBGene00008844	F15A4.10	F15A4.10	0	0	0	0	1	2xbi	0			0	0	0
WBGene00009553	F39B2.1	F39B2.1	0	-1	0	0	1	2xbi	0			0	0	1
WBGene00018959	F56D1.1	F56D1.1	0	0	0	1	1	1xbi	0			0	1	0	1/8 abrupt oocyte expansion
WBGene00001975	F45E4.9	hmg-5	0	0	0	0	1	1xbi	0			0	0	0
WBGene00023497	ZK662.4	lin-15B	0	0	0	0	1	1xbi	0			0	0	0	2/8 small oocytes
WBGene00003021	F44B9.6	lin-36	0	0	0	0	1	1xbi	0			0	0	0
WBGene00003087	F49H12.1	lsy-2	0	0	0	0	1	1xbi	0			0	0	0
WBGene00011614	T08D10.1	nfya-1	0	0	0	0	1	2xbi	0			0	0	1
WBGene00003687	H27C11.1	nhr-97	0	0	0	0	1	1xtri	0			0	0	0
WBGene00004077	W10C8.2	pop-1	0	0	0	0	1	1xbi	0			0	0	1
WBGene00004750	F19B10.9	sea-1	0	0	0	0	1	0	0			0	1	0
WBGene00020320	T07F8.4	T07F8.4	0	0	0	1	1	1xbi	0			0	0	0
WBGene00012074	T27A8.2	T27A8.2	0	1	0	1	1	1xbi	0			0	1	1
WBGene00012385	Y5F2A.4	Y5F2A.4	0	0	0	0	1	1xbi	0			0	1	0
WBGene00006986	Y75B8A.35	zip-1	0	0	0	0	1	1xbi	0			0	0	0
WBGene00022681	ZK185.1	ZK185.1	0	0	0	0	1	1xbi	0			0	1	0
WBGene00018704	F52E4.8	ztf-13	0	0	1	0	1	1xbi	0			0	0	0
WBGene00013584	Y80D3A.4	nhr-243	2	-1	0	1	0	0	0			0	0	2
WBGene00012735	Y40B1A.4	sptf-3	3	-1	0	0	0	0	0			0	0	2
WBGene00022278	Y74C9A.4	rcor-1	0	-2	0	2	0	0	0	-41		0	0	0
WBGene00013799	Y116A8C.22	athp-3	0	-2	0	2	0	0	0			0	0	1
WBGene00012674	Y39B6A.12	bed-1	0	-3	0	0	0	0	0			0	0	0
WBGene00020111	R151.8	R151.8	0	-2	0	0	0	0	0			0	0	0
WBGene00017538	F17A9.6	ceh-49	0	0	2	0	0	0	0			0	3	0
WBGene00006546	T07C4.6	tbx-9	0	0	2	0	0	0	0			0	3	0
WBGene00008363	D1046.2	D1046.2	0	0	2	0	0	0	0			0	1	0
WBGene00003692	T06C12.6	nhr-102	0	0	2	0	0	0	0			0	0	0
WBGene00021522	Y41D4B.21	nhr-274	0	0	2	0	0	0	0			0	0	0
WBGene00001981	C44C10.8	hnd-1	0	0	0	2	0	0	0			0	2	3
WBGene00003052	DY3.2	lmn-1	0	-1	0	2	0	0	0			0	2	0
WBGene00021942	Y55F3BR.5	madf-1	0	0	0	3	0	0	0			0	0	2
WBGene00021552	Y44E3B.1	zip-4	0	0	0	2	0	0	0			0	0	3
WBGene00015477	C05D10.1	C05D10.1	0	0	0	2	0	0	0			0	0	0
WBGene00045078	C46C2.7	C46C2.7	0	-1	0	3	0	0	0			0	0	1
WBGene00001162	Y48C3A.17	efl-2	0	0	0	2	0	0	0			1	0	0
WBGene00001979	K05C4.6	hmp-2	0	0	0	3	0	0	0			0	1	1
WBGene00006492	C27A12.3	tag-146	0	0	1	2	0	0	0			0	0	1
WBGene00011956	T23F11.4	T23F11.4	0	-1	0	0	0	0	2			0	2	0
WBGene00003632	C33G8.6	nhr-42	0	0	0	0	0	0	2			0	0	0
WBGene00019611	K10B3.5	K10B3.5	0	0	0	0	0	0	0		-28	2	3	0
WBGene00000443	F31E3.1	ceh-20	0	0	0	0	0	0	0		44	0	2	1
WBGene00021082	W08E12.1	W08E12.1	0	0	0	0	0	0	3			0	3	0
WBGene00003603	F32B6.1	nhr-4	0	0	0	0	0	0	3			0	2	0
WBGene00003639	K10C3.6	nhr-49	0	0	0	0	0	0	2			0	1	0
WBGene00001514	C05D2.5	xnd-1	1	-1	0	0	0	0	0			0	0	0
WBGene00003637	C24G6.4	nhr-47	0	0	0	1	0	0	0			3	1	0
WBGene00013240	Y56A3A.28	Y56A3A.28	0	0	0	0	0	0	0			2	2	0
WBGene00007772	C27C12.2	egrh-1	0	0	0	0	0	0	0			2	0	2
WBGene00015285	C01B12.2	C01B12.2	0	0	0	0	0	0	0			3	0	0
WBGene00000474	M01E11.5	cey-3	0	0	0	0	0	0	0			3	0	1
WBGene00018433	F45C12.2	F45C12.2	0	0	0	0	0	0	0			3	0	0
WBGene00001345	F29G9.4	fos-1	0	0	0	0	0	0	0			2	0	0
WBGene00002004	Y53C10A.12	hsf-1	0	-1	0	0	0	0	0			2	1	0
WBGene00003694	R11E3.5	nhr-104	0	0	0	0	0	0	0			2	0	0
WBGene00003616	C02B4.2	nhr-17	0	0	0	0	0	0	0			2	0	1
WBGene00003656	T09A12.4	nhr-66	0	0	0	0	0	0	0			2	1	0
WBGene00015497	C05G6.1	nhr-76	0	0	0	0	0	0	0			3	1	0
WBGene00006552	Y66A7A.8	tbx-33	0	0	0	0	0	0	0			2	1	0
WBGene00020942	W02D7.6	W02D7.6	0	0	0	0	0	0	0			2	1	0
WBGene00013580	Y79H2A.3	Y79H2A.3	0	0	0	1	0	0	0			2	0	0
WBGene00003014	F02E9.2	lin-28	0	0	0	0	0	0	0	36	-45	0	0	1
WBGene00001974	T20B12.8	hmg-4	0	0	0	0	0	0	0	32		0	0	2
WBGene00003661	K11E4.5	nhr-71	0	0	1	0	0	0	0	-28		0	0	2
WBGene00006395	F43D9.5	taf-11.3	0	0	1	0	0	0	0	41		0	0	2
WBGene00017967	F32A5.1	ada-2	0	0	0	0	0	0	0	23		0	0	0
WBGene00018355	F42G2.6	F42G2.6	0	0	0	0	0	0	1	49		0	1	0
WBGene00019011	F57C9.4	F57C9.4	0	0	0	0	0	0	0	20		0	0	0
WBGene00001585	M04B2.3	gfl-1	0	0	0	0	0	0	0	-40		0	0	0
WBGene00010553	K04C1.3	K04C1.3	0	0	0	0	0	0	0	37		0	0	1
WBGene00003601	C32F10.6	nhr-2	0	0	0	0	0	0	1		45	0	0	0
WBGene00011505	T05G11.1	pzf-1	0	0	0	0	0	0	0		-33	0	0	0
WBGene00001565	C14B9.6	gei-8	0	0	0	0	0	0	0			0	2	3
WBGene00015502	C06A5.4	madf-7	0	0	0	0	0	0	0			1	3	1
WBGene00004334	T01E8.2	ref-1	0	0	0	1	0	0	0			0	2	1
WBGene00003627	F58G6.5	nhr-34	0	1	0	0	0	0	0			0	0	2
WBGene00013006	Y48E1B.7	Y48E1B.7	0	0	0	1	0	0	0			0	0	0	3/8 small oocytes
WBGene00001029	F38A5.13	dnj-11	0	0	0	0	0	0	0			1	1	0
WBGene00020852	T27B7.6	nhr-228	0	0	0	0	0	0	0			0	0	1
WBGene00007433	C08B11.3	swsn-7	0	0	1	0	0	0	0			0	0	0	1/8 abrupt oocyte expansion
WBGene00003690	C28D4.1	nhr-100	0	0	0	0	0	0	0			0	2	2
WBGene00008417	D2030.7	D2030.7	0	0	0	0	0	0	0			1	2	3
WBGene00000095	C25A1.11	aha-1	0	0	0	0	0	0	0			0	2	0
WBGene00008081	C44B9.4	athp-1	0	0	0	0	0	0	0			0	2	0
WBGene00000453	W05E10.3	ceh-32	0	0	0	1	0	0	0			0	2	0
WBGene00000467	F52B5.5	cep-1	0	0	0	0	0	0	0			1	2	1
WBGene00000473	F46F11.2	cey-2	0	0	0	0	0	0	0			0	3	0
WBGene00001092	F53A2.5	dro-1	0	0	0	0	0	0	0			0	2	0
WBGene00018836	F54F2.9	F54F2.9	0	0	0	0	0	0	0			0	2	0
WBGene00012435	Y11D7A.12	flh-1	0	0	0	0	0	0	0			0	2	0
WBGene00012209	W02D9.3	HMG-20	0	0	0	0	0	0	0			1	3	0
WBGene00010770	K11D2.4	K11D2.4	0	-1	0	0	0	0	0			0	3	0
WBGene00003025	T27C4.4	lin-40	0	0	0	0	0	0	0			0	2	0
WBGene00003609	B0280.8	nhr-10	0	0	0	0	0	0	1			0	2	1
WBGene00003612	Y5H2B.2	nhr-13	0	0	0	0	0	0	0			1	2	0
WBGene00018622	F48G7.11	nhr-190	0	0	0	0	0	0	0			0	2	0
WBGene00003659	T23H4.2	nhr-69	0	0	0	0	0	0	0			0	2	0
WBGene00011206	R10E4.11	R10E4.11	0	0	0	0	0	0	0			0	2	0
WBGene00012976	Y48A6C.3	sup-35	0	-1	0	0	0	0	0			0	3	0
WBGene00021374	Y37E11B.1	Y37E11B.1	0	1	0	0	0	0	0			0	3	0
WBGene00013876	ZC376.4	ZC376.4	0	0	0	0	0	0	0			0	2	1
WBGene00007223	C01F6.9	ZNF-706	0	0	0	0	0	0	0			1	2	0
WBGene00007749	C26E1.3	C26E1.3	0	0	0	0	0	0	0			1	1	2
WBGene00020251	T05C1.4	camt-1	0	0	0	0	0	0	0			0	0	2
WBGene00000475	Y39A1C.3	cey-4	0	0	0	0	0	0	0			0	0	2
WBGene00000995	C18D1.1	die-1	0	0	0	0	0	0	0			0	1	2
WBGene00001194	C04A2.3	egl-27	0	1	0	0	0	0	0			0	0	2
WBGene00043705		egrh-2	0	0	0	0	0	0	0			0	0	3
WBGene00015981	C18G1.2	elt-7	0	0	0	0	0	0	0			0	0	2
WBGene00001324	R11E3.6	eor-1	0	-1	0	1	0	0	0			1	0	3
WBGene00005011	F26F4.8	F26F4.8	0	0	0	0	0	0	0			0	0	3
WBGene00001820	F53B2.6	ham-1	0	0	0	0	0	0	0			0	0	3
WBGene00016930	C54G6.1	madf-6	0	0	0	1	0	0	0			0	0	3
WBGene00021132	W10D9.4	nfyb-1	0	0	0	0	0	0	1			0	0	2
WBGene00003611	R04B5.4	nhr-12	0	0	0	0	0	0	0			0	0	3
WBGene00004111	C37A2.5	pqn-21	0	0	0	0	0	0	0			1	0	2
WBGene00004745	F52E10.1	sdc-1	0	0	0	0	0	0	0			0	0	3
WBGene00012584	Y38E10A.6	Y38E10A.6	0	0	0	0	0	0	0			1	0	2
WBGene00013859	ZC247.1	ZC247.1	0	-1	0	0	0	0	0			0	0	2
WBGene00009448	F35H8.3	zfp-2	0	-1	0	1	0	0	0			0	0	2
WBGene00006342	C01B7.1	ztf-12	0	0	0	0	0	0	0			1	0	2
WBGene00044689	Y108G3AL.7	arid-1	0	0	0	0	0	0	0			0	0	0
WBGene00016713	C46E10.9	C46E10.9	0	0	0	0	0	0	0			0	1	0
WBGene00013431	Y66D12A.5	ceh-92	0	0	0	0	0	0	0			0	0	0
WBGene00018140	F37B4.10	F37B4.10	0	0	0	0	0	0	0			1	0	0
WBGene00001958	C18A3.8	hlh-14	0	0	1	0	0	0	0			0	0	0
WBGene00003002	C03B8.4	lin-13	0	0	0	0	0	0	0			0	0	2
WBGene00010012	F53H10.2	saeg-1	0	0	0	0	0	0	0			0	0	0
WBGene00004857	R13F6.9	sma-3	0	0	1	0	0	0	0			0	0	0
WBGene00005006	D1014.8	spr-1	0	0	0	0	0	0	0			0	0	0	2/8 small oocyte
WBGene00013383	Y62E10A.17	aptf-2	0	0	0	0	0	0	0			0	0	0
WBGene00000223	C07G2.2	atf-7	0	0	0	0	0	0	0			0	0	0
WBGene00007105	B0035.1	B0035.1	0	0	0	0	0	0	0			0	0	1
WBGene00015147	B0336.7	B0336.7	0	0	0	0	0	0	0			0	0	0
WBGene00015451	C04F5.9	C04F5.9	0	0	0	0	0	0	0			0	0	0
WBGene00015966	C18C4.5	C18C4.5	0	0	0	0	0	0	0			0	1	1
WBGene00016154	C27A12.2	C27A12.2	0	0	0	0	0	0	0			0	0	0
WBGene00016162	C27D6.4	C27D6.4	0	0	0	1	0	0	0			0	0	0
WBGene00008007	C38D4.7	C38D4.7	0	0	0	0	0	0	0			0	0	0
WBGene00008236	C50F4.12	C50F4.12	0	0	1	1	0	0	0			0	0	1
WBGene00018446	F45C12.15	ceh-83	0	0	0	0	0	0	0			1	0	1
WBGene00044032	T21B4.17	ceh-99	0	0	0	0	0	0	0			0	0	1
WBGene00000793	Y41C4A.4	crh-1	0	0	0	0	0	0	0			0	0	0
WBGene00000912	R13H8.1	daf-16	0	0	0	0	0	0	0			0	0	0
WBGene00000914	F33H1.1	daf-19	0	0	0	0	0	0	0			0	0	1
WBGene00009584	F40F9.7	drap-1	0	0	0	0	0	0	0			0	0	0
WBGene00022861	ZK1193.5	dve-1	0	0	0	1	0	0	0			1	0	0
WBGene00011696	T10G3.5	eea-1	0	0	1	0	0	0	0			0	0	1
WBGene00001186	F55A8.1	egl-18	0	0	1	0	0	0	0			0	0	0
WBGene00001208	F28B12.2	egl-44	0	0	0	0	0	0	0			0	0	1
WBGene00016029	C24A1.2	elf-1	0	0	0	0	0	0	0			0	0	0
WBGene00001249	W09C2.1	elt-1	0	0	0	0	0	0	0			0	0	0
WBGene00001253	F52C12.5	elt-6	0	0	0	0	0	0	0			1	1	0
WBGene00017317	F09G2.9	F09G2.9	0	0	1	0	0	0	0			1	1	0
WBGene00001441	K03C7.2	fkh-9	1	-1	0	0	0	0	0			0	0	1
WBGene00019217	H20J04.2	H20J04.2	0	0	0	0	0	0	0			0	1	0
WBGene00001851	F38A6.3	hif-1	0	0	0	0	0	0	0			0	0	0
WBGene00001972	F47D12.4	hmg-1.2	0	0	0	0	0	0	0			0	0	0
WBGene00001976	T05A7.4	hmg-11	0	0	0	0	0	0	0			0	0	0
WBGene00001977	Y17G7A.1	hmg-12	0	0	0	0	0	0	0			0	0	0
WBGene00002783	F57B10.1	let-607	0	0	0	0	0	0	0			1	0	1
WBGene00003000	ZC247.3	lin-11	0	0	0	0	0	0	0			0	1	0
WBGene00003044	F18A1.3	lir-1	0	0	0	0	0	0	0			0	0	1
WBGene00003045	F18A1.4	lir-2	0	0	0	0	0	0	0			0	0	1
WBGene00003046	F37H8.1	lir-3	1	-1	0	0	0	0	0			0	0	0
WBGene00009834	F47H4.1	lsy-27	0	0	1	0	0	0	0			0	0	1
WBGene00003231	AH6.5	mex-6	0	-1	0	0	0	0	0			0	0	1
WBGene00003378	T20B12.6	mml-1	0	0	0	0	0	0	0			1	1	0
WBGene00003509	T19B10.11	mxl-1	0	0	0	0	0	0	0			1	1	0
WBGene00003510	F40G9.11	mxl-2	0	0	0	0	0	0	0			0	0	0
WBGene00004134	F59B10.1	myrf-1	0	0	0	0	0	0	0			0	0	1
WBGene00017742	F23F1.1	nfyc-1	0	0	0	0	0	0	0			0	0	0
WBGene00003722	R11G11.1	nhr-132	0	0	1	0	0	0	0			0	0	0
WBGene00003614	F33E11.1	nhr-15	0	0	0	0	0	0	0			0	0	0
WBGene00007547	C13C4.2	nhr-154	0	0	0	0	0	0	0			0	0	0
WBGene00018189	F38H12.3	nhr-181	0	-1	1	1	0	0	0			0	0	1
WBGene00018265	F41B5.9	nhr-182	0	0	0	0	0	0	0			1	0	0
WBGene00003618	E02H1.7	nhr-19	0	0	0	0	0	0	0			0	0	1
WBGene00003619	F43C1.4	nhr-20	0	1	0	0	0	0	0			1	0	0
WBGene00003621	K06A1.4	nhr-22	0	0	0	0	0	0	0			1	0	0
WBGene00003626	K08H2.8	nhr-32	0	0	0	0	0	0	0			0	0	1
WBGene00003628	C07A12.3	nhr-35	0	0	0	1	0	0	0			1	0	1
WBGene00003654	C45E1.1	nhr-64	0	0	1	0	0	0	0			0	0	1
WBGene00003674	T06C12.7	nhr-84	0	0	1	0	0	0	0			0	0	1
WBGene00003676	Y40B10A.8	nhr-86	0	0	0	0	0	0	0			1	0	0
WBGene00003685	Y39B6A.17	nhr-95	0	0	0	0	0	0	0			0	0	0
WBGene00003912	C38D4.6	pal-1	0	0	0	0	0	0	0			1	0	1
WBGene00019878	R05D3.3	R05D3.3	0	0	0	0	0	0	0			0	0	0
WBGene00009508	F37D6.2	row-1	0	-1	0	0	0	0	0			0	0	0
WBGene00004735	Y47D3B.7	sbp-1	0	0	0	0	0	0	0			0	1	1
WBGene00005008	C07A12.5	spr-3	0	0	0	0	0	0	0			1	0	0
WBGene00011924	T22C8.3	T22C8.3	0	0	0	1	0	0	0			1	0	0
WBGene00020823	T26A5.8	T26A5.8	0	0	0	0	0	0	0			0	0	0
WBGene00006445	F37D6.6	tag-68	0	0	0	0	0	0	0			0	0	0
WBGene00006547	F40H6.4	tbx-11	0	0	0	1	0	0	0			0	0	0
WBGene00006577	F39H11.2	tlf-1	0	-1	0	1	0	0	0			0	0	1
WBGene00006604	Y47D3A.6	tra-1	0	0	0	0	0	0	0			0	0	0
WBGene00006959	R74.3	xbp-1	0	0	0	0	0	0	0			0	1	0
WBGene00012994	Y48C3A.12	Y48C3A.12	0	0	0	1	0	0	0			0	0	0
WBGene00013128	Y52B11A.9	Y52B11A.9	1	0	0	0	0	0	0			0	0	0
WBGene00013270	Y57A10A.31	Y57A10A.31	0	0	0	0	0	0	0			0	0	0
WBGene00013465	Y67H2A.10	Y67H2A.10	1	-1	0	0	0	0	0			1	0	0
WBGene00022268	Y73E7A.1	Y73E7A.1	1	-1	1	1	0	0	0			0	0	0
WBGene00022518	ZC123.3	ZC123.3	0	0	0	0	0	0	0			0	0	0
WBGene00022554	ZC204.2	ZC204.2	0	0	0	0	0	0	0			0	0	0
WBGene00011600	T07G12.10	zim-2	0	1	0	0	0	0	0			0	0	0
WBGene00011601	T07G12.11	zim-3	0	0	0	0	0	0	0			0	0	1
WBGene00022794	ZK686.4	ZK686.4	0	0	0	0	0	0	0			0	1	1
WBGene00021689	Y48G8AL.10	ZNF-236	0	0	0	0	0	0	0			0	0	0
WBGene00009939	F52F12.6	ztf-11	0	0	1	0	0	0	0			0	0	0
WBGene00012702	Y39B6A.46	ztf-20	0	0	1	0	0	0	1			1	1	0
WBGene00012988	Y48C3A.4	ztf-22	0	0	0	0	0	0	0			0	1	0
WBGene00011661	T09F3.1	ztf-27	0	0	0	0	0	0	0			0	0	0	1/8 abrupt expansion
WBGene00018099	F36F12.8	ztf-28	0	0	0	0	0	0	0			0	0	0
WBGene00022598	ZC395.8	ztf-8	0	0	1	1	0	0	0			0	0	0
