# Supplementary material for: A Transcription Factor Functional Atlas of Germline Development
Source: Research Square preprint supplement (doi:10.21203/rs.3.rs-3880498/v1), 2024-01-26
Supplement: Supplementary file 4 [file 1f332c527c5a9938fbbfd483.xlsx]

## Sheet: reported phenotypes of TFs
	Note: Phenotypes are separated for each gene. If the phenotypes are from same paper, they will be grouped together. References are based on searching wormbase and pubmed. Study type indicates how genes have been studied. Indirect: Screen or in the mechanisitc study of other gene; Direct: A mechanistic study. Description is for the genes with a mechanistic study.
Gene.Public.Name	WormBase Gene ID	Phenotype					Phenotype					Phenotype					Phenotype					Phenotype					Phenotype
		Phenotype	Allele/RNAi	Reference (PMID)	Study type	Description	Phenotype	Allele/RNAi	Reference (PMID)	Study type	Description	Phenotype	Allele/RNAi	Reference (PMID)	Study type	Description	Phenotype	Allele/RNAi	Reference (PMID)	Study type	Description	Phenotype	Allele/RNAi	Reference (PMID)	Study type	Description	Phenotype	Allele/RNAi	Reference (PMID)	Study type	Description
mcd-1	WBGene00013096	Sterile/Reduced brood size	RNAi	17417969	Indirect	-	Apoptosis fails to occur	n3376	17237514	Indirect	mcd-1 mutation caused five extra VC-like cells in the ventral cords in the backgroud of ced-3(n2427) mutants.
C02F5.12	WBGene00015352	Sterile/Rachis morphology variant/Oocyte septum formation variant/Gonad vesiculated/Germ cell compartment morphology variant	RNAi	21529718	Indirect	-
nhr-114	WBGene00003704	Sterile/Multinucleation in the distal germline/Germ cell proliferation reduced	gk849/ef24/RNAi	23499532	Direct	nhr-114 RNAi or mutants causes sterility. But in nhr-114(-) animals, the induction of germline defects and sterility depends on bacterial metabolic status, with respect to the essential amino acid tryptophan.	Sterile F1	RNAi	15791247	Indirect	-
lsl-1	WBGene00009937	Sterile/Meiotic prophase progression delay/Increased germline apoptosis/Production of almost non-functional gametes	ljm1	35262739	Direct	LSL-1 functions by antagonizing heterochromatin proteins HPL-2/HP1 and LET-418/Mi2, that control repression of germline genes in somatic cells	Sterile	tm4769	JapanNational Bioresource	-	-
T26A5.8	WBGene00020823	Sterile/Embryonic lethality	RNAi	16845399	Indirect	-
vep-1 (B0261.1)	WBGene00015091	Sterile progeny	RNAi	11099033	Indirect	-	Maternal sterile	RNAi	15489339	Indirect	-
ZNF-593	WBGene00013236	Sterile progeny	RNAi	12529635	Indirect	-	Sterile	tm4787/tm4436	JapanNational Bioresource	-	-
F58G1.2	WBGene00010264	Sterile F1	RNAi	15791247	Indirect	-
ceh-38	WBGene00000459	Sterile	tm289	JapanNational Bioresource	-	-
dpl-1	WBGene00001061	Sterile	RNAi	26063786	Indirect	-	Somatic gonad development variant	RNAi	16198291	Indirect	-	Sterile	RNAi	19368797	Direct	DPL-1 functions in the germ line to regulate ovulation and promotes fertilization by regulating multiple egg genes.
ztf-17	WBGene00011639	Sterile	tm7982	JapanNational Bioresource	-	-
slr-2	WBGene00013350	Sterile	tm4914	JapanNational Bioresource	-	-
gldi-8 (Y111B2A.10)	WBGene00013734	Sterile	tm4385	JapanNational Bioresource	-	-
F44E2.7	WBGene00018420	Sterile	tm4302	JapanNational Bioresource	-	-
ztf-4	WBGene00020399	Sterile	tm4372	JapanNational Bioresource	-	-	Cell proliferation increased	RNAi	18945809	Indirect	ztf-4 RNAi caused extra intestinal cells.
ZK546.5	WBGene00022762	Sterile	tm769	JapanNational Bioresource	-	-
nsy-7	WBGene00044508	Sterile	tm3112	JapanNational Bioresource	-	-
hmp-2	WBGene00001979	Sterile	tm4827	JapanNational Bioresource	-	-
hmg-20 (W02D9.3)	WBGene00012209	Sterile	RNAi	12242227	Indirect	-
hmg-5	WBGene00001975	Sterile	tm3586	JapanNational Bioresource	-	-	Sterile progeny	RNAi	11231151	Indirect	-
R151.8	WBGene00020111	Sterile	RNAi	22180091	Indirect	-
tbx-2	WBGene00006543	Sterile	tm282	JapanNational Bioresource	-	-
znf-706 (C01F6.9)	WBGene00007223	Sterile	tm4820	JapanNational Bioresource	-	-
D1046.2	WBGene00008363	Sterile	tm528/tm529	JapanNational Bioresource	-	-
Y57A10A.31	WBGene00013270	Sterile	tm2349	JapanNational Bioresource	-	-
F33H1.4	WBGene00009365	Sterile	RNAi	22180091	Indirect	-
znf-622 (C16A3.4)	WBGene00015809	Sterile	tm1976	JapanNational Bioresource	-	-	Sterile progeny	RNAi	14551910	Indirect	-
ztf-23	WBGene00021846	Sterile	tm4926	JapanNational Bioresource	-	-
nhr-22	WBGene00003621	Sterile	tm7936	JapanNational Bioresource	-	-
nhr-97	WBGene00003687	Sterile	tm1286	JapanNational Bioresource	-	-
lag-1	WBGene00002245	Sterile	tm3052	JapanNational Bioresource	-	-	Sterile	RNAi	16845399	Indirect	-	Germ cell mitosis variant	q426/q416	1769331	Direct	lag-1 mutation caused failed proliferation of germ line.	Reduced brood size	RNAi	15489339	Indirect	-	Reduced germ cell proliferation	q385/q426	12586701	Direct	lag-1 mutation caused a highly penetrant glp-1(loss of function)-like germline phenotype.	Embryonic lethality	om13	29030483	Indirect	-
W04D2.4	WBGene00012243	Sterile	tm586	JapanNational Bioresource	-	-	Radiation induced germ cell apoptosis resistant	tm586	15605074	Indirect	-	nuclear appearance variant/no oocytes/fewer germ cells	RNAi	20599896	Indirect	-	Embryonic lethality/Sterile progeny	RNAi	11231151	Indirect	-
ekl-4	WBGene00013676	Sterile	tm1710	JapanNational Bioresource	-	-	Sterile	RNAi	17417969	Indirect	-	Embryonic lethality/Sterile progeny	RNAi	11099033	Indirect	-
lin-28	WBGene00003014	Sterile	tm4566	JapanNational Bioresource	-	-	Reduced number of germline progenitor cells/Reduced brood size	n719/RNAi	27730721	Direct	Decreased germline progenitor cell number induced by lin-28 loss of function was linked with the dietary regulation (LIN‐28/let‐7/AKT/DAF‐16 axis).
sup-37 (ztf-12)	WBGene00006342	Sterile	tm356/tm1083	JapanNational Bioresource	-	-	Cell cycle progression variant/Germ cell ionizing radiation response variant	RNAi	16824923	Indirect	-	Embryonic lethality	RNAi	12529635	Indirect	-
tra-1	WBGene00006604	Sterile	RNAi	22500807	Indirect	-	Sterile progeny	RNAi	14551910	Indirect	-	Feminization of XX and XO animals	e1998/e1962	3770465	Direct	tra-1 mutation caused complete feminization.	Gonad development varaint	e1076/e440	560330	Direct	tra-1 mutation caused feminization.
spe-44	WBGene00007732	Spermatogenesis defects/Sterile progeny	ok1400	22570621/36135804	Direct	SPE-44 deletion in males causes sperm-specific defects in cytokinesis, cell cycle progression, and fibrous body-membranous organelle assembly, resulting in sterility.
lin-39	WBGene00003024	Sperm transfer initiation defective	n1880/n1760	16911797	Direct	lin-39 male mutants are unable to initiate the sperm-transfer step of male mating behaviour.	Programmed cell death increased	RNAi	19254707	Direct	Studied in VC neurons
nhr-49	WBGene00003639	Reduced fecundity in postdauer adults that experienced starvation	ok2165	34236316	Indirect	-	Sterile	RNAi	16845399	Indirect	-
jun-1	WBGene00012005	Reduced brood size/Sterile progeny/Sterile	RNAi	17417969	Indirect	-	Ovulation variant	RNAi	19570917	Direct	JUN-1 can regulate the spermathecal-specific expression of plc-1. jun-1 knockdown blocks dilation of the distal spermathecal valve, a critical step for the entry of mature oocytes into the spermatheca for fertilization.	Spermatheca development varaint	RNAi	24178943	Direct	JUN-1 and NHR-6 function together to regulate development of the spermatheca
isw-1	WBGene00002169	Reduced brood size/Sterile progeny	RNAi	17417969	Indirect	-	Sterile	Allele/RNAi	16774993	Direct	isw-1 and nurf-1 mutations suppress both the synMuv phenotype and the multivulva phenotype caused by overactivation of the Ras pathway.	Germ cell development variant	RNAi	26050091	Inirect	The ISW-1 complex is required for soma to germ transformation in lsy-2 mutants
nhr-69	WBGene00003659	Reduced brood size/ Decreased number of germ cells/ Decreased sperm count	ok1926	36857914	Indirect	-	Decreased fecundity	ok1926	31366938	Indirect	-
hlh-30	WBGene00020930	Reduced brood size	RNAi	16507136	Indirect	-	Sterile	RNAi	16845399	Indirect	-
zip-2	WBGene00019327	Reduced brood size	RNAi	27348851	Indirect	-
lin-11	WBGene00003000	Reduced brood size	RNAi	15885697	Indirect	-
snpc-4	WBGene00001568	Reduced brood size	RNAi	15489339	Indirect	-	Reduced brood size/Sterile	RNAi	17417969	Indirect	-	Sterile	tm4568	JapanNational Bioresource	-	-
tbp-1	WBGene00006542	Reduced brood size	RNAi	15489339	Indirect	-	Transgene subcellular localization variant	RNAi	30567997	Indirect	TBP-1 and TOFU-3 are required for the formation of TOFU-5 foci in germ cell nuclei.
egl-44	WBGene00001208	Reduced brood size	n998/n1080/n1087	2721931	Indirect	-	Sterile progeny/Maternal sterile	RNAi	12529635	Indirect	-	Cell proliferation increased	cas19/cas140/cas3/cas6/cas58	23946438	Direct	egl-44 mutation caused extra AQR or PQR neurons.	Sterile	tm4799	JapanNational Bioresource	-	-
hinf-1 (F39B2.1)	WBGene00009553	Reduced brood size	RNAi	17417969	Indirect	-	Sterile	RNAi	17417969	Indirect	-
efl-2	WBGene00001162	Reduced apoptosis	tm2359	17881492	Direct	EFL-2 acts downstream of or in parallel to cep-1 and egl-1 to cause DNA damage-induced germ cell apoptosis
mex-6	WBGene00003231	P granule abnormal	RNAi	18692039	Indirect	-
egrh-1	WBGene00007772	Oocyte accumulation/Oogenesis variant/Reduced brood size/Embryonic lethality	tm1736	20736289	Direct	egrh-1 mutation exhibited decreased self-progeny and degrading proximal oocytes.
swsn-1	WBGene00004203	Maternal sterile	RNAi	15489339	Indirect	-	Maternal sterile	RNAi	15280233	Indirect	-	Reduced brood size/Sterile	RNAi	17417969	Indirect	-	Sterile	tm4567	JapanNational Bioresource	-	-
ceh-91 (Y66A7A.5)	WBGene00013425	Maternal sterile	RNAi	15489339	Indirect	-
xnd-1	WBGene00001514	Maternal sterile	RNAi	11447255	Indirect	-	Meiotic progression prophase variant	RNAi	12242227	Indirect	-	Meiotic progression prophase variant	ok708	20944745	Direct	XND-1 regulates the global meitoic crossover and the formation of double-strand breaks on the X chromosome, but XND-1 protein in autosomally-enriched.	No germ line/Reduced brood size/Sterile progeny/Germ cell proliferation reduced	ok708	26395476	Direct	XND-1 functions redundantly with nos-2 and nos-1 to promote germline fates by maintaining transcriptional quiescence and regulating germ cell proliferation.	Sterile progeny	RNAi	21305687	Indirect	-
attf-2 (F09G2.9)	WBGene00017317	Maternal sterile	RNAi	12445391	Indirect	-
pal-1	WBGene00003912	Maternal sterile	RNAi	11231151	Indirect	-	Cell differentiation variant	RNAi	11463373	Indirect	Studied in EMS cells
bed-3	WBGene00009133	Maternal effect embryonic lethality/ Cell proliferation reduced	sy700	20005870	Direct	Studied in vulva cell division
hsf-1	WBGene00002004	Gonad development variant	RNAi	12897069	Direct	hsf-1 RNAi caused a temperature-sensitive developmental arrest at the L2/L3 stage.	Sterile progeny	RNAi	14551910	Indirect	-	Reduced brood size/ Sterile/ Meiotic arrest at the pachytene or diplotene stage/ Decrease in total germline nuclei, S phase nuclei, and the S index	Germline-specific auxin	34469721	Direct	HSF-1 is required for mitotic proliferation of germline progenitor cells and early meiosis. IIS(insulin/IGF-1 signaling) and FOXO/DAF-16 non-cell-autonomously regulate HSF-1 activity in the germline
lin-26	WBGene00003012	Germline development variant	mcIs11	9671593	Direct	Loss of LIN-26 expression in the somatic gonad causes endomitotic oocytes and decreased germine proliferation.
snu-66 (F19F10.9)	WBGene00017605	Germ cell development variant/Oocyte morphology variant/Oocytes disorganized/Tumorous germline	RNAi	20419786	Indirect	-	Sterile/Embryonic lethality/No oocytes/Gonad development variant/Germ cell development variant	RNAi	20308279	Indirect	-	Excess intestinal cells	RNAi	18945809	Indirect	snu-66 RNAi caused extra intestinal cells.
cdc-5L	WBGene00008386	Germ cell development variant/Gonad morphology variant/Sterile	RNAi	20419786	Indirect	-	Sterile	tm3541	JapanNational Bioresource	-	-	Cell proliferation increased	RNAi	18945809	Indirect	cdc-5L RNAi caused extra intestinal cells.
lin-54	WBGene00003037	Germ cell development variant/Endomitotic oocyte	n3423/n2990	24281426	Direct	lin-54 mutation itself doesn't affect germline proliferation. But concomitant loss of lin-54 suppresses the severe germline proliferation defect caused by mes-4 single mutants.	Sterile	tm8341/tm932	JapanNational Bioresource	-	-
him-17	WBGene00001874	Germ cell development variant	Alleles/RNAi	17237503	Direct	Regulate balance between germ cell proliferation and meiotic development	Increased apoptosis	RNAi	21909284	Indirect	-	Meiosis variant/Univalent meiotic chromosomes	RNAi	12242227	Indirect	-	Meiosis variant	Alleles/RNAi	15315757	Direct	HIM-17 regulates initiation of meiotic recombination by the SPO-11 enzyme and promotes proper accumulation of the H3MeK9 modification during meiotic prophase progression.	Meiosis variant	Alleles/RNAi	33883277	Direct	Ensure normal chromosome remodeling by 1) regulating the distribution of DSB-dependent RAD-51 foci and crossover; 2) promoting the normal localization of protein phosphatases GSP-1/GSP-2 and potentially GSP-1 phosphorylation, thereby antagonizing Aurora B kinase/AIR-2
hmg-3	WBGene00001973	Germ cell development variant	RNAi	30078731	Direct	HMG-3 depletion allows germ cell reprogramming to neurons	Germline development varaint/Sterile	tm2539/RNAi	30336114	Direct	hmg-3 RNAi causes sterility. hmg-3 mutants exhibit germline proliferation and sperm but lack oocytes	Rachis narrow/Oocyte number decreased/Germ cell compartment morphology variant/Oogenesis variant/Sterile	RNAi	21529718	Indirect	-	Gonad morphology variant/Meiotic progression prophase variant	RNAi	12242227	Indirect	-	Maternal sterile	RNAi	15489339	Indirect	-	Sterile progeny	RNAi	12445391	Indirect	-
atfs-1	WBGene00013878	Germ cell development variant	tm4919	25274306	Indirect	-	Reduced brood size	et15	23530189	Indirect	-
repo-1	WBGene00008683	Germ cell development variant	RNAi	20419786	Indirect	-	Cell proliferation increased	RNAi	18945809	Indirect	repo-1 RNAi caused extra intestinal cells.	Sterile	RNAi	17417969/22180091	Indirect	-
swsn-3 (Y71H2AM.17)	WBGene00022182	Embryonic lethality	RNAi	36063055	Direct	SWSN-3 may act in somatic gonadogenesis but need more clarification.	Sterile	RNAi	16845399	Indirect	-
attf-6 (Y18D10A.1)	WBGene00012474	Embryonic lethality	RNAi	14551910	Indirect	-
let-607	WBGene00002783	Distal tip cell turn defects	RNAi	24811939	Direct	LET-607 regulates directional changes during DTC migration	Embryonic and early larval lethality	Allele/RNAi	27510972	Direct	LET-607 mediates embryonic lethality. The C22-induced embryonic lethality requires the upregulation of the LET-607/CREBH transcription factor and its candidate target genes	Apoptosis increased	RNAi	18635357	Indirect	In embryogenesis	Germ cell compartment expansion variant/Germ cell compartment anucleate/Pachytene region organization variant/Diplotene region organization variant/Oocyte number decreased/Oocytes lack nucleus/Apoptosis reduced/Sterile	RNAi	21529718	Indirect	-	Reduced brood size	RNAi	15489339	Indirect	-	Sterile	tm1423	JapanNational Bioresource	-	-
daf-3	WBGene00000899	Distal tip cell signalling variant	e1376	28811311	Direct	LAG-2 expression in the DTC is regulated positively by DAF-7/TGFβ signaling and negatively by DAF-3 and DAF-5.
F23B12.7	WBGene00009084	Distal tip cell morphology variant	RNAi	28648843	Indirect	-	Maternal sterile	RNAi	15687288	Indirect	-	Reduced brood size	RNAi	15489339	Indirect	-	Sterile	tm5029	JapanNational Bioresource	-	-
cid-1 (cde-1)	WBGene00019629	Chromosome segregation defects	tm1021/tm936	19804759	Direct	CDE-1 is required for the uridylation of CSR-1 bound siRNAs. cde-1 mutation causes inapproproate accumulation of these siRNAs, accompanied by defects in both meiotic and mitotic chromosome segregation.	Fewer germ cells/Germline proliferation variant/Gonad development variant/Sterile	ok2759	21775471	Indirect	-	Sterile progeny	RNAi	11231151	Indirect	-
wrm-1	WBGene00006943	Cell division variant	RNAi	19607822/24762815/17276345/	Direct	WRM-1 regulates asymmetric division of seam cell by Wnt/MAPK signaling	Somatic gonad precursor symmetrical sisters	RNAi	11807036	Direct	wrm-1 RNAi causes symetrical division of Z1/Z4 somatic gonodal precursor cells.	Sterile	tm514	JapanNational Bioresource	-	-	Mitotic spindle defective early emb	RNAi	15572126	Direct	In 30% of wrm-1(RNAi) embryos, the rotation of the ABar spindle is delayed until mid- to late anaphase
egl-18	WBGene00001186	Cell differentiation variant	ok290	29553368	Indirect	Studied in HSN neurons	Sterile	RNAi	17417969/16507136/16845399	Indirect	-	Reduced brood size	RNAi	17417969/16884526	Indirect	-
elt-7	WBGene00015981	Cell differentiation variant	ok290	35758255	Indirect	Studied in endoderm development
let-526	WBGene00002717	Apoptosis variant/Germ cell compartment morphology variant/Germ cell partition morphology variant/Oocyte septum formation variant/Oocyte number decreased	RNAi	21529718	Indirect	-	Maternal sterile	RNAi	15489339	Indirect	-	Reduced brood size	RNAi	17417969	Indirect	-	Sterile	tm2975/tm4795	JapanNational Bioresource	-	-	Somatic gonad development variant	RNAi	24402584	Indirect	-
pop-1	WBGene00004077	Apoptosis reduced/Germ cell development variant/Germline nuclear positioning variant/Oocyte number decreased/Sterile	RNAi	21529718	Indirect	-	Distal tip cell development variant	q624/RNAi	19376107/16890160	Direct	-	Cell differentiation variant	RNAi	19818340	Indirect	Studied in the EMS specification	No oocytes	RNAi	20308279	Indirect	-	Gonad development variant/Germline proliferation variant	q645/RNAi	15020416/15907376/11807036	Direct	POP-1 controls the Z1/Z4 asymmetric division and hence controls proximal-distal axis formation.	Cell proliferation reduced	RNAi	19427847	Indirect	pop-1 RNAi results in fewer M-lineage derived coelomocytee.
tbx-33	WBGene00006552	Apoptosis increased/Germ cell compartment morphology variant/Germ cell compartment multinucleate/Sterile	RNAi	21529718	Indirect	-	Sterile	RNAi	16507136	Indirect	-	Sterile	tm4597	JapanNational Bioresource	-	-
zim-2	WBGene00011600	Apoptosis increased/Chromosome morphology variant/Synapsis defective	RNAi/tm574	20008570	Indirect	-	Disjunction of the X chromosome	tm574	19620970	Indirect	-	Reduced crossovers on chromosome V	tm574	36792551	Direct	zim-2 mutation causes crossover defects on chromosome V, but has fewer dead embryos than that expected from random segregation.	Meiotic chromosome missegregation and unsynapsed chromosomes	tm574	17141157	Direct	ZIM-2 together with other ZIM proteins (ZIM-1, ZIM3) concentrate at meiotic pairing centers.
him-8	WBGene00001867	Apoptosis increased	RNAi	21909284/20008570	Indirect	-	Male fertility reduced/ High incidence male progeny	e1489	17248881	Indirect	-	Impaired X chromosome territory elongation	e1489/ me4	21876678	Direct	HIM-8 promotes elongation of X chromosome territories, mediates local stabilization of pairing and association of X chromosomes with mobile SUN-1/ZYG-12 patches.	Impaired Meiotic Pairing and Synapsis	tm611	19620970	Direct	Meiotic pairing and synapsis mediated by the integrated array requires HIM-8 function,	X chromosome nondisjunction	e1489	8138150	Direct	him-8 mutation caused a reduced levels of X chromosome recombination and increase in nondisjunction.	Sterile	tm611	JapanNational Bioresource	-	-
dnj-11	WBGene00001029	Apoptosis fails to occur/Reduced brood size/Spindle orientation variant	bc212	18399720	Indirect	Studied in NSM
ceh-40	WBGene00000461	-	-	-	-	-
fkh-3	WBGene00001435	-	-	-	-	-
hmg-1.1	WBGene00001971	-	-	-	-	-
nhr-1	WBGene00003600	-	-	-	-	-
nhr-28	WBGene00003624	-	-	-	-	-
nhr-40	WBGene00003630	-	-	-	-	-
sma-9	WBGene00004862	-	-	-	-	-
unc-98	WBGene00006827	-	-	-	-	-
madf-5	WBGene00007242	-	-	-	-	-
madf-8 (C46F11.3)	WBGene00008118	-	-	-	-	-
myrf-2 (F21A10.2)	WBGene00008999	-	-	-	-	-
F21D5.4	WBGene00009009	-	-	-	-	-
madf-2 (F36D1.1)	WBGene00009461	-	-	-	-	-
ztf-7	WBGene00009772	-	-	-	-	-
F52B5.7	WBGene00009923	-	-	-	-	-
ztf-15	WBGene00011066	-	-	-	-	-
pole-4 (Y53F4B.3)	WBGene00013150	-	-	-	-	-
ztf-9	WBGene00013966	-	-	-	-	-
nhr-161	WBGene00016364	-	-	-	-	-
lst-5	WBGene00016890	-	-	-	-	-
F41H10.4	WBGene00018317	-	-	-	-	-
ztf-1	WBGene00018833	-	-	-	-	-
dmd-7	WBGene00019521	-	-	-	-	-
ceh-93	WBGene00019864	-	-	-	-	-
Y37F4.6	WBGene00021387	-	-	-	-	-
nhr-256	WBGene00022805	-	-	-	-	-
egrh-3	WBGene00044651	-	-	-	-	-
mxl-1	WBGene00003509	-	-	-	-	-
mxl-2	WBGene00003510	-	-	-	-	-
ceh-20	WBGene00000443	-	-	-	-	-
mbf-1	WBGene00003148	-	-	-	-	-
baz-2	WBGene00001470	-	-	-	-	-
nfi-1	WBGene00003592	-	-	-	-	-
tag-68	WBGene00006445	-	-	-	-	-
gei-8	WBGene00001565	-	-	-	-	-
F54F2.9	WBGene00018836	-	-	-	-	-
tbx-11	WBGene00006547	-
C30G4.4	WBGene00016269	-	-	-	-	-
daf-19	WBGene00000914	-	-	-	-	-
elf-1	WBGene00016029	-	-	-	-	-
lir-3	WBGene00003046	-	-	-	-	-
pqn-21	WBGene00004111	-	-	-	-	-
C38D4.7	WBGene00008007	-	-	-	-	-
ztf-27	WBGene00011661	-	-	-	-	-
T22C8.3	WBGene00011924	-
F37B4.10	WBGene00018140	-	-	-	-	-
K11D12.12	WBGene00019651	-	-	-	-	-
R02D3.7	WBGene00019824	-	-	-	-	-
R05D3.3	WBGene00019878	-	-	-	-	-
ZK185.1	WBGene00022681	-	-	-	-	-
znf-207 (B0035.1)	WBGene00007105	-	-	-	-	-
R10E4.11	WBGene00011206	-	-	-	-	-
K09H9.7	WBGene00019598	-	-	-	-	-
K10B3.5	WBGene00019611	-	-	-	-	-
Y67H2A.10	WBGene00013465	-	-	-	-	-
Y37E11B.1	WBGene00021374	-	-	-	-	-
row-1	WBGene00009508	-	-	-	-	-
F26F4.8	WBGene00005011	-	-	-	-	-
eor-1	WBGene00001324	-
nhr-15	WBGene00003614	-	-	-	-	-
nhr-35	WBGene00003628	-	-	-	-	-
nhr-48	WBGene00003638	-	-	-	-	-
nhr-84	WBGene00003674	-	-	-	-	-
nhr-182	WBGene00018265	-	-	-	-	-
nhr-146	WBGene00045255	-	-	-	-	-
hmg-11	WBGene00001976	-	-	-	-	-
nhr-20	WBGene00003619	-	-	-	-	-
nhr-100	WBGene00003690	-	-	-	-	-
drap-1	WBGene00009584	-	-	-	-	-
K09A11.1	WBGene00010704	-	-	-	-	-
ztf-22	WBGene00012988	-	-	-	-	-
Y56A3A.28	WBGene00013240	-	-	-	-	-
C18C4.7 (C18C4.5)	WBGene00015966	-	-	-	-	-
egrh-2	WBGene00043705	-	-	-	-	-
