# Supplementary material for: A Transcription Factor Functional Atlas of Germline Development
Source: Research Square preprint supplement (doi:10.21203/rs.3.rs-3880498/v1), 2024-01-26
Supplement: Supplementary file 5 [file 31f785259156313a97e747b9.xlsx]

## Sheet: TF expression in the germ line
Public Name	WormBase Gene ID	Sequence Name	RNA seq of isolated germ lines, this study (CPM)			Tzur et al., Genetics 2018 (counts)																				Cao et al., Science 2017 (CPM)
			WT-R1 CPM	WT-R2 CPM	WT-R3 CPM	1	2	3	4	5	6	7	8	9	10	1	2	3	4	5	6	7	8	9	10	Germ line
C02F5.12	WBGene00015352	C02F5.12	17.009	21.844	15.612	0	1	1	1	1	26	9	3	2	11	1	0	0	3	6	11	5	1	5	5	1.60507	Confirmed PZ size changes after RNAi
C30G4.4	WBGene00016269	C30G4.4	9.159	10.087	7.986	1	1	0	0	4	0	0	0	0	1	0	1	0	1	0	1	0	0	0	0	1.80025
daf-19	WBGene00000914	F33H1.1	13.91	14.52	13.93	0	0	0	0	0	9	3	0	2	12	0	0	0	0	2	7	4	7	3	3	4.89292
F54F2.9	WBGene00018836	F54F2.9	21.829	25.891	35.667	1	6	11	31	30	45	2	7	12	28	4	13	22	10	35	10	14	5	20	9	162.798
ZK546.5	WBGene00022762	ZK546.5	33.467	39.319	41.911	6	7	15	29	27	30	5	7	11	20	5	19	17	20	28	17	4	8	11	4	132.612
hsf-1	WBGene00002004	Y53C10A.12	65.005	65.66	65.329	13	52	94	124	165	122	18	24	26	84	17	17	44	74	117	68	18	47	31	27	171.225
let-607	WBGene00002783	F57B10.1	89.658	94.699	75.777	4	22	45	59	117	85	17	23	26	79	1	16	27	56	93	52	28	37	45	29	120.881
nhr-84	WBGene00003674	T06C12.7	3.994	3.662	2.702	0	0	0	0	0	3	0	0	0	2	0	0	0	0	0	1	0	0	1	0	0.238927
xnd-1	WBGene00001514	C05D2.5	115.756	111.917	113.665	11	51	70	111	112	68	6	16	27	50	12	28	53	74	76	41	10	11	19	14	203.469
ztf-23	WBGene00021846	Y54E10BR.8	132.765	145.903	169.627	1	9	15	23	24	14	1	0	7	8	1	0	9	10	19	10	4	2	6	0	87.6379
nhr-146	WBGene00045255	Y41D4B.27	1.653	1.606	1.081	0	0	0	0	0	3	0	2	0	0	0	0	0	0	0	1	0	2	0	0	0.275478
dmd-7	WBGene00019521	K08B12.2	4.683	3.726	5.284	0	0	1	0	0	3	0	1	2	6	0	0	0	0	1	5	3	1	5	1	1.32863	Confirmed phenotype of multinucleation after RNAi
baz-2	WBGene00001470	ZK783.4	34.431	36.685	38.069	0	1	1	0	0	30	3	6	6	19	0	0	1	0	6	12	6	6	8	7	2.04023
jun-1	WBGene00012005	T24H10.7	16.251	22.422	13.991	0	0	0	0	0	3	0	0	1	3	0	0	0	2	0	1	0	0	0	1	1.39325
mter-4	WBGene00010771	K11D2.5	8.332	8.802	7.806	1	9	8	11	25	4	0	1	2	6	3	4	5	13	4	4	1	1	0	0	17.0492
lin-26	WBGene00003012	F18A1.2	73.544	72.277	83.643	4	35	66	95	101	65	13	10	38	67	7	18	51	32	70	35	18	14	21	11	59.664
madf-5	WBGene00007242	C01G12.1	1.584	2.57	1.381	0	0	0	0	0	9	1	0	2	1	0	0	0	0	0	6	2	1	0	1	1.79007
nhr-40	WBGene00003630	T03G6.2	3.099	2.441	3.002	0	0	1	0	0	10	3	6	4	3	0	0	0	0	3	5	0	1	2	0	1.06246
nhr-114	WBGene00003704	Y45G5AM.1	1.033	1.092	4.443	2	0	3	3	1	1	0	0	2	0	0	0	0	0	1	0	0	0	0	0	0.690547
nhr-161	WBGene00016364	C33G8.7	2.135	1.927	2.942	0	0	0	0	0	1	0	0	0	4	0	0	0	0	0	5	0	0	0	0	0.142575
unc-62	WBGene00006796	T28F12.2	13.841	12.785	11.769	1	1	6	2	0	19	7	2	6	21	0	1	0	2	9	13	8	6	14	6	2.2486
cey-2	WBGene00000473	F46F11.2	1582.44	1763.62	1595.28	53	356	642	723	785	598	142	136	260	391	54	143	426	795	575	226	128	58	97	40	286.979
cey-3	WBGene00000474	M01E11.5	668.371	926.624	726.666	65	216	407	416	498	275	57	64	113	248	65	86	234	454	371	164	92	63	91	52	433.237
D2030.7	WBGene00008417	D2030.7	501.037	606.164	675.267	7	23	46	41	42	35	3	2	9	21	10	11	23	15	23	19	5	0	4	3	102.019
ztf-7	WBGene00009772	F46B6.7	479.346	423.062	528.817	36	160	176	174	209	115	10	20	31	59	39	64	97	176	136	67	31	20	48	19	654.663
xbp-1	WBGene00006959	R74.3	441.058	539.412	440.491	3	11	27	60	117	91	7	9	17	54	9	8	23	25	87	43	10	15	23	8	87.1068
F19F10.9	WBGene00017605	F19F10.9	379.703	374.492	394.076	9	46	63	78	81	47	2	11	15	32	16	41	46	74	86	33	20	21	35	12	933.215
cey-4	WBGene00000475	Y39A1C.3	289.838	275.681	325.144	50	215	196	195	219	147	22	21	41	114	66	90	115	170	132	85	60	20	39	21	1151.21
mex-6	WBGene00003231	AH6.5	279.371	296.561	313.375	3	10	27	77	217	156	22	26	49	134	3	11	28	60	171	86	41	21	51	30	96.2306
hmg-3	WBGene00001973	C32F10.5	254.099	282.748	298.004	15	47	73	113	157	97	10	11	31	54	10	43	88	102	169	61	26	9	30	25	517.311
lin-13	WBGene00003002	C03B8.4	252.584	222.678	266.961	7	15	43	49	59	54	5	8	10	19	12	13	26	42	73	24	7	7	14	5	1167.5
isw-1	WBGene00002169	F37A4.8	242.324	255.764	294.401	16	52	54	123	156	103	17	12	27	69	17	57	65	62	125	50	27	16	23	11	703.264
hmg-12	WBGene00001977	Y17G7A.1	232.339	246.834	244.384	35	183	257	303	362	218	29	47	88	187	67	94	179	219	238	99	62	22	97	63	276.018
nfyc-1	WBGene00017742	F23F1.1	228.689	284.354	309.292	7	24	61	97	99	107	14	15	19	60	11	21	37	43	45	42	21	9	21	10	37.3009
mel-28	WBGene00003210	C38D4.3	224.42	204.689	235.437	7	40	44	64	73	50	8	7	11	21	13	17	47	40	72	37	10	3	9	12	1317.22
lmn-1	WBGene00003052	DY3.2	218.291	212.848	238.199	50	134	209	253	329	240	35	41	85	144	46	93	122	174	218	110	64	43	71	47	195.134
nfx-1	WBGene00007048	C16A3.7	215.95	192.161	242.762	20	57	92	184	173	160	18	34	63	105	22	56	96	125	172	53	59	24	49	37	713.331
Y111B2A.10	WBGene00013734	Y111B2A.10	210.854	199.806	220.966	2	9	9	15	22	10	0	0	1	1	1	6	7	2	14	12	5	1	3	1	92.77
pbrm-1	WBGene00007042	C26C6.1	207.067	208.479	225.589	15	58	78	149	200	151	23	28	51	127	12	43	90	76	160	85	45	32	41	39	526.011
znf-622	WBGene00015809	C16A3.4	194.534	188.242	250.328	61	174	191	261	302	175	31	26	57	70	48	74	145	220	195	74	32	33	19	14	168.914
hmg-1.1	WBGene00001971	Y48B6A.14	194.396	194.602	205.895	94	317	375	347	491	391	76	98	157	322	126	169	274	265	313	210	173	94	145	83	527.796
cdc-5L	WBGene00008386	D1081.8	190.884	180.468	215.262	12	46	73	105	132	83	15	14	28	61	29	49	72	103	111	47	34	26	41	22	311.629
dnj-11	WBGene00001029	F38A5.13	171.947	179.697	197.428	23	76	138	156	149	118	10	26	44	94	24	45	85	126	130	70	47	26	46	19	495.372
ztf-18	WBGene00020763	T24C4.7	171.947	218.373	223.008	1	15	13	25	36	27	2	5	5	14	2	5	14	17	30	14	6	4	10	6	289.022
eor-1	WBGene00001324	R11E3.6	171.672	210.15	191.964	1	7	16	24	28	22	5	3	7	10	4	12	18	10	29	9	10	2	7	5	297.761
swsn-7	WBGene00007433	C08B11.3	168.711	178.348	165.244	10	44	74	119	145	120	13	30	50	84	11	28	66	83	135	91	46	47	39	27	484.758
zfp-2	WBGene00009448	F35H8.3	159.415	181.624	191.604	3	12	39	45	76	49	10	6	14	54	4	17	20	30	48	34	13	6	9	5	87.8325
F23B12.7	WBGene00009084	F23B12.7	159.346	129.456	167.586	12	60	108	102	50	32	9	12	25	44	16	25	46	55	61	37	22	22	37	14	269.706
B0035.1	WBGene00007105	B0035.1	153.63	158.303	140.986	18	52	82	120	137	94	18	10	39	82	20	40	64	68	97	84	34	13	22	16	126.392
hmp-2	WBGene00001979	K05C4.6	153.355	163.186	151.734	7	13	50	68	110	77	10	7	23	58	4	18	33	40	67	55	22	19	15	12	33.9839
attf-2	WBGene00017317	F09G2.9	148.397	140.507	158.459	32	101	164	182	250	147	22	29	55	125	25	65	94	126	150	75	33	37	50	41	422.12
mep-1	WBGene00003218	M04B2.1	145.987	140.828	155.877	7	28	35	64	71	49	6	7	9	23	5	18	26	42	80	36	15	7	3	9	458.27
egl-27	WBGene00001194	C04A2.3	137.792	134.467	157.318	12	49	50	72	143	159	29	29	40	90	17	20	36	72	157	64	39	23	39	36	178.444
ceh-92	WBGene00013431	Y66D12A.5	133.178	126.951	202.412	3	15	14	16	16	7	2	0	2	3	4	1	8	19	18	9	2	1	4	2	119.77
F33H1.4	WBGene00009365	F33H1.4	132.903	164.214	138.404	1	11	18	30	33	24	4	6	6	15	2	9	9	15	42	19	10	3	7	3	549.853
lsy-27	WBGene00009834	F47H4.1	132.559	143.076	151.314	0	0	0	0	0	20	1	0	3	2	0	0	0	0	4	3	1	1	4	3	0.07942
hmg-4	WBGene00001974	T20B12.8	129.529	133.697	117.688	7	23	56	75	116	95	14	21	26	87	5	11	43	43	100	71	37	35	38	29	417.289
cey-1	WBGene00000472	F33A8.3	126.843	123.546	123.933	48	142	158	174	192	157	23	27	64	133	62	83	108	146	162	101	73	50	44	31	503.105
F57C9.4	WBGene00019011	F57C9.4	125.948	146.353	140.806	3	21	32	61	50	44	3	3	9	20	4	12	12	22	33	20	11	4	7	3	268.591
cid-1	WBGene00019629	K10D2.3	122.16	110.953	156.718	3	10	21	26	30	17	1	3	5	9	10	7	12	27	36	15	8	4	1	1	340.365
atf-7	WBGene00000223	C07G2.2	120.026	111.146	118.109	13	42	72	67	88	67	4	17	26	47	6	30	39	52	90	34	19	10	25	13	362.424
Y67H2A.10	WBGene00013465	Y67H2A.10	114.241	99.068	114.146	2	2	9	4	10	12	4	3	2	9	1	1	12	10	11	7	7	4	2	6	232.268
lin-40	WBGene00003025	T27C4.4	113.966	102.28	126.635	15	79	143	160	182	186	25	45	33	132	9	49	93	133	132	132	79	47	73	43	213.524
row-1	WBGene00009508	F37D6.2	103.017	110.118	118.709	5	9	27	48	57	50	8	9	10	40	7	6	16	17	47	18	11	7	13	10	149.176
Y57A10A.31	WBGene00013270	Y57A10A.31	101.364	96.241	102.017	0	1	0	0	2	0	0	0	0	0	0	0	2	3	0	2	0	0	0	0	197.695
C52E12.1	WBGene00016888	C52E12.1	101.02	86.347	95.292	9	35	51	54	74	41	7	8	25	42	7	13	24	42	70	46	15	6	20	5	313.006
snpc-4	WBGene00001568	F32H2.1	100.538	94.956	105.739	5	37	40	43	64	50	2	7	16	21	19	21	30	46	49	31	9	9	19	7	379.415
Y79H2A.3	WBGene00013580	Y79H2A.3	100.331	98.747	123.032	4	17	20	24	26	16	4	3	3	24	12	8	19	25	38	18	12	5	6	7	551.262
lsl-1	WBGene00009937	F52F12.4	99.78	86.861	103.458	19	47	53	65	85	46	3	7	22	36	11	23	34	48	45	24	13	7	6	7	75.5063
madf-8	WBGene00008118	C46F11.3	99.092	116.8	146.69	1	5	16	25	36	10	1	1	1	12	3	9	16	14	25	2	9	3	4	0	70.3658
attf-6	WBGene00012474	Y18D10A.1	97.99	85.126	90.248	15	46	52	63	61	40	7	10	13	30	10	14	28	54	61	36	18	9	13	11	1016.55
cdc-14	WBGene00000383	C17G10.4	97.715	100.802	80.881	36	74	99	161	190	116	20	25	50	101	19	40	83	85	121	68	36	32	45	27	403.385
him-17	WBGene00001874	T09E8.2	95.649	100.545	111.564	9	27	39	62	75	58	10	4	14	33	3	13	44	52	57	47	13	11	16	9	254.261
F26F4.8	WBGene00005011	F26F4.8	93.789	114.551	149.152	1	2	5	2	2	10	2	0	0	2	0	1	2	4	6	4	2	0	0	0	56.0058
ztf-8	WBGene00022598	ZC395.8	92.825	91.808	111.444	10	29	43	78	83	67	11	9	27	48	6	22	36	55	48	37	30	20	16	9	260.585
let-526	WBGene00002717	C01G8.9	91.242	89.688	97.874	0	0	3	1	2	4	0	0	1	1	0	1	0	3	2	1	0	1	0	0	451.578
ztf-15	WBGene00011066	R06C7.9	85.32	93.607	118.769	5	18	25	41	48	33	0	3	6	18	7	6	21	19	41	13	4	3	4	6	206.336
flh-1	WBGene00012435	Y11D7A.12	85.251	82.299	95.412	1	18	32	56	87	61	7	17	23	50	5	13	24	19	61	25	4	16	14	5	154.871
lir-1	WBGene00003044	F18A1.3	85.182	103.051	99.735	1	4	12	21	14	13	3	1	7	5	3	4	7	10	7	5	2	1	3	0	47.2681
mbf-1	WBGene00003148	H21P03.1	82.978	77.031	71.093	23	83	104	125	137	96	7	17	33	54	30	40	71	182	112	52	24	11	30	20	114.292
F56D1.1	WBGene00018959	F56D1.1	81.601	114.808	128.977	1	9	22	28	34	30	1	0	7	16	5	4	8	12	30	9	10	2	10	2	131.899
ztf-25	WBGene00012405	Y6G8.3	80.775	72.277	81.481	0	0	1	1	3	32	2	3	9	16	0	0	0	0	13	13	4	3	6	8	0
mcd-1	WBGene00013096	Y51H1A.6	80.499	88.596	79.98	2	11	21	19	26	10	4	3	5	14	6	7	11	22	20	13	2	5	9	5	140.381
ceh-44	WBGene00000464	Y54F10AM.4	80.293	79.216	89.467	8	27	42	51	51	59	8	16	15	27	12	12	19	36	69	44	14	17	19	11	293.413
lin-54	WBGene00003037	JC8.6	77.676	78.445	83.463	7	32	50	89	125	115	14	12	26	58	16	34	50	64	91	34	23	7	23	4	137.692
tra-4	WBGene00018740	F53B3.1	77.676	93.157	91.989	0	2	0	0	0	9	3	1	8	12	0	0	0	0	2	8	2	1	2	0	0.564439
ceh-100	WBGene00012584	Y38E10A.6	74.646	70.542	83.162	5	21	27	34	30	17	4	2	10	11	12	5	21	40	40	17	9	1	11	10	863.735
W04D2.4	WBGene00012243	W04D2.4	73.475	73.369	71.694	6	15	28	56	53	50	5	11	7	41	6	12	38	29	48	19	14	7	9	6	217.897
ubxn-1	WBGene00017733	F23C8.4	73.131	75.939	70.673	13	53	107	172	239	165	21	29	75	127	17	45	75	119	173	93	60	40	43	45	81.8287
hmg-1.2	WBGene00001972	F47D12.4	72.856	84.677	83.763	12	43	59	79	150	101	12	18	35	68	11	17	45	66	95	37	22	14	17	17	69.1065
dpl-1	WBGene00001061	T23G7.1	72.511	70.992	89.347	6	23	40	57	87	56	8	10	24	62	13	10	31	46	57	36	8	11	12	13	177.883
ztf-4	WBGene00020399	T10B11.3	70.927	67.009	71.394	8	36	35	53	70	45	8	7	23	37	5	13	19	40	31	24	9	13	6	7	47.0633
zip-4	WBGene00021552	Y44E3B.1	70.514	73.048	98.474	8	49	55	113	150	109	13	7	23	47	9	18	45	64	108	62	24	9	18	4	122.782
W02D7.6	WBGene00020942	W02D7.6	69.481	77.738	88.867	0	4	4	18	21	12	3	1	6	4	2	9	8	14	11	6	4	1	2	1	42.5257
lag-1	WBGene00002245	K08B4.1	68.586	62.383	63.468	15	17	43	33	52	46	8	8	13	31	1	10	20	22	48	29	10	6	15	7	166.574
hinf-1	WBGene00009553	F39B2.1	67.966	65.017	58.424	0	0	4	3	3	0	0	0	0	1	1	0	0	0	3	2	0	1	0	0	81.5311
rbr-2	WBGene00004319	ZK593.4	67.898	71.121	67.13	12	45	43	77	100	84	18	23	30	71	8	24	41	30	95	57	34	33	33	25	482.882
wrm-1	WBGene00006943	B0336.1	67.76	65.852	74.276	7	27	53	81	107	77	6	5	13	17	11	20	51	46	98	49	33	16	24	6	117.604
pal-1	WBGene00003912	C38D4.6	67.691	87.568	77.458	6	17	45	86	145	116	11	9	30	71	6	15	33	35	53	26	15	15	15	6	70.7168
eea-1	WBGene00011696	T10G3.5	66.796	68.808	72.534	10	17	36	56	46	43	7	8	12	15	3	14	25	36	61	22	11	5	6	2	813.135
cep-1	WBGene00000467	F52B5.5	65.969	76.774	87.246	4	14	19	28	31	29	4	7	14	13	3	12	12	7	27	9	8	7	3	5	190.987
ceh-83	WBGene00018446	F45C12.15	65.556	90.395	61.967	0	0	0	0	0	19	3	0	9	20	0	0	0	0	3	12	3	3	9	5	0.12175
C27A12.2	WBGene00016154	C27A12.2	65.281	72.213	70.853	0	13	24	35	33	31	3	3	4	9	6	5	13	23	24	9	8	5	8	4	251.104
F44E2.7	WBGene00018420	F44E2.7	65.143	76.453	92.65	6	39	74	71	87	61	11	12	19	53	9	23	50	65	82	42	22	10	18	15	318.158
athp-2	WBGene00019217	H20J04.2	64.936	63.283	83.583	5	20	23	29	42	25	7	4	12	20	4	13	27	24	45	31	15	5	11	12	354.053
vep-1	WBGene00015091	B0261.1	64.179	59.621	62.207	4	20	22	28	42	21	0	2	6	26	5	5	18	27	29	26	6	3	13	6	299.438
hmg-5	WBGene00001975	F45E4.9	62.939	70.028	84.544	12	48	46	73	71	56	5	9	16	44	9	19	40	75	44	23	24	14	18	17	75.1472
nhr-49	WBGene00003639	K10C3.6	62.113	57.115	68.812	5	18	57	59	75	69	4	5	32	45	5	13	30	32	64	38	21	12	17	13	60.3115
athp-1	WBGene00008081	C44B9.4	60.736	67.523	66.59	0	15	23	26	24	24	3	7	8	15	11	10	16	29	28	18	8	4	5	4	233.647
rcor-1	WBGene00022278	Y74C9A.4	60.529	57.95	67.13	3	24	40	46	61	37	3	4	12	37	11	9	20	39	58	34	12	7	16	11	283.555
madf-6	WBGene00016930	C54G6.1	59.91	64.439	77.338	5	15	20	14	17	8	1	2	4	8	3	5	5	16	21	5	5	1	6	0	39.9654
D1046.2	WBGene00008363	D1046.2	59.634	80.244	69.412	3	5	9	18	25	17	3	6	2	9	1	3	16	13	20	12	6	0	9	2	72.4834
tbp-1	WBGene00006542	T20B12.2	58.395	58.271	70.073	6	38	38	75	82	82	9	8	21	44	17	17	31	27	47	28	14	7	9	7	29.3069
Y48G8AL.10	WBGene00021689	Y48G8AL.10	58.257	57.372	60.766	0	1	1	2	1	0	0	0	0	0	0	2	0	0	0	1	0	0	0	0	131.17
spr-4	WBGene00005009	C09H6.1	57.637	55.894	71.454	0	11	28	40	54	46	6	5	12	18	4	3	20	32	37	31	17	19	25	5	170.301
R02D3.7	WBGene00019824	R02D3.7	56.88	62.769	58.904	1	25	28	63	73	77	7	5	25	53	4	10	27	18	39	37	7	7	7	7	154.428
madf-11	WBGene00015468	C05D2.6	56.535	56.601	53.921	4	10	26	28	29	41	6	6	6	28	2	6	15	14	29	12	7	4	5	3	160.653
F58G1.2	WBGene00010264	F58G1.2	56.398	45.551	55.782	6	30	43	77	102	58	6	5	20	50	12	24	39	25	80	23	12	10	12	3	73.7103
pzf-1	WBGene00011505	T05G11.1	56.191	65.917	61.006	0	0	0	1	0	30	3	6	4	22	0	0	0	1	15	21	7	2	8	7	0.137946
nhr-66	WBGene00003656	T09A12.4	56.122	54.417	60.285	3	11	23	38	39	26	3	9	12	35	8	7	19	31	41	30	19	4	13	6	200.912
chd-7	WBGene00007053	T04D1.4	55.847	54.802	62.387	0	0	5	1	2	20	6	3	5	15	1	0	2	2	9	13	11	4	7	8	17.2582
ceh-38	WBGene00000459	F22D3.1	55.296	57.95	65.689	9	26	56	76	112	98	13	25	32	85	8	36	43	42	88	65	35	40	39	32	137.284
daf-16	WBGene00000912	R13H8.1	54.745	55.316	60.586	5	26	33	43	36	35	6	7	8	28	12	17	22	41	65	40	19	26	16	13	177.418
repo-1	WBGene00008683	F11A10.2	54.676	63.861	65.93	11	21	48	44	65	35	4	5	13	24	3	18	17	30	33	15	5	6	7	6	34.831
drap-1	WBGene00009584	F40F9.7	54.607	57.757	51.038	7	23	35	44	71	75	13	18	21	69	8	14	21	45	67	64	18	22	26	12	92.6037
ztf-3	WBGene00016905	C53D5.4	54.263	65.595	42.452	0	2	3	8	10	10	6	1	7	16	0	1	1	7	9	8	7	1	6	7	10.5106
lin-36	WBGene00003021	F44B9.6	53.781	46.45	51.999	6	23	47	65	91	49	5	12	14	25	12	21	32	64	94	54	25	24	18	10	633.85
F52B5.7	WBGene00009923	F52B5.7	51.233	75.939	50.558	0	1	0	0	1	4	0	2	1	7	0	0	2	0	2	4	2	3	5	0	2.956
Y5F2A.4	WBGene00012385	Y5F2A.4	51.233	53.389	56.683	2	10	16	31	45	36	0	1	11	33	1	3	10	5	19	8	3	2	2	1	83.9096
mxl-2	WBGene00003510	F40G9.11	50.682	46.964	52.78	2	32	58	68	83	51	3	16	18	56	3	7	42	51	61	33	16	8	10	7	33.4384
R151.8	WBGene00020111	R151.8	50.613	48.57	57.403	6	29	39	71	63	42	4	5	21	25	6	16	42	48	68	35	11	16	19	8	195.663
F37B4.10	WBGene00018140	F37B4.10	50.476	68.101	48.697	0	0	0	0	0	4	0	1	1	7	0	0	0	0	2	10	3	3	1	2	0.61756
ada-2	WBGene00017967	F32A5.1	49.167	57.115	58.664	9	34	40	69	105	79	8	10	12	24	15	28	45	50	83	48	20	12	17	6	250.846
T26A5.8	WBGene00020823	T26A5.8	49.167	58.271	65.99	5	27	38	71	74	47	5	9	15	25	10	16	39	36	48	29	9	9	12	10	28.8236
R144.3	WBGene00020093	R144.3	47.721	65.21	46.535	3	18	19	44	44	30	1	4	8	15	4	14	18	25	33	8	4	5	2	0	38.9371
ekl-4	WBGene00013676	Y105E8A.17	47.514	43.109	52.6	16	29	38	37	59	29	5	3	12	28	5	17	29	34	40	27	8	7	9	5	188.792
nfi-1	WBGene00003592	ZK1290.4	47.446	42.66	46.235	3	3	14	23	26	16	3	4	5	12	6	6	10	23	28	9	3	8	2	4	194.806
zim-3	WBGene00011601	T07G12.11	46.895	43.944	47.856	2	15	14	7	26	17	2	2	6	5	4	7	12	16	10	6	5	7	2	1	134.799
zim-1	WBGene00011597	T07G12.6	44.485	46.836	49.057	1	12	32	43	51	46	5	6	11	32	3	14	19	16	47	12	13	8	9	4	173.562
him-8	WBGene00001867	T07G12.12	44.416	55.059	51.759	3	15	24	34	30	20	1	2	8	20	1	12	8	18	23	11	5	2	3	2	94.8519
duxl-1	WBGene00022554	ZC204.2	44.278	59.621	49.958	0	0	2	0	0	21	3	2	4	16	0	0	0	0	2	25	7	6	6	5	29.7806
spr-1	WBGene00005006	D1014.8	43.589	48.827	48.336	3	20	27	53	48	29	5	6	10	10	7	11	24	24	25	15	12	1	4	1	241.345
let-391	WBGene00006492	C27A12.3	43.521	57.822	41.191	1	9	23	24	31	20	1	4	4	8	3	2	10	13	12	13	0	1	2	2	104.614
nhr-46	WBGene00003636	C45E5.6	42.419	38.034	47.856	0	1	0	1	1	19	4	4	8	21	0	0	0	1	7	11	8	5	6	2	1.83633
mxl-1	WBGene00003509	T19B10.11	42.35	50.369	63.227	6	13	35	65	62	60	4	8	14	46	0	12	27	20	37	20	6	4	6	1	19.8513
atfs-1	WBGene00013878	ZC376.7	40.284	49.919	40.47	3	15	24	39	47	34	3	5	10	32	4	14	11	11	40	24	12	7	7	3	48.3662
lin-15B	WBGene00023497	ZK662.4	39.871	35.4	45.514	0	0	6	0	12	64	8	8	20	32	0	1	2	0	23	16	16	4	16	5	6.71068
myrf-2	WBGene00008999	F21A10.2	39.389	39.254	55.121	0	0	2	1	0	7	2	0	1	10	0	0	0	0	2	5	4	3	8	8	2.77372
crh-2	WBGene00016162	C27D6.4	37.943	36.556	41.851	4	14	16	34	51	53	11	9	16	35	0	6	20	16	40	35	9	11	18	7	100.722
pqn-21	WBGene00004111	C37A2.5	36.703	33.151	30.863	0	3	2	8	8	34	8	3	7	19	0	3	2	9	20	25	8	11	9	3	143.348
C01F6.9	WBGene00007223	C01F6.9	36.29	34.886	44.914	24	90	88	100	108	63	12	15	38	54	38	30	80	138	84	41	21	7	14	2	69.7287
dnj-17	WBGene00001035	T03F6.2	34.431	32.123	34.886	3	16	29	52	40	25	8	5	15	16	7	16	24	26	32	16	14	8	10	8	281.441
nhr-23	WBGene00003622	C01H6.5	33.811	27.176	30.143	1	1	1	5	6	2	1	0	1	3	0	2	1	3	2	1	1	0	1	1	134.821
nfyb-1	WBGene00021132	W10D9.4	33.26	32.38	35.907	12	24	43	71	82	73	11	11	24	56	9	26	24	40	58	40	16	21	18	10	104.803
ztf-17	WBGene00011639	T09A5.12	33.191	31.802	40.35	6	15	19	24	44	27	2	6	9	29	6	14	17	25	30	17	12	3	6	7	151.226
Y73E7A.1	WBGene00022268	Y73E7A.1	32.365	34.95	37.708	21	81	83	104	141	71	8	8	17	47	23	25	57	131	114	64	30	20	22	13	48.8486
gei-8	WBGene00001565	C14B9.6	31.263	28.718	32.424	0	0	0	0	0	14	0	1	1	5	0	0	0	0	8	7	6	2	1	3	8.85183
arid-1	WBGene00044689	Y108G3AL.7	31.263	29.746	30.383	0	6	7	6	9	8	0	1	1	4	0	0	4	4	12	3	3	1	4	0	299.323
zim-2	WBGene00011600	T07G12.10	31.125	31.545	48.276	2	10	22	20	20	16	0	5	4	7	1	9	17	11	15	4	1	1	2	1	121.008
nhr-86	WBGene00003676	Y40B10A.8	30.437	28.268	32.424	2	18	26	23	34	25	1	1	7	33	2	8	18	17	35	12	10	1	9	5	113.635
tlf-1	WBGene00006577	F39H11.2	29.955	25.763	31.344	2	3	7	11	14	10	3	0	6	10	2	5	5	10	11	5	3	4	6	2	144.841
snu-23	WBGene00022794	ZK686.4	29.748	32.637	36.688	4	28	44	50	62	58	9	11	11	32	5	12	30	53	45	45	16	12	21	7	168.818
T07F8.4	WBGene00020320	T07F8.4	29.335	32.509	31.284	13	40	76	100	180	110	21	11	37	76	16	30	60	55	100	52	25	20	26	11	15.2857
nhr-71	WBGene00003661	K11E4.5	28.784	26.277	27.321	0	0	0	0	0	12	4	2	7	20	0	0	0	0	6	8	4	5	5	4	0.226711
aptf-3	WBGene00009203	F28C6.2	27.682	25.955	23.718	2	12	32	42	54	46	5	7	6	8	5	8	30	24	41	13	8	2	10	2	114.009
efl-1	WBGene00001161	Y102A5C.18	26.787	27.626	28.041	2	15	14	25	30	30	1	5	7	18	5	10	12	17	25	7	11	4	3	4	101.349
dxbp-1	WBGene00013128	Y52B11A.9	26.443	28.461	34.226	1	5	21	25	27	20	2	0	13	19	3	7	16	13	29	16	2	4	6	6	201.041
cebp-2	WBGene00016754	C48E7.11	26.099	29.553	30.743	10	17	25	37	27	32	8	3	17	34	12	15	12	20	48	26	12	2	9	6	24.084
Y56A3A.18	WBGene00013236	Y56A3A.18	26.03	28.911	34.766	11	22	24	40	34	15	2	2	5	11	7	7	14	25	17	9	4	2	1	0	43.1954
gfl-1	WBGene00001585	M04B2.3	25.961	37.777	33.925	4	11	23	33	35	43	8	6	9	35	2	7	25	20	37	25	14	9	6	2	29.6167
hif-1	WBGene00001851	F38A6.3	25.892	26.855	29.782	0	1	2	0	1	18	5	3	9	16	0	0	3	0	9	16	9	6	7	9	0.886191
spe-44	WBGene00007732	C25G4.4	25.823	27.24	35.066	5	9	6	8	19	13	2	1	2	12	1	4	9	3	11	5	4	1	5	2	56.9889
nhr-47	WBGene00003637	C24G6.4	25.754	24.863	20.716	0	1	0	1	0	5	0	1	1	5	0	0	0	0	0	0	2	0	0	0	8.45168
ztf-1	WBGene00018833	F54F2.5	25.548	24.671	26.42	2	16	39	41	68	43	1	6	7	19	3	14	19	36	38	18	7	5	4	3	299.438
nhr-13	WBGene00003612	Y5H2B.2	25.479	17.346	11.529	0	1	0	0	0	17	2	3	3	8	0	0	0	0	3	8	3	1	2	2	1.55567
miz-1	WBGene00011259	R13.1	25.066	25.185	21.556	0	1	0	0	0	16	4	0	3	15	0	0	0	1	1	7	4	2	3	1	3.32712
zip-11	WBGene00021082	W08E12.1	24.308	24.285	23.658	4	4	12	5	16	1	0	0	3	2	5	2	1	5	9	2	1	1	2	2	17.9798
lsy-2	WBGene00003087	F49H12.1	24.033	21.844	24.258	0	1	0	0	5	39	9	2	15	18	1	0	0	0	17	20	6	5	7	2	3.3717
dpy-27	WBGene00001086	R13G10.1	23.62	27.24	28.041	1	0	4	1	0	15	3	1	9	14	0	0	0	1	6	11	6	4	11	5	8.40362
sma-9	WBGene00004862	T05A10.1	23.551	23.257	21.256	0	0	2	1	0	8	1	4	3	8	0	0	0	0	3	7	0	4	3	6	3.70384
slr-2	WBGene00013350	Y59A8B.13	22.793	23.193	22.037	2	3	9	9	17	6	0	3	2	6	4	4	9	8	11	6	2	2	0	3	109.12
rabs-5	WBGene00021538	Y42H9AR.3	22.518	28.975	23.958	0	4	4	11	15	3	0	0	3	2	1	3	10	8	12	2	0	1	1	0	95.6075
die-1	WBGene00000995	C18D1.1	21.623	20.623	20.595	0	0	0	0	0	15	6	0	7	9	0	0	1	1	14	12	6	2	7	3	2.54721
flh-3	WBGene00012436	Y11D7A.13	21.485	24.285	20.055	0	0	1	0	0	7	1	2	3	8	0	0	0	0	2	8	1	3	3	3	0.21306
ceh-39	WBGene00000460	T26C11.7	21.072	21.201	22.037	0	0	0	0	0	18	2	7	4	16	0	0	0	0	5	18	6	3	3	1	8.73977
tbx-36	WBGene00006555	ZK829.5	20.59	28.011	21.196	0	0	0	0	4	13	0	4	7	17	0	0	0	0	4	5	2	1	2	0	0
sdc-1	WBGene00004745	F52E10.1	19.832	25.377	27.441	0	0	0	0	0	10	1	6	2	1	0	0	0	0	2	4	1	5	3	3	2.23181
nfya-2	WBGene00043056	Y53H1A.5	19.832	21.266	21.916	3	18	20	62	78	42	10	6	18	43	6	18	22	34	38	23	10	9	9	3	36.0897
atf-5	WBGene00000221	T04C10.4	19.488	18.76	20.475	0	0	1	1	2	2	0	0	1	0	0	0	0	0	0	2	1	0	3	4	0.519616
unc-98	WBGene00006827	F08C6.7	19.006	19.21	17.113	0	0	1	0	1	0	0	0	0	0	0	0	0	0	0	0	0	0	0	3	1.23545
hlh-2	WBGene00001949	M05B5.5	18.111	19.402	15.131	0	0	3	0	1	24	2	8	14	31	1	0	0	0	10	12	6	7	12	9	0.429386
lir-2	WBGene00003045	F18A1.4	17.835	23.321	28.642	0	2	12	14	8	5	0	0	4	2	3	4	9	5	9	6	0	0	0	1	70.2568
T20F7.1	WBGene00020630	T20F7.1	17.835	12.849	21.136	0	1	1	1	4	11	2	1	3	10	0	0	0	1	4	6	4	2	6	2	7.26617
C04F5.9	WBGene00015451	C04F5.9	17.353	19.595	23.658	2	2	4	17	20	20	1	4	3	5	2	1	6	10	16	7	5	1	2	3	115.94
spr-3	WBGene00005008	C07A12.5	17.009	16.19	19.094	0	0	0	1	0	15	1	0	6	17	0	0	0	0	0	14	2	2	10	4	0.172134
aptf-2	WBGene00013383	Y62E10A.17	17.009	17.539	18.314	2	1	0	0	7	26	3	0	4	15	0	0	0	0	5	6	8	0	2	0	3.58364
B0336.7	WBGene00015147	B0336.7	16.871	15.612	19.154	9	14	19	41	43	41	7	2	14	20	8	20	13	23	23	17	10	5	5	5	112.505
swsn-1	WBGene00004203	Y113G7B.23	16.458	20.88	22.517	16	63	83	112	132	99	15	22	30	71	15	30	50	85	98	56	33	13	40	36	302.78
nhr-34	WBGene00003627	F58G6.5	15.287	18.439	16.873	0	0	0	1	0	6	2	1	2	12	0	0	0	1	0	4	3	2	0	6	0.925426
nhr-256	WBGene00022805	ZK697.2	15.15	16.447	14.411	0	0	0	0	0	3	3	1	3	4	0	0	0	0	4	4	0	0	0	0	0.561758
sea-2	WBGene00004751	K10G6.3	14.53	16.126	17.593	0	0	2	3	32	38	2	4	4	10	0	2	2	7	31	15	7	2	8	4	21.8371
ceh-21	WBGene00000444	T26C11.6	14.392	18.953	16.753	0	0	3	2	0	18	3	6	6	9	0	0	0	0	2	16	7	4	9	6	1.20092
Y53F4B.3	WBGene00013150	Y53F4B.3	13.841	15.869	14.291	15	14	23	33	52	39	7	2	9	28	6	9	30	33	31	25	14	6	12	8	54.5939
Y48C3A.12	WBGene00012994	Y48C3A.12	13.703	15.226	8.526	0	2	1	3	1	4	0	0	0	3	0	0	2	5	4	3	1	3	0	0	56.3175
nhr-48	WBGene00003638	ZK662.3	13.566	10.665	13.63	0	0	0	0	0	0	2	0	1	0	0	0	0	0	0	2	0	1	0	0	0.315565
flh-2	WBGene00016138	C26E6.2	13.359	14.263	13.63	0	3	4	8	1	57	13	5	14	49	0	1	2	2	21	25	20	21	16	5	4.12299
nhr-61	WBGene00003651	W01D2.2	13.221	16.961	16.032	0	0	0	0	0	6	2	0	0	1	1	0	0	0	4	1	0	0	2	1	19.6554
nhr-228	WBGene00020852	T27B7.6	12.877	15.355	9.127	0	0	0	0	0	5	1	0	0	2	0	1	0	0	0	1	3	0	1	0	0.220972
swsn-3	WBGene00022182	Y71H2AM.17	12.877	14.905	10.568	1	1	0	0	7	3	0	0	0	0	0	2	1	7	4	3	2	4	0	1	253.962
nhr-122	WBGene00003712	Y41D4B.9	12.739	14.841	14.051	0	0	1	0	0	5	2	2	3	6	0	0	0	0	0	8	3	0	1	1	0.484276
hmg-20	WBGene00012209	W02D9.3	12.602	13.299	16.693	4	17	33	57	76	56	1	4	9	40	3	11	23	36	52	27	14	5	8	5	73.0835
ztf-28	WBGene00018099	F36F12.8	12.602	13.684	19.335	2	8	20	22	31	16	2	3	6	17	3	8	8	17	14	6	6	2	0	1	15.5742
R05D3.3	WBGene00019878	R05D3.3	12.533	4.369	9.727	1	9	11	8	8	3	0	0	0	0	0	3	5	2	6	1	3	1	0	0	46.3744
tbx-9	WBGene00006546	T07C4.6	12.395	14.263	12.429	0	0	2	0	7	36	1	5	5	29	1	0	0	0	19	19	11	4	9	2	0
egl-18	WBGene00001186	F55A8.1	12.326	14.198	9.187	0	0	1	0	0	5	2	0	1	5	0	0	0	0	4	2	1	1	0	1	1.56884
zip-2	WBGene00019327	K02F3.4	12.189	8.224	6.545	0	0	2	3	3	21	6	1	2	0	0	0	0	0	6	13	2	1	0	0	2.03201
F41H10.4	WBGene00018317	F41H10.4	12.051	13.106	18.254	4	6	20	22	28	18	0	7	3	11	2	10	7	10	15	15	9	3	7	2	209.18
K09H9.7	WBGene00019598	K09H9.7	11.913	6.168	23.057	53	140	192	247	334	177	17	28	39	54	61	78	112	234	204	95	40	32	31	19	24.2616
ceh-49	WBGene00017538	F17A9.6	11.775	12.721	11.949	0	0	0	0	1	23	5	0	7	12	0	0	0	0	5	12	4	1	1	2	0.155692
ceh-91	WBGene00013425	Y66A7A.5	11.293	11.821	16.452	1	4	2	6	13	9	1	0	2	3	3	5	7	7	4	2	0	1	1	1	141.275
bed-1	WBGene00012674	Y39B6A.12	11.224	10.729	11.889	0	4	9	8	9	6	0	2	5	2	0	2	6	6	10	5	1	3	0	2	40.3009
ztf-9	WBGene00013966	ZK287.6	11.018	15.997	17.173	1	4	7	31	36	28	7	3	7	4	1	7	10	6	9	6	1	0	7	3	29.35
attf-4	WBGene00015477	C05D10.1	11.018	12.785	10.988	0	0	0	0	0	3	0	4	2	8	0	1	0	0	0	1	7	1	3	5	1.24262
sea-1	WBGene00004750	F19B10.9	10.88	12.721	11.108	0	0	0	1	0	6	5	2	3	20	0	0	0	0	3	8	14	7	6	1	0
dmd-6	WBGene00007058	F13G11.1	10.88	8.737	8.346	1	1	3	0	1	39	13	12	8	47	1	0	1	0	10	32	14	21	19	15	1.34359
zfh-2	WBGene00022518	ZC123.3	10.742	9.765	10.148	0	0	1	0	0	0	0	0	0	0	0	0	0	0	2	1	0	0	0	0	3.13871
sbp-1	WBGene00004735	Y47D3B.7	10.605	9.316	11.829	0	0	0	0	0	3	0	0	0	2	0	0	0	0	0	5	2	0	1	0	2.21733
nfya-1	WBGene00011614	T08D10.1	10.467	12.4	9.727	0	0	0	0	0	10	5	2	5	12	0	1	0	0	4	6	5	5	3	3	0.222958
C46E10.9	WBGene00016713	C46E10.9	10.467	8.481	13.93	0	0	0	0	0	7	0	0	0	0	0	0	0	0	2	0	0	0	0	0	0.0241177
nhr-12	WBGene00003611	R04B5.4	10.398	9.573	9.307	0	1	0	0	0	10	1	1	6	12	0	0	0	0	2	8	2	2	2	1	0.351307
mml-1	WBGene00003378	T20B12.6	10.192	9.958	8.947	0	0	0	0	0	5	2	0	0	9	0	0	0	0	0	2	2	2	1	1	5.55593
taf-11.3	WBGene00006395	F43D9.5	10.192	13.235	11.529	2	13	15	19	20	13	0	4	10	12	3	5	8	19	16	2	7	2	5	2	25.9936
Y53H1A.2	WBGene00013178	Y53H1A.2	10.123	9.508	11.288	8	13	39	73	89	53	16	14	26	31	9	13	8	18	34	16	7	11	9	12	18.4331
daf-3	WBGene00000899	F25E2.5	10.054	9.765	9.307	0	0	0	0	0	7	2	2	0	6	0	0	0	0	0	4	1	0	1	0	1.67992
attf-5	WBGene00020214	T04G9.1	9.847	8.802	6.725	0	0	0	0	0	2	0	0	0	0	0	0	1	0	0	4	1	1	2	1	0.904305
myrf-1	WBGene00004134	F59B10.1	9.641	12.914	9.787	0	0	0	0	0	2	0	0	0	0	0	0	0	0	0	0	0	1	2	1	2.93118
camt-1	WBGene00020251	T05C1.4	9.434	8.352	8.646	0	0	0	0	0	4	1	2	1	8	0	0	0	0	0	5	5	0	2	1	0.62335
K11D12.12	WBGene00019651	K11D12.12	9.365	8.545	9.487	0	6	7	14	7	8	0	0	4	4	1	1	5	4	4	0	2	1	2	0	9.79146
nhr-20	WBGene00003619	F43C1.4	9.296	11.629	9.367	0	0	1	0	0	14	0	4	3	24	0	0	0	0	9	7	3	2	5	4	2.14089
C50F4.12	WBGene00008236	C50F4.12	9.296	13.042	17.713	5	14	25	31	45	13	2	5	4	20	4	14	22	15	36	5	4	4	8	4	71.9288
nhr-95	WBGene00003685	Y39B6A.17	8.952	12.528	9.367	0	0	0	0	0	3	0	0	1	1	0	1	0	0	0	1	1	0	0	0	7.65476
tra-1	WBGene00006604	Y47D3A.6	8.952	8.802	8.226	0	3	4	1	2	3	0	1	0	0	0	3	3	1	1	0	0	1	0	0	338.599
nhr-2	WBGene00003601	C32F10.6	8.883	10.151	9.187	0	0	1	0	0	1	3	4	9	16	0	0	0	0	1	7	5	2	4	2	2.48055
nhr-10	WBGene00003609	B0280.8	8.745	13.941	10.088	0	0	1	0	0	27	5	2	10	15	0	0	1	2	2	15	4	5	6	5	1.00067
sex-1	WBGene00004786	F44A6.2	8.745	12.207	10.508	0	1	2	0	0	5	8	7	6	33	0	0	0	0	0	16	10	6	7	7	0.302962
T23F11.4	WBGene00011956	T23F11.4	8.745	9.637	7.866	0	0	0	0	0	5	2	2	9	13	0	0	0	0	0	8	2	4	3	3	0.427577
C06A6.2	WBGene00015507	C06A6.2	8.745	6.874	5.344	0	0	1	0	0	4	2	0	2	7	0	0	0	0	2	6	3	1	2	2	2.43734
lst-5	WBGene00016890	C52E12.6	8.539	3.212	5.524	0	1	0	1	2	0	0	0	0	0	0	0	0	2	0	1	0	0	0	0	6.31822
nhr-138	WBGene00003728	C28D4.9	8.401	7.196	6.485	0	0	0	3	0	9	0	1	3	5	0	0	0	0	1	2	1	0	2	1	0.888594
lin-28	WBGene00003014	F02E9.2	8.332	7.26	5.224	7	17	23	22	49	24	2	8	16	16	2	6	8	11	23	11	4	2	5	2	61.3022
ceh-99	WBGene00044032	T21B4.17	8.332	11.05	13.81	0	0	0	0	0	4	1	0	0	3	0	0	0	0	2	7	0	1	0	1	0.213648
nhr-100	WBGene00003690	C28D4.1	8.195	8.352	6.545	0	0	1	0	0	4	2	2	0	3	0	0	0	0	0	3	0	0	3	0	0.223622
C46C2.7	WBGene00045078	C46C2.7	7.988	10.665	7.085	1	5	6	4	12	3	2	0	7	11	1	2	4	5	8	1	3	1	3	3	5.71321
T27A8.2	WBGene00012074	T27A8.2	7.85	12.143	5.824	0	0	0	0	0	13	2	2	8	19	0	0	0	0	13	12	7	3	6	7	0.181009
elt-1	WBGene00001249	W09C2.1	7.712	4.176	3.363	0	1	0	0	0	7	3	0	0	4	0	0	0	1	1	3	1	0	6	1	0.103459
egrh-1	WBGene00007772	C27C12.2	7.712	7.774	7.806	0	0	1	0	3	1	0	0	3	13	0	0	0	1	6	10	2	3	3	1	0.0915391
nhr-181	WBGene00018189	F38H12.3	7.712	7.131	8.346	0	0	0	0	0	21	1	3	4	15	0	0	0	0	9	8	7	4	3	2	0.0611695
hlh-30	WBGene00020930	W02C12.3	7.575	6.232	8.226	0	0	0	1	1	4	1	2	2	1	0	0	0	0	1	2	1	0	1	0	4.78948
aha-1	WBGene00000095	C25A1.11	7.299	6.039	6.545	0	1	0	0	0	4	7	2	8	12	0	0	0	0	2	11	7	5	2	4	2.35544
mdl-1	WBGene00003163	R03E9.1	7.299	8.866	8.526	0	0	1	0	0	3	0	0	0	1	0	0	0	2	1	0	6	0	1	2	2.34577
dmd-9	WBGene00022060	Y67D8A.3	7.024	10.793	14.351	0	3	0	3	10	10	1	3	5	9	0	1	0	1	4	8	1	0	1	0	26.3685
crh-1	WBGene00000793	Y41C4A.4	6.886	7.388	8.346	1	5	4	4	1	3	0	1	1	1	0	3	1	2	5	5	0	1	0	0	101.794
saeg-1	WBGene00010012	F53H10.2	6.266	5.846	10.148	4	10	7	5	2	6	0	0	4	6	4	1	1	4	8	8	0	3	3	4	40.3759
atf-6	WBGene00000222	F45E6.2	6.198	5.911	5.164	0	0	0	2	0	15	3	3	5	3	0	0	0	0	5	7	6	2	4	1	0.566694
Y56A3A.28	WBGene00013240	Y56A3A.28	6.198	4.626	7.566	0	1	7	3	3	5	0	1	1	1	2	1	3	10	2	1	0	0	0	0	123.417
nhr-104	WBGene00003694	R11E3.5	6.129	7.71	4.864	0	0	0	0	0	2	0	0	0	0	0	0	0	0	0	1	0	0	0	0	0.304457
ceh-82	WBGene00018433	F45C12.2	6.129	8.159	3.543	0	0	0	0	1	16	6	0	0	1	0	1	0	0	1	13	6	3	1	0	0.261507
ceh-93	WBGene00019864	R04A9.5	5.509	7.131	6.485	0	0	0	0	0	5	0	0	4	5	0	0	0	0	0	3	3	2	1	1	1.95257
ceh-40	WBGene00000461	F17A2.5	5.302	5.718	7.085	0	0	0	0	0	2	1	1	2	5	0	0	0	0	0	1	2	1	1	2	1.09025
nhr-21	WBGene00003620	F21D12.1	5.302	3.791	5.404	0	0	0	0	0	3	3	0	5	8	0	0	0	0	0	7	0	1	0	1	0.513997
ZC247.1	WBGene00013859	ZC247.1	5.302	2.377	3.242	1	1	0	2	0	1	0	1	0	0	0	0	0	2	0	7	1	1	1	1	8.03513
hnd-1	WBGene00001981	C44C10.8	5.233	6.36	11.349	0	0	1	0	0	0	0	0	0	4	0	0	0	0	0	0	1	0	0	0	0
F15A4.10	WBGene00008844	F15A4.10	5.233	5.268	3.903	0	0	0	0	2	8	1	4	5	21	0	0	0	0	2	16	8	6	7	7	0
gmeb-1	WBGene00015285	C01B12.2	4.958	6.168	6.605	0	1	2	1	3	49	4	3	6	18	1	1	1	0	10	18	9	7	4	3	0.938792
zip-1	WBGene00006986	Y75B8A.35	4.889	3.791	8.106	1	2	5	6	1	5	0	0	1	0	0	0	1	3	3	0	0	0	1	0	56.2787
ztf-22	WBGene00012988	Y48C3A.4	4.683	6.168	3.483	0	0	0	0	0	4	0	3	0	4	0	1	0	1	0	5	6	2	4	1	0.759925
Y37F4.6	WBGene00021387	Y37F4.6	4.683	4.305	5.824	0	2	1	0	0	9	0	1	2	4	0	0	0	0	2	5	2	1	0	1	5.56146
bed-2	WBGene00012943	Y47D3B.9	4.545	4.818	6.065	0	1	0	0	1	21	4	4	4	8	0	0	0	1	6	17	3	5	7	1	2.93393
nhr-17	WBGene00003616	C02B4.2	4.476	5.204	2.942	0	0	0	0	0	6	0	2	2	5	0	0	0	0	0	6	1	0	3	2	1.05944
nhr-70	WBGene00003660	Y51A2D.17	4.476	4.305	4.383	0	0	0	2	3	15	4	4	3	9	0	0	0	1	3	9	6	6	2	2	0.057124
nhr-1	WBGene00003600	R09G11.2	4.338	3.855	3.543	0	0	0	0	0	5	0	0	2	5	0	0	0	1	1	4	2	1	1	2	0.603268
tbx-33	WBGene00006552	Y66A7A.8	4.338	4.497	4.623	0	0	0	0	0	7	1	1	1	6	0	0	0	0	3	2	3	0	1	1	0.145839
ceh-86	WBGene00018355	F42G2.6	4.338	4.112	3.783	0	2	1	1	0	3	0	3	3	2	0	0	0	1	1	4	2	3	0	0	0.578227
K10B3.5	WBGene00019611	K10B3.5	4.338	7.645	5.644	0	0	0	0	0	9	1	1	1	1	0	0	0	0	0	6	2	0	2	1	0.17109
egrh-3	WBGene00044651	Y94H6A.11	4.338	4.497	5.164	0	0	1	8	4	0	1	0	0	1	2	1	1	3	4	3	3	0	2	0	101.18
nhr-190	WBGene00018622	F48G7.11	4.201	4.561	5.044	1	0	0	0	0	5	0	0	0	1	0	0	0	0	1	5	0	0	0	0	0.377378
sptf-3	WBGene00012735	Y40B1A.4	4.132	4.497	5.284	0	1	0	2	1	4	0	0	0	0	0	0	1	1	1	0	1	0	0	0	77.3946
Y37E11B.1	WBGene00021374	Y37E11B.1	4.132	5.782	8.526	0	2	1	1	0	2	0	0	2	0	1	0	0	0	0	1	0	1	1	0	2.6083
nhr-64	WBGene00003654	C45E1.1	3.719	3.212	5.284	0	0	4	0	0	0	0	0	1	0	0	0	1	0	0	1	1	0	0	0	3.57525
tbx-11	WBGene00006547	F40H6.4	3.65	2.634	8.166	1	0	2	1	2	2	1	1	5	5	0	0	0	1	2	2	0	4	2	4	0
lin-38	WBGene00013006	Y48E1B.7	3.65	2.827	2.342	0	2	1	0	0	0	0	0	0	1	0	2	0	0	0	0	0	0	0	0	82.294
pop-1	WBGene00004077	W10C8.2	3.581	2.827	2.222	0	1	4	3	3	7	0	0	1	0	0	0	0	0	2	1	0	1	0	0	61.2189
ztf-13	WBGene00018704	F52E4.8	3.581	2.891	2.762	0	0	0	0	0	6	1	1	1	1	1	0	0	0	0	2	2	0	0	0	0.0661876
nsy-7	WBGene00044508	C18F3.4	3.581	5.397	5.704	0	0	0	0	1	4	0	1	0	9	1	0	0	0	0	6	3	0	0	4	0.644972
C38D4.7	WBGene00008007	C38D4.7	3.512	5.011	4.263	0	1	0	1	2	5	0	0	0	0	0	0	0	2	4	1	0	0	0	0	11.5523
fkh-3	WBGene00001435	C29F7.4	3.443	4.176	3.723	0	0	0	0	0	3	3	0	2	9	0	0	0	0	0	5	3	2	2	2	0
fkh-9	WBGene00001441	K03C7.2	3.443	3.662	5.104	2	0	0	0	0	0	0	0	0	0	0	0	0	0	0	1	0	0	0	0	0.980841
nhr-154	WBGene00007547	C13C4.2	3.305	3.598	2.402	0	0	0	0	0	2	0	0	0	4	0	0	0	0	0	3	3	1	3	0	0.361212
R10E4.11	WBGene00011206	R10E4.11	3.305	3.534	5.044	0	0	4	2	0	2	1	0	0	0	0	0	0	1	1	0	1	0	0	0	99.4403
dro-1	WBGene00001092	F53A2.5	3.236	4.497	3.302	0	0	0	2	0	0	0	0	0	0	0	0	0	0	1	0	0	0	0	0	18.7108
nhr-182	WBGene00018265	F41B5.9	3.236	2.634	2.282	0	0	0	0	0	3	0	1	1	2	0	0	0	0	0	0	1	1	0	0	0.247319
nhr-28	WBGene00003624	C11G6.4	3.168	2.441	4.563	0	0	0	0	0	0	1	0	0	1	0	0	0	0	0	0	0	0	1	0	0.390442
madf-2	WBGene00009461	F36D1.1	3.168	4.818	5.284	0	1	1	0	2	11	2	2	1	6	0	0	0	0	2	9	4	0	2	0	2.69338
ztf-11	WBGene00009939	F52F12.6	3.168	1.413	3.062	0	0	0	0	0	5	0	0	1	4	0	0	0	0	0	1	0	2	1	0	1.73451
efl-2	WBGene00001162	Y48C3A.17	3.099	4.626	5.764	0	1	0	2	2	1	0	0	0	0	0	0	0	0	0	0	0	0	0	0	49.8693
K09A11.1	WBGene00010704	K09A11.1	3.099	5.204	3.122	0	0	0	0	0	3	1	0	0	0	0	0	0	0	0	2	0	0	1	0	0.0858037
ceh-74	WBGene00013876	ZC376.4	3.099	3.919	4.023	0	0	0	0	0	2	2	1	1	2	0	0	0	0	1	4	3	0	1	0	0.605116
fos-1	WBGene00001345	F29G9.4	3.03	3.148	2.762	0	0	0	1	1	6	1	8	5	9	1	2	0	2	3	5	4	4	4	1	3.98606
nhr-4	WBGene00003603	F32B6.1	2.823	3.662	2.402	0	0	0	0	1	12	1	2	7	9	0	0	0	0	2	6	9	1	3	2	0.235456
lin-11	WBGene00003000	ZC247.3	2.754	3.534	6.305	0	0	4	0	1	1	0	0	0	0	0	0	0	0	1	0	0	0	0	0	0.13059
lir-3	WBGene00003046	F37H8.1	2.754	2.698	1.261	1	1	0	0	0	2	1	2	2	6	0	0	0	2	1	2	2	0	1	0	0.288336
egl-44	WBGene00001208	F28B12.2	2.686	2.506	3.242	0	0	0	1	1	0	0	1	0	0	0	0	0	1	0	2	1	0	0	0	0.916128
nhr-35	WBGene00003628	C07A12.3	2.686	2.184	3.122	0	0	0	1	0	0	1	1	2	5	0	0	0	0	0	5	3	0	2	2	0.276517
efl-3	WBGene00009899	F49E12.6	2.686	2.634	4.443	0	0	0	1	0	8	2	1	0	7	0	0	0	0	1	5	1	3	1	1	0.758748
nhr-69	WBGene00003659	T23H4.2	2.617	2.827	2.702	0	0	2	0	1	0	1	0	0	2	0	0	0	0	1	1	0	0	1	2	0.328328
ztf-27	WBGene00011661	T09F3.1	2.548	3.02	2.462	0	1	1	0	0	4	0	2	5	7	0	1	0	1	5	4	4	0	6	4	0.647416
F10E7.11	WBGene00017352	F10E7.11	2.479	2.377	2.282	14	33	75	83	163	103	17	9	31	75	16	30	54	50	86	40	24	18	24	12	1.21939
hlh-11	WBGene00001955	F58A4.7	2.41	3.084	3.062	1	0	1	0	0	26	0	0	1	2	0	0	0	1	13	4	2	0	2	0	3.32146
madf-1	WBGene00021942	Y55F3BR.5	2.41	2.441	3.543	0	2	1	2	2	0	1	0	2	1	0	0	0	1	0	2	1	0	0	0	6.20639
F21D5.4	WBGene00009009	F21D5.4	2.341	4.883	5.524	0	0	0	1	0	14	2	1	2	12	0	1	0	0	5	6	7	0	2	0	13.7661
nhr-76	WBGene00015497	C05G6.1	2.341	1.478	2.222	0	0	0	0	0	1	0	0	1	0	0	0	0	0	1	0	1	0	2	0	0.136295
sup-35	WBGene00012976	Y48A6C.3	2.272	1.413	1.921	0	0	2	1	5	2	0	0	0	3	0	1	1	2	0	3	1	0	1	0	13.325
ham-1	WBGene00001820	F53B2.6	2.204	2.313	11.409	0	1	1	1	0	0	0	0	3	1	0	0	0	0	0	1	2	1	1	0	0.139351
nhr-32	WBGene00003626	K08H2.8	2.204	2.313	3.603	0	0	2	1	0	2	1	4	0	5	0	0	0	0	0	3	3	3	2	2	0.347144
ref-1	WBGene00004334	T01E8.2	2.204	3.341	2.342	0	0	1	0	0	2	0	2	2	2	0	0	0	0	3	4	2	0	0	0	0.39024
hmbx-1	WBGene00018786	F54A5.1	2.204	2.698	3.903	0	0	0	0	0	0	3	2	3	11	0	0	0	0	0	3	0	1	4	2	0
ceh-79	WBGene00007749	C26E1.3	2.135	1.799	1.741	0	0	0	1	0	1	0	0	1	0	0	0	0	1	0	1	0	0	0	0	0.0545778
nhr-19	WBGene00003618	E02H1.7	1.997	1.478	1.501	0	0	0	1	0	4	1	0	0	5	0	0	1	0	0	2	4	3	5	0	2.74736
nhr-132	WBGene00003722	R11G11.1	1.997	2.056	3.363	0	0	0	0	1	0	0	0	0	0	0	0	0	0	0	0	2	0	0	0	0.176272
ets-4	WBGene00017687	F22A3.1	1.997	2.891	1.981	1	0	0	0	0	0	0	0	0	0	0	0	0	0	0	1	1	0	0	0	0.0451834
tbx-2	WBGene00006543	F21H11.3	1.928	2.698	2.642	1	0	8	3	14	2	1	0	3	5	1	0	1	2	12	2	4	3	0	1	7.2136
elf-1	WBGene00016029	C24A1.2	1.928	3.277	4.203	0	0	0	0	1	24	3	2	0	3	0	0	0	0	9	11	3	2	2	1	7.27889
nhr-102	WBGene00003692	T06C12.6	1.859	1.992	1.561	0	0	0	1	0	3	0	0	0	0	0	0	0	0	0	0	0	0	1	0	0.249681
nhr-243	WBGene00013584	Y80D3A.4	1.859	2.763	2.702	0	0	1	2	0	0	0	0	0	3	0	0	0	0	2	1	1	0	0	0	5.409
nhr-97	WBGene00003687	H27C11.1	1.722	1.67	1.261	0	1	1	0	1	3	1	0	1	3	0	0	0	0	1	1	2	1	0	0	0.354063
tag-68	WBGene00006445	F37D6.6	1.653	1.092	1.621	0	1	0	1	1	1	0	0	0	1	0	0	1	0	0	0	0	1	2	1	2.21807
ceh-20	WBGene00000443	F31E3.1	1.584	3.148	4.924	0	0	1	0	0	8	2	0	0	0	0	0	0	0	7	8	0	1	0	0	12.0665
madf-3	WBGene00019218	H20J04.3	1.584	1.092	1.201	0	0	0	1	2	1	0	0	1	0	0	1	3	2	0	1	0	2	0	0	32.4585
ceh-32	WBGene00000453	W05E10.3	1.515	1.735	1.261	0	0	1	0	0	0	1	0	0	0	0	0	0	0	0	0	1	0	0	0	0.31527
somi-1	WBGene00010868	M04G12.4	1.515	1.863	3.242	0	0	1	0	0	3	0	0	0	1	0	0	0	3	1	3	0	0	1	1	0.783949
sma-3	WBGene00004857	R13F6.9	1.446	1.028	1.741	0	0	0	0	0	3	2	0	1	1	0	0	0	0	0	3	1	2	3	1	2.19985
nhr-42	WBGene00003632	C33G8.6	1.377	1.992	1.261	0	0	0	0	0	1	0	1	0	1	0	0	0	0	0	0	1	0	0	0	0.212158
saeg-2	WBGene00011964	T23G5.6	1.377	2.377	1.921	2	3	2	1	2	17	3	0	0	1	0	2	0	0	6	15	3	1	0	2	13.1823
fkh-4	WBGene00001436	C29F7.5	1.308	2.056	1.981	0	0	0	0	0	0	1	1	4	5	0	0	0	0	0	1	4	1	2	2	0
hmg-11	WBGene00001976	T05A7.4	1.24	1.863	1.441	0	1	6	2	0	17	1	0	0	0	1	1	0	1	8	8	1	0	0	0	0.680147
hlh-14	WBGene00001958	C18A3.8	1.171	1.221	2.462	0	0	4	0	1	4	0	0	2	3	0	0	0	0	0	1	0	0	1	0	0.217059
lin-39	WBGene00003024	C07H6.7	1.171	1.028	1.681	0	0	2	0	0	5	0	1	2	3	0	0	0	1	2	1	0	0	1	0	0.504237
bed-3	WBGene00009133	F25H8.6	1.102	2.056	1.141	0	0	0	0	1	3	0	0	3	0	0	0	0	0	3	3	2	0	2	2	1.87298
K04C1.3	WBGene00010553	K04C1.3	1.102	2.184	2.162	0	0	0	0	0	1	1	0	3	5	0	0	0	0	0	1	2	2	0	1	0.084485
T22C8.3	WBGene00011924	T22C8.3	1.102	4.176	1.141	0	0	0	0	0	1	0	0	1	1	0	0	0	0	0	4	0	1	2	0	0
athp-3	WBGene00013799	Y116A8C.22	1.033	1.349	1.021	0	0	0	0	0	5	0	0	0	0	0	0	0	0	1	2	1	2	0	1	0.0825376
dve-1	WBGene00022861	ZK1193.5	0.482	0	0.6	0	0	2	0	0	0	0	0	0	0	0	0	0	1	0	1	0	0	0	0	164.223
nhr-274	WBGene00021522	Y41D4B.21	0.964	1.156	2.162	0	1	1	1	0	0	0	0	0	0	0	0	1	1	0	1	0	0	0	0	105.339
egrh-2	WBGene00043705	Y55F3AM.7	2.686	3.534	5.344	0	0	0	0	0	0	0	0	0	0	0	0	0	0	0	0	0	0	0	0	34.0954
ZK185.1	WBGene00022681	ZK185.1	0.964	0.257	0.12	0	0	0	0	0	0	0	0	0	0	0	0	0	0	0	1	0	0	0	0	23.3613
K11D2.4	WBGene00010770	K11D2.4	1.79	0.835	1.861	0	0	0	1	1	0	0	0	0	0	0	0	0	0	0	0	0	0	0	0	22.6423
ztf-20	WBGene00012702	Y39B6A.46	0.069	0.064	0.24	0	0	0	0	0	0	0	0	0	0	0	0	0	0	0	0	0	0	0	0	20.0091
nhr-15	WBGene00003614	F33E11.1	0.207	0.642	1.801	1	0	1	3	1	0	0	0	0	0	0	0	1	3	0	1	0	0	0	0	11.2168
madf-7	WBGene00015502	C06A5.4	-	-	-	4	11	19	5	9	1	1	1	1	1	2	7	0	7	3	2	0	0	0	0	-
nhr-22	WBGene00003621	K06A1.4	9.09	7.967	10.748	0	0	0	0	0	0	0	0	1	2	0	0	0	0	1	3	3	0	0	0	0.339266
C18C4.5	WBGene00015966	C18C4.5	6.817	6.746	4.984	0	0	0	0	0	0	0	0	1	3	0	0	0	0	0	7	2	1	0	0	3.3872
sup-37	WBGene00006342	C01B7.1	5.165	5.525	7.566	-	-	-	-	-	-	-	-	-	-	-	-	-	-	-	-	-	-	-	-	3.7047
elt-7	WBGene00015981	C18G1.2	2.754	1.735	1.381	0	0	0	0	0	0	0	0	0	1	0	0	0	0	0	0	0	0	2	0	0.243177
elt-6	WBGene00001253	F52C12.5	1.102	1.028	1.741	0	0	0	0	0	0	0	2	1	2	0	0	0	0	0	0	0	0	1	0	0.373005
The following genes are excluded from the screen due to low expresion in the germ line
egl-46	WBGene00001210	K11G9.4	-	-	-	0	0	0	0	0	0	0	0	0	1	1	0	0	0	0	0	0	0	0	0	0.0786696
lim-7	WBGene00002989	C04F1.3	7.23	6.489	8.707	0	0	2	0	0	0	0	0	0	0	0	0	0	0	0	0	0	0	0	0	0.361525
nhr-57	WBGene00003647	T05B4.2	3.994	1.349	1.021	0	0	1	0	0	0	0	0	0	0	0	0	0	0	0	0	0	0	0	0	0.16453
zip-9	WBGene00077761	F17C11.17	1.102	0.257	0.961	0	0	0	0	0	0	0	0	0	0	0	0	0	0	0	0	0	0	0	0	-
nhr-266	WBGene00018993	F56H1.2	0.551	0.128	0.721	0	0	0	0	0	0	0	0	0	0	0	0	0	0	0	0	0	0	0	0	-
nhr-83	WBGene00003673	F48G7.3	0.413	0.385	0.54	0	0	0	0	0	0	0	0	0	0	0	0	0	0	0	0	0	0	0	0	-
nhr-220	WBGene00020591	T19H12.8	0	0.064	0	0	0	0	0	0	0	0	0	0	0	0	0	0	0	0	0	0	0	0	0	-
nhr-75	WBGene00003665	C49D10.6	-	-	-	0	0	0	0	0	0	0	0	0	0	0	0	0	0	0	0	0	0	0	0	-
ceh-85	WBGene00019137	F59H6.6	-	-	-	0	0	0	0	0	0	0	0	0	0	0	0	0	0	0	0	0	0	0	0	-
nhr-250	WBGene00022755	ZK488.1	-	-	-	0	0	0	0	0	0	0	0	0	0	0	0	0	0	0	0	0	0	0	0	-
lin-1	WBGene00002990	C37F5.1	1.033	0.257	0.721	0	2	3	0	0	0	0	0	0	0	0	0	2	0	0	0	1	0	0	0	9.89913
sma-2	WBGene00004856	ZK370.2	1.653	1.606	1.321	0	0	0	0	0	0	0	0	0	0	0	0	0	1	0	0	0	0	0	0	8.97039
mab-3	WBGene00003100	Y53C12B.5	0.413	0.385	0.901	0	0	0	0	0	0	0	0	0	0	0	0	0	0	0	0	0	0	0	0	7.74722
daf-12	WBGene00000908	F11A1.3	0.964	0.835	2.222	0	0	0	0	0	0	0	1	0	0	0	0	0	0	0	0	0	0	1	0	4.91877
sem-4	WBGene00004773	F15C11.1	0.482	0.193	0.18	0	3	0	0	0	1	0	0	0	0	0	0	0	0	0	0	0	0	0	0	4.67741
nhr-121	WBGene00003711	E02H9.8	0.413	0.128	1.081	0	1	0	0	0	0	0	0	0	0	0	0	0	0	1	0	0	0	0	0	4.17152
daf-8	WBGene00000904	R05D11.1	0.207	0.128	0	0	0	0	0	0	0	0	0	0	0	0	0	0	0	0	0	0	0	0	0	4.13496
nhr-27	WBGene00008901	F16H9.2	-	-	-	0	0	0	0	0	0	0	0	0	0	0	0	0	0	0	0	0	0	0	0	4.00569
Y55F3AM.14	WBGene00021931	Y55F3AM.14	0.275	0.128	0.3	0	0	0	0	0	0	0	0	0	0	0	0	0	0	0	0	0	0	0	0	3.97278
lin-14	WBGene00003003	T25C12.1	0.069	0.385	0.18	0	0	0	0	0	0	0	0	0	0	0	0	0	0	0	0	0	0	0	0	3.87189
lfi-1	WBGene00022500	ZC8.4	5.922	0.578	1.501	0	0	0	0	1	1	0	0	0	1	0	0	0	0	0	0	1	0	0	0	3.71359
Y53F4B.5	WBGene00013152	Y53F4B.5	-	-	-	0	0	0	0	0	1	0	0	0	0	0	0	0	0	0	0	0	0	0	0	3.64915
lin-29	WBGene00003015	W03C9.4	0.069	0.064	0.54	0	0	2	0	0	0	0	0	0	0	0	0	0	0	1	1	0	0	1	0	3.4093
ahr-1	WBGene00000096	C41G7.5	0.275	0.064	0.6	0	0	0	0	0	0	0	0	0	0	0	1	0	0	1	0	0	0	0	0	3.16939
klu-1	WBGene00013970	ZK337.2	0.069	0.257	0.3	0	0	0	0	0	0	0	0	0	0	0	0	0	0	0	0	2	1	0	0	3.02847
nhr-236	WBGene00021417	Y38F2AL.5	0.275	0.321	1.141	0	1	1	0	0	1	0	0	0	0	0	2	0	0	0	0	0	0	0	0	2.66733
nhr-165	WBGene00008158	C47F8.2	-	-	-	0	0	0	0	0	0	0	0	0	0	0	0	0	0	0	0	0	0	0	0	2.54104
bcl-11	WBGene00017430	F13H6.1	1.24	0.964	0.781	0	0	0	0	0	0	0	0	0	0	0	0	0	0	0	0	0	0	0	0	2.50486
nhr-8	WBGene00003607	F33D4.1	0.138	1.992	1.021	0	0	0	0	0	1	1	0	0	0	0	0	0	0	0	0	0	0	0	1	2.36892
F21A9.2	WBGene00017651	F21A9.2	1.722	1.156	0.961	0	0	0	0	2	0	0	0	0	0	0	0	0	0	0	0	0	0	0	0	2.11625
ceh-2	WBGene00000429	C27A12.5	0.069	0.257	0.24	0	0	0	0	0	0	0	0	0	0	0	0	0	0	0	0	0	0	0	0	2.09952
mef-2	WBGene00003182	W10D5.1	0.207	0.064	0.12	0	0	0	0	0	0	0	0	0	1	0	0	0	0	0	0	0	0	0	0	2.07568
blmp-1	WBGene00003847	F25D7.3	0.275	0.193	0	0	0	0	0	0	0	0	0	0	0	0	0	0	0	0	0	0	0	0	0	1.96516
dac-1	WBGene00000895	B0412.1	0.275	0.064	0.42	0	0	0	0	0	0	0	0	0	0	0	0	0	0	0	0	0	0	0	0	1.92111
nhr-145	WBGene00012703	Y39B6A.47	0.482	1.092	1.261	0	0	0	0	0	0	1	0	0	0	0	0	0	0	0	0	0	0	0	0	1.8815
klu-2	WBGene00022592	ZC328.2	0.757	0.45	2.582	0	0	0	1	0	0	0	0	0	0	0	0	0	3	0	0	0	1	0	0	1.8604
Y50E8A.12	WBGene00013055	Y50E8A.12	2.961	0.578	2.282	1	0	0	0	0	1	0	0	0	0	0	0	1	0	0	0	0	0	0	0	1.82188
nhr-88	WBGene00003678	K08A2.5	0.207	0.514	0.781	0	0	0	0	0	0	0	0	0	0	0	0	0	0	0	0	0	0	0	0	1.73438
Y48G1C.6	WBGene00021679	Y48G1C.6	0.964	1.67	2.462	0	0	0	0	1	18	2	0	0	3	0	0	0	1	1	3	2	1	0	0	1.71901
ceh-43	WBGene00000463	C28A5.4	0.207	0.385	0.66	0	0	1	0	1	3	0	0	0	1	0	1	1	0	1	0	0	0	0	1	1.68062
let-381	WBGene00002601	F26B1.7	0.069	0.257	0.3	0	0	2	0	0	0	0	0	0	0	0	0	0	0	1	0	0	0	0	0	1.67315
irx-1	WBGene00007984	C36F7.1	0.344	0.193	0.3	0	0	2	0	1	1	0	0	0	0	1	0	1	2	0	2	0	1	0	0	1.59193
pha-4	WBGene00004013	F38A6.1	0.275	0.064	1.021	1	0	3	0	0	0	0	0	0	1	0	1	1	0	2	0	1	1	0	0	1.58778
nhr-41	WBGene00022423	Y104H12A.1	0.069	0.128	0	0	0	0	0	0	0	0	0	0	0	0	0	0	0	0	0	0	0	0	0	1.57122
bar-1	WBGene00000238	C54D1.6	2.686	3.855	1.981	0	0	0	0	0	0	0	0	0	1	0	0	0	0	0	0	0	0	0	0	1.52088
nhr-91	WBGene00003681	Y15E3A.1	0.689	1.156	1.081	0	0	0	0	0	0	0	0	0	0	0	0	0	0	1	0	0	0	0	0	1.47013
ceh-84	WBGene00016557	C40D2.4	-	-	-	0	0	0	0	0	0	0	0	0	0	0	0	0	0	0	0	0	0	0	0	1.45813
B0310.2	WBGene00015138	B0310.2	0.895	1.735	0.66	0	0	0	0	0	0	1	0	1	4	0	0	0	0	0	0	0	0	0	0	1.44626
chpf-2	WBGene00019108	F59D6.7	0.207	0.257	0.18	0	0	0	0	0	0	0	0	0	0	0	0	0	0	0	0	0	0	0	0	1.44404
ceh-18	WBGene00000441	ZC64.3	4.269	2.634	3.663	0	0	0	0	0	0	0	0	0	0	0	0	0	0	0	0	0	2	0	0	1.40237
zip-7	WBGene00013100	Y51H4A.4	0.482	0.128	1.321	0	5	2	0	2	1	0	0	0	0	0	0	1	1	0	0	0	0	0	1	1.38847
ceh-19	WBGene00000442	F20D12.6	0.275	0.257	0.36	0	0	0	0	1	0	0	0	0	2	0	0	0	0	0	0	0	0	0	0	1.38716
nhr-7	WBGene00003606	F54D1.4	0.344	0.514	0.06	0	0	0	0	0	3	0	1	0	1	0	0	0	0	0	2	0	0	0	2	1.38431
vab-3	WBGene00006870	F14F3.1	0.069	0	0.66	0	0	0	0	0	0	0	0	0	0	0	0	0	0	0	0	0	0	0	0	1.36599
sem-2	WBGene00004771	C32E12.5	2.823	4.305	3.242	0	0	0	0	0	0	0	0	0	0	0	0	0	0	0	0	0	0	0	0	1.31133
fezf-1	WBGene00012639	Y38H8A.5	0.207	0	0.54	0	0	0	0	0	1	0	0	0	0	1	0	0	0	0	0	0	0	0	0	1.3023
K12H6.12	WBGene00019691	K12H6.12	1.033	0.964	0.48	0	0	0	0	1	0	0	0	0	2	0	0	0	0	0	1	1	0	0	0	1.25331
cebp-1	WBGene00016997	D1005.3	0.275	0.064	0.42	0	0	0	0	0	0	0	0	0	0	0	0	0	0	0	0	0	0	0	0	1.22809
elt-2	WBGene00001250	C33D3.1	0.138	0	0.18	1	3	6	6	48	4	0	0	0	4	1	2	3	3	4	3	2	1	2	0	1.17766
egl-13	WBGene00001182	T22B7.1	0.826	0.514	0.36	0	0	0	0	0	1	0	0	0	2	0	0	0	0	0	0	0	0	0	0	1.17114
C27A2.7	WBGene00044386	C27A2.7	0.138	0	0.12	0	0	0	0	0	0	0	0	0	0	0	0	0	0	0	0	0	0	0	0	1.16334
pax-2	WBGene00003938	K06B9.5	-	-	-	0	0	0	0	0	0	0	0	0	0	0	0	0	0	0	0	0	0	0	0	1.15719
tlp-1	WBGene00006580	T23G4.1	0.895	0.707	1.501	0	0	2	0	0	0	0	1	7	6	0	0	0	0	0	0	6	1	7	0	1.15224
T20H4.2	WBGene00020635	T20H4.2	5.096	1.542	3.242	0	0	0	0	0	1	0	0	0	0	0	0	0	0	0	0	0	0	0	0	1.14213
ceh-60	WBGene00017690	F22A3.5	-	-	-	0	0	0	0	0	0	0	0	0	0	0	0	0	0	0	0	0	0	0	0	1.13796
ast-1	WBGene00020368	T08H4.3	0	0.064	0.06	0	0	0	0	0	0	0	0	0	0	0	0	0	0	0	0	0	0	0	0	1.09687
ceh-41	WBGene00000462	T26C11.5	3.719	3.469	4.744	0	0	0	0	0	0	0	0	0	0	0	0	0	0	0	0	0	0	0	0	1.0853
nhr-25	WBGene00003623	F11C1.6	0.138	0.193	0.24	0	0	0	0	0	0	0	0	0	1	0	1	0	0	1	1	0	0	0	0	1.07195
zip-10	WBGene00012101	T27F2.4	0.413	0.321	0.6	0	0	0	0	0	0	0	0	0	0	0	0	0	0	0	0	0	0	0	0	1.05155
ceh-10	WBGene00000435	W03A3.1	0.275	0.193	0.36	0	1	1	0	0	0	0	0	0	0	0	0	0	0	0	0	0	0	0	0	1.05045
ZK686.5	WBGene00022795	ZK686.5	7.23	1.413	3.603	0	0	0	0	0	0	0	0	0	0	0	2	0	0	0	0	0	0	0	0	1.04298
hlh-6	WBGene00001952	T15H9.3	0.069	0.128	0.18	0	2	0	2	0	0	0	0	0	0	0	0	0	0	1	0	0	0	0	0	1.03742
sma-4	WBGene00004858	R12B2.1	2.272	1.285	2.282	0	0	0	0	0	0	0	0	0	1	0	0	0	0	0	0	0	0	0	0	1.01745
gmeb-2	WBGene00010010	F53H4.5	0.689	1.028	1.801	0	0	0	0	0	0	0	0	0	0	0	0	0	0	0	0	0	0	0	0	0.960842
Y82E9BR.17	WBGene00022349	Y82E9BR.17	0.069	0.128	0.18	0	0	1	0	0	0	0	0	0	0	1	0	0	0	0	0	0	1	0	0	0.955621
gei-3	WBGene00001560	T22H6.6	3.512	3.726	5.284	0	0	0	0	0	0	0	0	0	0	0	0	0	0	0	0	0	0	0	0	0.923916
lect-2	WBGene00019407	K05F1.5	1.102	0.642	0.54	0	0	1	1	0	0	0	0	0	2	1	0	0	0	1	0	1	0	0	1	0.906432
nhr-173	WBGene00016975	C56E10.1	0.138	0	0	0	0	0	0	0	0	0	0	0	0	0	0	0	0	0	0	0	0	0	0	0.894713
M03D4.4	WBGene00019751	M03D4.4	0	0.128	0	0	0	1	0	0	0	0	0	0	1	0	0	0	0	1	0	0	0	0	0	0.878145
sox-4	WBGene00015716	C12D12.5	0.069	0.321	0.06	0	0	0	0	0	0	1	0	0	0	0	0	0	0	0	0	1	0	0	0	0.856635
sox-2	WBGene00004949	K08A8.2	0.482	0.193	0.18	1	0	0	0	1	2	0	1	1	0	0	0	0	0	0	0	1	0	0	0	0.847035
F27D4.6	WBGene00009190	F27D4.6	3.856	0.707	1.741	1	0	0	0	0	1	0	1	0	0	0	0	0	0	0	1	0	0	0	0	0.824102
zip-8	WBGene00017755	F23F12.9	0.138	0.064	0.18	0	0	3	1	1	0	0	0	0	0	0	0	1	1	0	1	1	1	0	0	0.798323
ceh-26	WBGene00000448	K12H4.1	0.069	0.064	0.42	0	0	1	0	0	0	0	0	0	0	0	0	0	0	0	0	0	0	0	0	0.77427
zag-1	WBGene00006970	F28F9.1	0.207	0.257	0.06	0	0	0	0	0	0	0	0	0	0	0	0	0	0	0	0	0	0	0	0	0.772167
nhr-5	WBGene00003604	Y73F8A.21	0.413	0.128	0.06	0	0	0	0	0	0	0	0	0	0	0	0	0	0	0	0	0	0	0	0	0.749171
ztf-26	WBGene00010137	F55H12.6	0.551	0.064	0.18	0	0	0	0	0	0	0	0	0	0	0	0	0	0	0	0	0	0	0	0	0.738567
ngn-1	WBGene00003595	Y69A2AR.29	0.275	0.193	0.36	0	0	0	0	0	0	0	0	0	0	0	0	0	0	0	0	0	0	0	0	0.738357
nhr-85	WBGene00003675	W05B5.3	0.138	0	0.06	0	0	0	0	0	0	0	0	0	0	0	0	0	0	0	0	0	0	0	0	0.73627
ets-8	WBGene00016798	C50A2.4	-	-	-	0	0	0	0	0	1	0	0	0	0	0	0	0	0	0	0	0	0	0	0	0.721399
hpo-39	WBGene00022020	Y61A9LA.9	-	-	-	0	0	0	0	0	0	0	0	0	0	0	0	0	0	0	0	0	0	0	0	0.715709
nhr-65	WBGene00003655	Y17D7A.3	0.895	0.642	1.021	0	0	0	0	0	2	2	0	1	0	0	0	0	0	0	4	1	0	0	0	0.700831
nhr-11	WBGene00003610	ZC410.1	0.62	0.964	1.141	0	0	0	0	1	0	0	0	0	1	0	0	0	0	0	0	0	0	0	0	0.691382
ctbp-1	WBGene00006424	F49E10.5	0.275	0	0	0	0	0	0	0	0	0	0	0	0	0	0	0	0	0	0	0	0	0	0	0.676603
pha-2	WBGene00004011	M6.3	-	-	-	0	0	0	0	0	0	0	0	0	0	0	0	0	0	0	0	0	0	0	0	0.660276
ceh-16	WBGene00000439	C13G5.1	0.069	0.257	0.66	0	0	0	0	0	0	0	0	0	0	0	0	0	0	0	0	0	0	0	0	0.657457
ceh-6	WBGene00000431	K02B12.1	2.066	1.606	0.6	0	0	0	0	0	0	0	0	1	0	0	0	0	0	0	0	0	0	0	0	0.651039
svh-5	WBGene00006462	C33A11.4	0.413	0.193	0.3	0	0	0	0	0	0	0	0	0	0	1	0	0	0	0	1	0	0	0	1	0.642418
ref-2	WBGene00004335	C47C12.3	0	0.064	0	0	0	0	0	0	0	0	0	0	0	0	0	0	0	0	0	0	0	0	0	0.637156
nhr-209	WBGene00011100	R07B7.16	0.207	0.064	0.24	0	0	0	0	0	0	0	0	0	0	0	0	0	0	0	0	0	0	0	0	0.623243
klf-1	WBGene00018990	F56F11.3	0.551	0.514	0.54	0	0	0	0	0	0	0	0	0	0	0	0	0	0	0	0	0	0	0	0	0.622612
ztf-16	WBGene00019960	R08E3.4	0.482	0.578	0.36	0	0	1	1	0	0	0	0	0	0	0	1	0	0	0	0	0	0	0	0	0.618737
mxl-3	WBGene00003511	F46G10.6	0.413	0.514	1.441	0	0	0	0	0	0	0	0	0	0	0	0	0	0	1	1	0	0	0	0	0.609716
ztf-2	WBGene00008762	F13G3.1	0	0	0.3	0	0	0	0	0	0	1	0	0	0	0	0	0	0	0	0	1	0	0	0	0.606421
nhr-239	WBGene00021848	Y54F10AM.1	0.62	0.45	0.54	0	0	0	0	0	0	0	0	0	0	0	0	0	0	0	0	0	0	0	0	0.604271
F26A10.2	WBGene00017814	F26A10.2	0	0.128	0.06	0	0	0	0	0	0	0	0	0	0	0	0	0	0	0	0	0	0	0	0	0.601842
nhr-63	WBGene00003653	C06C6.4	0.138	0.128	0	0	0	0	0	0	0	0	0	0	0	0	0	0	0	0	0	0	0	0	0	0.579502
Y75B8A.6	WBGene00013543	Y75B8A.6	-	-	-	0	1	0	0	0	0	0	0	0	0	0	0	0	0	0	0	0	0	0	0	0.575692
syd-9	WBGene00044068	ZK867.1	0.207	0	0	0	0	0	0	0	0	0	0	0	0	0	0	0	0	0	0	0	0	0	0	0.572368
rnt-1	WBGene00004393	B0414.2	0	0.321	0.42	1	0	0	0	0	1	0	0	0	0	0	0	0	0	0	1	0	0	0	0	0.571671
end-3	WBGene00001311	F58E10.5	0.275	0.899	1.561	0	0	0	0	0	0	0	0	0	0	0	0	0	0	0	0	0	0	0	0	0.56105
T18D3.7	WBGene00011824	T18D3.7	1.102	0.514	0.961	0	0	0	0	0	0	0	0	0	1	0	0	0	0	0	0	0	0	0	0	0.557823
ztf-6	WBGene00012317	W06H12.1	17.215	13.941	17.233	0	0	0	0	0	0	0	0	0	0	0	0	0	0	0	0	0	0	0	0	0.545033
madf-10	WBGene00013717	Y106G6H.4	0.482	0.707	1.021	0	0	0	0	1	0	0	0	0	0	0	0	0	0	0	0	0	0	0	0	0.54288
ztf-29	WBGene00013438	Y66D12A.12	0.413	0.642	0.66	0	0	2	0	0	3	0	2	5	22	0	0	0	0	1	5	5	3	7	4	0.537974
nhr-230	WBGene00012446	Y17D7A.1	0.138	0.193	0.54	0	0	1	0	0	0	0	0	0	0	0	0	0	0	0	0	0	0	0	0	0.528085
ceh-8	WBGene00000433	ZK265.4	0.138	0.064	0.42	0	0	0	0	0	0	0	0	0	0	0	0	0	0	0	0	0	0	0	0	0.50074
lim-6	WBGene00002988	K03E6.1	12.739	11.5	9.067	0	0	0	0	1	0	0	0	0	0	0	0	0	0	0	0	0	0	0	0	0.489693
F47E1.3	WBGene00018567	F47E1.3	-	-	-	0	0	0	0	0	0	0	0	0	0	0	0	0	0	0	0	0	0	0	0	0.487702
unc-3	WBGene00006743	Y16B4A.1	0.275	0	0	0	0	0	0	0	0	0	0	0	0	0	0	0	0	0	0	0	0	0	0	0.486955
nhr-6	WBGene00003605	C48D5.1	1.308	1.67	0.36	0	0	0	0	0	3	1	0	3	1	0	0	0	0	1	1	0	0	0	2	0.48616
ztf-30	WBGene00015523	C06E1.8	0	0.128	0	0	0	0	0	0	0	0	0	0	0	0	0	0	0	0	0	0	0	0	0	0.485221
madf-9	WBGene00022608	ZC416.1	0.275	0.45	0.3	0	0	0	0	0	0	0	0	0	0	0	0	0	0	0	0	0	0	0	0	0.483361
nhr-232	WBGene00012494	Y22F5A.1	0.344	0.193	0.06	0	0	0	0	0	0	0	0	0	0	0	0	0	0	0	0	0	0	0	0	0.476894
ceh-53	WBGene00015651	C09G12.1	-	-	-	0	0	0	0	0	0	0	0	0	0	0	0	0	0	0	0	0	0	0	0	0.473106
fkh-10	WBGene00001442	C25A1.2	0.275	0.385	0.12	0	0	0	0	0	0	0	0	0	0	0	0	0	0	0	0	0	0	0	0	0.471845
nob-1	WBGene00003779	Y75B8A.2	0.138	0	0.24	0	0	0	0	0	0	0	0	0	0	0	0	0	0	0	0	0	0	0	1	0.458621
ceh-62	WBGene00011069	R06F6.6	0.62	0.321	0.24	0	0	0	0	0	0	0	0	0	0	0	0	0	0	0	0	0	0	0	0	0.456678
nhr-14	WBGene00003613	T01B10.4	0.275	0.257	0.24	0	0	0	0	0	1	0	0	0	0	0	0	1	0	0	0	0	0	0	0	0.455477
lin-31	WBGene00003017	K10G6.1	-	-	-	0	0	0	0	0	0	0	0	0	2	0	0	0	0	0	0	1	0	0	0	0.445996
F10B5.3	WBGene00008640	F10B5.3	0	0.128	0.06	0	1	0	1	0	0	0	0	0	0	0	0	0	0	0	0	0	0	0	0	0.433513
unc-30	WBGene00006766	B0564.10	-	-	-	0	0	0	0	0	0	0	0	0	0	0	0	0	0	0	0	0	0	0	0	0.432065
ceh-37	WBGene00000458	C37E2.5	0.069	0	0.42	0	0	0	0	0	0	0	0	0	0	0	0	0	0	0	0	0	0	0	0	0.428099
nhr-124	WBGene00003714	C17E7.8	-	-	-	0	0	0	0	0	0	0	0	0	0	0	0	0	1	0	0	0	0	0	0	0.428054
nhr-60	WBGene00003650	F57A10.5	0.069	0	0.12	0	0	1	0	0	0	0	0	0	0	0	0	0	0	0	0	0	0	0	0	0.414194
bnc-1	WBGene00044791	F55C5.11	0.069	0.064	0.3	0	0	0	0	0	0	0	0	0	0	0	0	0	0	0	0	0	0	0	0	0.412803
hbl-1	WBGene00001824	F13D11.2	0.482	1.221	0.3	0	0	0	0	0	0	0	0	0	0	0	0	0	0	0	0	0	0	0	0	0.412074
nhr-31	WBGene00003625	C26B2.3	1.102	1.221	1.081	0	0	0	0	0	0	0	0	0	0	0	0	0	0	0	0	0	0	0	0	0.409224
nhr-137	WBGene00003727	C56E10.4	0	0.064	0.48	0	0	0	0	0	0	0	0	0	0	0	0	0	0	0	0	0	0	0	0	0.407886
ceh-14	WBGene00000438	F46C8.5	0.138	0.128	0.24	0	0	0	0	0	0	0	0	0	0	0	0	0	0	0	0	0	0	0	0	0.405857
nhr-142	WBGene00018430	F44E7.8	0.551	0.193	0.18	0	0	0	0	0	0	0	0	0	0	0	0	0	0	0	0	0	0	0	0	0.401136
nhr-204	WBGene00019816	R02C2.4	0.62	0.385	0.721	0	0	0	1	0	1	0	1	1	0	0	0	0	0	1	1	0	0	0	0	0.393948
nhr-45	WBGene00003635	F16H11.5	2.204	1.992	0.901	0	0	0	0	0	1	0	0	0	3	0	0	0	0	0	0	0	1	1	0	0.39381
2L52.1	WBGene00007063	2L52.1	0.964	1.028	0.36	0	0	0	0	0	2	1	0	0	0	0	0	0	0	0	1	0	0	0	0	0.393084
nhr-196	WBGene00010600	K06B4.5	-	-	-	0	0	0	0	0	0	0	0	0	0	0	0	0	0	0	0	0	0	0	0	0.392754
ttx-1	WBGene00006652	Y113G7A.6	0	0	0.36	0	0	0	0	0	1	0	0	0	0	0	0	0	0	0	0	0	0	0	0	0.392706
ceh-13	WBGene00000437	R13A5.5	0	0	0.12	0	0	1	0	0	1	0	0	0	1	0	0	0	0	0	0	0	0	0	0	0.392389
nhr-44	WBGene00003634	T19A5.4	0	0	0.42	0	0	0	0	0	0	0	0	0	0	0	0	0	0	0	0	0	0	0	0	0.389186
nhr-219	WBGene00020555	T19A5.5	-	-	-	0	0	0	0	0	0	0	0	0	0	0	0	0	0	0	0	0	0	0	0	0.389084
W04B5.2	WBGene00021019	W04B5.2	0.413	1.542	0.36	0	0	0	0	0	3	0	0	0	0	0	0	0	0	0	0	0	0	0	0	0.387635
peb-1	WBGene00003968	T14F9.4	0.551	0.385	0.36	0	0	0	0	0	2	0	0	1	5	1	0	0	0	1	0	0	0	0	0	0.383583
unc-42	WBGene00006778	F58E6.10	0	0	0	0	0	0	0	0	1	0	0	0	0	0	0	0	0	0	0	0	0	0	0	0.383571
mec-3	WBGene00003167	F01D4.6	-	-	-	0	0	0	0	0	0	0	0	0	1	0	0	0	0	0	0	0	0	0	0	0.382647
dmd-8	WBGene00020708	T22H9.4	0	0.064	0	0	0	0	0	0	0	0	0	0	0	0	0	0	0	0	0	0	0	0	0	0.37867
Y60A3A.25	WBGene00044211	Y60A3A.25	-	-	-	0	0	0	0	0	0	0	0	0	0	0	0	0	0	0	0	0	0	0	0	0.364796
egl-43	WBGene00001207	R53.3	-	-	-	0	0	0	0	0	0	0	0	0	0	0	0	0	0	0	0	0	0	0	0	0.359401
hlh-33	WBGene00021446	Y39A3CR.6	0.275	1.156	0.54	0	0	0	0	0	0	0	0	0	0	0	0	0	0	0	0	0	0	0	0	0.358051
nhr-59	WBGene00003649	T27B7.1	0.413	0.707	0.18	0	0	0	0	0	1	0	0	0	1	0	0	0	0	0	0	0	0	1	0	0.35705
ham-2	WBGene00001821	C07A12.1	-	-	-	0	0	0	0	0	0	0	0	0	0	0	0	0	0	0	0	0	0	0	0	0.356226
pat-9	WBGene00003933	T27B1.2	0.413	0.321	0.24	-	-	-	-	-	-	-	-	-	-	-	-	-	-	-	-	-	-	-	-	0.348531
nhr-105	WBGene00003695	C06G3.1	4.132	2.827	3.483	0	0	0	0	0	0	0	1	0	1	0	0	0	0	0	0	0	0	0	0	0.343588
grh-1	WBGene00001707	Y48G8AR.1	-	-	-	0	0	0	0	0	0	0	0	0	0	0	0	0	0	0	0	0	0	0	0	0.338637
hlh-8	WBGene00001953	C02B8.4	0.138	0	0.18	0	0	0	0	0	0	0	0	0	0	0	0	0	0	0	0	0	0	0	0	0.33321
nhr-159	WBGene00015902	C17E7.7	-	-	-	0	0	0	0	0	0	0	0	0	0	0	0	0	0	0	0	0	0	0	0	0.333
nhr-36	WBGene00017198	F07C3.10	-	-	-	0	0	0	0	0	0	0	0	0	0	0	0	0	0	0	0	0	0	0	0	0.326784
nhr-180	WBGene00017961	F31F4.12	0	0	0	0	0	0	0	0	2	0	0	0	0	0	0	0	0	0	0	0	0	0	0	0.324387
nhr-68	WBGene00003658	H12C20.3	0.275	1.606	1.321	0	1	0	2	0	0	2	1	0	0	0	0	0	0	1	0	0	1	0	0	0.321988
lin-22	WBGene00003008	Y54G2A.1	-	-	-	0	0	0	0	0	0	0	0	0	0	0	0	0	0	0	0	0	0	0	0	0.318388
atf-2	WBGene00000220	K08F8.2	0.207	0.642	0.54	0	0	2	0	4	0	0	2	0	0	0	0	0	1	2	2	0	0	0	0	0.312565
nhr-111	WBGene00003701	F44G3.9	-	-	-	0	0	0	0	0	0	0	0	0	0	0	0	0	0	0	0	0	0	0	0	0.309199
mab-23	WBGene00003114	C32C4.5	-	-	-	0	0	0	0	0	0	0	0	0	0	0	0	0	0	0	0	0	0	0	0	0.306761
nhr-50	WBGene00003640	C06C6.5	3.374	2.377	4.684	0	0	0	0	0	0	0	0	0	0	0	0	0	0	0	0	0	0	0	0	0.306744
ceh-9	WBGene00000434	Y65B4BR.9	0	0.064	0.24	0	0	0	0	0	0	0	0	0	0	0	0	0	0	0	0	0	0	0	0	0.303702
R07E5.5	WBGene00011113	R07E5.5	-	-	-	0	0	0	0	0	0	0	0	0	0	0	0	0	0	0	0	0	0	0	0	0.302748
cfi-1	WBGene00000476	T23D8.8	-	-	-	0	0	0	0	0	0	0	0	0	0	0	0	0	0	0	0	0	0	0	0	0.300665
Y71A12B.8	WBGene00013505	Y71A12B.8	0	0.064	0.06	0	0	0	0	0	1	0	0	0	0	0	0	0	0	0	0	0	0	0	0	0.296935
egl-38	WBGene00001204	C04G2.7	0.207	0.064	0	0	0	0	0	0	0	0	0	0	0	0	0	0	0	0	0	0	0	0	0	0.296433
pax-3	WBGene00003939	F27E5.2	-	-	-	0	0	0	0	0	0	0	0	0	0	0	0	0	0	0	0	0	0	0	0	0.280112
klf-3	WBGene00003480	F54H5.4	0.275	0.257	0.18	1	0	0	0	0	2	0	0	0	0	0	0	0	0	0	1	0	0	1	0	0.277
lim-4	WBGene00002987	ZC64.4	-	-	-	0	0	0	0	0	0	0	0	0	0	0	0	0	0	0	0	0	0	0	0	0.275708
alr-1	WBGene00044330	R08B4.2	0.138	0.321	0	0	0	0	0	0	0	0	0	0	0	0	0	0	0	0	0	0	0	0	0	0.275458
nhr-128	WBGene00003718	F44C8.5	0.069	0.385	0.06	0	0	0	0	0	0	0	0	0	0	0	0	0	0	0	0	0	0	0	0	0.27341
elt-3	WBGene00001251	K02B9.4	1.515	0.257	1.621	0	0	1	0	0	0	0	0	0	0	0	0	0	0	0	0	0	0	0	0	0.272936
nhr-213	WBGene00011520	T06C12.13	-	-	-	0	0	0	0	0	0	0	0	0	0	0	0	0	0	0	0	0	0	0	0	0.269344
nhr-109	WBGene00003699	T12C9.5	0.138	0.193	0.12	1	0	0	0	0	0	0	0	0	0	0	0	0	0	0	0	0	0	0	0	0.267385
Y44A6D.3	WBGene00012854	Y44A6D.3	1.102	1.285	0.781	2	0	0	1	2	2	0	1	0	2	0	0	0	0	2	3	3	3	2	2	0.266866
nhr-177	WBGene00017503	F16B4.1	0.482	0.578	0.36	0	0	0	0	0	0	0	0	0	0	0	0	0	0	0	0	0	0	0	0	0.266478
hlh-16	WBGene00001960	DY3.3	0.275	0.257	0.841	0	0	0	0	0	0	0	0	0	0	0	0	0	0	0	0	0	0	0	0	0.26586
nhr-33	WBGene00013976	ZK455.6	-	-	-	0	0	0	1	0	0	0	0	0	0	0	0	0	0	0	0	0	0	0	0	0.264494
hmg-6	WBGene00009827	F47G4.6	-	-	-	0	0	0	0	0	0	0	0	0	0	0	0	0	0	0	0	0	0	0	0	0.264172
ceh-30	WBGene00000451	C33D12.7	-	-	-	0	0	0	0	0	0	0	0	0	0	0	0	0	0	0	0	0	0	0	0	0.259551
hlh-1	WBGene00001948	B0304.1	0.069	0	0.12	0	0	0	0	0	0	0	0	0	0	0	0	0	0	0	0	0	0	0	0	0.256658
ceh-1	WBGene00000428	F16H11.4	0	0.064	0.18	0	0	0	0	0	0	0	0	0	0	0	0	0	0	0	0	0	0	0	0	0.255725
hlh-4	WBGene00001951	T05G5.2	0.069	0.385	0.24	0	0	0	0	0	0	0	0	0	0	0	0	0	0	0	0	0	0	0	0	0.253539
ceh-51	WBGene00013583	Y80D3A.3	0.207	0.257	0.36	0	0	2	0	0	0	0	0	0	0	0	0	0	0	0	0	0	0	0	0	0.251687
sptf-2	WBGene00011926	T22C8.5	0.138	0.064	1.021	0	0	0	0	0	0	0	0	0	0	0	0	0	0	0	0	0	0	0	0	0.250948
nhr-203	WBGene00019743	M02H5.5	0.138	0.257	0.54	0	0	0	1	0	0	0	0	0	0	0	0	0	0	0	0	0	0	1	0	0.2481
unc-55	WBGene00006790	F55D12.4	0.069	0.064	0	0	0	0	0	0	0	0	0	0	0	0	0	0	0	0	0	0	0	0	0	0.247566
nhr-103	WBGene00003693	F44C8.4	0.069	0.064	0.18	1	0	0	0	0	0	0	0	0	0	0	0	0	0	0	0	0	0	0	0	0.244763
zip-5	WBGene00007932	C34D1.5	0	0.128	0.12	0	0	0	0	0	0	0	0	0	0	0	0	0	0	0	0	0	0	0	0	0.242671
grl-25	WBGene00001734	ZK643.8	-	-	-	0	0	0	0	0	0	0	0	0	0	0	0	0	0	0	0	0	0	0	0	0.241495
C46E10.8	WBGene00016712	C46E10.8	15.218	21.33	17.053	0	0	0	0	0	0	0	0	0	0	0	0	0	0	0	0	0	0	0	0	0.240926
atf-8	WBGene00017535	F17A9.3	0.275	0.257	0.36	0	0	0	0	0	0	0	0	0	0	0	0	0	0	0	0	0	0	0	0	0.239345
nhr-101	WBGene00003691	H12C20.6	0.964	1.349	1.201	1	0	0	0	0	0	0	0	0	0	0	0	0	0	0	0	0	0	0	0	0.238166
vab-7	WBGene00006873	M142.4	-	-	-	0	0	0	0	0	0	0	0	0	0	0	0	0	0	0	0	0	0	0	0	0.232447
nhr-79	WBGene00003669	T26H2.9	0.482	0.193	0	0	0	0	0	0	0	0	0	0	0	0	0	0	0	0	0	0	1	0	0	0.232143
C32E8.1	WBGene00016320	C32E8.1	0.826	0.193	0.54	0	0	0	0	0	0	0	0	0	0	0	0	0	0	0	0	0	0	0	0	0.229713
hlh-27	WBGene00001966	C17C3.10	-	-	-	0	0	0	0	0	0	0	0	0	0	0	0	0	0	0	0	0	0	0	0	0.227746
tbx-8	WBGene00006545	T07C4.2	0	0	0.3	0	0	1	0	0	1	0	0	0	0	0	0	0	0	1	0	0	0	0	0	0.22731
snai-1	WBGene00019299	K02D7.2	-	-	-	0	0	0	0	0	0	0	0	0	0	0	0	0	0	0	0	0	0	0	0	0.226006
nhr-286	WBGene00044699	VC5.6	2.892	1.67	1.801	0	0	0	0	0	0	0	0	1	0	0	0	0	0	0	0	0	0	0	0	0.225406
nhr-26	WBGene00011568	T07C5.5	-	-	-	0	0	0	0	0	0	0	0	0	0	0	0	0	0	0	0	0	0	0	0	0.221393
nhr-231	WBGene00012449	Y17D7B.1	0.895	0.642	0.901	0	0	0	0	0	0	0	0	0	0	0	0	0	0	0	0	0	0	0	0	0.219347
nhr-241	WBGene00013483	Y69H2.8	-	-	-	0	0	0	0	0	0	0	0	0	0	0	0	0	0	0	0	0	0	0	0	0.216912
nhr-169	WBGene00008289	C54C8.1	-	-	-	0	0	0	0	0	0	0	0	0	0	0	0	0	0	0	0	0	0	0	0	0.216873
ceh-90	WBGene00010995	R03E1.4	-	-	-	0	0	0	0	0	0	0	0	0	0	0	0	0	0	0	0	0	0	0	0	0.216608
tag-122	WBGene00006471	Y32B12B.6	-	-	-	0	0	0	0	0	0	0	0	0	0	0	0	0	0	0	0	0	0	0	0	0.214549
fkh-6	WBGene00001438	B0286.5	9.227	9.316	7.506	0	0	0	0	0	0	0	0	0	0	0	0	0	0	0	0	0	0	1	0	0.212679
nhr-207	WBGene00011098	R07B7.14	0.895	1.028	0.901	0	0	0	0	0	0	0	0	1	0	0	0	0	0	0	0	0	0	0	0	0.210688
nhr-152	WBGene00015705	C12D5.2	0.757	0	0	0	0	0	0	0	0	0	0	0	0	0	0	0	0	0	0	0	0	0	0	0.206303
cnd-1	WBGene00000561	C34E10.7	0.069	0	0.06	0	0	0	0	0	0	0	0	0	0	0	0	0	0	0	0	0	0	0	0	0.201754
nhr-62	WBGene00003652	Y67A6A.2	3.03	1.285	0.42	0	0	2	0	0	0	0	0	0	1	0	0	0	0	0	0	0	0	0	0	0.201465
nhr-170	WBGene00008309	C54E10.5	-	-	-	0	0	0	0	0	0	0	0	0	0	0	0	0	0	0	0	0	0	0	0	0.200214
unc-130	WBGene00006853	C47G2.2	0.138	0	0	0	0	3	0	0	0	0	0	0	0	0	0	0	0	0	0	0	0	0	0	0.199787
nhr-222	WBGene00020750	T24A6.11	-	-	-	0	0	0	0	0	0	0	0	0	0	0	0	0	0	0	0	0	0	0	0	0.199657
nhr-237	WBGene00021610	Y46H3D.6	0.275	0.45	0.54	0	0	0	0	0	1	0	0	1	0	0	0	0	0	0	2	0	0	0	0	0.197167
nhr-168	WBGene00008221	C50B6.8	0.62	0.45	0.3	0	0	0	0	0	0	0	0	0	3	0	0	0	0	0	0	0	0	0	0	0.195536
mnm-2	WBGene00003380	C10A4.8	0.344	0.257	0.18	0	0	1	0	0	0	0	0	0	0	0	0	0	2	1	0	0	0	0	0	0.194609
ttx-3	WBGene00006654	C40H5.5	-	-	-	0	0	0	0	0	0	0	0	0	0	0	0	0	0	0	0	0	0	0	0	0.193927
nhr-178	WBGene00017510	F16B4.9	0.482	0.064	0.3	0	0	0	0	0	0	0	0	0	0	0	0	0	0	0	0	0	0	0	0	0.193833
nhr-251	WBGene00022756	ZK488.4	-	-	-	0	0	0	0	0	0	0	0	0	0	0	0	0	0	0	0	0	0	0	0	0.193637
nhr-171	WBGene00016926	C54F6.8	0.207	0	0.3	0	0	0	0	0	0	0	0	0	0	0	0	0	0	0	0	0	0	0	0	0.190274
dpr-1	WBGene00001062	R10D12.2	-	-	-	0	0	0	0	0	0	0	0	0	0	0	0	0	0	0	0	0	0	0	0	0.189064
nhr-117	WBGene00003707	F16B4.12	0.138	0	0.12	0	0	0	0	0	0	0	0	0	0	0	0	0	0	0	0	0	0	0	0	0.188592
nhr-54	WBGene00003644	F36D3.2	0.207	0.193	0	0	0	0	0	0	0	0	0	0	0	0	0	0	0	0	0	0	0	0	0	0.187217
fax-1	WBGene00001400	F56E3.4	-	-	-	0	0	0	0	0	0	0	0	0	0	0	0	0	0	0	0	0	0	0	0	0.185471
ceh-52	WBGene00007416	C07E3.5	-	-	-	0	0	0	0	0	0	0	0	0	0	0	0	0	0	0	0	0	0	0	0	0.183927
pax-1	WBGene00003937	K07C11.1	0.138	0.128	0	0	0	0	0	0	0	0	0	0	0	0	0	0	0	0	0	0	0	0	0	0.183294
sta-1	WBGene00013111	Y51H4A.17	0.689	0.321	0.721	1	0	0	0	0	1	0	0	0	0	0	0	0	0	0	0	0	1	0	0	0.180483
odd-1	WBGene00003845	B0280.4	0.207	0.128	0.36	0	0	0	0	0	0	0	0	0	0	0	0	0	0	0	0	0	0	0	0	0.178016
nhr-119	WBGene00003709	K12H6.1	0	0	0.06	0	0	0	0	0	0	0	0	0	0	0	0	0	0	0	0	0	0	2	0	0.176138
nhr-115	WBGene00003705	T27B7.4	0.482	0.899	0.18	0	0	0	0	0	0	0	0	0	0	0	0	0	0	0	0	0	0	0	0	0.174806
nhr-80	WBGene00003670	H10E21.3	1.102	0.707	1.021	0	0	0	0	0	0	0	0	0	0	0	0	0	0	0	0	0	0	0	0	0.17415
hlh-31	WBGene00009540	F38C2.8	-	-	-	0	0	0	0	0	0	0	0	0	0	0	0	0	0	0	0	0	0	0	0	0.173786
nhr-163	WBGene00016368	C33G8.12	0	0	0.24	0	0	0	0	0	0	0	0	0	0	0	0	0	0	0	0	0	0	0	0	0.170903
nhr-120	WBGene00003710	C25B8.6	0.275	0.193	0.18	0	0	0	0	0	0	0	0	0	0	0	0	0	0	0	0	0	0	0	0	0.166818
nhr-107	WBGene00003697	C33G8.11	0.757	0.193	0.961	0	0	0	0	0	0	0	0	0	0	0	0	0	0	0	0	0	0	0	0	0.166545
nhr-281	WBGene00008884	F16B12.8	-	-	-	0	0	0	0	0	0	0	0	0	0	0	0	0	0	0	0	0	0	0	0	0.165075
mab-5	WBGene00003102	C08C3.3	-	-	-	0	0	0	0	0	1	0	0	0	0	0	0	0	0	0	0	0	0	0	0	0.164144
ceh-89	WBGene00009231	F28H6.2	0.275	0.257	0	0	0	0	0	0	0	0	0	0	0	0	0	0	0	0	0	0	0	0	0	0.161854
attf-1	WBGene00008092	C44F1.2	0.275	0	0.18	0	0	0	0	0	0	0	0	0	0	0	0	0	0	0	0	0	0	0	0	0.160997
pag-3	WBGene00003909	F45B8.4	-	-	-	0	0	0	0	0	0	0	0	0	0	0	0	0	0	0	0	0	0	0	0	0.155242
nhr-94	WBGene00003684	C12D5.8	0.482	0.385	0.66	0	0	0	0	0	0	0	0	0	0	0	0	0	0	0	0	0	0	0	0	0.150321
nhr-227	WBGene00020851	T27B7.5	-	-	-	0	0	0	0	0	0	0	0	0	0	0	0	0	0	0	0	0	0	0	0	0.149146
Y17G7B.22	WBGene00012473	Y17G7B.22	-	-	-	0	0	0	0	0	0	0	0	0	0	0	0	0	0	0	0	0	0	0	0	0.143981
nhr-90	WBGene00003680	ZK488.2	1.308	0.707	1.141	0	0	0	0	0	0	0	0	0	0	0	0	0	0	0	0	0	0	0	0	0.14068
ceh-5	WBGene00000430	C16C2.1	0	0.128	0.24	0	0	0	0	1	0	0	0	0	0	0	0	0	0	0	1	0	1	0	0	0.140621
nhr-30	WBGene00016091	C25E10.1	-	-	-	0	0	0	0	0	0	0	0	0	0	0	0	0	0	0	0	0	0	0	0	0.137946
nhr-53	WBGene00003643	K06B4.11	0.138	0	0	0	0	0	0	0	0	0	0	0	0	0	0	0	0	0	0	0	0	0	0	0.13774
unc-86	WBGene00006818	C30A5.7	-	-	-	0	0	0	0	0	0	0	0	0	0	0	0	0	0	0	0	0	0	0	0	0.136199
nhr-135	WBGene00003725	VC5.5	0.62	0.835	0.18	0	0	0	0	0	0	0	0	0	0	0	0	0	0	0	1	0	0	0	0	0.133209
nhr-98	WBGene00003688	M02H5.6	0.275	0.578	0.48	0	0	0	0	0	1	0	0	0	0	0	0	0	0	0	0	0	0	0	0	0.130391
nhr-221	WBGene00020748	T24A6.8	-	-	-	0	0	0	0	0	0	0	0	0	0	0	0	0	0	0	0	0	0	0	0	0.127438
unc-120	WBGene00006844	D1081.2	0.964	1.028	1.141	0	0	3	0	1	1	0	0	5	1	0	0	0	2	0	0	0	0	1	2	0.127393
aptf-4	WBGene00009202	F28C6.1	3.856	2.313	6.785	0	0	0	0	0	0	0	0	0	0	0	0	0	1	0	0	0	0	0	0	0.1259
nhr-150	WBGene00007367	C06B8.1	-	-	-	0	0	0	0	0	0	0	0	0	0	0	0	0	0	0	0	0	0	0	0	0.125498
nhr-238	WBGene00021611	Y46H3D.7	0.069	0.193	0.06	0	0	0	0	0	0	0	0	0	0	0	0	0	0	0	0	0	0	0	0	0.124946
sptf-1	WBGene00009743	F45H11.1	-	-	-	0	0	0	0	0	1	0	0	0	0	0	0	0	0	0	0	0	0	0	1	0.123523
hlh-34	WBGene00011327	T01D3.2	-	-	-	0	0	0	0	0	0	0	0	0	0	0	0	0	0	0	0	0	0	0	0	0.12162
nhr-269	WBGene00011150	R08H2.9	-	-	-	0	0	0	0	0	0	0	0	0	0	0	0	0	0	0	0	0	0	0	0	0.120769
ceh-31	WBGene00000452	C33D12.1	-	-	-	0	0	0	0	0	0	0	0	0	0	0	0	0	0	0	0	0	0	0	0	0.119908
fkh-8	WBGene00001440	F40H3.4	0.069	0	0.12	0	0	0	0	0	0	0	0	0	0	0	0	0	0	0	0	0	0	0	0	0.119908
nhr-130	WBGene00003720	T01G6.8	0.069	0.193	0.3	0	0	0	0	0	0	0	0	0	0	0	0	0	0	0	0	0	0	0	0	0.119839
nhr-74	WBGene00003664	C27C7.3	-	-	-	0	0	0	0	0	0	0	0	0	0	0	0	0	0	0	0	0	0	0	0	0.119324
nhr-125	WBGene00003715	R02D1.1	0.069	0.128	0.36	0	0	0	0	0	0	0	0	0	0	0	0	0	0	0	0	0	0	0	0	0.119153
npax-2	WBGene00018591	F48B9.5	-	-	-	0	0	0	0	0	0	0	0	0	0	0	0	0	0	0	0	0	0	0	0	0.118677
pqm-1	WBGene00004096	F40F8.7	0.689	0.45	0.42	0	0	0	0	0	0	0	0	0	0	0	0	0	0	0	0	0	0	0	0	0.118407
nhr-273	WBGene00020460	T12C9.1	-	-	-	0	0	0	0	0	0	0	0	0	0	0	0	0	0	0	0	0	0	0	0	0.118407
sknr-1	WBGene00020961	W02H5.7	-	-	-	0	0	0	0	0	0	0	0	0	0	0	0	0	0	0	0	0	0	0	0	0.118387
nhr-133	WBGene00003723	F44C8.8	5.371	5.204	6.065	0	0	0	0	0	0	0	0	0	0	0	0	0	0	0	0	0	0	1	0	0.117938
sox-3	WBGene00004950	F40E10.2	-	-	-	0	0	0	0	0	1	0	0	0	0	0	0	0	0	0	0	0	0	0	0	0.114815
nhr-87	WBGene00003677	Y41D4B.7	3.374	2.763	2.342	0	0	0	0	0	0	0	0	0	0	0	0	0	0	0	0	0	0	0	0	0.114762
nhr-9	WBGene00003608	ZK418.1	-	-	-	0	0	0	0	0	0	0	0	0	0	0	0	0	0	0	0	0	0	0	0	0.113547
nhr-216	WBGene00020385	T09D3.4	-	-	-	0	0	0	0	0	0	0	0	0	0	0	0	0	0	0	0	0	0	0	0	0.111854
nhr-174	WBGene00008474	E03H4.6	-	-	-	0	0	0	0	0	0	0	0	0	0	0	0	0	0	0	0	0	0	0	0	0.111674
nhr-188	WBGene00018544	F47C10.7	-	-	-	0	0	0	0	0	0	0	0	0	0	0	0	0	0	0	0	0	0	0	0	0.111536
hlh-26	WBGene00001965	C17C3.8	-	-	-	0	0	0	0	0	0	0	0	0	0	0	0	0	0	0	0	0	0	0	0	0.109156
dmd-5	WBGene00017326	F10C1.5	-	-	-	0	0	0	0	0	0	0	0	0	0	0	0	0	0	0	0	0	0	0	0	0.109156
tbx-43	WBGene00044798	Y46E12A.4	0	0	0.841	0	0	0	0	0	0	0	0	0	0	0	0	0	0	0	0	0	0	0	0	0.109041
ces-2	WBGene00000469	ZK909.4	0.551	0.321	0.961	1	0	0	0	0	5	0	0	0	1	0	0	0	0	0	1	0	1	0	0	0.107492
C09F5.3	WBGene00015649	C09F5.3	0.138	0.385	0	0	0	0	0	0	0	0	0	0	0	0	0	0	0	0	0	0	0	0	0	0.106011
ceh-27	WBGene00000449	F46F3.1	-	-	-	0	0	1	0	1	0	0	0	0	0	0	0	0	0	0	0	0	0	0	0	0.104849
nhr-277	WBGene00022374	Y94H6A.1	0.069	0	0	0	0	0	0	0	0	0	0	0	0	0	0	0	0	0	0	0	0	0	0	0.103418
npax-4	WBGene00007496	C09G9.7	0.207	0	0.12	0	0	0	0	0	0	0	0	0	0	0	0	0	0	0	0	0	0	0	0	0.102744
nhr-234	WBGene00012596	Y38E10A.18	-	-	-	0	0	0	0	0	0	0	0	0	0	0	0	0	0	0	0	0	0	0	0	0.101839
nhr-195	WBGene00019115	F59E11.10	0.069	0	0.06	0	0	0	0	0	0	0	0	0	0	0	0	0	0	0	0	0	0	0	0	0.101675
nhr-43	WBGene00003633	C29E6.5	0.069	0.064	0.36	0	0	0	0	0	0	0	0	0	0	0	0	0	0	0	0	0	0	0	0	0.0987249
mls-2	WBGene00003377	C39E6.4	0	0	0	0	0	0	0	0	0	0	0	0	0	0	0	0	0	1	0	0	0	0	0	0.097636
nhr-229	WBGene00013795	Y116A8C.18	-	-	-	0	0	0	0	0	0	0	0	0	0	0	0	0	0	0	0	0	0	0	0	0.0956617
nhr-126	WBGene00003716	F44C8.10	0.138	0	0.12	0	0	0	0	0	0	0	0	0	0	0	0	0	0	0	0	0	0	0	0	0.0956178
fkh-2	WBGene00001434	T14G12.4	0	0	0	0	0	0	0	0	0	0	1	0	0	0	0	0	0	0	0	0	0	0	0	0.0952022
nhr-247	WBGene00014193	ZK1037.5	-	-	-	0	0	0	0	0	0	0	0	0	0	0	0	0	0	0	0	0	0	0	0	0.0936484
vab-15	WBGene00006881	R07B1.1	-	-	-	0	0	0	0	0	0	0	0	0	0	0	0	0	0	0	0	0	0	0	0	0.088166
nhr-201	WBGene00019741	M02H5.3	0.069	0	0.06	0	0	0	0	0	0	0	0	0	0	0	0	0	0	0	0	0	0	0	0	0.0875725
T06G6.5	WBGene00011547	T06G6.5	-	-	-	0	0	0	0	0	0	0	0	0	0	0	0	0	0	0	0	0	0	0	0	0.0868418
nhr-184	WBGene00018415	F44C8.9	0	0.257	0.18	0	0	0	0	0	0	0	0	0	0	0	0	0	0	0	0	0	0	0	0	0.0863823
nhr-179	WBGene00017512	F16B4.11	0.069	0.257	0.06	0	0	0	0	0	0	0	0	0	0	0	0	0	0	0	0	0	0	0	0	0.086266
nhr-141	WBGene00017787	F25E5.6	0	0.064	0.06	0	0	0	0	0	0	0	0	0	0	0	0	0	0	0	0	0	0	0	0	0.0849979
hlh-17	WBGene00001961	F38C2.2	-	-	-	0	0	0	0	0	0	0	0	0	0	0	0	0	0	0	0	0	0	0	0	0.0817367
zip-6	WBGene00011130	R07H5.10	-	-	-	0	0	0	0	0	0	0	0	0	0	0	0	0	0	0	0	0	0	0	0	0.0814716
che-1	WBGene00000483	C55B7.12	0	0.064	0.06	0	0	0	0	0	0	0	0	0	0	0	0	0	0	0	0	0	0	0	0	0.07977
nhr-172	WBGene00016927	C54F6.9	-	-	-	0	0	0	0	0	0	0	0	0	0	0	0	0	0	0	0	0	0	0	0	0.0797628
zip-3	WBGene00012330	W07G1.3	4.063	2.891	3.483	0	0	0	0	0	1	0	0	0	0	0	0	0	0	0	0	0	0	0	0	0.0797547
nhr-134	WBGene00003724	F44C8.2	2.41	3.212	2.942	0	0	0	0	0	0	0	0	0	2	0	0	0	0	0	0	0	0	0	0	0.0793292
lin-48	WBGene00003033	F34D10.5	0.138	0.257	0.66	0	0	0	0	0	0	0	0	0	0	0	0	0	0	0	0	0	0	0	0	0.0778459
dmd-3	WBGene00012832	Y43F8C.10	0.069	0.064	0.18	0	0	0	0	0	0	0	0	0	0	0	0	0	0	0	0	0	0	0	0	0.0758048
cky-1	WBGene00000521	C15C8.2	-	-	-	0	0	0	0	0	0	0	0	0	0	0	0	0	0	0	0	0	0	0	0	0.0756945
tbx-7	WBGene00006544	ZK328.8	0.138	0.128	0.06	0	0	0	0	0	0	0	0	0	0	0	0	0	0	0	0	0	0	0	0	0.075148
sdz-38	WBGene00014131	ZK892.7	0.275	0.193	0.66	0	0	0	0	0	0	0	0	0	1	0	0	0	0	0	0	1	0	0	0	0.0731155
ceh-48	WBGene00015934	C17H12.9	1.446	0.064	0.961	0	0	0	0	0	0	0	0	0	0	0	0	0	0	0	0	0	0	0	0	0.0728341
nhr-67	WBGene00003657	C08F8.8	0.069	0	0	0	0	1	0	0	0	0	0	0	0	0	0	0	0	2	0	0	0	0	0	0.0713854
tbx-38	WBGene00006557	C24H11.3	-	-	-	0	0	0	0	0	0	0	0	0	0	0	0	0	0	0	0	0	0	0	0	0.0705866
dsc-1	WBGene00001096	C18B12.3	-	-	-	0	0	0	0	0	0	0	0	0	0	0	0	0	0	0	0	0	0	0	0	0.0681597
aptf-1	WBGene00019424	K06A1.1	-	-	-	0	0	0	0	0	0	0	0	0	0	0	0	0	0	0	0	0	0	0	0	0.0680039
nhr-218	WBGene00011750	T13F3.2	-	-	-	0	0	0	0	0	0	0	0	0	0	0	0	0	0	0	0	0	0	0	0	0.0668679
nhr-38	WBGene00003629	K01H12.3	0	0	0.24	0	0	0	0	0	0	0	0	0	0	0	0	0	0	0	0	0	0	0	0	0.0663352
tbx-32	WBGene00006551	ZK380.1	-	-	-	0	0	0	0	0	0	0	0	0	0	0	0	0	0	0	0	0	0	0	0	0.0662297
tbx-35	WBGene00006554	ZK177.10	-	-	-	0	0	0	0	0	0	0	0	0	0	0	0	0	0	0	0	0	0	0	0	0.0621373
dmd-10	WBGene00007929	C34D1.1	-	-	-	0	0	0	0	0	0	0	0	0	0	0	0	0	0	0	0	0	0	0	0	0.0618603
nhr-210	WBGene00020015	R11G11.12	0.069	0.257	0.06	0	0	0	0	0	0	0	0	0	0	0	0	0	0	0	0	0	0	0	0	0.0602314
nhr-258	WBGene00016126	C26B2.4	-	-	-	0	0	0	0	0	0	0	0	0	0	0	0	0	0	0	0	0	0	0	0	0.058439
nhr-254	WBGene00022640	ZK6.5	-	-	-	0	0	0	0	0	0	0	0	0	0	0	0	0	0	0	0	0	0	0	0	0.0579832
nhr-193	WBGene00010215	F57G8.6	0.069	0.193	0	0	0	0	0	0	0	0	0	0	0	0	0	0	0	0	0	0	0	0	0	0.0579348
nhr-129	WBGene00003719	C50B6.14	0.138	0.193	0.24	0	0	0	0	0	1	0	0	0	0	0	0	0	0	0	0	0	0	0	0	0.057742
eyg-1	WBGene00013147	Y53C12C.1	-	-	-	0	0	0	0	0	0	0	0	0	0	0	0	0	0	0	0	0	0	0	0	0.0568587
nhr-147	WBGene00015395	C03G6.8	-	-	-	0	0	0	0	0	0	0	0	0	0	0	0	0	0	0	0	0	0	0	0	0.0562138
F21G4.5	WBGene00009026	F21G4.5	0.138	0.514	0.18	0	0	0	0	0	0	0	0	0	0	0	0	0	0	0	0	0	0	0	0	0.0560172
unc-39	WBGene00006775	F56A12.1	-	-	-	0	0	0	0	0	0	0	0	0	0	0	0	0	0	0	0	0	0	0	0	0.0554945
nhr-189	WBGene00018545	F47C10.8	-	-	-	0	0	0	0	0	0	0	0	0	0	0	0	0	0	0	0	0	0	0	0	0.0551855
cog-1	WBGene00000584	R03C1.3	0.069	0	0.12	0	0	1	0	0	0	0	0	0	0	0	0	0	0	2	0	1	0	0	0	0.0545778
ceh-34	WBGene00000455	C10G8.6	-	-	-	0	0	0	0	0	0	0	0	0	0	0	0	0	0	0	0	0	0	0	0	0.0539274
tbx-37	WBGene00006556	Y47D3A.12	-	-	-	0	0	0	0	0	0	0	0	0	0	0	0	0	0	0	0	0	0	0	0	0.0515502
nhr-72	WBGene00003662	C17A2.8	-	-	-	0	0	0	0	0	0	0	0	0	0	0	0	0	0	0	0	0	0	0	0	0.0512204
C28G1.4	WBGene00016189	C28G1.4	0.689	0.771	1.621	0	0	0	0	0	0	0	0	0	1	0	0	0	0	0	0	1	0	0	1	0.0474168
nhr-157	WBGene00015900	C17E7.5	-	-	-	0	0	0	0	0	0	0	0	0	0	0	0	0	0	0	0	0	0	0	0	0.0472339
nhr-253	WBGene00022639	ZK6.4	-	-	-	0	0	0	0	0	0	0	0	0	0	0	0	0	0	0	0	0	0	0	0	0.0393795
ceh-63	WBGene00045215	C02F12.10	-	-	-	0	0	0	0	0	0	0	0	0	0	0	0	0	0	0	1	0	0	0	0	0.0387563
nhr-175	WBGene00008630	F09F3.10	0.069	0	0.06	0	0	0	0	0	0	0	0	0	0	0	0	0	0	0	0	0	0	0	0	0.0373381
nhr-113	WBGene00003703	ZK1025.9	-	-	-	0	0	0	0	0	0	0	0	0	0	0	0	0	0	0	0	0	0	0	0	0.0362964
ZK1037.13	WBGene00045515	ZK1037.13	-	-	-	0	0	0	0	0	0	0	0	0	0	0	0	0	0	0	0	0	0	0	0	0.0360325
nhr-272	WBGene00011565	T07C5.2	-	-	-	0	0	0	0	0	0	0	0	0	0	0	0	0	0	0	0	0	0	0	0	0.0344521
nhr-275	WBGene00021163	Y5H2A.2	-	-	-	0	0	0	0	0	0	0	0	0	0	0	0	0	0	0	0	0	0	0	0	0.0334179
unc-4	WBGene00006744	F26C11.2	-	-	-	0	0	0	0	0	0	0	0	0	0	0	0	0	0	0	0	0	0	0	0	0.0297754
nhr-3	WBGene00003602	H01A20.1	2.204	0.964	1.741	1	0	0	0	1	2	1	2	1	1	0	0	0	0	2	1	0	0	0	0	0.0277732
ceh-7	WBGene00000432	C34C6.8	-	-	-	0	0	0	0	0	0	0	0	0	0	0	0	0	0	0	0	0	0	0	0	0
ceh-12	WBGene00000436	F33D11.4	-	-	-	0	0	0	0	0	0	0	0	0	0	0	0	0	0	0	0	0	0	0	0	0
ceh-17	WBGene00000440	D1007.1	-	-	-	0	0	0	0	0	0	0	0	0	0	0	0	0	0	0	0	0	0	0	0	0
ceh-22	WBGene00000445	F29F11.5	-	-	-	0	0	1	0	0	0	0	0	0	0	0	0	0	0	0	0	0	0	0	0	0
ceh-23	WBGene00000446	ZK652.5	-	-	-	0	0	0	0	0	0	0	0	0	0	0	0	0	0	0	0	0	0	0	0	0
ceh-24	WBGene00000447	F55B12.1	-	-	-	0	0	0	0	1	0	0	0	0	0	0	0	0	0	0	0	0	0	0	0	0
ceh-28	WBGene00000450	K03A11.3	-	-	-	0	0	0	0	0	0	0	0	0	0	0	0	0	0	0	0	0	0	0	0	0
ceh-33	WBGene00000454	C10G8.7	0.069	0	0	0	0	0	0	0	0	0	0	0	0	0	0	0	0	0	0	0	0	0	0	0
ceh-36	WBGene00000457	C37E2.4	-	-	-	0	0	0	0	0	0	0	0	0	0	0	0	0	1	0	0	0	0	0	0	0
ces-1	WBGene00000468	F43G9.11	0.138	0.064	0.24	0	0	0	0	0	0	0	0	0	0	0	0	0	0	0	0	0	0	0	0	0
egl-5	WBGene00001174	C08C3.1	-	-	-	0	0	0	0	0	0	0	0	0	0	0	0	0	0	0	0	0	0	0	0	0
ehn-3	WBGene00001223	ZK616.10	-	-	-	0	0	0	0	0	0	0	0	0	0	0	0	0	0	0	0	0	0	0	0	0
elt-4	WBGene00001252	C39B10.6	-	-	-	0	0	0	0	0	0	0	0	0	0	0	0	0	0	0	0	0	0	0	0	0
end-1	WBGene00001310	F58E10.2	0.069	0.128	0.06	0	0	0	0	0	0	0	1	0	0	0	0	0	0	0	0	0	0	0	0	0
fkh-5	WBGene00001437	F26A1.2	0.964	0.899	0.781	0	0	0	0	0	0	0	1	0	0	0	0	0	0	0	0	0	0	0	0	0
hlh-3	WBGene00001950	T24B8.6	0.895	0.707	1.321	0	0	0	0	1	0	0	0	1	2	0	0	0	0	1	1	1	1	1	0	0
hlh-10	WBGene00001954	ZK682.4	-	-	-	0	0	0	0	0	0	0	0	0	0	0	0	0	0	0	0	0	0	0	0	0
hlh-12	WBGene00001956	C28C12.8	1.722	2.891	0.961	0	0	0	0	0	0	0	1	0	1	0	0	0	0	0	0	0	0	0	0	0
hlh-13	WBGene00001957	F48D6.3	-	-	-	0	0	0	0	0	0	1	0	0	0	0	0	0	0	0	0	0	0	0	0	0
hlh-15	WBGene00001959	C43H6.8	-	-	-	0	0	0	0	0	0	0	0	0	0	0	0	0	0	0	0	0	0	0	0	0
hlh-19	WBGene00001962	F57C12.3	-	-	-	0	0	0	0	0	0	0	0	0	0	0	0	0	0	0	0	0	0	0	0	0
hlh-25	WBGene00001964	C17C3.7	-	-	-	0	0	0	0	0	0	0	0	0	0	0	0	0	0	0	0	0	0	0	0	0
hlh-28	WBGene00001967	F31A3.2	0.138	0.064	0.06	0	0	0	0	0	0	0	0	0	0	0	0	0	0	0	0	0	0	0	0	0
hlh-29	WBGene00001968	F31A3.4	-	-	-	0	0	0	0	0	0	0	0	0	0	0	0	0	0	0	0	0	0	0	0	0
lin-32	WBGene00003018	T14F9.5	0.069	0.064	0	0	1	0	0	1	0	0	0	0	0	0	0	0	0	0	0	0	0	0	0	0
mab-9	WBGene00003106	T27A1.6	-	-	-	0	0	0	0	0	0	0	0	0	0	0	0	0	0	0	0	0	0	0	0	0
med-1	WBGene00003180	T24D3.1	-	-	-	0	0	0	0	0	0	0	0	0	0	0	0	0	0	0	0	0	0	0	0	0
mls-1	WBGene00003376	H14A12.4	-	-	-	0	0	0	0	0	0	0	0	0	0	0	0	0	0	0	0	0	0	0	0	0
nhr-16	WBGene00003615	T12C9.6	0.482	0.385	1.021	1	0	0	0	0	0	0	0	0	0	0	0	0	0	0	0	0	0	0	0	0
nhr-18	WBGene00003617	F44C8.3	0.62	0.064	0.18	0	0	0	0	0	0	0	0	0	0	0	0	0	0	0	0	0	0	0	0	0
nhr-51	WBGene00003641	K06B4.1	-	-	-	0	0	0	0	0	0	0	0	0	0	0	0	0	0	0	0	0	0	0	0	0
nhr-52	WBGene00003642	K06B4.2	-	-	-	0	0	0	0	0	0	0	0	0	0	0	0	0	0	0	0	0	0	0	0	0
nhr-55	WBGene00003645	T01G6.7	0.62	0.064	0.36	0	0	0	0	0	0	0	0	0	0	0	0	0	0	0	0	0	0	0	0	0
nhr-56	WBGene00003646	F44C8.6	2.548	1.028	1.381	0	0	0	0	0	4	2	0	3	0	0	0	0	0	0	0	0	0	0	0	0
nhr-58	WBGene00003648	R11G11.2	0.757	0.514	1.141	0	0	0	0	0	0	0	0	0	0	0	0	0	0	0	0	0	0	0	0	0
nhr-73	WBGene00003663	C27C7.4	-	-	-	0	0	0	0	0	0	0	0	0	0	0	0	0	0	0	0	0	0	0	0	0
nhr-77	WBGene00003667	T15D6.6	-	-	-	0	0	0	0	0	0	0	0	0	0	0	0	0	0	0	0	0	0	0	0	0
nhr-81	WBGene00003671	C47F8.8	0.069	0.193	0	0	0	0	0	0	0	0	0	0	0	0	0	0	0	0	0	0	0	0	0	0
nhr-82	WBGene00003672	F41D3.1	-	-	-	0	0	0	0	0	0	0	0	0	0	0	0	0	0	0	0	0	0	0	0	0
nhr-89	WBGene00003679	E03H4.13	-	-	-	0	0	0	0	0	0	0	0	0	0	0	0	0	0	0	0	0	0	0	0	0
nhr-92	WBGene00003682	Y41D4B.8	0.344	0.257	1.381	0	0	0	0	0	0	0	0	0	0	0	0	0	0	0	0	0	0	0	0	0
nhr-96	WBGene00003686	F44C8.11	0.62	0.514	0.24	0	0	0	0	0	0	0	0	0	0	0	0	0	0	0	1	0	0	0	0	0
nhr-99	WBGene00003689	M02H5.1	0.344	0.128	0	0	0	0	0	0	0	0	0	0	0	0	0	0	0	0	0	0	0	0	0	0
nhr-106	WBGene00003696	T01G6.4	0.069	0	0.42	0	0	0	0	0	0	0	0	0	0	0	0	0	0	0	0	0	0	0	0	0
nhr-108	WBGene00003698	F35E8.12	0.344	0.514	0.36	0	0	0	0	0	0	0	0	0	0	0	0	0	0	0	0	0	0	0	0	0
nhr-110	WBGene00003700	Y46H3D.5	0.069	0	0.06	0	0	0	0	0	0	0	0	0	0	0	0	0	0	0	0	0	0	0	0	0
nhr-112	WBGene00003702	Y70C5C.6	0.275	0.128	0.06	0	0	0	0	0	0	0	0	0	1	0	0	0	0	0	0	0	0	0	0	0
nhr-116	WBGene00003706	F09C6.9	1.171	1.028	0.961	0	0	0	0	0	2	0	0	0	0	0	0	0	0	0	0	0	0	0	0	0
nhr-118	WBGene00003708	F13A2.8	-	-	-	0	0	0	0	0	0	0	0	0	0	0	0	0	0	0	0	0	0	0	0	0
nhr-123	WBGene00003713	M02H5.7	0.069	0	0.24	0	0	0	0	0	0	0	0	0	1	0	0	0	0	0	1	1	0	0	0	0
nhr-127	WBGene00003717	T13F3.3	-	-	-	0	0	0	0	0	0	0	0	0	0	0	0	0	0	0	0	0	0	0	0	0
nhr-131	WBGene00003721	T01G6.2	1.171	0.899	1.681	0	0	0	0	1	0	0	0	1	0	0	0	0	0	0	0	0	0	0	0	0
nhr-136	WBGene00003726	C13C4.3	0.551	0.707	2.042	0	0	0	0	0	0	0	1	0	0	0	0	0	0	0	0	0	0	0	0	0
odd-2	WBGene00003846	C34H3.2	0.551	0.257	0.3	0	0	0	0	0	0	0	0	0	0	0	0	0	0	0	0	0	0	0	0	0
odr-7	WBGene00003854	T18D3.2	-	-	-	0	0	0	0	0	0	0	0	0	0	0	0	0	0	0	0	0	0	0	0	0
pes-1	WBGene00003976	T28H11.4	0.826	0.771	1.321	0	0	0	0	0	4	0	1	0	0	0	0	0	0	0	5	0	0	1	0	0
php-3	WBGene00004024	Y75B8A.1	0.138	0	0.06	0	0	1	0	0	1	0	0	0	0	0	0	0	0	0	1	0	0	0	0	0
tab-1	WBGene00006380	F31E8.3	-	-	-	0	0	0	0	0	0	0	0	0	0	0	0	0	0	0	0	0	0	0	0	0
tbx-30	WBGene00006549	Y59E9AR.3	-	-	-	0	0	0	0	0	0	0	0	0	0	0	0	0	0	0	0	0	0	0	0	0
tbx-31	WBGene00006550	C36C9.2	-	-	-	0	0	0	0	0	0	0	0	0	0	0	0	0	0	0	0	0	0	0	0	0
tbx-34	WBGene00006553	Y47D3A.10	16.389	1.542	7.145	0	0	0	0	0	0	0	0	0	0	0	0	0	0	0	0	0	0	0	0	0
tbx-39	WBGene00006558	Y73F8A.16	0.069	0.064	0	0	0	0	0	0	0	0	0	0	0	0	0	0	0	0	0	0	0	0	0	0
tbx-40	WBGene00006559	Y73F8A.17	0.069	0.064	0.06	0	0	0	0	0	0	0	0	0	0	0	0	0	0	0	0	0	0	0	0	0
tbx-41	WBGene00006560	T26C11.1	-	-	-	0	0	0	0	0	0	0	0	0	0	0	0	0	0	0	0	0	0	0	0	0
nhr-153	WBGene00007546	C13C4.1	0.344	0.45	0.721	0	0	0	0	0	0	0	0	0	0	0	0	0	0	0	0	0	0	0	0	0
dmd-4	WBGene00007776	C27C12.6	-	-	-	0	0	0	0	0	0	0	0	0	0	0	0	0	0	0	0	0	0	0	0	0
dmd-11	WBGene00007930	C34D1.2	-	-	-	0	0	0	0	0	0	0	0	0	0	0	0	0	0	0	0	0	0	0	0	0
nhr-164	WBGene00008056	C41G6.5	-	-	-	0	0	0	0	0	0	0	0	0	0	0	0	0	0	0	0	0	0	0	0	0
ceh-88	WBGene00008195	C49C3.5	0.482	1.413	0.721	1	0	0	0	1	4	1	1	1	2	0	0	0	0	1	7	0	0	1	0	0
nhr-167	WBGene00008208	C49F5.4	-	-	-	0	0	0	0	0	0	0	0	0	0	0	0	0	0	0	0	0	0	0	0	0
ceh-75	WBGene00008242	C50H2.6	-	-	-	0	0	0	0	0	0	0	0	0	0	0	0	0	0	0	0	0	0	0	0	0
nhr-262	WBGene00008619	F09C6.8	-	-	-	0	0	0	0	0	0	0	0	0	0	0	0	0	0	0	0	0	0	0	0	0
nhr-264	WBGene00008778	F14A5.1	-	-	-	0	0	0	0	0	0	0	0	0	0	0	0	0	0	0	0	0	0	0	0	0
nhr-176	WBGene00008830	F14H3.11	0.069	0.193	0.18	0	0	0	0	0	0	0	0	0	0	0	0	0	0	0	0	0	0	0	0	0
F21D5.9	WBGene00009014	F21D5.9	0.138	0	0.12	0	0	0	0	0	0	0	0	0	0	0	0	0	0	0	0	0	0	0	0	0
nhr-265	WBGene00009608	F41D3.3	-	-	-	0	0	0	0	0	0	0	0	0	0	0	0	0	0	0	0	0	0	0	0	0
klf-2	WBGene00009998	F53F8.1	0.138	0	0	0	0	0	0	0	0	0	0	0	0	0	0	0	0	0	0	0	0	0	0	0
nhr-192	WBGene00010180	F57A8.5	-	-	-	0	0	0	0	0	0	0	0	0	0	0	0	0	0	0	0	0	0	0	0	0
nhr-283	WBGene00010186	F57A10.6	-	-	-	0	0	0	0	0	0	0	0	0	0	0	0	0	0	0	0	0	0	0	0	0
H16D19.3	WBGene00010401	H16D19.3	-	-	-	0	0	0	0	0	0	0	0	0	0	0	0	0	0	0	0	0	0	0	0	0
nhr-267	WBGene00010410	H22D14.1	-	-	-	0	0	0	0	0	0	0	0	0	0	0	0	0	0	0	0	0	0	0	0	0
nhr-268	WBGene00010601	K06B4.6	-	-	-	0	0	0	0	0	0	0	0	0	0	0	0	0	0	0	0	0	0	0	0	0
nhr-197	WBGene00010602	K06B4.7	-	-	-	0	0	0	0	0	0	0	0	0	0	0	0	0	0	0	0	0	0	0	0	0
nhr-198	WBGene00010603	K06B4.8	-	-	-	0	0	0	0	0	0	0	0	0	0	0	0	0	0	0	0	0	0	0	0	0
nhr-199	WBGene00010604	K06B4.10	-	-	-	0	0	0	0	0	0	0	0	0	0	0	0	0	0	0	0	0	0	0	0	0
nhr-205	WBGene00011002	R04B5.3	0.275	0.064	0.12	0	0	0	0	0	0	0	0	0	0	0	0	0	0	0	0	0	0	0	0	0
nhr-206	WBGene00011097	R07B7.13	0.895	1.67	1.801	0	0	0	0	0	0	0	0	0	0	0	0	0	0	0	0	0	0	0	0	0
nhr-208	WBGene00011099	R07B7.15	0.482	0.193	0.36	0	0	0	0	0	0	0	0	0	0	0	0	0	0	0	0	0	0	0	0	0
npax-3	WBGene00011257	R13.2	-	-	-	0	0	0	0	0	0	0	0	0	0	0	0	0	0	0	0	0	0	0	0	0
mbr-1	WBGene00011315	T01C1.2	10.88	15.355	5.644	0	0	0	0	0	0	0	0	0	0	0	0	0	0	0	0	0	0	3	2	0
nhr-271	WBGene00011396	T03E6.3	-	-	-	0	0	0	0	0	0	0	0	0	0	0	0	0	0	0	0	0	0	0	0	0
nhr-214	WBGene00011566	T07C5.3	-	-	-	0	0	0	0	0	0	0	0	0	0	0	0	0	0	0	0	0	0	0	0	0
nhr-215	WBGene00011567	T07C5.4	-	-	-	0	0	0	0	0	0	0	0	0	0	0	0	0	0	0	0	0	0	0	0	0
madf-4	WBGene00011575	T07C12.11	0.344	0.45	1.381	0	0	0	0	0	0	0	0	0	0	0	0	0	0	0	0	0	0	0	0	0
T07D10.3	WBGene00011583	T07D10.3	0.344	0.193	0.24	0	0	0	0	0	0	0	0	0	1	0	0	0	0	0	0	0	0	0	0	0
T08G5.7	WBGene00011626	T08G5.7	-	-	-	0	0	0	0	0	0	0	0	0	0	0	0	0	0	0	0	0	0	0	0	0
nhr-217	WBGene00011651	T09E11.2	-	-	-	0	0	0	0	0	0	0	0	0	0	0	0	0	0	0	0	0	0	0	0	0
T22C8.4	WBGene00011925	T22C8.4	1.515	0.642	1.141	0	0	0	0	0	0	0	0	1	0	0	0	0	0	0	0	0	0	0	0	0
nhr-223	WBGene00012050	T26E4.8	-	-	-	0	0	0	0	0	0	0	0	0	0	0	0	0	0	0	0	0	0	0	0	0
nhr-285	WBGene00012056	T26E4.16	-	-	-	0	0	0	0	0	0	0	0	0	0	0	0	0	0	0	0	0	0	0	0	0
nhr-276	WBGene00013512	Y71A12C.1	-	-	-	0	0	0	0	0	0	0	0	0	0	0	0	0	0	0	0	0	0	0	0	0
hlh-32	WBGene00013665	Y105C5B.29	-	-	-	0	0	0	0	0	0	0	0	0	0	0	0	0	0	0	0	0	0	0	0	0
nhr-248	WBGene00013940	ZK218.6	-	-	-	0	0	0	0	0	0	0	0	0	0	0	0	0	0	0	0	0	0	0	0	0
nhr-255	WBGene00014068	ZK678.2	-	-	-	0	0	0	0	0	0	0	0	0	0	0	0	0	0	0	0	0	0	0	0	0
nhr-245	WBGene00014189	ZK1025.10	-	-	-	0	0	0	0	0	0	0	0	0	0	0	0	0	0	0	0	0	0	0	0	0
nhr-148	WBGene00015396	C03G6.10	0.069	0	0.24	0	0	0	0	0	0	0	0	0	0	0	0	0	0	0	0	0	0	0	0	0
nhr-149	WBGene00015397	C03G6.12	-	-	-	0	0	0	0	0	0	0	0	0	0	0	0	0	0	0	0	0	0	0	0	0
C06E2.1	WBGene00015527	C06E2.1	0.275	0.385	0.18	0	0	0	0	1	0	0	0	0	0	0	0	0	0	0	0	0	0	0	0	0
nhr-155	WBGene00015758	C14C6.4	-	-	-	0	0	0	0	0	0	0	0	0	0	0	0	0	0	0	0	0	0	0	0	0
nhr-257	WBGene00015869	C17A2.1	-	-	-	0	0	0	0	0	0	0	0	0	0	0	0	0	0	0	0	0	0	0	0	0
nhr-156	WBGene00015897	C17E7.1	0	0	0	0	0	0	0	0	0	0	0	0	0	0	0	0	0	0	0	0	0	0	0	0
nhr-158	WBGene00015901	C17E7.6	1.102	1.221	0.48	0	0	0	0	0	0	0	0	0	0	0	0	0	0	0	1	0	0	0	0	0
srt-58	WBGene00016233	C29G2.5	-	-	-	0	0	0	0	0	0	0	0	0	0	0	0	0	0	0	0	0	0	0	0	0
nhr-139	WBGene00016365	C33G8.8	0.069	0.064	0	2	0	0	0	0	0	0	0	0	0	0	0	0	0	0	0	0	0	0	0	0
nhr-140	WBGene00016366	C33G8.9	0	0.064	0.06	0	0	0	0	0	0	0	0	0	0	0	0	0	0	0	0	0	0	0	0	0
nhr-162	WBGene00016367	C33G8.10	0	0.064	0.12	0	0	0	0	0	0	0	0	0	0	0	0	0	0	0	0	0	0	0	0	0
nhr-260	WBGene00016517	C38C3.9	-	-	-	0	0	0	0	0	0	0	0	0	0	0	0	0	0	0	0	0	0	0	0	0
ets-5	WBGene00016600	C42D8.4	3.512	2.249	3.603	0	0	0	1	0	0	0	0	0	0	0	0	0	0	0	0	0	0	0	0	0
nhr-166	WBGene00016772	C49D10.2	-	-	-	0	0	0	0	0	0	0	0	0	0	0	0	0	0	0	0	0	0	0	0	0
nhr-261	WBGene00016777	C49D10.9	-	-	-	0	0	0	0	0	0	0	0	0	0	0	0	0	0	0	0	0	0	0	0	0
ets-9	WBGene00016865	C52B9.2	-	-	-	0	0	0	0	0	0	0	0	0	0	0	0	0	0	0	0	0	0	0	0	0
ets-10	WBGene00016870	C52B9.11	0	0.064	0.06	0	0	0	0	0	0	0	0	0	0	0	0	0	0	0	0	0	0	0	0	0
scrt-1	WBGene00016948	C55C2.1	-	-	-	0	0	0	0	0	0	0	0	0	0	0	0	0	0	0	0	0	0	0	0	0
sdz-12	WBGene00017406	F12E12.5	0	0.771	0	0	0	0	0	0	0	0	0	0	0	0	0	0	0	0	0	0	0	0	0	0
F19F10.1	WBGene00017598	F19F10.1	0	0.257	0.42	0	0	0	0	0	0	0	0	0	0	0	0	0	0	0	0	0	0	0	0	0
ets-7	WBGene00017601	F19F10.5	-	-	-	0	0	0	0	0	0	0	0	0	0	0	0	0	0	0	0	0	0	0	0	0
npax-1	WBGene00017664	F21D12.5	-	-	-	0	0	0	0	0	0	0	0	0	0	0	0	0	0	0	0	0	0	0	0	0
ceh-87	WBGene00018022	F34D6.2	-	-	-	0	0	0	0	0	0	0	0	0	0	0	0	0	0	0	0	0	0	0	0	0
nhr-183	WBGene00018266	F41B5.10	0.344	0.321	0.06	0	0	0	0	0	0	0	0	0	0	0	0	0	0	0	0	0	0	0	0	0
nhr-39	WBGene00018404	F44A2.4	-	-	-	0	0	0	0	0	0	0	0	0	0	0	0	0	0	0	0	0	0	0	0	0
nhr-37	WBGene00018412	F44C4.2	-	-	-	0	0	0	0	0	0	0	0	0	0	0	0	0	0	0	0	0	0	0	0	0
ceh-81	WBGene00018434	F45C12.3	-	-	-	0	0	0	0	0	0	0	0	0	0	0	0	0	0	0	0	0	0	0	0	0
nhr-185	WBGene00018539	F47C10.1	-	-	-	0	0	0	0	0	0	0	0	0	0	0	0	0	0	0	0	0	0	0	0	0
nhr-186	WBGene00018541	F47C10.3	-	-	-	0	0	0	0	0	0	0	0	0	0	0	0	0	0	0	0	0	0	0	0	0
nhr-187	WBGene00018542	F47C10.4	-	-	-	0	0	0	0	0	0	0	0	0	0	0	0	0	0	0	0	0	0	0	0	0
nhr-143	WBGene00019116	F59E11.11	0.138	0.578	1.861	1	1	0	0	0	0	0	0	0	0	0	0	0	0	0	0	0	0	0	0	0
nhr-202	WBGene00019742	M02H5.4	0	0	0.3	0	0	0	0	0	0	0	0	0	0	0	0	0	0	0	0	0	0	0	0	0
nhr-270	WBGene00020062	R13D11.8	-	-	-	0	0	0	1	0	0	0	0	0	0	0	0	0	0	0	0	0	0	0	0	0
nhr-211	WBGene00020152	T01G6.5	0.069	0	0.24	0	0	0	0	0	0	0	0	0	0	0	0	0	0	0	0	0	0	0	0	0
nhr-212	WBGene00020153	T01G6.6	0.275	0.064	0.6	0	0	0	1	0	0	0	0	0	0	0	0	0	0	0	0	1	0	0	0	0
ceh-54	WBGene00020485	T13C5.4	-	-	-	0	0	0	0	0	0	0	0	0	0	0	0	0	0	0	0	0	0	0	0	0
nhr-225	WBGene00020849	T27B7.2	0.62	1.028	1.201	0	0	0	0	0	0	0	0	0	0	0	0	0	0	0	0	0	0	0	0	0
nhr-226	WBGene00020850	T27B7.3	0.689	0.45	0.721	0	0	0	0	0	0	0	0	0	0	0	0	0	0	0	0	0	0	0	0	0
Y22D7AL.16	WBGene00021254	Y22D7AL.16	-	-	-	0	0	0	0	0	0	0	0	0	0	0	0	0	0	0	0	0	0	0	0	0
tbx-42	WBGene00022000	Y59E9AR.5	-	-	-	0	0	0	0	0	0	0	0	0	0	0	0	0	0	0	0	0	0	0	0	0
nhr-242	WBGene00022097	Y69A2AR.26	-	-	-	0	0	0	0	0	0	0	0	0	0	0	0	0	0	0	0	0	0	0	0	0
Y82E9BR.1	WBGene00022334	Y82E9BR.1	0.551	0.964	1.321	0	0	0	0	0	0	0	0	0	0	0	0	0	0	0	1	0	0	1	0	0
nhr-252	WBGene00022637	ZK6.2	-	-	-	0	0	0	0	0	0	0	0	0	0	0	0	0	0	0	0	0	0	0	0	0
ZK177.3	WBGene00022671	ZK177.3	-	-	-	0	0	0	0	0	0	0	0	0	0	0	0	0	0	0	0	0	0	0	0	0
ceh-45	WBGene00022837	ZK993.1	0	0	0.24	0	0	0	0	0	0	0	0	0	0	0	0	0	0	0	0	0	0	0	0	0
ZK177.11	WBGene00044390	ZK177.11	-	-	-	0	0	0	0	0	0	0	0	0	0	0	0	0	0	0	0	0	0	0	0	0
D2092.10	WBGene00044610	D2092.10	-	-	-	0	0	0	0	0	0	0	0	0	0	0	0	0	0	0	0	0	0	0	0	0
maf-1	WBGene00077521	F45H11.6	0.069	0.064	0.36	0	0	0	0	0	0	0	0	0	1	0	0	0	0	0	1	1	0	0	0	0

## Sheet: TF expression in other tissues 
This table was acquired from the Ahringer laboratory C. elegans regulatory atlas (https://ahringerlab.com/RegAtlas/)
WormBaseID	Gene Public Name	Tissue expression	Germline	Neurons	Muscle	Hypod.	Intest.	1st.max.tissue	2nd.max.tissue	3rd.max.tissue	4th.max.tissue	5th.max.tissue
WBGene00018099	ztf-28	Germline	67.349	14.758	6.303	9.455	11.834	Germline	Neurons	Intest.	Hypod.	Muscle
WBGene00017538	ceh-49	Germline	32.074	1.746	7.433	4.15	2.564	Germline	Muscle	Hypod.	Intest.	Neurons
WBGene00011505	pzf-1	Germline	65.949	4.895	4.602	7.523	4.359	Germline	Hypod.	Neurons	Muscle	Intest.
WBGene00009834	lsy-27	Germline	55.929	4.02	1.794	5.401	4.614	Germline	Hypod.	Intest.	Neurons	Muscle
WBGene00012405	ztf-25	Germline	81.88	2.305	3.48	5.437	3.439	Germline	Hypod.	Muscle	Intest.	Neurons
WBGene00000460	ceh-39	Germline	140.738	12.016	12.997	13.494	11.309	Germline	Hypod.	Muscle	Neurons	Intest.
WBGene00011614	nfya-1	Germline	60.932	4.916	5.254	6.862	12.543	Germline	Intest.	Hypod.	Muscle	Neurons
WBGene00001435	fkh-3	Germline	23.509	2.076	0.263	3.12	1.674	Germline	Hypod.	Neurons	Intest.	Muscle
WBGene00012074	T27A8.2	Germline	33.529	1.332	2.572	2.229	1.279	Germline	Muscle	Hypod.	Neurons	Intest.
WBGene00009009	F21D5.4	Germline	84.289	9.415	14.164	10.564	17.499	Germline	Intest.	Muscle	Hypod.	Neurons
WBGene00012436	flh-3	Germline	41.89	6.073	3.758	6.942	4.484	Germline	Hypod.	Neurons	Intest.	Muscle
WBGene00011597	zim-1	Germline	35.163	7.798	4.033	6.118	6.615	Germline	Neurons	Intest.	Hypod.	Muscle
WBGene00011600	zim-2	Germline	55.883	14.456	9.496	10.076	13.805	Germline	Neurons	Intest.	Hypod.	Muscle
WBGene00001585	gfl-1	Germline	122.323	27.445	27.775	23.045	25.643	Germline	Muscle	Neurons	Intest.	Hypod.
WBGene00006555	tbx-36	Germline	36.076	2.93	1.93	5.944	4.012	Germline	Hypod.	Intest.	Neurons	Muscle
WBGene00007732	spe-44	Germline	67.243	15.627	8.514	9.968	10.309	Germline	Neurons	Intest.	Hypod.	Muscle
WBGene00003037	lin-54	Germline	135.831	30.987	21.737	28.293	30.786	Germline	Neurons	Intest.	Hypod.	Muscle
WBGene00013383	aptf-2	Germline	44.631	6.516	3.209	6.955	6.402	Germline	Hypod.	Neurons	Intest.	Muscle
WBGene00013799	athp-3	Germline	91.901	1.92	2.839	3.863	1.63	Germline	Hypod.	Muscle	Neurons	Intest.
WBGene00017742	nfyc-1	Germline	138.518	29.195	20.924	27.711	29.26	Germline	Intest.	Neurons	Hypod.	Muscle
WBGene00018446	ceh-83	Germline	79.492	4.377	5.115	11.685	9.21	Germline	Hypod.	Intest.	Muscle	Neurons
WBGene00004750	sea-1	Germline	67.284	3.992	4.656	8.951	4.702	Germline	Hypod.	Intest.	Muscle	Neurons
WBGene00016713	C46E10.9	Germline	31.174	1.571	0.69	0.934	0.687	Germline	Neurons	Hypod.	Muscle	Intest.
WBGene00009203	aptf-3	Germline	78.201	19.772	16.96	19.434	14.508	Germline	Neurons	Hypod.	Muscle	Intest.
WBGene00007242	madf-5	Germline	65.225	8.367	9.87	12.463	4.968	Germline	Hypod.	Muscle	Neurons	Intest.
WBGene00013150	Y53F4B.3	Germline	130.005	17.995	21.146	21.56	21.036	Germline	Hypod.	Muscle	Intest.	Neurons
WBGene00003601	nhr-2	Germline	26.708	1.129	1.664	5.24	2.303	Germline	Hypod.	Intest.	Muscle	Neurons
WBGene00008417	D2030.7	Germline	113.898	29.597	17.649	19.874	25.386	Germline	Neurons	Intest.	Hypod.	Muscle
WBGene00005011	F26F4.8	Germline	105.182	14.496	10.074	14.59	9.306	Germline	Hypod.	Neurons	Muscle	Intest.
WBGene00006546	tbx-9	Germline	39.279	1.772	2.367	4.147	3.362	Germline	Hypod.	Intest.	Muscle	Neurons
WBGene00013431	ceh-92	Germline	27.113	6.262	4.548	3.893	4.138	Germline	Neurons	Muscle	Intest.	Hypod.
WBGene00006552	tbx-33	Germline	9.772	0.983	0.518	1.406	0.695	Germline	Hypod.	Neurons	Intest.	Muscle
WBGene00000461	ceh-40	Germline_Hypod.	11.66	0.497	0.18	2.357	0.846	Germline	Hypod.	Intest.	Neurons	Muscle
WBGene00018355	ceh-86	Germline_Hypod.	10.597	0.471	0.614	3.133	0.352	Germline	Hypod.	Muscle	Neurons	Intest.
WBGene00008844	F15A4.10	Germline_Hypod.	57.236	1.341	2.654	8.02	1.704	Germline	Hypod.	Muscle	Intest.	Neurons
WBGene00003622	nhr-23	Germline_Hypod.	45.068	12.535	7.981	35.253	7.217	Germline	Hypod.	Neurons	Muscle	Intest.
WBGene00022805	nhr-256	Germline_Hypod._Intest.	17.587	4.621	5.786	15.338	23.66	Intest.	Germline	Hypod.	Muscle	Neurons
WBGene00003612	nhr-13	Germline_Hypod._Intest.	28.811	3.036	5.72	14.403	54.299	Intest.	Germline	Hypod.	Muscle	Neurons
WBGene00016364	nhr-161	Germline_Hypod._Intest.	14.772	2.147	2.889	12.061	11.438	Germline	Hypod.	Intest.	Muscle	Neurons
WBGene00005008	spr-3	Germline_Hypod._Intest.	39.537	9.983	8.787	32.167	29.803	Germline	Hypod.	Intest.	Neurons	Muscle
WBGene00044032	ceh-99	Germline_Intest.	24.366	1.383	1.11	1.549	41.149	Intest.	Germline	Hypod.	Neurons	Muscle
WBGene00016029	elf-1	Germline_Intest.	10.719	0.937	0.829	0.831	5.005	Germline	Intest.	Neurons	Hypod.	Muscle
WBGene00010771	K11D2.5	Germline_Muscle_Hypod._Intest.	11.378	2.286	7.732	5.336	6.471	Germline	Muscle	Intest.	Hypod.	Neurons
WBGene00009939	ztf-11	Germline_Neurons	11.125	12.646	0.809	1.451	1.129	Neurons	Germline	Hypod.	Intest.	Muscle
WBGene00001186	egl-18	Germline_Neurons_Hypod.	11.296	9.966	1.924	5.888	1.05	Germline	Neurons	Hypod.	Muscle	Intest.
WBGene00013584	nhr-243	Germline_Neurons_Hypod._Intest.	14.803	6.367	1.832	17.297	22.225	Intest.	Hypod.	Germline	Neurons	Muscle
WBGene00000995	die-1	Germline_Neurons_Muscle_Hypod.	18.6	10.012	11.904	9.145	2.629	Germline	Muscle	Neurons	Hypod.	Intest.
WBGene00003163	mdl-1	Hypod.	24.454	97.438	193.215	1253.34	175.587	Hypod.	Muscle	Intest.	Neurons	Germline
WBGene00004786	sex-1	Hypod.	21.57	4.222	25.253	83.982	5.45	Hypod.	Muscle	Germline	Intest.	Neurons
WBGene00003624	nhr-28	Hypod.	6.454	6.074	13.167	61.561	23.528	Hypod.	Intest.	Muscle	Germline	Neurons
WBGene00009133	bed-3	Hypod.	3.46	4.77	5.744	70.163	1.282	Hypod.	Muscle	Neurons	Germline	Intest.
WBGene00007058	dmd-6	Hypod.	11.337	21.63	47.619	355.22	86.334	Hypod.	Intest.	Muscle	Neurons	Germline
WBGene00003620	nhr-21	Hypod.	6.964	41.398	44.896	484.214	61.614	Hypod.	Intest.	Muscle	Neurons	Germline
WBGene00003044	lir-1	Hypod.	15.736	7.453	7.52	41.234	15.791	Hypod.	Intest.	Germline	Muscle	Neurons
WBGene00003651	nhr-61	Hypod.	2.038	2.805	2.953	13.624	3.083	Hypod.	Intest.	Muscle	Neurons	Germline
WBGene00003378	mml-1	Hypod.	31.955	57.588	98.237	634.8	154.828	Hypod.	Intest.	Muscle	Neurons	Germline
WBGene00003704	nhr-114	Hypod._Intest.	13.035	35.848	60.578	1365.7	542.336	Hypod.	Intest.	Muscle	Neurons	Germline
WBGene00003632	nhr-42	Hypod._Intest.	12.922	16.334	21.552	72.748	134.53	Intest.	Hypod.	Muscle	Neurons	Germline
WBGene00022861	dve-1	Hypod._Intest.	1.776	8.92	9.873	61.658	65.269	Intest.	Hypod.	Muscle	Neurons	Germline
WBGene00001441	fkh-9	Hypod._Intest.	4.498	16.855	20.132	57.537	127.456	Intest.	Hypod.	Muscle	Neurons	Germline
WBGene00003616	nhr-17	Hypod._Intest.	16.388	25.871	53.908	887.823	493.524	Hypod.	Intest.	Muscle	Neurons	Germline
WBGene00003626	nhr-32	Hypod._Intest.	5.767	7.231	12.222	39.373	76.232	Intest.	Hypod.	Muscle	Neurons	Germline
WBGene00003638	nhr-48	Hypod._Intest.	20.596	14.722	19.821	93.435	57.413	Hypod.	Intest.	Germline	Muscle	Neurons
WBGene00020930	hlh-30	Hypod._Intest.	13.117	19.812	27.222	139.022	122.496	Hypod.	Intest.	Muscle	Neurons	Germline
WBGene00003636	nhr-46	Hypod._Intest.	23.019	23.541	21.946	364.658	76.64	Hypod.	Intest.	Neurons	Germline	Muscle
WBGene00003627	nhr-34	Hypod._Intest.	5.188	12.187	29.938	150.346	280.444	Intest.	Hypod.	Muscle	Neurons	Germline
WBGene00003621	nhr-22	Hypod._Intest.	20.065	10.182	14.15	58.555	102.874	Intest.	Hypod.	Germline	Muscle	Neurons
WBGene00012988	ztf-22	Hypod._Intest.	7.874	8.654	25.752	372.351	94.582	Hypod.	Intest.	Muscle	Neurons	Germline
WBGene00018786	hmbx-1	Hypod._Intest.	15.664	9.405	4.358	33.064	56.39	Intest.	Hypod.	Germline	Neurons	Muscle
WBGene00003654	nhr-64	Hypod._Intest.	1.913	1.467	1.712	7.585	37.943	Intest.	Hypod.	Germline	Muscle	Neurons
WBGene00003639	nhr-49	Hypod._Intest.	62.444	62.059	56.306	136.855	211.181	Intest.	Hypod.	Germline	Neurons	Muscle
WBGene00000095	aha-1	Hypod._Intest.	29.94	27.247	23.643	156.925	71.131	Hypod.	Intest.	Germline	Neurons	Muscle
WBGene00000912	daf-16	Hypod._Intest.	25.196	24.541	33.465	130.103	228.56	Intest.	Hypod.	Muscle	Germline	Neurons
WBGene00012735	sptf-3	Hypod._Intest.	15.332	15.156	13.221	48.485	44.155	Hypod.	Intest.	Germline	Neurons	Muscle
WBGene00004857	sma-3	Hypod._Intest.	16.956	10.538	14.279	47.466	74.118	Intest.	Hypod.	Germline	Muscle	Neurons
WBGene00006986	zip-1	Hypod._Intest.	7.736	8.067	12.799	33.97	95.179	Intest.	Hypod.	Muscle	Neurons	Germline
WBGene00006796	unc-62	Intest.	17.607	18.312	22.258	17.084	105.539	Intest.	Muscle	Neurons	Germline	Hypod.
WBGene00015981	elt-7	Intest.	1.406	2.258	5.584	3.685	41.578	Intest.	Muscle	Hypod.	Neurons	Germline
WBGene00003628	nhr-35	Intest.	6.612	13.287	26.961	36.371	160.139	Intest.	Hypod.	Muscle	Neurons	Germline
WBGene00017687	ets-4	Intest.	10.336	26.986	30.67	27.739	1230.05	Intest.	Muscle	Hypod.	Neurons	Germline
WBGene00008999	myrf-2	Intest.	25.607	32.368	34.19	26.401	105.187	Intest.	Muscle	Neurons	Hypod.	Germline
WBGene00010553	K04C1.3	Intest.	8.099	7.561	5.163	3.577	29.4	Intest.	Germline	Neurons	Muscle	Hypod.
WBGene00003694	nhr-104	Intest.	9.433	2.72	7.283	6.516	26.059	Intest.	Germline	Muscle	Hypod.	Neurons
WBGene00003656	nhr-66	Intest.	30.856	17.393	15.539	28.476	94.402	Intest.	Germline	Hypod.	Neurons	Muscle
WBGene00009899	efl-3	Intest.	10.238	6.109	9.366	4.315	27.601	Intest.	Germline	Muscle	Neurons	Hypod.
WBGene00011924	T22C8.3	Intest.	4.204	4.459	5.353	3.18	22.075	Intest.	Muscle	Neurons	Germline	Hypod.
WBGene00018189	nhr-181	Low	1.663	0.329	0.371	4.714	0.208	Hypod.	Germline	Muscle	Neurons	Intest.
WBGene00001436	fkh-4	Low	4.707	0.771	0.263	0.541	0.92	Germline	Intest.	Neurons	Hypod.	Muscle
WBGene00001958	hlh-14	Low	2.617	0	0	0.938	0.417	Germline	Hypod.	Intest.	Neurons	Muscle
WBGene00019598	K09H9.7	Low	0	0	0	0	0	Germline	Neurons	Muscle	Hypod.	Intest.
WBGene00020111	R151.8	Low	0	0	0	0	0	Germline	Neurons	Muscle	Hypod.	Intest.
WBGene00007749	ceh-79	Muscle	2.805	8.772	65.98	8.603	14.116	Muscle	Intest.	Neurons	Hypod.	Germline
WBGene00006827	unc-98	Muscle	4.547	11.635	82.041	3.678	9.387	Muscle	Neurons	Intest.	Germline	Hypod.
WBGene00000453	ceh-32	Neurons	1.243	18.943	5.602	4.804	3.064	Neurons	Muscle	Hypod.	Intest.	Germline
WBGene00003000	lin-11	Neurons	0.88	12.458	2.615	3.119	1.333	Neurons	Hypod.	Muscle	Intest.	Germline
WBGene00011259	miz-1	Neurons_Hypod._Intest.	27.79	70.05	27.708	161.403	86.046	Hypod.	Intest.	Neurons	Germline	Muscle
WBGene00006445	tag-68	Neurons_Muscle	3.646	29.855	20.192	1.782	2.807	Neurons	Muscle	Germline	Intest.	Hypod.
WBGene00003024	lin-39	Neurons_Muscle_Hypod.	1.078	19.305	17.802	11.478	1.558	Neurons	Muscle	Hypod.	Intest.	Germline
WBGene00015966	C18C4.5	Soma	6.208	23.968	21.846	37.506	58.96	Intest.	Hypod.	Neurons	Muscle	Germline
WBGene00001345	fos-1	Soma	1.818	21.103	23.679	34.241	82.664	Intest.	Hypod.	Muscle	Neurons	Germline
WBGene00019521	dmd-7	Soma	10.138	46.917	37.797	68.35	71.317	Intest.	Hypod.	Neurons	Muscle	Germline
WBGene00006342	sup-37	Soma	7.832	48.245	65.261	61.362	107.315	Intest.	Muscle	Hypod.	Neurons	Germline
WBGene00010012	saeg-1	Soma	7.96	78.806	81.526	154.71	188.464	Intest.	Hypod.	Muscle	Neurons	Germline
WBGene00001851	hif-1	Soma	62.371	232.984	173.056	221.198	331.143	Intest.	Neurons	Hypod.	Muscle	Germline
WBGene00003630	nhr-40	Soma	2.698	42.659	22.5	74.311	36.392	Hypod.	Neurons	Intest.	Muscle	Germline
WBGene00000221	atf-5	Soma	18.611	64.599	100.822	99.537	123.246	Intest.	Muscle	Hypod.	Neurons	Germline
WBGene00016269	C30G4.4	Soma	0.869	4.131	33.816	109.403	66.497	Hypod.	Intest.	Muscle	Neurons	Germline
WBGene00003687	nhr-97	Soma	10.882	42.392	34.243	78.488	71.879	Hypod.	Intest.	Neurons	Muscle	Germline
WBGene00020251	camt-1	Soma	13.812	53.822	54.736	31.254	81.449	Intest.	Muscle	Neurons	Hypod.	Germline
WBGene00001208	egl-44	Soma	5.052	14.237	49.41	42.514	108.06	Intest.	Muscle	Hypod.	Neurons	Germline
WBGene00012005	2001-06-01	Soma	0.798	24.169	10.492	33.008	107.968	Intest.	Hypod.	Neurons	Muscle	Germline
WBGene00003618	nhr-19	Soma	7.134	29.001	87.115	167.813	132.321	Hypod.	Intest.	Muscle	Neurons	Germline
WBGene00013859	ZC247.1	Soma	10.047	58.382	104.063	120.83	71.215	Hypod.	Muscle	Intest.	Neurons	Germline
WBGene00006543	tbx-2	Soma	3.416	9.38	10.068	21.552	26.327	Intest.	Hypod.	Muscle	Neurons	Germline
WBGene00001955	hlh-11	Soma	21.293	46.002	84.39	80.262	137.516	Intest.	Muscle	Hypod.	Neurons	Germline
WBGene00008007	C38D4.7	Sperm	191.814	14.623	7.887	14.49	6.537	Germline	Neurons	Hypod.	Muscle	Intest.
WBGene00044689	arid-1	Ubiq.	46.727	23.675	13.086	22.198	27.315	Germline	Intest.	Neurons	Hypod.	Muscle
WBGene00018622	nhr-190	Ubiq.	22.064	8.735	9.774	12.129	29	Intest.	Germline	Hypod.	Muscle	Neurons
WBGene00020852	nhr-228	Ubiq.	27.566	6.62	11.303	14.658	13.222	Germline	Hypod.	Intest.	Muscle	Neurons
WBGene00018140	F37B4.10	Ubiq.	36.379	7.397	10.428	7.144	10.154	Germline	Muscle	Intest.	Neurons	Hypod.
WBGene00003025	lin-40	Ubiq.	99.344	41.034	30.506	44.08	52.511	Germline	Intest.	Hypod.	Neurons	Muscle
WBGene00017317	attf-2	Ubiq.	197.075	78.98	52.44	66.535	79.146	Germline	Intest.	Neurons	Hypod.	Muscle
WBGene00017605	F19F10.9	Ubiq.	91.499	46.9	31.42	29.535	52.818	Germline	Intest.	Neurons	Muscle	Hypod.
WBGene00005006	spr-1	Ubiq.	80.963	32.918	26.016	29.193	51.412	Germline	Intest.	Neurons	Hypod.	Muscle
WBGene00008236	C50F4.12	Ubiq.	53.084	17.258	19.476	20.34	35.905	Germline	Intest.	Hypod.	Muscle	Neurons
WBGene00013966	ztf-9	Ubiq.	34.186	17.105	16.419	10.888	11.723	Germline	Neurons	Muscle	Intest.	Hypod.
WBGene00009772	ztf-7	Ubiq.	357.171	426.193	427.956	456.285	558.303	Intest.	Hypod.	Muscle	Neurons	Germline
WBGene00007547	nhr-154	Ubiq.	23.277	13.996	20.439	14.004	31.785	Intest.	Germline	Muscle	Hypod.	Neurons
WBGene00012243	W04D2.4	Ubiq.	93.823	42.957	31.918	29.614	37.974	Germline	Neurons	Intest.	Muscle	Hypod.
WBGene00001874	him-17	Ubiq.	139.079	69.188	50.029	56.38	61.865	Germline	Neurons	Intest.	Hypod.	Muscle
WBGene00011696	eea-1	Ubiq.	50.437	25.362	18.212	25.762	30.747	Germline	Intest.	Hypod.	Neurons	Muscle
WBGene00009084	F23B12.7	Ubiq.	68.408	47.401	45.029	94.938	67.444	Hypod.	Germline	Intest.	Neurons	Muscle
WBGene00003674	nhr-84	Ubiq.	30.749	16.319	12.862	12.93	44.45	Intest.	Germline	Neurons	Hypod.	Muscle
WBGene00020214	attf-5	Ubiq.	17.307	11.865	14.213	12.851	30.958	Intest.	Germline	Muscle	Hypod.	Neurons
WBGene00003087	lsy-2	Ubiq.	30.638	22.613	16.397	22.396	34.481	Intest.	Germline	Neurons	Hypod.	Muscle
WBGene00018740	tra-4	Ubiq.	26.533	6.39	7.527	10.996	13.499	Germline	Intest.	Hypod.	Muscle	Neurons
WBGene00019611	K10B3.5	Ubiq.	55.456	12.855	18.934	18.591	23.823	Germline	Intest.	Muscle	Hypod.	Neurons
WBGene00003661	nhr-71	Ubiq.	46.882	32.318	22.254	22.342	79.562	Intest.	Germline	Neurons	Hypod.	Muscle
WBGene00023497	lin-15B	Ubiq.	65.411	21.509	20.493	22.462	29.237	Germline	Intest.	Hypod.	Neurons	Muscle
WBGene00020630	T20F7.1	Ubiq.	35.268	11.731	11.694	10.477	19.036	Germline	Intest.	Neurons	Muscle	Hypod.
WBGene00003600	nhr-1	Ubiq.	23.179	25.027	31.339	22.884	30.247	Muscle	Intest.	Neurons	Germline	Hypod.
WBGene00019824	R02D3.7	Ubiq.	128.608	37.281	35.848	28.108	47.343	Germline	Intest.	Neurons	Muscle	Hypod.
WBGene00001324	eor-1	Ubiq.	59.303	18.069	15.261	22.004	33.295	Germline	Intest.	Hypod.	Neurons	Muscle
WBGene00018317	F41H10.4	Ubiq.	125.209	36.156	41.426	30.678	45.102	Germline	Intest.	Muscle	Neurons	Hypod.
WBGene00002245	lag-1	Ubiq.	28.796	10.668	10.674	17.754	19.694	Germline	Intest.	Hypod.	Muscle	Neurons
WBGene00001029	dnj-11	Ubiq.	167.488	81.73	71.942	54.509	68.929	Germline	Neurons	Muscle	Intest.	Hypod.
WBGene00044508	nsy-7	Ubiq.	13.313	9.249	7.846	8.733	18.958	Intest.	Germline	Neurons	Hypod.	Muscle
WBGene00021538	rabs-5	Ubiq.	31.044	15.567	16.276	10.031	20.549	Germline	Intest.	Muscle	Neurons	Hypod.
WBGene00008363	D1046.2	Ubiq.	66.577	27.76	23.023	21.592	24.873	Germline	Neurons	Intest.	Muscle	Hypod.
WBGene00004319	rbr-2	Ubiq.	149.677	125.171	111.779	96.971	90.839	Germline	Neurons	Muscle	Hypod.	Intest.
WBGene00012385	Y5F2A.4	Ubiq.	57.107	23.722	16.858	25.802	37.001	Germline	Intest.	Hypod.	Neurons	Muscle
WBGene00007105	B0035.1	Ubiq.	205.899	76.776	60.79	55.878	60.268	Germline	Neurons	Muscle	Intest.	Hypod.
WBGene00003148	mbf-1	Ubiq.	197.414	70.202	90.707	59.126	73.166	Germline	Muscle	Intest.	Neurons	Hypod.
WBGene00003218	mep-1	Ubiq.	230.316	138.833	119.245	131.342	154.814	Germline	Intest.	Neurons	Hypod.	Muscle
WBGene00008683	repo-1	Ubiq.	148.316	56.465	59.61	65.362	64.839	Germline	Hypod.	Intest.	Muscle	Neurons
WBGene00022554	duxl-1	Ubiq.	72.869	14.445	14.462	27.137	25.229	Germline	Hypod.	Intest.	Muscle	Neurons
WBGene00019218	madf-3	Ubiq.	46.218	17.884	28.83	33.205	42.915	Germline	Intest.	Hypod.	Muscle	Neurons
WBGene00019217	athp-2	Ubiq.	61.591	27.351	26.905	34.085	42.926	Germline	Intest.	Hypod.	Neurons	Muscle
WBGene00022762	ZK546.5	Ubiq.	65.799	25.792	22.343	13.82	24.541	Germline	Neurons	Intest.	Muscle	Hypod.
WBGene00018959	F56D1.1	Ubiq.	108.569	37.279	35.815	32.795	51.624	Germline	Intest.	Neurons	Muscle	Hypod.
WBGene00000383	cdc-14	Ubiq.	114.612	74.129	156.425	147.345	87.56	Muscle	Hypod.	Germline	Intest.	Neurons
WBGene00000459	ceh-38	Ubiq.	108.227	55.212	49.269	64.825	101.673	Germline	Intest.	Hypod.	Neurons	Muscle
WBGene00016888	C52E12.1	Ubiq.	66.763	33.251	34.87	23.772	48.729	Germline	Intest.	Muscle	Neurons	Hypod.
WBGene00020320	T07F8.4	Ubiq.	55.982	18.089	15.261	14.511	17.548	Germline	Neurons	Intest.	Muscle	Hypod.
WBGene00017967	ada-2	Ubiq.	82.641	36.358	28.217	22.69	34.833	Germline	Neurons	Intest.	Muscle	Hypod.
WBGene00003592	nfi-1	Ubiq.	74.198	26.646	26.142	30.766	62.786	Germline	Intest.	Hypod.	Neurons	Muscle
WBGene00003045	lir-2	Ubiq.	30.312	9.426	10.193	7.303	9.911	Germline	Muscle	Intest.	Neurons	Hypod.
WBGene00011639	ztf-17	Ubiq.	71.276	52.892	66.013	41.292	88.051	Intest.	Germline	Muscle	Neurons	Hypod.
WBGene00007433	swsn-7	Ubiq.	215.512	109.052	63.161	77.692	102.805	Germline	Neurons	Intest.	Hypod.	Muscle
WBGene00009448	zfp-2	Ubiq.	89.182	24.71	25.959	50.844	61.003	Germline	Intest.	Hypod.	Muscle	Neurons
WBGene00004134	myrf-1	Ubiq.	27.458	36.165	29.589	24.948	22.226	Neurons	Muscle	Germline	Hypod.	Intest.
WBGene00000472	cey-1	Ubiq.	282.308	503.232	380.991	241.96	200.082	Neurons	Muscle	Germline	Hypod.	Intest.
WBGene00010264	F58G1.2	Ubiq.	41.442	20.589	15.151	18.113	32.348	Germline	Intest.	Neurons	Hypod.	Muscle
WBGene00013006	lin-38	Ubiq.	21.54	7.214	5.859	8.041	12.93	Germline	Intest.	Hypod.	Neurons	Muscle
WBGene00013096	mcd-1	Ubiq.	27.601	9.532	6.73	11.461	13.463	Germline	Intest.	Hypod.	Neurons	Muscle
WBGene00001971	hmg-1.1	Ubiq.	574.752	354.711	272.147	358.166	313.568	Germline	Hypod.	Neurons	Intest.	Muscle
WBGene00022278	rcor-1	Ubiq.	29.816	8.63	8.939	12.479	17.491	Germline	Intest.	Hypod.	Muscle	Neurons
WBGene00016905	ztf-3	Ubiq.	25.24	6.197	7.742	5.655	14.974	Germline	Intest.	Muscle	Neurons	Hypod.
WBGene00022268	Y73E7A.1	Ubiq.	10.887	8.624	6.455	5.645	7.428	Germline	Neurons	Intest.	Muscle	Hypod.
WBGene00004077	pop-1	Ubiq.	22.486	13.872	10.66	21.852	26.541	Intest.	Germline	Hypod.	Neurons	Muscle
WBGene00019011	F57C9.4	Ubiq.	48.27	15.424	14.442	15.328	35.146	Germline	Intest.	Neurons	Hypod.	Muscle
WBGene00015091	vep-1	Ubiq.	65.424	32.606	35.546	36.271	56.882	Germline	Intest.	Hypod.	Muscle	Neurons
WBGene00002717	let-526	Ubiq.	117.927	87.526	60.735	87.572	132.324	Intest.	Germline	Hypod.	Neurons	Muscle
WBGene00001973	hmg-3	Ubiq.	136.196	77.657	35.703	51.696	44.204	Germline	Neurons	Hypod.	Intest.	Muscle
WBGene00006492	let-391	Ubiq.	45.845	17.123	14.083	10.242	19.505	Germline	Intest.	Neurons	Muscle	Hypod.
WBGene00016154	C27A12.2	Ubiq.	35.591	16.771	15.501	13.238	28.459	Germline	Intest.	Neurons	Muscle	Hypod.
WBGene00016754	cebp-2	Ubiq.	76.52	19.945	31.076	13.274	22.779	Germline	Muscle	Intest.	Neurons	Hypod.
WBGene00004111	pqn-21	Ubiq.	27.263	14.422	16.044	12.038	35.342	Intest.	Germline	Muscle	Neurons	Hypod.
WBGene00007042	pbrm-1	Ubiq.	150.393	87.731	49.857	87.789	109.338	Germline	Intest.	Hypod.	Neurons	Muscle
WBGene00005009	spr-4	Ubiq.	64.762	54.011	39.777	39.718	55.155	Germline	Intest.	Neurons	Muscle	Hypod.
WBGene00003014	lin-28	Ubiq.	40.487	30.777	30.516	18.705	30.207	Germline	Neurons	Muscle	Intest.	Hypod.
WBGene00008386	cdc-5L	Ubiq.	110.896	61.002	44.208	45.017	52.279	Germline	Neurons	Intest.	Hypod.	Muscle
WBGene00006577	tlf-1	Ubiq.	59.716	23.983	32.324	24.711	39.167	Germline	Intest.	Muscle	Hypod.	Neurons
WBGene00003052	lmn-1	Ubiq.	285.604	219.018	212.514	141.624	150.593	Germline	Neurons	Muscle	Intest.	Hypod.
WBGene00001568	snpc-4	Ubiq.	113.364	56.17	32.718	43.86	61.755	Germline	Intest.	Neurons	Hypod.	Muscle
WBGene00009508	row-1	Ubiq.	85.491	37.473	31.046	36.114	47.633	Germline	Intest.	Neurons	Hypod.	Muscle
WBGene00013178	Y53H1A.2	Ubiq.	36.597	14.705	13.331	11.406	18.975	Germline	Intest.	Neurons	Muscle	Hypod.
WBGene00002004	hsf-1	Ubiq.	34.9	15.377	16.943	17.478	30.197	Germline	Intest.	Hypod.	Muscle	Neurons
WBGene00012474	attf-6	Ubiq.	18.65	7.294	5.441	9.588	14.229	Germline	Intest.	Hypod.	Neurons	Muscle
WBGene00001979	hmp-2	Ubiq.	137.381	52.031	47.449	71.388	75.712	Germline	Intest.	Hypod.	Neurons	Muscle
WBGene00009553	hinf-1	Ubiq.	122.008	36.865	31.778	42.979	46.928	Germline	Intest.	Hypod.	Neurons	Muscle
WBGene00020763	ztf-18	Ubiq.	44.862	17.008	13.158	9.585	26.034	Germline	Intest.	Neurons	Muscle	Hypod.
WBGene00001086	dpy-27	Ubiq.	72.702	54.678	54.122	74.638	126.053	Intest.	Hypod.	Germline	Neurons	Muscle
WBGene00006959	xbp-1	Ubiq.	374.044	738.368	698.287	416.673	643.356	Neurons	Muscle	Intest.	Hypod.	Germline
WBGene00003619	nhr-20	Ubiq.	60.879	23.67	23.559	45.174	71.499	Intest.	Germline	Hypod.	Neurons	Muscle
WBGene00011956	T23F11.4	Ubiq.	26.671	9.531	5.373	10.771	8.571	Germline	Hypod.	Neurons	Intest.	Muscle
WBGene00003210	mel-28	Ubiq.	231.996	97.928	63.232	77.878	94.046	Germline	Neurons	Intest.	Hypod.	Muscle
WBGene00016138	flh-2	Ubiq.	34.103	26.883	30.685	26.286	28.674	Germline	Muscle	Intest.	Neurons	Hypod.
WBGene00020093	R144.3	Ubiq.	94.675	26.124	25.226	29.942	64.434	Germline	Intest.	Hypod.	Neurons	Muscle
WBGene00019629	cid-1	Ubiq.	68.364	43.764	41.287	34.95	82.808	Intest.	Germline	Neurons	Muscle	Hypod.
WBGene00022598	ztf-8	Ubiq.	60.14	23.315	21.986	25.962	34.603	Germline	Intest.	Hypod.	Neurons	Muscle
WBGene00015468	madf-11	Ubiq.	171.226	62.138	46.465	69.068	126.53	Germline	Intest.	Hypod.	Neurons	Muscle
WBGene00001514	xnd-1	Ubiq.	88.496	32.889	23.199	38.691	25.714	Germline	Hypod.	Neurons	Intest.	Muscle
WBGene00015147	B0336.7	Ubiq.	50.598	18.594	18.128	21.193	34.702	Germline	Intest.	Hypod.	Neurons	Muscle
WBGene00015477	attf-4	Ubiq.	18.909	29.005	30.879	11.416	33.442	Intest.	Muscle	Neurons	Germline	Hypod.
WBGene00001972	hmg-1.2	Ubiq.	137.116	74.553	72.336	55.888	85.231	Germline	Intest.	Neurons	Muscle	Hypod.
WBGene00007048	nfx-1	Ubiq.	156.29	83.888	67.575	74.428	75.708	Germline	Neurons	Intest.	Hypod.	Muscle
WBGene00015809	znf-622	Ubiq.	198.735	161.563	142.075	124.294	150.387	Germline	Neurons	Intest.	Muscle	Hypod.
WBGene00002169	isw-1	Ubiq.	127.695	51.024	32.023	43.033	48.269	Germline	Neurons	Intest.	Hypod.	Muscle
WBGene00001974	hmg-4	Ubiq.	169.621	85.996	55.138	64.586	57.475	Germline	Neurons	Hypod.	Intest.	Muscle
WBGene00006542	tbp-1	Ubiq.	84.232	30.031	25.047	24.142	37.637	Germline	Intest.	Neurons	Muscle	Hypod.
WBGene00001470	baz-2	Ubiq.	28.667	56.473	47.475	16.701	18.649	Neurons	Muscle	Germline	Intest.	Hypod.
WBGene00003002	lin-13	Ubiq.	198.102	115.955	98.124	103.318	126.256	Germline	Intest.	Neurons	Hypod.	Muscle
WBGene00022794	snu-23	Ubiq.	129.508	49.527	51.609	35.139	54.427	Germline	Intest.	Muscle	Neurons	Hypod.
WBGene00003021	lin-36	Ubiq.	170.927	51.492	45.535	50.709	65.136	Germline	Intest.	Neurons	Hypod.	Muscle
WBGene00001565	gei-8	Ubiq.	41.18	28.424	30.003	65.309	44.9	Hypod.	Intest.	Germline	Muscle	Neurons
WBGene00018836	F54F2.9	Ubiq.	69.722	27.257	25.617	22.398	27.915	Germline	Intest.	Neurons	Muscle	Hypod.
WBGene00018420	F44E2.7	Ubiq.	72.037	29.468	33.847	21.746	57.218	Germline	Intest.	Muscle	Neurons	Hypod.
WBGene00000475	cey-4	Ubiq.	256.958	221.848	221.171	178.738	234.808	Germline	Intest.	Neurons	Muscle	Hypod.
WBGene00008081	athp-1	Ubiq.	27.654	10.34	8.58	11.33	13.003	Germline	Intest.	Hypod.	Neurons	Muscle
WBGene00013236	Y56A3A.18	Ubiq.	324.696	113.751	104.41	99.276	117.27	Germline	Intest.	Neurons	Muscle	Hypod.
WBGene00013734	Y111B2A.10	Ubiq.	90.492	49.478	54.384	113.805	109.979	Hypod.	Intest.	Germline	Muscle	Neurons
WBGene00001035	dnj-17	Ubiq.	34.977	12.648	13.189	11.912	14.097	Germline	Intest.	Muscle	Neurons	Hypod.
WBGene00003722	nhr-132	Ubiq.-Biased	6.414	6.617	18.276	33.102	33.221	Intest.	Hypod.	Muscle	Neurons	Germline
WBGene00003676	nhr-86	Ubiq.-Biased	30.552	8.465	9.002	13.728	30.305	Germline	Intest.	Hypod.	Muscle	Neurons
WBGene00015451	C04F5.9	Ubiq.-Biased	38.38	7.062	6.651	9.741	25.22	Germline	Intest.	Hypod.	Neurons	Muscle
WBGene00003637	nhr-47	Ubiq.-Biased	23.662	10.969	7.045	33.101	18.82	Hypod.	Germline	Intest.	Neurons	Muscle
WBGene00020942	W02D7.6	Ubiq.-Biased	87.799	21.821	32.583	19.545	34.78	Germline	Intest.	Muscle	Neurons	Hypod.
WBGene00009584	drap-1	Ubiq.-Biased	76.884	55.768	102.457	171.785	111.098	Hypod.	Intest.	Muscle	Germline	Neurons
WBGene00003611	nhr-12	Ubiq.-Biased	50.294	6.341	12.178	9.704	17.336	Germline	Intest.	Muscle	Hypod.	Neurons
WBGene00003509	mxl-1	Ubiq.-Biased	109.809	24.383	29.676	26.548	39.33	Germline	Intest.	Muscle	Hypod.	Neurons
WBGene00010868	somi-1	Ubiq.-Biased	16.423	31.017	58.542	88.53	10.367	Hypod.	Muscle	Neurons	Germline	Intest.
WBGene00013878	atfs-1	Ubiq.-Biased	54.591	69.219	75.752	180.195	58.277	Hypod.	Muscle	Neurons	Intest.	Germline
WBGene00003692	nhr-102	Ubiq.-Biased	11.041	7.759	11.738	15.701	33.623	Intest.	Hypod.	Muscle	Germline	Neurons
WBGene00003660	nhr-70	Ubiq.-Biased	10.743	6.439	11.592	43.956	33.849	Hypod.	Intest.	Muscle	Germline	Neurons
WBGene00012702	ztf-20	Ubiq.-Biased	27.213	5.48	5.507	8.113	10.185	Germline	Intest.	Hypod.	Muscle	Neurons
WBGene00004203	swsn-1	Ubiq.-Biased	49.276	18.721	11.569	19.449	27.148	Germline	Intest.	Hypod.	Neurons	Muscle
WBGene00000899	daf-3	Ubiq.-Biased	14.886	16.779	13.367	11.86	36.734	Intest.	Neurons	Germline	Muscle	Hypod.
WBGene00000444	ceh-21	Ubiq.-Biased	50.42	5.409	10.032	9.685	16.561	Germline	Intest.	Muscle	Hypod.	Neurons
WBGene00018704	ztf-13	Ubiq.-Biased	25.593	24.248	44.125	22.343	80.338	Intest.	Muscle	Germline	Neurons	Hypod.
WBGene00004862	sma-9	Ubiq.-Biased	41.307	67.981	80.236	184.367	225.017	Intest.	Hypod.	Muscle	Neurons	Germline
WBGene00000222	atf-6	Ubiq.-Biased	39.103	21.541	17.864	10.377	52.571	Intest.	Germline	Neurons	Muscle	Hypod.
WBGene00010704	K09A11.1	Ubiq.-Biased	45.28	9.207	5.821	14.18	10.755	Germline	Hypod.	Intest.	Neurons	Muscle
WBGene00007772	egrh-1	Ubiq.-Biased	32.503	34.717	48.861	13.563	76.084	Intest.	Muscle	Neurons	Germline	Hypod.
WBGene00004745	sdc-1	Ubiq.-Biased	57.332	10.404	7.623	9.314	15.577	Germline	Intest.	Neurons	Hypod.	Muscle
WBGene00003712	nhr-122	Ubiq.-Biased	15.533	6.032	9.636	18.843	24.874	Intest.	Hypod.	Germline	Muscle	Neurons
WBGene00021522	nhr-274	Ubiq.-Biased	22.087	22.87	22.501	47.888	61.267	Intest.	Hypod.	Neurons	Muscle	Germline
WBGene00044651	egrh-3	Ubiq.-Biased	13.39	5.991	5.627	16.797	21.859	Intest.	Hypod.	Germline	Neurons	Muscle
WBGene00022060	dmd-9	Ubiq.-Biased	62.694	26.642	11.281	9.442	10.564	Germline	Neurons	Muscle	Intest.	Hypod.
WBGene00001975	hmg-5	Ubiq.-Biased	76.337	24.039	17.03	18.576	24.354	Germline	Intest.	Neurons	Hypod.	Muscle
WBGene00015507	C06A6.2	Ubiq.-Biased	16.228	9.843	9.611	28.047	33.801	Intest.	Hypod.	Germline	Neurons	Muscle
WBGene00007223	C01F6.9	Ubiq.-Biased	306.154	64.603	101.943	68.459	91.654	Germline	Muscle	Intest.	Hypod.	Neurons
WBGene00012435	flh-1	Ubiq.-Biased	117.38	44.377	23.109	36.409	37.036	Germline	Neurons	Intest.	Hypod.	Muscle
WBGene00003728	nhr-138	Ubiq.-Biased	14.036	34.957	25.98	97.466	94.754	Hypod.	Intest.	Neurons	Muscle	Germline
WBGene00003690	nhr-100	Ubiq.-Biased	18.757	50.808	38.62	125.851	104.984	Hypod.	Intest.	Neurons	Muscle	Germline
WBGene00003603	nhr-4	Ubiq.-Biased	26.799	43.254	23.879	153.543	68.467	Hypod.	Intest.	Neurons	Germline	Muscle
WBGene00011601	zim-3	Ubiq.-Biased	63.608	17.841	11.201	12.892	14.608	Germline	Neurons	Intest.	Hypod.	Muscle
WBGene00001867	him-8	Ubiq.-Biased	59.997	17.018	14.494	10.408	15.634	Germline	Neurons	Intest.	Muscle	Hypod.
WBGene00013465	Y67H2A.10	Ubiq.-Biased	36.839	7.988	10.819	11.119	19.024	Germline	Intest.	Hypod.	Muscle	Neurons
WBGene00015285	gmeb-1	Ubiq.-Biased	26.152	31.264	61.326	61.882	33.386	Hypod.	Muscle	Intest.	Neurons	Germline
WBGene00021132	nfyb-1	Ubiq.-Biased	19.263	6.284	6.319	12.902	20.094	Intest.	Germline	Hypod.	Muscle	Neurons
WBGene00004751	sea-2	Ubiq.-Biased	43.758	29.641	10.694	56.648	39.305	Hypod.	Germline	Intest.	Neurons	Muscle
WBGene00001976	hmg-11	Ubiq.-Biased	204.986	50.996	33.602	39.339	22.582	Germline	Neurons	Hypod.	Muscle	Intest.
WBGene00016162	crh-2	Ubiq.-Biased	30.564	24.378	44.144	64.27	89.259	Intest.	Hypod.	Muscle	Germline	Neurons
WBGene00001194	egl-27	Ubiq.-Biased	44.68	39.959	42.903	49.589	116.493	Intest.	Hypod.	Germline	Muscle	Neurons
WBGene00003012	lin-26	Ubiq.-Biased	79.678	38.569	50.041	122.688	49.853	Hypod.	Germline	Muscle	Intest.	Neurons
WBGene00001061	dpl-1	Ubiq.-Biased	87.052	24.542	15.734	23.951	26.158	Germline	Intest.	Neurons	Hypod.	Muscle
WBGene00003231	mex-6	Ubiq.-Biased	348.739	94	74.164	120.784	80.408	Germline	Hypod.	Neurons	Intest.	Muscle
WBGene00009365	F33H1.4	Ubiq.-Biased	174.275	65.246	41.716	59.447	66.533	Germline	Intest.	Neurons	Hypod.	Muscle
WBGene00011661	ztf-27	Ubiq.-Biased	8.305	20.198	20.819	12.683	35.179	Intest.	Muscle	Neurons	Hypod.	Germline
WBGene00001977	hmg-12	Ubiq.-Biased	644.874	171.425	99.229	172.794	150.38	Germline	Hypod.	Neurons	Intest.	Muscle
WBGene00013270	Y57A10A.31	Ubiq.-Biased	48.459	17.629	10.656	16.2	14.777	Germline	Neurons	Hypod.	Intest.	Muscle
WBGene00012584	ceh-100	Ubiq.-Biased	11.566	5.446	5.884	9.283	20.119	Intest.	Germline	Hypod.	Muscle	Neurons
WBGene00001162	efl-2	Ubiq.-Biased	10.512	10.573	9.218	21.781	26.012	Intest.	Hypod.	Neurons	Germline	Muscle
WBGene00021689	Y48G8AL.10	Ubiq.-Biased	18.458	5.955	8.201	12.829	18.434	Germline	Intest.	Hypod.	Muscle	Neurons
WBGene00017733	ubxn-1	Ubiq.-Biased	183.843	36.087	36.138	52.171	42.442	Germline	Hypod.	Intest.	Muscle	Neurons
WBGene00021552	zip-4	Ubiq.-Biased	71.173	20.021	14.357	21.387	21.153	Germline	Hypod.	Intest.	Neurons	Muscle
WBGene00007053	chd-7	Ubiq.-Biased	60.082	133.316	65.093	126.787	154.199	Intest.	Neurons	Hypod.	Muscle	Germline
WBGene00000474	cey-3	Ubiq.-Biased	635.953	190.569	114.975	185.838	117.307	Germline	Neurons	Hypod.	Intest.	Muscle
WBGene00000473	cey-2	Ubiq.-Biased	769.991	292.601	185.298	320.167	187.888	Germline	Hypod.	Neurons	Intest.	Muscle
WBGene00002783	let-607	Ubiq.-Biased	41.64	57.273	86.48	99.469	143.397	Intest.	Hypod.	Muscle	Neurons	Germline
WBGene00020399	ztf-4	Ubiq.-Biased	59.407	17.998	11.808	13.859	32.541	Germline	Intest.	Neurons	Hypod.	Muscle
WBGene00011066	ztf-15	Ubiq.-Biased	56.452	18.647	11.862	14.312	14.88	Germline	Neurons	Intest.	Hypod.	Muscle
WBGene00000467	cep-1	Ubiq.-Biased	48.181	13.853	8.342	8.265	11.7	Germline	Neurons	Intest.	Muscle	Hypod.
WBGene00003659	nhr-69	Ubiq.-Biased	9.273	15.75	16.685	31.434	95.361	Intest.	Hypod.	Muscle	Neurons	Germline
WBGene00009937	lsl-1	Ubiq.-Biased	99.309	36.28	19.206	20.037	21.165	Germline	Neurons	Intest.	Hypod.	Muscle
WBGene00013128	dxbp-1	Ubiq.-Biased	25.273	7.827	5.667	7.058	10.204	Germline	Intest.	Neurons	Hypod.	Muscle
WBGene00010770	K11D2.4	Ubiq.-Biased	16.691	5.652	9.417	23.923	8.989	Hypod.	Germline	Muscle	Intest.	Neurons
WBGene00012209	hmg-20	Ubiq.-Biased	34.198	8.051	7.453	8.373	8.427	Germline	Intest.	Hypod.	Neurons	Muscle
WBGene00013676	ekl-4	Ubiq.-Biased	34.014	8.638	5.646	8.514	16.364	Germline	Intest.	Neurons	Hypod.	Muscle
WBGene00003510	mxl-2	Ubiq.-Biased	78.356	26.694	31.456	83.489	44.074	Hypod.	Germline	Intest.	Muscle	Neurons
WBGene00019327	zip-2	Ubiq.-Biased	179.381	340.327	238.089	1067.88	754.298	Hypod.	Intest.	Neurons	Muscle	Germline
WBGene00000464	ceh-44	Ubiq.-Biased	26.288	30.221	7.529	15.842	36.209	Intest.	Neurons	Germline	Hypod.	Muscle
WBGene00022182	swsn-3	Ubiq.-Biased	32.732	8.272	8.37	8.154	13.007	Germline	Intest.	Muscle	Neurons	Hypod.
WBGene00008118	madf-8	Ubiq.-Biased	46.246	8.447	7.76	13.772	9.725	Germline	Hypod.	Intest.	Neurons	Muscle
WBGene00011206	R10E4.11	Ubiq.-Biased	22.567	7.242	5.364	7.76	17.366	Germline	Intest.	Hypod.	Neurons	Muscle
WBGene00000223	atf-7	Ubiq.-Biased	63.662	71.69	75.069	105.942	203.082	Intest.	Hypod.	Muscle	Neurons	Germline
WBGene00003912	pal-1	Ubiq.-Biased	55.873	13.186	6.974	10.102	29.622	Germline	Intest.	Neurons	Hypod.	Muscle
WBGene00006943	wrm-1	Ubiq.-Biased	139.72	41.903	24.595	41.518	34.707	Germline	Neurons	Hypod.	Intest.	Muscle
WBGene00020823	T26A5.8	Ubiq.-Biased	164.417	36.994	30.343	35.005	44.201	Germline	Intest.	Neurons	Hypod.	Muscle
WBGene00000443	ceh-20	Ubiq.-Biased	153.767	32.637	26.471	47.276	19.977	Germline	Hypod.	Neurons	Muscle	Intest.
WBGene00003609	nhr-10	Ubiq.-Biased	30.084	22.078	31.265	73.548	73.344	Hypod.	Intest.	Muscle	Germline	Neurons
WBGene00015352	C02F5.12	Ubiq.-Biased	13.778	14.874	17.783	31.296	57.184	Intest.	Hypod.	Muscle	Neurons	Germline
WBGene00019878	R05D3.3	Ubiq.-Biased	39.233	8.606	6.931	7.174	20.366	Germline	Intest.	Neurons	Hypod.	Muscle
WBGene00011964	saeg-2	Ubiq.-Biased	93.148	14.568	21.628	23.88	33.478	Germline	Intest.	Hypod.	Muscle	Neurons
WBGene00006395	taf-11.3	Ubiq.-Biased	60.824	12.605	11.857	13.566	11.201	Germline	Hypod.	Neurons	Muscle	Intest.
WBGene00012976	sup-35	Ubiq.-Biased	49.067	5.872	14.646	8.684	15.12	Germline	Intest.	Muscle	Hypod.	Neurons
WBGene00006604	tra-1	Ubiq.-Biased	19.6	28.039	21.159	123.545	65.557	Hypod.	Intest.	Neurons	Muscle	Germline
WBGene00004735	sbp-1	Ubiq.-Biased	9.03	13.593	20.064	43.122	149.62	Intest.	Hypod.	Muscle	Neurons	Germline
WBGene00012943	bed-2	Ubiq.-Biased	18.792	7.989	7.461	22.629	29.559	Intest.	Hypod.	Germline	Neurons	Muscle
WBGene00000793	crh-1	Ubiq.-Biased	10.05	32.895	19.622	38.413	78.272	Intest.	Hypod.	Neurons	Muscle	Germline
WBGene00013580	Y79H2A.3	Ubiq.-Biased	33.708	13.226	17.462	32.568	46.81	Intest.	Germline	Hypod.	Muscle	Neurons
WBGene00001092	dro-1	Ubiq.-Biased	239.947	62.725	65.122	56.679	54.18	Germline	Muscle	Neurons	Hypod.	Intest.
WBGene00003614	nhr-15	Unclassified	11.719	2.494	1.883	3.537	3.417	Germline	Hypod.	Intest.	Neurons	Muscle
WBGene00018265	nhr-182	Unclassified	10.203	4.589	8.843	15.423	19.5	Intest.	Hypod.	Germline	Muscle	Neurons
WBGene00019651	K11D12.12	Unclassified	36.38	10.203	4.659	11.142	14.044	Germline	Intest.	Hypod.	Neurons	Muscle
WBGene00013876	ceh-74	Unclassified	25.058	2.728	5.148	2.065	6.086	Germline	Intest.	Muscle	Neurons	Hypod.
WBGene00001161	efl-1	Unclassified	19.677	3.869	2.672	3.136	6.312	Germline	Intest.	Neurons	Hypod.	Muscle
WBGene00013350	slr-2	Unclassified	16.478	3.036	3.595	5.354	19.157	Intest.	Germline	Hypod.	Muscle	Neurons
WBGene00003685	nhr-95	Unclassified	11.658	4.589	11.074	7.848	11.932	Intest.	Germline	Muscle	Hypod.	Neurons
WBGene00012674	bed-1	Unclassified	12.27	5.665	4.146	11.041	6.657	Germline	Hypod.	Intest.	Neurons	Muscle
WBGene00019864	ceh-93	Unclassified	18.27	4.309	7.306	4.547	14.262	Germline	Intest.	Muscle	Hypod.	Neurons
WBGene00001981	hnd-1	Unclassified	12.536	0.295	1.097	0.739	0.365	Germline	Muscle	Hypod.	Intest.	Neurons
WBGene00015497	nhr-76	Unclassified	3.91	5.165	10.321	22.823	29.498	Intest.	Hypod.	Muscle	Neurons	Germline
WBGene00021942	madf-1	Unclassified	8.256	4.668	4.131	3.081	2.746	Germline	Neurons	Muscle	Hypod.	Intest.
WBGene00043705	egrh-2	Unclassified	8.451	1.899	3.342	2.485	3.679	Germline	Intest.	Muscle	Hypod.	Neurons
WBGene00045255	nhr-146	Unclassified	8.152	3.593	13.66	17.251	16.968	Hypod.	Intest.	Muscle	Germline	Neurons
WBGene00001253	elt-6	Unclassified	5.871	9.803	1.468	2.937	1.099	Neurons	Germline	Hypod.	Muscle	Intest.
WBGene00021082	zip-11	Unclassified	16.004	5.919	4.962	18.663	8.044	Hypod.	Germline	Intest.	Neurons	Muscle
WBGene00021374	Y37E11B.1	Unclassified	19.463	3.964	10.562	11.082	19.058	Germline	Intest.	Hypod.	Muscle	Neurons
WBGene00022681	ZK185.1	Unclassified	22.886	3.711	3.585	3.747	10.701	Germline	Intest.	Hypod.	Neurons	Muscle
WBGene00045078	C46C2.7	Unclassified	9.809	2.179	3.077	2.695	1.864	Germline	Muscle	Hypod.	Neurons	Intest.
WBGene00001249	elt-1	Unclassified	5.728	10.226	2.219	5.467	1.794	Neurons	Germline	Hypod.	Muscle	Intest.
WBGene00001820	ham-1	Unclassified	8.264	5.935	1.25	2.086	1.54	Germline	Neurons	Hypod.	Intest.	Muscle
WBGene00018433	ceh-82	Unclassified	10.872	0.262	0.138	2.196	0.614	Germline	Hypod.	Intest.	Neurons	Muscle
WBGene00016890	lst-5	Unclassified	19.834	9.888	9.537	3.819	3.741	Germline	Neurons	Muscle	Hypod.	Intest.
WBGene00017352	F10E7.11	Unclassified	19.818	6.735	4.6	5.23	7.326	Germline	Intest.	Neurons	Hypod.	Muscle
WBGene00000914	daf-19	Unclassified	13.364	10.355	6.683	3.71	22.727	Intest.	Germline	Neurons	Muscle	Hypod.
WBGene00004334	ref-1	Unclassified	15.754	4.451	4.457	10.274	1.508	Germline	Hypod.	Muscle	Neurons	Intest.
WBGene00003046	lir-3	Unclassified	20.31	4.592	2.893	2.375	5.173	Germline	Intest.	Neurons	Muscle	Hypod.
WBGene00012994	Y48C3A.12	Unclassified	10.263	4.29	3.258	8.347	11.32	Intest.	Germline	Hypod.	Neurons	Muscle
WBGene00022518	zfh-2	Unclassified	8.792	13.947	5.19	1.98	10.58	Neurons	Intest.	Germline	Muscle	Hypod.
WBGene00016930	madf-6	Unclassified	23.641	5.277	2.976	6.583	3.327	Germline	Hypod.	Neurons	Intest.	Muscle
WBGene00021846	ztf-23	Unclassified	11.212	2.138	2.944	2.504	6.726	Germline	Intest.	Muscle	Hypod.	Neurons
WBGene00001949	hlh-2	Unclassified	20.228	3.763	6.897	4.203	3.131	Germline	Muscle	Hypod.	Neurons	Intest.
WBGene00009923	F52B5.7	Unclassified	14.826	4.21	4.421	2.846	5.458	Germline	Intest.	Muscle	Neurons	Hypod.
WBGene00021387	Y37F4.6	Unclassified	25.133	5.185	11.294	3.827	20.285	Germline	Intest.	Muscle	Neurons	Hypod.
WBGene00043056	nfya-2	Unclassified	8.092	3.725	3.254	7.846	11.176	Intest.	Germline	Hypod.	Neurons	Muscle
WBGene00009461	madf-2	Unclassified	8.76	2.904	3.305	1.96	4.364	Germline	Intest.	Muscle	Neurons	Hypod.
WBGene00006547	tbx-11	Unclassified	4.49	1.674	2.76	5.086	1.093	Hypod.	Germline	Muscle	Neurons	Intest.
WBGene00018833	ztf-1	Unclassified	31.051	8.989	4.708	6.397	6.416	Germline	Neurons	Intest.	Hypod.	Muscle
WBGene00013425	ceh-91	Unclassified	17.386	5.404	3.83	6.183	7.486	Germline	Intest.	Hypod.	Neurons	Muscle
WBGene00013240	Y56A3A.28	Unclassified	8.357	3.516	3.32	3.799	9.332	Intest.	Germline	Hypod.	Neurons	Muscle

## Sheet: Known reproduction phenotypes
150 GTFs have reported roles in fertility, sterility, and brood size The results were obtained by submitting a list of 364 GTFs to the simplemine online tool of wormbase. (https://wormbase.org//tools/mine/simplemine.cgi)
WormBase Gene ID	Public Name	Sequence Name	Phenotype in RNAi	Phenotype in Mutant
WBGene00000223	atf-7	C07G2.2		sterile
WBGene00000383	cdc-14	C17G10.4	reduced brood size
WBGene00000444	ceh-21	T26C11.6		sterile
WBGene00000453	ceh-32	W05E10.3	reduced brood size	sterile
WBGene00000459	ceh-38	F22D3.1		sterile
WBGene00000912	daf-16	R13H8.1		sleep deprivation-induced brood size reduction enhanced
WBGene00000995	die-1	C18D1.1		sterile
WBGene00001029	dnj-11	F38A5.13		reduced brood size
WBGene00001035	dnj-17	T03F6.2	maternal sterile
WBGene00001061	dpl-1	T23G7.1	sterile, sterile progeny
WBGene00001086	dpy-27	R13G10.1	maternal sterile
WBGene00001092	dro-1	F53A2.5		sterile
WBGene00001161	efl-1	Y102A5C.18	sterile
WBGene00001186	egl-18	F55A8.1	reduced brood size, sterile
WBGene00001194	egl-27	C04A2.3	reduced brood size, sterile
WBGene00001208	egl-44	F28B12.2		reduced brood size, sterile
WBGene00001249	elt-1	W09C2.1	reduced brood size, unfertilized oocytes laid, sterile
WBGene00001253	elt-6	F52C12.5	reduced brood size
WBGene00001345	fos-1	F29G9.4	maternal sterile, sterile, sterile progeny	sterile
WBGene00001514	xnd-1	C05D2.5	maternal sterile, sterile, sterile progeny, sterile progeny	reduced brood size, sterile progeny
WBGene00001568	snpc-4	F32H2.1	reduced brood size, sterile	sterile
WBGene00001585	gfl-1	M04B2.3		sterile
WBGene00001867	him-8	T07G12.12		male fertility reduced, sterile
WBGene00001949	hlh-2	M05B5.5	sterile, sterile progeny	sterile
WBGene00001958	hlh-14	C18A3.8		sterile
WBGene00001972	hmg-1.2	F47D12.4	reduced brood size, male sterile, sterile, sterile progeny	reduced brood size, male sterile
WBGene00001973	hmg-3	C32F10.5	maternal sterile, sterile, sterile F1, sterile progeny	sterile
WBGene00001974	hmg-4	T20B12.8	reduced brood size, maternal sterile	sterile
WBGene00001975	hmg-5	F45E4.9	sterile progeny	sterile
WBGene00001977	hmg-12	Y17G7A.1		sterile
WBGene00001979	hmp-2	K05C4.6		sterile
WBGene00001981	hnd-1	C44C10.8	reduced brood size, sterile
WBGene00002004	hsf-1	Y53C10A.12	fertility reduced, sterile, sterile progeny
WBGene00002169	isw-1	F37A4.8	reduced brood size, sterile, sterile F1	sterile progeny
WBGene00002245	lag-1	K08B4.1	reduced brood size, sterile	sterile
WBGene00002717	let-526	C01G8.9	reduced brood size, maternal sterile, sterile	sterile
WBGene00002783	let-607	F57B10.1	reduced brood size, sterile	sterile
WBGene00003000	lin-11	ZC247.3	reduced brood size
WBGene00003002	lin-13	C03B8.4	sterile, sterile F1	sterile
WBGene00003012	lin-26	F18A1.2		sterile
WBGene00003014	lin-28	F02E9.2		sterile
WBGene00003025	lin-40	T27C4.4	reduced brood size, sterile, sterile progeny	sterile
WBGene00003037	lin-54	JC8.6		sterile
WBGene00003052	lmn-1	DY3.2	reduced brood size, maternal sterile, sterile, sterile progeny	sterile
WBGene00003087	lsy-2	F49H12.1	reduced brood size, sterile, sterile progeny	sterile
WBGene00003210	mel-28	C38D4.3	sterile	sterile
WBGene00003218	mep-1	M04B2.1	reduced brood size, maternal sterile, sterile, sterile progeny	sterile
WBGene00003378	mml-1	T20B12.6	reduced brood size
WBGene00003621	nhr-22	K06A1.4		sterile
WBGene00003622	nhr-23	C01H6.5	maternal sterile	sterile
WBGene00003639	nhr-49	K10C3.6	sterile
WBGene00003651	nhr-61	W01D2.2	reduced brood size
WBGene00003654	nhr-64	C45E1.1	reduced brood size
WBGene00003656	nhr-66	T09A12.4		sterile
WBGene00003676	nhr-86	Y40B10A.8	reduced brood size
WBGene00003687	nhr-97	H27C11.1		sterile
WBGene00003704	nhr-114	Y45G5AM.1	sterile F1, sterile progeny	sterile progeny
WBGene00003912	pal-1	C38D4.6	maternal sterile
WBGene00004077	pop-1	W10C8.2	maternal sterile
WBGene00004203	swsn-1	Y113G7B.23	reduced brood size, maternal sterile, sterile	sterile
WBGene00004735	sbp-1	Y47D3B.7	reduced brood size, fertility reduced, sterile, sterile progeny	sterile
WBGene00004786	sex-1	F44A6.2	reduced brood size, sterile
WBGene00004857	sma-3	R13F6.9		sterile
WBGene00005008	spr-3	C07A12.5	maternal sterile, sterile progeny
WBGene00006342	sup-37	C01B7.1		sterile
WBGene00006492	let-391	C27A12.3		sterile
WBGene00006542	tbp-1	T20B12.2	reduced brood size
WBGene00006543	tbx-2	F21H11.3		sterile
WBGene00006546	tbx-9	T07C4.6	reduced brood size
WBGene00006552	tbx-33	Y66A7A.8	maternal sterile, sterile	sterile
WBGene00006577	tlf-1	F39H11.2		sterile
WBGene00006604	tra-1	Y47D3A.6	sterile, sterile progeny
WBGene00006796	unc-62	T28F12.2	reduced brood size	sterile
WBGene00006943	wrm-1	B0336.1	sterile	fertility phenotype, sterile
WBGene00007042	pbrm-1	C26C6.1	reduced brood size, sterile
WBGene00007053	chd-7	T04D1.4		sterile
WBGene00007223	znf-706	C01F6.9		sterile
WBGene00007433	swsn-7	C08B11.3		sterile
WBGene00008081	athp-1	C44B9.4	maternal sterile
WBGene00008236	C50F4.12	C50F4.12		sterile
WBGene00008363	D1046.2	D1046.2		sterile
WBGene00008386	cdc-5L	D1081.8	maternal sterile, sterile	sterile
WBGene00008683	repo-1	F11A10.2	sterile
WBGene00009084	F23B12.7	F23B12.7	reduced brood size, maternal sterile, sterile progeny	sterile
WBGene00009365	F33H1.4	F33H1.4	sterile	sterile
WBGene00009448	zfp-2	F35H8.3	reduced brood size, sterile
WBGene00009553	hinf-1	F39B2.1	reduced brood size, sterile
WBGene00009937	lsl-1	F52F12.4		sterile
WBGene00009939	ztf-11	F52F12.6		sterile
WBGene00010264	F58G1.2	F58G1.2	sterile F1
WBGene00010771	mter-4	K11D2.5		sterile
WBGene00011601	zim-3	T07G12.11		sterile
WBGene00011639	ztf-17	T09A5.12		sterile
WBGene00011964	saeg-2	T23G5.6		sterile
WBGene00012005	2001-06-01	T24H10.7	reduced brood size, sterile
WBGene00012209	hmg-20	W02D9.3	sterile
WBGene00012243	W04D2.4	W04D2.4	sterile progeny	sterile
WBGene00012385	Y5F2A.4	Y5F2A.4		sterile
WBGene00012674	bed-1	Y39B6A.12	maternal sterile
WBGene00012735	sptf-3	Y40B1A.4	reduced brood size, maternal sterile, sterile progeny	reduced brood size, sterile
WBGene00012976	sup-35	Y48A6C.3	reduced brood size, sterile, sterile progeny
WBGene00013006	lin-38	Y48E1B.7	sterile F1	fertility reduced, lethal, sterile
WBGene00013096	mcd-1	Y51H1A.6	reduced brood size, sterile
WBGene00013128	dxbp-1	Y52B11A.9	reduced brood size, sterile, sterile progeny
WBGene00013236	znf-593	Y56A3A.18	sterile progeny	sterile
WBGene00013270	Y57A10A.31	Y57A10A.31		sterile
WBGene00013350	slr-2	Y59A8B.13		sterile
WBGene00013425	ceh-91	Y66A7A.5	maternal sterile
WBGene00013580	Y79H2A.3	Y79H2A.3		sterile
WBGene00013676	ekl-4	Y105E8A.17	maternal sterile, sterile, sterile progeny	sterile
WBGene00013734	Y111B2A.10	Y111B2A.10		sterile
WBGene00013859	ZC247.1	ZC247.1	maternal sterile	sterile progeny
WBGene00013878	atfs-1	ZC376.7		reduced brood size
WBGene00015091	B0261.1	B0261.1	maternal sterile	sterile progeny
WBGene00015147	B0336.7	B0336.7		sterile
WBGene00015352	C02F5.12	C02F5.12	sterile
WBGene00015468	madf-11	C05D2.6	reduced brood size, maternal sterile
WBGene00015809	znf-622	C16A3.4	sterile progeny	sterile
WBGene00016138	flh-2	C26E6.2	sterile progeny
WBGene00016154	szy-5	C27A12.2		sterile
WBGene00016754	cebp-2	C48E7.11		sterile
WBGene00017317	attf-2	F09G2.9	maternal sterile
WBGene00017605	snu-66	F19F10.9	sterile
WBGene00017687	ets-4	F22A3.1		sterile
WBGene00017742	nfyc-1	F23F1.1	sterile progeny
WBGene00017967	ada-2	F32A5.1	reduced brood size, sterile, sterile progeny
WBGene00018355	ceh-86	F42G2.6	reduced brood size, sterile
WBGene00018420	F44E2.7	F44E2.7		sterile
WBGene00018704	ztf-13	F52E4.8		sterile
WBGene00018959	F56D1.1	F56D1.1	sterile progeny	sterile
WBGene00019218	madf-3	H20J04.3		sterile
WBGene00019327	zip-2	K02F3.4	reduced brood size
WBGene00019629	cid-1	K10D2.3	sterile progeny	sterile
WBGene00020111	R151.8	R151.8	sterile
WBGene00020320	T07F8.4	T07F8.4	reduced brood size, sterile
WBGene00020399	ztf-4	T10B11.3		sterile
WBGene00020823	T26A5.8	T26A5.8	sterile
WBGene00020930	hlh-30	W02C12.3	reduced brood size, sterile
WBGene00020942	W02D7.6	W02D7.6		sterile
WBGene00021538	rabs-5	Y42H9AR.3		sterile
WBGene00021689	znf-236	Y48G8AL.10		sterile
WBGene00021846	ztf-23	Y54E10BR.8		sterile
WBGene00022182	swsn-3	Y71H2AM.17	sterile, sterile progeny
WBGene00022518	zfh-2	ZC123.3	maternal sterile, sterile, sterile progeny	sterile
WBGene00022598	ztf-8	ZC395.8	sterile progeny	reduced brood size
WBGene00022762	ZK546.5	ZK546.5		sterile
WBGene00022794	snu-23	ZK686.4		sterile
WBGene00022861	dve-1	ZK1193.5	sterile	sterile
WBGene00023497	lin-15B	ZK662.4		sterile
WBGene00044508	nsy-7	C18F3.4		sterile
