# Supplementary material for: A Transcription Factor Functional Atlas of Germline Development
Source: Research Square preprint supplement (doi:10.21203/rs.3.rs-3880498/v1), 2024-01-26
Supplement: Supplementary file 6 [file 4fac29404875a2e6498d21a8.xlsx]

## Sheet: Index
	Distal germline	TFs that regulate distal germline development in C. elegans. Mammalian (mouse, rat, human) orthologs associated with reproduction are shown.
	Proximal germline	TFs that regulate proximal germline development in C. elegans. Mammalian (mouse, rat, human) orthologs associated with reproduction are shown.
	Mammalian orthologs	TFs that regulate both distal and proximal germline in C. elegans with mammalian orthologs in mouse, rat and human shown. For each species, high and moderate ranks by DIOPT Ortholog Finder (Hu et al., 2011) were selected.
	GO - reproduction in mouse	Mouse orthologs of TFs regulating germline development in C. elegans that are associated with reproduction (GO:0000003). The list of mouse genes involved in reproduction were obtained using http://amigo.geneontology.org/, and then C. elegans orthologs for these identified and compared against TFs from our germline screen.
	GO - reproduction in rat	Rat orthologs of TFs regulating germline development in C. elegans that are associated with reproduction (GO:0000003). The list of mouse genes involved in reproduction were obtained using http://amigo.geneontology.org/, and then C. elegans orthologs for these identified and compared against TFs from our germline screen.
	GO - reproduction in human	Human orthologs of TFs regulating germline development in C. elegans that are associated with reproduction (GO:0000003). The list of mouse genes involved in reproduction were obtained using http://amigo.geneontology.org/, and then C. elegans orthologs for these identified and compared against TFs from our germline screen.

## Sheet: Distal germline
Mammalian orthologs of C. elegans distal germline regulatory TFs with reproduction GO
WormBase Gene ID	Gene.Public.Name	TF family	Mouse	Rat	Human
WBGene00001514	xnd-1	Others
WBGene00017317	F09G2.9	Others
WBGene00007732	spe-44	Others
WBGene00001979	hmp-2	Others	Ctnnb1	Ctnnb1	CTNNB1
WBGene00006943	wrm-1	Others
WBGene00003509	mxl-1	Others		Myc
WBGene00003510	mxl-2	Others
WBGene00013878	atfs-1	bZIP
WBGene00018317	F41H10.4	bZIP
WBGene00019327	zip-2	bZIP
WBGene00002783	let-607	bZIP	Creb3l4	Creb3l4	CREB3L4
WBGene00009084	F23B12.7	Others
WBGene00000443	ceh-20	HD	Pbx1		PBX1
WBGene00000461	ceh-40	HD			PBX1
WBGene00003912	pal-1	HD
WBGene00003000	lin-11	HD	Lhx1	Lhx1	LHX1
WBGene00001973	hmg-3	HMG
WBGene00004077	pop-1	HMG	Tcf7l2	Tcf7
WBGene00012209	W02D9.3	HMG
WBGene00022182	Y71H2AM.17	HMG		Smarce1
WBGene00001975	hmg-5	HMG
WBGene00003148	mbf-1	Others
WBGene00001470	baz-2	Others	Cecr2	Cecr2
WBGene00000899	daf-3	Others	Smad4	Smad4	SMAD4
WBGene00003592	nfi-1	Others
WBGene00006445	tag-68	Others
WBGene00001029	dnj-11	MYB
WBGene00015091	B0261.1	MYB
WBGene00020111	R151.8	MYB
WBGene00001565	gei-8	MYB		Ncor2	NCOR2
WBGene00008386	cdc-5L	MYB
WBGene00018836	F54F2.9	MYB
WBGene00001568	snpc-4	MYB	Mybl1		MYBL1
WBGene00008999	F21A10.2	Others
WBGene00006543	tbx-2	T-box	Tbx3	Tbx3	TBX3
WBGene00006547	tbx-11	T-box	Eomes		EOMES
WBGene00006552	tbx-33	T-box	Eomes	Tbxt	EOMES
WBGene00006542	tbp-1	Others		Tbp
WBGene00001208	egl-44	Others	Tead4	Tead4	TEAD3
WBGene00016269	C30G4.4	Others
WBGene00000914	daf-19	WH	Rfx2	Rfx2	RFX2
WBGene00001162	efl-2	WH		E2f1	E2F1
WBGene00002004	hsf-1	WH	Hsf1	Hsf1	HSF2
WBGene00016029	elf-1	WH
WBGene00009133	bed-3	Others
WBGene00001867	him-8	ZF
WBGene00003046	lir-3	ZF
WBGene00004111	pqn-21	ZF
WBGene00007223	C01F6.9	ZF
WBGene00008007	C38D4.7	ZF
WBGene00008363	D1046.2	ZF
WBGene00008683	repo-1	ZF
WBGene00011600	zim-2	ZF
WBGene00011661	ztf-27	ZF
WBGene00011924	T22C8.3	ZF
WBGene00013236	ZNF-593	ZF
WBGene00013270	Y57A10A.31	ZF
WBGene00015352	C02F5.12	ZF
WBGene00018140	F37B4.10	ZF
WBGene00019651	K11D12.12	ZF
WBGene00019824	R02D3.7	ZF
WBGene00019878	R05D3.3	ZF
WBGene00021387	Y37F4.6	ZF
WBGene00022681	ZK185.1	ZF
WBGene00009365	F33H1.4	ZF
WBGene00007105	B0035.1	ZF
WBGene00011206	R10E4.11	ZF
WBGene00011639	ztf-17	ZF	Zfp42		ZFP42
WBGene00019598	K09H9.7	ZF
WBGene00019611	K10B3.5	ZF
WBGene00006827	unc-98	ZF
WBGene00013465	Y67H2A.10	ZF
WBGene00015809	C16A3.4	ZF
WBGene00021374	Y37E11B.1	ZF
WBGene00022762	ZK546.5	ZF
WBGene00009508	row-1	ZF
WBGene00009937	lsl-1	ZF
WBGene00005011	F26F4.8	ZF
WBGene00010264	F58G1.2	ZF
WBGene00021846	ztf-23	ZF
WBGene00001324	eor-1	ZF
WBGene00009553	F39B2.1	ZF
WBGene00003231	mex-6	ZF
WBGene00001186	egl-18	ZF	Gata4	Gata1	GATA4
WBGene00015981	elt-7	ZF	Gata4	Gata1	GATA1
WBGene00003614	nhr-15	NHR
WBGene00003621	nhr-22	NHR
WBGene00003628	nhr-35	NHR	Hnf4a		HNF4A
WBGene00003630	nhr-40	NHR	Hnf4a	Hnf4a	HNF4A
WBGene00003638	nhr-48	NHR	Vdr	Vdr	VDR
WBGene00003639	nhr-49	NHR			HNF4A
WBGene00003659	nhr-69	NHR	Hnf4a	Hnf4a	HNF4A
WBGene00003674	nhr-84	NHR
WBGene00003687	nhr-97	NHR
WBGene00018265	nhr-182	NHR			PPARD
WBGene00045255	nhr-146	NHR

## Sheet: Proximal germline
Mammalian orthologs of C. elegans proximal germline regulatory TFs with reproduction GO
WormBase Gene ID	Gene.Public.Name	Family	Mouse	Rat	Human
WBGene00000459	ceh-38	HD
WBGene00000461	ceh-40	HD			PBX1
WBGene00001061	dpl-1	WH
WBGene00001435	fkh-3	WH
WBGene00001874	him-17	Others
WBGene00001971	hmg-1.1	HMG	Hmgb2		HMGB2
WBGene00001973	hmg-3	HMG
WBGene00002169	isw-1	AT-hook
WBGene00002717	let-526	Others	Arid1a	Arid1a
WBGene00003012	lin-26	ZF-C2H2
WBGene00003024	lin-39	HD
WBGene00003037	lin-54	Others	Tesmin	Tesmin	TESMIN
WBGene00003600	nhr-1	ZF-NHR		Hnf4a	HNF4A
WBGene00003624	nhr-28	ZF-NHR			PPARD
WBGene00003630	nhr-40	ZF-NHR	Hnf4a	Hnf4a	HNF4A
WBGene00003704	nhr-114	ZF-NHR		Hnf4a	HNF4A
WBGene00004203	swsn-1	MYB		Smarcc1
WBGene00004862	sma-9	ZF-C2H2
WBGene00006827	unc-98	ZF-C2H2
WBGene00006943	wrm-1	Others
WBGene00007242	madf-5	MADF
WBGene00008118	C46F11.3	MADF
WBGene00008999	F21A10.2	Others
WBGene00009009	F21D5.4	Others
WBGene00009461	F36D1.1	MADF
WBGene00009772	ztf-7	ZF-C2H2
WBGene00009923	F52B5.7	ZF-C2H2
WBGene00009937	lsl-1	ZF-C2H2
WBGene00011066	ztf-15	ZF-C2H2
WBGene00011639	ztf-17	ZF-C2H2	Zfp42		ZFP42
WBGene00012005	jun-1	bZIP	Junb	Junb	JUNB
WBGene00013150	Y53F4B.3	Others
WBGene00013350	slr-2	ZF-C2H2
WBGene00013425	Y66A7A.5	HD
WBGene00013734	Y111B2A.10	ZF-C2H2
WBGene00013966	ztf-9	ZF-C2H2
WBGene00015352	C02F5.12	ZF-C2H2
WBGene00016364	nhr-161	ZF-NHR
WBGene00016890	lst-5	ZF-C2H2
WBGene00018317	F41H10.4	bZIP
WBGene00018420	F44E2.7	ZF-C2H2
WBGene00018833	ztf-1	ZF-C2H2
WBGene00019521	dmd-7	Others	Dmrtc2	Dmrt1	DMRTA1
WBGene00019629	cid-1	ZF-C2H2	Tut7	Tut7	TUT7
WBGene00019864	ceh-93	HD
WBGene00020399	ztf-4	ZF-C2H2
WBGene00020930	hlh-30	bHLH
WBGene00021387	Y37F4.6	ZF-C2H2
WBGene00022762	ZK546.5	ZF-C2H2
WBGene00022805	nhr-256	ZF-NHR
WBGene00044508	nsy-7	HD
WBGene00044651	egrh-3	ZF-C2H2	Egr1	Egr1	EGR1

## Sheet: Mammalian orthologs
Mammal orthologs for genes identified through both distal and proximal germline screens
WormBase Gene ID	Gene.Public.Name	TF family	Mouse (High)	Mouse (moderate)	Rat (High)	Rat (moderate)	Human (High)	Human (moderate)
WBGene00007732	spe-44	Others		Gmeb1	Gmeb2	Gmeb1		GMEB1
WBGene00001979	hmp-2	Others	Ctnnb1	Armc4	Jup	Ctnnb1	CTNNB1	JUP
WBGene00006943	wrm-1	Others		Jup		Jup		JUP
WBGene00003509	mxl-1	Others	Max	Usf1	Max	Usf1	MAX	USF1
WBGene00003510	mxl-2	Others	Mlx		Mlx		MLX
WBGene00013878	atfs-1	bZIP		Atf5	Atf5			ATF4
WBGene00018317	F41H10.4	bZIP	Gripap1		Gripap1		GRIPAP1
WBGene00002783	let-607	bZIP	Creb3l3	Creb3l4	Creb3l3	Creb3l4	CREB3L3	CREB3L4
WBGene00009084	F23B12.7	Others	Cebpz		Cebpz		CEBPZ
WBGene00000443	ceh-20	HD	Pbx1	Pbx3	Pbx3	Pbx2	PBX1	PBX2
WBGene00000461	ceh-40	HD		Pbx3	Pbx2	Pbx4		PBX2
WBGene00003912	pal-1	HD	Cdx1	Cdx4	Cdx1		CDX1	CDX2
WBGene00003000	lin-11	HD	Lhx5		Lhx1		LHX1	LHX5
WBGene00001973	hmg-3	HMG		Ssrp1	Ssrp1			SSRP1
WBGene00004077	pop-1	HMG	Tcf7l2	Lef1	Lef1	Tcf7l1	TCF7L2	LEF1
WBGene00012209	W02D9.3	HMG	Hmg20a	Hmg20b	Hmg20b	Hmg20a	HMG20A	HMG20B
WBGene00022182	Y71H2AM.17	HMG	Smarce1		Smarce1	Smarce1l	SMARCE1
WBGene00001975	hmg-5	HMG	Tfam	Ubtf	Tfam	Ubtf	TFAM	UBTF
WBGene00003148	mbf-1	Others	Edf1		Edf1		EDF1
WBGene00001470	baz-2	Others	Baz2b	Cecr2	Baz2b	Baz2a	BAZ2B
WBGene00000899	daf-3	Others		Smad4		Smad4		SMAD4
WBGene00003592	nfi-1	Others	Nfic	Nfix	Nfic	Nf1x	NFIC	NFIA
WBGene00006445	tag-68	Others	Smad7	Smad6	Smad7	Smad6	SMAD7	SMAD6
WBGene00001029	dnj-11	MYB	Dnajc2		Dnajc2		DNAJC2
WBGene00015091	B0261.1	MYB	Bdp1		Bdp1		BDP1
WBGene00020111	R151.8	MYB	Cramp1l		Cramp1		CRAMP1
WBGene00001565	gei-8	MYB	Ncor1	Ncor2	Ncor2	Ncor1	NCOR1	NCOR2
WBGene00008386	cdc-5L	MYB	Cdc5l		Cdc5l		CDC5L
WBGene00018836	F54F2.9	MYB	Dnajc1		Dnajc1		DNAJC1
WBGene00001568	snpc-4	MYB	Snapc4	4932411N23Rik	Snapc4		SNAPC4	MYB
WBGene00008999	F21A10.2	Others	Myrfl	Myrf	Myrfl		MYRF	MYRFL
WBGene00006543	tbx-2	T-box	Tbx2	Tbx3	Tbx2	Tbx4	TBX2	TBX3
WBGene00006547	tbx-11	T-box		Tbx21		Tbx21	TBX21	EOMES
WBGene00006552	tbx-33	T-box		Tbx21		Tbx21		EOMES
WBGene00006542	tbp-1	Others	Tbp	Tbpl2	Tbp	Tbpl2	TBP	TBPL2
WBGene00001208	egl-44	Others	Tead1	Tead3	Tead2	Tead1	TEAD3	TEAD4
WBGene00016269	C30G4.4	Others		Tsc22d3		Tsc22d3		TSC22D3
WBGene00000914	daf-19	WH	Rfx3	Rfx2	Rfx1	Rfx2	RFX3	RFX1
WBGene00001162	efl-2	WH	E2f2	E2f3	E2f6	E2f1	E2F2	E2F1
WBGene00002004	hsf-1	WH	Hsf1	Hsf2	Hsf4	Hsfy2	HSF1	HSF2
WBGene00016029	elf-1	WH	Elf2	Elf4	Elf2	Elf1	ELF2	ELF1
WBGene00009133	bed-3	Others		Zbed4	Zbed4			ZBED1
WBGene00007223	C01F6.9	ZF	Zfp706		Zfp706		ZNF706
WBGene00008683	repo-1	ZF	Sf3a2		Sf3a2		SF3A2
WBGene00013236	ZNF-593	ZF	Zfp593		Zfp593		ZNF593
WBGene00013270	Y57A10A.31	ZF	Rnf216	Rbck1	Rnf216		RNF216
WBGene00007105	B0035.1	ZF	Zfp207		Zfp207		ZNF207
WBGene00011639	ztf-17	ZF	Zfp42				ZFP42
WBGene00013465	Y67H2A.10	ZF	Jazf1		Jazf1		JAZF1
WBGene00015809	C16A3.4	ZF	Zfp622		Zfp622	LOC103690028	ZNF622
WBGene00009508	row-1	ZF	Pogz	Zfp280d	Pogz	LOC103690173	POGZ	ZNF280D
WBGene00009937	lsl-1	ZF					ZNF581
WBGene00001324	eor-1	ZF	Zbtb38		Zbtb38		ZBTB38
WBGene00009553	F39B2.1	ZF	Hinfp		Hinfp		HINFP
WBGene00003231	mex-6	ZF		Zfp36l3		LOC100911319		ZFP36L1
WBGene00001186	egl-18	ZF		Gata4		Gata3		GATA4
WBGene00015981	elt-7	ZF		Gata6		Gata4		GATA1
WBGene00003628	nhr-35	NHR		Hnf4g		Hnf4g		HNF4A
WBGene00003630	nhr-40	NHR		Hnf4g		Hnf4g		HNF4A
WBGene00003638	nhr-48	NHR		Vdr	Nr1i2	Nr1i3		VDR
WBGene00003639	nhr-49	NHR		Hnf4g		Hnf4g		HNF4A
WBGene00003659	nhr-69	NHR	Hnf4a	Hnf4g		Hnf4g		HNF4A
WBGene00018265	nhr-182	NHR		Rorb		Rorb		PPARD
WBGene00000459	ceh-38	HD		Onecut1		Onecut1		ONECUT3
WBGene00001061	dpl-1	WH	Tfdp1		Tfdp1	Tfdp2	TFDP2	TFDP3
WBGene00001971	hmg-1.1	HMG		Hmgb3	LOC108349258	RGD1559962		HMGB3
WBGene00002169	isw-1	AT-hook	Smarca1	Smarca5	Smarca1	Smarca5	SMARCA1	SMARCA5
WBGene00002717	let-526	Others	Arid1a	Arid1b	Arid1a	Arid1b	ARID1B
WBGene00003024	lin-39	HD	Hoxa5	Hoxb5	Hoxa5	Hoxc6	HOXA5	HOXB5
WBGene00003037	lin-54	Others	Lin54	Tesmin	Lin54	Tesmin	LIN54	TESMIN
WBGene00003600	nhr-1	ZF-NHR		Hnf4g		Hnf4a		HNF4G
WBGene00003624	nhr-28	ZF-NHR						PPARD
WBGene00003704	nhr-114	ZF-NHR		Hnf4g		Hnf4a		HNF4G
WBGene00004203	swsn-1	MYB	Smarcc2	Smarcc1	Smarcc1	Smarcc2	SMARCC2	SMARCC1
WBGene00004862	sma-9	ZF-C2H2	Hivep1	Hivep2	Hivep2		HIVEP1	HIVEP3
WBGene00009009	F21D5.4	Others		Pogk	Pogk	Tigd5	POGK	TIGD1
WBGene00009772	ztf-7	ZF-C2H2	Zfp277		Zfp277		ZNF277
WBGene00012005	jun-1	bZIP	Jun		Jun		JUND
WBGene00013150	Y53F4B.3	Others	Pole4	Chrac1	Pole4	Chrac1	POLE4	CHRAC1
WBGene00013734	Y111B2A.10	ZF-C2H2					ZNF689
WBGene00016364	nhr-161	ZF-NHR						PPARA
WBGene00019521	dmd-7	Others		Dmrt1		Dmrt1		DMRTA1
WBGene00019629	cid-1	ZF-C2H2	Tut7	Tut4	Tut7	Tut4	TUT7	TUT4
WBGene00019864	ceh-93	HD		Rps6kb2				RPS6KB2
WBGene00020399	ztf-4	ZF-C2H2	Ralyl	Hnrnpc	Hnrnpc		RALY	NCOA5
WBGene00020930	hlh-30	bHLH	Tfe3	Mitf	Tfeb	Tfec	TFEB	TFEC
WBGene00022805	nhr-256	ZF-NHR				Ppara		PPARA
WBGene00044651	egrh-3	ZF-C2H2		Egr1		Egr1		EGR1

## Sheet: GO - reproduction in mouse
Mouse orthologs with GO involved in reproduction (Distal germline)
Gene name	Primary source	Gene product name	Direct annotation	GO_term	Involved in
Zfp42	MGI:MGI:99187	zinc finger protein 42	spermatid development|RNA polymerase II cis-regulatory region sequence-specific DNA binding|DNA-binding transcription activator activity, RNA polymerase II-specific|sequence-specific DNA binding|positive regulation of transcription by RNA polymerase II|DNA-binding transcription factor activity, RNA polymerase II-specific|regulation of transcription by RNA polymerase II|DNA binding|transcription r…	GO:0007286|GO:0000978|GO:0001228|GO:0043565|GO:0045944|GO:0000981|GO:0006357|GO:0003677|GO:0005667|GO:0005634|GO:0005515|GO:1990830|GO:0005737|GO:0046872|GO:0001701|GO:0031519|GO:0032991|GO:1990837|GO:0071514	heterocyclic compound binding|RNA polymerase II cis-regulatory region sequence-specific DNA binding|RNA polymerase II transcription regulatory region sequence-specific DNA binding|double-stranded DNA binding|cis-regulatory region sequence-specific DNA binding|transcription cis-regulatory region binding|sequence-specific DNA binding|binding|molecular_function|nucleic acid binding|transcription reg…
Smad4	MGI:MGI:894293	SMAD family member 4	RNA polymerase II transcription regulator complex|male gonad development|endoderm development|RNA polymerase II cis-regulatory region sequence-specific DNA binding|RNA polymerase II transcription regulatory region sequence-specific DNA binding|mesoderm development|anterior/posterior pattern specification|transcription cis-regulatory region binding|axon guidance|negative regulation of cardiac myof…	GO:0090575|GO:0008584|GO:0007492|GO:0000978|GO:0000977|GO:0007498|GO:0009952|GO:0000976|GO:0007411|GO:1905305|GO:0008585|GO:0001666|GO:0045892|GO:0030308|GO:0045893|GO:0001822|GO:0001701|GO:0001702|GO:0032444|GO:0035556|GO:0043199|GO:0003220|GO:0000981|GO:0005634|GO:0005515|GO:0005518|GO:0046872|GO:0051098|GO:0010666|GO:0001837|GO:0008283|GO:0008285|GO:0009653|GO:0045944|GO:0003279|GO:0003148|GO:…	regulation of nucleobase-containing compound metabolic process|negative regulation of metabolic process|negative regulation of biosynthetic process|negative regulation of nitrogen compound metabolic process|regulation of nitrogen compound metabolic process|negative regulation of biological process|regulation of nucleic acid-templated transcription|negative regulation of nucleic acid-templated tra…
Gata4	MGI:MGI:95664	GATA binding protein 4	response to estrogen|atrial septum secundum morphogenesis|male gonad development|RNA polymerase II transcription regulator complex|RNA polymerase II cis-regulatory region sequence-specific DNA binding|RNA polymerase II transcription regulatory region sequence-specific DNA binding|Sertoli cell differentiation|transcription cis-regulatory region binding|positive regulation of angiogenesis|cellular …	GO:0043627|GO:0003290|GO:0008584|GO:0090575|GO:0000978|GO:0000977|GO:0060008|GO:0000976|GO:0045766|GO:0071372|GO:0071371|GO:0045893|GO:0001701|GO:0001702|GO:0001947|GO:0001706|GO:0051525|GO:0019901|GO:0003180|GO:0003181|GO:0086004|GO:0007267|GO:0000987|GO:0061049|GO:0000981|GO:0003215|GO:0005634|GO:0051896|GO:0005515|GO:0046872|GO:0010667|GO:0060540|GO:1905204|GO:0003151|GO:0045787|GO:0009410|GO:…	intracellular organelle|cell|biological entity|protein-containing material entity|intracellular non-membrane-bounded organelle|chromosome|cellular anatomical entity|organelle|chromatin|cellular_component|intracellular anatomical structure|non-membrane-bounded organelle|anatomical structure|anatomical entity|material anatomical entity|connected anatomical structure|protein-DNA complex|protein-cont…
Vdr	MGI:MGI:103076	vitamin D (1,25-dihydroxyvitamin D3) receptor	RNA polymerase II transcription regulator complex|RNA polymerase II cis-regulatory region sequence-specific DNA binding|small molecule binding|caveola|skeletal system development|negative regulation of DNA-templated transcription|intracellular membrane-bounded organelle|vitamin D receptor signaling pathway|cytosol|vitamin D response element binding|positive regulation of parathyroid hormone secre…	GO:0090575|GO:0000978|GO:0036094|GO:0005901|GO:0001501|GO:0045892|GO:0043231|GO:0070561|GO:0005829|GO:0070644|GO:2000830|GO:0070564|GO:0051924|GO:0030501|GO:0035435|GO:0042789|GO:0045618|GO:0008270|GO:0038186|GO:0000902|GO:1902121|GO:0038183|GO:0060558|GO:0043235|GO:1903412|GO:0009887|GO:0000792|GO:0005634|GO:0000791|GO:0005515|GO:0046872|GO:0010628|GO:0016363|GO:0010980|GO:1902098|GO:0007275|GO:…	regulation of nucleobase-containing compound metabolic process|negative regulation of metabolic process|negative regulation of biosynthetic process|negative regulation of nitrogen compound metabolic process|regulation of nitrogen compound metabolic process|negative regulation of biological process|regulation of nucleic acid-templated transcription|negative regulation of nucleic acid-templated tra…
Eomes	MGI:MGI:1201683	eomesodermin	endoderm development|RNA polymerase II cis-regulatory region sequence-specific DNA binding|RNA polymerase II transcription regulatory region sequence-specific DNA binding|neurogenesis|cerebral cortex regionalization|mesodermal to mesenchymal transition involved in gastrulation|type II interferon production|skeletal muscle cell differentiation|positive regulation of DNA-templated transcription|bla…	GO:0007492|GO:0000978|GO:0000977|GO:0022008|GO:0021796|GO:0060809|GO:0032609|GO:0035914|GO:0045893|GO:0001824|GO:0001706|GO:0001707|GO:0001829|GO:0019827|GO:0030182|GO:0002250|GO:0043433|GO:0007420|GO:0021987|GO:0000785|GO:0002376|GO:0000981|GO:0005634|GO:0001714|GO:0010468|GO:0010467|GO:0007275|GO:0080111|GO:0009653|GO:0043565|GO:0045944|GO:0021772|GO:0021895|GO:0005654|GO:0000122|GO:0003700|GO:…	regulation of nucleobase-containing compound metabolic process|negative regulation of metabolic process|negative regulation of biosynthetic process|negative regulation of nitrogen compound metabolic process|regulation of nitrogen compound metabolic process|negative regulation of biological process|regulation of nucleic acid-templated transcription|negative regulation of nucleic acid-templated tra…
Mybl1	MGI:MGI:99925	myeloblastosis oncogene-like 1	spermatogenesis|RNA polymerase II cis-regulatory region sequence-specific DNA binding|male meiosis I|regulation of DNA-templated transcription|DNA-binding transcription activator activity, RNA polymerase II-specific|positive regulation of transcription by RNA polymerase II|mitotic cell cycle|DNA-binding transcription factor activity, RNA polymerase II-specific|nucleoplasm|DNA binding|nucleus|prom…	GO:0007283|GO:0000978|GO:0007141|GO:0006355|GO:0001228|GO:0045944|GO:0000278|GO:0000981|GO:0005654|GO:0003677|GO:0005634|GO:1990841|GO:0010529|GO:0030154|GO:0140543	heterocyclic compound binding|RNA polymerase II cis-regulatory region sequence-specific DNA binding|RNA polymerase II transcription regulatory region sequence-specific DNA binding|double-stranded DNA binding|cis-regulatory region sequence-specific DNA binding|transcription cis-regulatory region binding|sequence-specific DNA binding|binding|molecular_function|nucleic acid binding|transcription reg…
Lhx1	MGI:MGI:99783	LIM homeobox protein 1	head development|retina development in camera-type eye|ventral spinal cord development|endoderm development|post-embryonic development|RNA polymerase II transcription regulatory region sequence-specific DNA binding|anterior/posterior pattern specification|transcription by RNA polymerase II|forebrain regionalization|spinal cord development|dorsal/ventral pattern formation|transcription regulator c…	GO:0060322|GO:0060041|GO:0021517|GO:0007492|GO:0009791|GO:0000977|GO:0009952|GO:0006366|GO:0021871|GO:0021510|GO:0009953|GO:0005667|GO:0009948|GO:0045892|GO:0045893|GO:0001822|GO:0001823|GO:0001702|GO:0001705|GO:0001706|GO:0032525|GO:0021702|GO:0030182|GO:0021549|GO:0009880|GO:0007267|GO:0000987|GO:0007389|GO:0048646|GO:0061205|GO:0000981|GO:0005634|GO:0090190|GO:0005515|GO:0046872|GO:2000768|GO:…	biological_process|metanephros development|system development|kidney development|multicellular organism development|renal system development|anatomical structure development|animal organ development|developmental process|multicellular organismal process|epithelial tube morphogenesis|renal tubule morphogenesis|anatomical structure morphogenesis|epithelium development|branching morphogenesis of an …
Hsf1	MGI:MGI:96238	heat shock factor 1	DNA repair|RNA polymerase II cis-regulatory region sequence-specific DNA binding|transcription cis-regulatory region binding|positive regulation of tyrosine phosphorylation of STAT protein|positive regulation of DNA-binding transcription factor activity|protein self-association|epithelial cell proliferation|positive regulation of macrophage differentiation|protein heterodimerization activity|in u…	GO:0006281|GO:0000978|GO:0000976|GO:0042531|GO:0051091|GO:0043621|GO:0050673|GO:0045651|GO:0046982|GO:0001701|GO:0034620|GO:0032720|GO:0019901|GO:0031072|GO:0065003|GO:0007143|GO:0006974|GO:1903936|GO:0045931|GO:0000981|GO:0005634|GO:0071480|GO:0001162|GO:0050680|GO:0010667|GO:0072738|GO:0071407|GO:0008283|GO:1900034|GO:0005694|GO:0071280|GO:0045944|GO:0040018|GO:0001892|GO:0000165|GO:0009408|GO:…	regulation of nucleobase-containing compound metabolic process|negative regulation of metabolic process|negative regulation of biosynthetic process|negative regulation of nitrogen compound metabolic process|regulation of nitrogen compound metabolic process|negative regulation of biological process|regulation of nucleic acid-templated transcription|negative regulation of nucleic acid-templated tra…
Hnf4a	MGI:MGI:109128	hepatic nuclear factor 4, alpha	RNA polymerase II cis-regulatory region sequence-specific DNA binding|signal transduction involved in regulation of gene expression|transcription cis-regulatory region binding|transcription by RNA polymerase II|DNA-binding transcription activator activity, RNA polymerase II-specific|negative regulation of tyrosine phosphorylation of STAT protein|positive regulation of gluconeogenesis|phospholipid…	GO:0000978|GO:0023019|GO:0000976|GO:0006366|GO:0001228|GO:0042532|GO:0045722|GO:0055091|GO:0044877|GO:0045723|GO:0006637|GO:0050796|GO:0009749|GO:0016290|GO:0005504|GO:0045892|GO:0000062|GO:0030308|GO:0045893|GO:0005829|GO:0070328|GO:0010470|GO:0008270|GO:0019904|GO:0042308|GO:0036042|GO:0060395|GO:0000987|GO:0045930|GO:0043433|GO:0000785|GO:0045216|GO:1902569|GO:0000981|GO:0005634|GO:0005515|GO:…	heterocyclic compound binding|sulfur compound binding|acyl-CoA binding|nucleoside phosphate binding|ion binding|small molecule binding|lipid binding|fatty acid derivative binding|anion binding|binding|molecular_function|nucleotide binding|adenyl ribonucleotide binding|organic cyclic compound binding|fatty-acyl-CoA binding|carbohydrate derivative binding|purine nucleotide binding|ribonucleotide bi…
Rfx2	MGI:MGI:106583	regulatory factor X, 2 (influences HLA class II expression)	cilium assembly|spermatid development|spermatogenesis|RNA polymerase II cis-regulatory region sequence-specific DNA binding|cell projection organization|RNA polymerase II transcription regulatory region sequence-specific DNA binding|regulation of DNA-templated transcription|DNA-binding transcription activator activity, RNA polymerase II-specific|positive regulation of transcription by RNA polymer…	GO:0060271|GO:0007286|GO:0007283|GO:0000978|GO:0030030|GO:0000977|GO:0006355|GO:0001228|GO:0045944|GO:0006357|GO:0000981|GO:0001675|GO:0003677|GO:0005634|GO:0003700|GO:1990830|GO:0005737|GO:0030154|GO:1990837	nucleic acid binding|DNA binding|transcription regulatory region nucleic acid binding|organic cyclic compound binding|heterocyclic compound binding|RNA polymerase II transcription regulatory region sequence-specific DNA binding|double-stranded DNA binding|transcription cis-regulatory region binding|sequence-specific DNA binding|sequence-specific double-stranded DNA binding|binding|molecular_funct…
Tead4	MGI:MGI:106907	TEA domain family member 4	RNA polymerase II cis-regulatory region sequence-specific DNA binding|DNA-binding transcription activator activity, RNA polymerase II-specific|sequence-specific DNA binding|positive regulation of transcription by RNA polymerase II|positive regulation of stem cell population maintenance|nucleoplasm|transcription regulator complex|DNA-binding transcription factor activity|positive regulation of DNA…	GO:0000978|GO:0001228|GO:0043565|GO:0045944|GO:1902459|GO:0005654|GO:0005667|GO:0003700|GO:0045893|GO:0001701|GO:0001825|GO:0001708|GO:0006351|GO:0006355|GO:0048568|GO:0007566|GO:0000981|GO:0006357|GO:0005634|GO:0003677|GO:0001830|GO:0005515|GO:0005737|GO:0045165|GO:0032993|GO:0035329	heterocyclic compound binding|RNA polymerase II cis-regulatory region sequence-specific DNA binding|RNA polymerase II transcription regulatory region sequence-specific DNA binding|double-stranded DNA binding|cis-regulatory region sequence-specific DNA binding|transcription cis-regulatory region binding|sequence-specific DNA binding|binding|molecular_function|nucleic acid binding|transcription reg…
Tbx3	MGI:MGI:98495	T-box 3	atrioventricular canal morphogenesis|RNA polymerase II cis-regulatory region sequence-specific DNA binding|DNA-binding transcription activator activity, RNA polymerase II-specific|cardiac muscle cell fate commitment|DNA-binding transcription repressor activity, RNA polymerase II-specific|branching involved in mammary gland duct morphogenesis|hepatoblast differentiation|embryonic digit morphogenes…	GO:1905222|GO:0000978|GO:0001228|GO:0060923|GO:0001227|GO:0060444|GO:0061017|GO:0042733|GO:0005667|GO:0003007|GO:0001501|GO:0045892|GO:0001701|GO:0045893|GO:0001947|GO:0072105|GO:0030540|GO:0001708|GO:0035115|GO:0055007|GO:0035116|GO:0060596|GO:0019827|GO:0008595|GO:0060317|GO:0000981|GO:0009887|GO:0005634|GO:0030857|GO:0005515|GO:0030539|GO:0045662|GO:2000648|GO:0042472|GO:0048332|GO:0035108|GO:…	regulation of nucleobase-containing compound metabolic process|negative regulation of metabolic process|negative regulation of biosynthetic process|negative regulation of nitrogen compound metabolic process|regulation of nitrogen compound metabolic process|negative regulation of biological process|regulation of nucleic acid-templated transcription|negative regulation of nucleic acid-templated tra…
Pbx1	MGI:MGI:97495	pre B cell leukemia homeobox 1	RNA polymerase II transcription regulator complex|embryonic hemopoiesis|RNA polymerase II cis-regulatory region sequence-specific DNA binding|RNA polymerase II transcription regulatory region sequence-specific DNA binding|anterior/posterior pattern specification|transcription cis-regulatory region binding|DNA-binding transcription activator activity, RNA polymerase II-specific|proximal/distal pat…	GO:0090575|GO:0035162|GO:0000978|GO:0000977|GO:0009952|GO:0000976|GO:0001228|GO:0009954|GO:0005667|GO:0010971|GO:0043433|GO:0048568|GO:0006694|GO:0007420|GO:0000981|GO:0009887|GO:0005634|GO:0005515|GO:2000648|GO:0008283|GO:0007275|GO:0045665|GO:0048536|GO:0043565|GO:0045944|GO:0005654|GO:0048538|GO:0030326|GO:0003700|GO:0007548|GO:0000086|GO:0072089|GO:0140297|GO:0030325|GO:0006355|GO:0048666|GO:…	nucleic acid binding|DNA binding|transcription regulatory region nucleic acid binding|organic cyclic compound binding|heterocyclic compound binding|double-stranded DNA binding|transcription cis-regulatory region binding|sequence-specific DNA binding|sequence-specific double-stranded DNA binding|binding|molecular_function|RNA polymerase II transcription regulatory region sequence-specific DNA bind…
Cecr2	MGI:MGI:1923799	CECR2, histone acetyl-lysine reader	neural tube development|inner ear receptor cell stereocilium organization|cochlea development|ISWI-type complex|chromatin organization|execution phase of apoptosis|single fertilization|nucleus|chromatin remodeling|euchromatin|neural fold formation|neural tube closure|ATP-dependent chromatin remodeler activity|CERF complex	GO:0021915|GO:0060122|GO:0090102|GO:0031010|GO:0006325|GO:0097194|GO:0007338|GO:0005634|GO:0006338|GO:0000791|GO:0001842|GO:0001843|GO:0140658|GO:0090537	intracellular organelle|cell|biological entity|cellular anatomical entity|organelle|cellular_component|intracellular anatomical structure|membrane-bounded organelle|anatomical structure|anatomical entity|material anatomical entity|nucleus|connected anatomical structure|intracellular membrane-bounded organelle|protein-containing complex organization|biological_process|cellular component organizati…
Creb3l4	MGI:MGI:1916603	cAMP responsive element binding protein 3-like 4	multicellular organism development|spermatogenesis|RNA polymerase II cis-regulatory region sequence-specific DNA binding|RNA polymerase II transcription regulatory region sequence-specific DNA binding|regulation of DNA-templated transcription|DNA-binding transcription activator activity, RNA polymerase II-specific|endoplasmic reticulum|Golgi apparatus|Golgi membrane|positive regulation of transcr…	GO:0007275|GO:0007283|GO:0000978|GO:0000977|GO:0006355|GO:0001228|GO:0005783|GO:0005794|GO:0000139|GO:0045944|GO:0006986|GO:0005654|GO:0000981|GO:0006357|GO:0005634|GO:0003677|GO:0003700|GO:0031965|GO:0005739|GO:0016020|GO:0030154|GO:0031410|GO:0005829|GO:1990837	nucleic acid binding|DNA binding|transcription regulatory region nucleic acid binding|organic cyclic compound binding|heterocyclic compound binding|RNA polymerase II transcription regulatory region sequence-specific DNA binding|double-stranded DNA binding|transcription cis-regulatory region binding|sequence-specific DNA binding|sequence-specific double-stranded DNA binding|binding|molecular_funct…
Tcf7l2	MGI:MGI:1202879	transcription factor 7 like 2, T cell specific, HMG box	neural tube development|regulation of insulin secretion involved in cellular response to glucose stimulus|negative regulation of fibroblast growth factor receptor signaling pathway|nuclear receptor binding|positive regulation of protein binding|secretory granule localization|insulin metabolic process|RNA polymerase II cis-regulatory region sequence-specific DNA binding|post-embryonic development|…	GO:0021915|GO:0061178|GO:0040037|GO:0016922|GO:0032092|GO:0032252|GO:1901142|GO:0000978|GO:0009791|GO:0048713|GO:0000976|GO:0045721|GO:0008543|GO:0001228|GO:0048557|GO:0045444|GO:0006006|GO:0043588|GO:0060325|GO:0045722|GO:0045295|GO:0005667|GO:0009749|GO:0050673|GO:0045892|GO:1990841|GO:0045893|GO:0001701|GO:0030509|GO:0048641|GO:2000675|GO:0005829|GO:0016055|GO:0070369|GO:0050679|GO:0060090|GO:…	regulation of nucleobase-containing compound metabolic process|negative regulation of metabolic process|negative regulation of biosynthetic process|negative regulation of nitrogen compound metabolic process|regulation of nitrogen compound metabolic process|negative regulation of biological process|regulation of nucleic acid-templated transcription|negative regulation of nucleic acid-templated tra…
Ctnnb1	MGI:MGI:88276	catenin (cadherin associated protein), beta 1	lung-associated mesenchyme development|negative regulation of angiogenesis|mesenchyme development|lung epithelial cell differentiation|Scrib-APC-beta-catenin complex|RNA polymerase II transcription regulator complex|protein localization|synaptic vesicle clustering|hair cycle process|positive regulation of DNA-binding transcription factor activity|skin development|regulation of timing of anagen|ti…	GO:0060484|GO:0016525|GO:0060485|GO:0060487|GO:0034750|GO:0090575|GO:0008104|GO:0097091|GO:0022405|GO:0051091|GO:0043588|GO:0051884|GO:0070160|GO:0070161|GO:0045892|GO:0048489|GO:0045893|GO:0001701|GO:0001822|GO:1990403|GO:0001944|GO:0001702|GO:0001706|GO:0098978|GO:0001708|GO:0070602|GO:0030027|GO:0019901|GO:0019903|GO:0007268|GO:0003340|GO:0061324|GO:0044325|GO:0003223|GO:0005886|GO:0060479|GO:…	regulation of nucleobase-containing compound metabolic process|negative regulation of metabolic process|negative regulation of biosynthetic process|negative regulation of nitrogen compound metabolic process|regulation of nitrogen compound metabolic process|negative regulation of biological process|regulation of nucleic acid-templated transcription|negative regulation of nucleic acid-templated tra…
Mouse orthologs with GO involved in reproduction (Proximal germline)
Gene name	Primary source	Gene product name	Direct annotation	GO_term	Involved in
Zfp42	MGI:MGI:99187	zinc finger protein 42	spermatid development|RNA polymerase II cis-regulatory region sequence-specific DNA binding|DNA-binding transcription activator activity, RNA polymerase II-specific|sequence-specific DNA binding|positive regulation of transcription by RNA polymerase II|DNA-binding transcription factor activity, RNA polymerase II-specific|regulation of transcription by RNA polymerase II|DNA binding|transcription r…	GO:0007286|GO:0000978|GO:0001228|GO:0043565|GO:0045944|GO:0000981|GO:0006357|GO:0003677|GO:0005667|GO:0005634|GO:0005515|GO:1990830|GO:0005737|GO:0046872|GO:0001701|GO:0031519|GO:0032991|GO:1990837|GO:0071514	heterocyclic compound binding|RNA polymerase II cis-regulatory region sequence-specific DNA binding|RNA polymerase II transcription regulatory region sequence-specific DNA binding|double-stranded DNA binding|cis-regulatory region sequence-specific DNA binding|transcription cis-regulatory region binding|sequence-specific DNA binding|binding|molecular_function|nucleic acid binding|transcription reg…
Arid1a	MGI:MGI:1935147	AT rich interactive domain 1A (SWI-like)	nuclear receptor binding|regulation of mitotic metaphase/anaphase transition|nervous system development|brahma complex|positive regulation of myoblast differentiation|regulation of nucleotide-excision repair|chromatin organization|positive regulation of stem cell population maintenance|nucleoplasm|negative regulation of transcription by RNA polymerase II|chromatin remodeling|cardiac chamber devel…	GO:0016922|GO:0030071|GO:0007399|GO:0035060|GO:0045663|GO:2000819|GO:0006325|GO:1902459|GO:0005654|GO:0000122|GO:0006338|GO:0003205|GO:0030900|GO:0001843|GO:0045893|GO:0140658|GO:0003408|GO:0001704|GO:0030521|GO:0070603|GO:0030520|GO:0055007|GO:0042921|GO:0016514|GO:0019827|GO:0060674|GO:0140092|GO:0031491|GO:0045597|GO:0000785|GO:0006337|GO:0007566|GO:0006357|GO:0007369|GO:0005634|GO:0003677|GO:…	intracellular organelle|cell|biological entity|protein-containing material entity|intracellular non-membrane-bounded organelle|chromosome|cellular anatomical entity|organelle|chromatin|cellular_component|intracellular anatomical structure|non-membrane-bounded organelle|anatomical structure|anatomical entity|material anatomical entity|connected anatomical structure|protein-DNA complex|protein-cont…
Egr1	MGI:MGI:95295	early growth response 1	double-stranded methylated DNA binding|RNA polymerase II core promoter sequence-specific DNA binding|circadian temperature homeostasis|RNA polymerase II cis-regulatory region sequence-specific DNA binding|RNA polymerase II transcription regulatory region sequence-specific DNA binding|double-stranded DNA binding|transcription cis-regulatory region binding|DNA-binding transcription activator activi…	GO:0010385|GO:0000979|GO:0060086|GO:0000978|GO:0000977|GO:0003690|GO:0000976|GO:0001228|GO:0061418|GO:0007611|GO:1902949|GO:0009749|GO:0032922|GO:0001666|GO:1990841|GO:0035914|GO:0045893|GO:0048169|GO:0030509|GO:0072303|GO:0032722|GO:0008270|GO:0035035|GO:0044849|GO:0044729|GO:1901875|GO:0042981|GO:0000785|GO:0000981|GO:0007616|GO:0030217|GO:0005634|GO:0071480|GO:0046872|GO:0010628|GO:2000182|GO:…	intracellular organelle|cell|biological entity|protein-containing material entity|intracellular non-membrane-bounded organelle|chromosome|cellular anatomical entity|organelle|chromatin|cellular_component|intracellular anatomical structure|non-membrane-bounded organelle|anatomical structure|anatomical entity|material anatomical entity|connected anatomical structure|protein-DNA complex|protein-cont…
Dmrtc2	MGI:MGI:1918491	doublesex and mab-3 related transcription factor like family C2	heterochromatin organization|spermatid nucleus elongation|identical protein binding|male meiosis I|regulation of DNA-templated transcription|sequence-specific DNA binding|DNA binding|nucleus|XY body|sex differentiation|metal ion binding|cell differentiation|sequence-specific double-stranded DNA binding	GO:0070828|GO:0007290|GO:0042802|GO:0007141|GO:0006355|GO:0043565|GO:0003677|GO:0005634|GO:0001741|GO:0007548|GO:0046872|GO:0030154|GO:1990837	nucleic acid binding|DNA binding|organic cyclic compound binding|heterocyclic compound binding|binding|molecular_function|biological regulation|biological_process|regulation of RNA biosynthetic process|regulation of nucleobase-containing compound metabolic process|regulation of macromolecule metabolic process|regulation of DNA-templated transcription|regulation of nitrogen compound metabolic proc…
Hmgb2	MGI:MGI:96157	high mobility group box 2	male gonad development|double-stranded DNA binding|transcription cis-regulatory region binding|DNA binding, bending|chemoattractant activity|positive regulation of DNA binding|extrinsic apoptotic signaling pathway via death domain receptors|positive regulation of erythrocyte differentiation|cell chemotaxis|inflammatory response|inflammatory response to antigenic stimulus|negative regulation of DN…	GO:0008584|GO:0003690|GO:0000976|GO:0008301|GO:0042056|GO:0043388|GO:0008625|GO:0045648|GO:0060326|GO:0006954|GO:0002437|GO:0045892|GO:0045893|GO:0032728|GO:0050830|GO:1902042|GO:0019904|GO:0045654|GO:0000987|GO:0000785|GO:0002376|GO:0000793|GO:0005634|GO:0010629|GO:0005515|GO:0010628|GO:0032991|GO:0050767|GO:0032075|GO:0072091|GO:0008289|GO:0005694|GO:0005576|GO:0005730|GO:0045944|GO:0005654|GO:…	regulation of nucleobase-containing compound metabolic process|negative regulation of metabolic process|negative regulation of biosynthetic process|negative regulation of nitrogen compound metabolic process|regulation of nitrogen compound metabolic process|negative regulation of biological process|regulation of nucleic acid-templated transcription|negative regulation of nucleic acid-templated tra…
Hnf4a	MGI:MGI:109128	hepatic nuclear factor 4, alpha	RNA polymerase II cis-regulatory region sequence-specific DNA binding|signal transduction involved in regulation of gene expression|transcription cis-regulatory region binding|transcription by RNA polymerase II|DNA-binding transcription activator activity, RNA polymerase II-specific|negative regulation of tyrosine phosphorylation of STAT protein|positive regulation of gluconeogenesis|phospholipid…	GO:0000978|GO:0023019|GO:0000976|GO:0006366|GO:0001228|GO:0042532|GO:0045722|GO:0055091|GO:0044877|GO:0045723|GO:0006637|GO:0050796|GO:0009749|GO:0016290|GO:0005504|GO:0045892|GO:0000062|GO:0030308|GO:0045893|GO:0005829|GO:0070328|GO:0010470|GO:0008270|GO:0019904|GO:0042308|GO:0036042|GO:0060395|GO:0000987|GO:0045930|GO:0043433|GO:0000785|GO:0045216|GO:1902569|GO:0000981|GO:0005634|GO:0005515|GO:…	heterocyclic compound binding|sulfur compound binding|acyl-CoA binding|nucleoside phosphate binding|ion binding|small molecule binding|lipid binding|fatty acid derivative binding|anion binding|binding|molecular_function|nucleotide binding|adenyl ribonucleotide binding|organic cyclic compound binding|fatty-acyl-CoA binding|carbohydrate derivative binding|purine nucleotide binding|ribonucleotide bi…
Tesmin	MGI:MGI:1340029	testis expressed metallothionein like	nucleus|meiotic cell cycle|cytoplasm|multicellular organism development|male meiotic nuclear division|spermatogenesis|cell differentiation|regulation of DNA-templated transcription|male germ cell nucleus	GO:0005634|GO:0051321|GO:0005737|GO:0007275|GO:0007140|GO:0007283|GO:0030154|GO:0006355|GO:0001673	intracellular organelle|cell|biological entity|cellular anatomical entity|organelle|cellular_component|intracellular anatomical structure|membrane-bounded organelle|anatomical structure|anatomical entity|material anatomical entity|nucleus|connected anatomical structure|intracellular membrane-bounded organelle|cytoplasm|biological_process|multicellular organismal reproductive process|male meiotic …
Junb	MGI:MGI:96647	jun B proto-oncogene	RNA polymerase II transcription regulator complex|RNA polymerase II cis-regulatory region sequence-specific DNA binding|double-stranded DNA binding|RNA polymerase II transcription regulatory region sequence-specific DNA binding|transcription by RNA polymerase II|DNA-binding transcription activator activity, RNA polymerase II-specific|sequence-specific DNA binding|decidualization|vasculogenesis|po…	GO:0090575|GO:0000978|GO:0003690|GO:0000977|GO:0006366|GO:0001228|GO:0043565|GO:0046697|GO:0001570|GO:0045944|GO:0005654|GO:0002158|GO:0005667|GO:0003700|GO:0071277|GO:0001701|GO:0035976|GO:0001649|GO:0051726|GO:0001829|GO:0006355|GO:0045597|GO:0008134|GO:0060136|GO:0042127|GO:0000981|GO:0006357|GO:0030316|GO:0003677|GO:0005634|GO:0005515|GO:0060716|GO:0030154|GO:0033687|GO:1990837	heterocyclic compound binding|RNA polymerase II cis-regulatory region sequence-specific DNA binding|RNA polymerase II transcription regulatory region sequence-specific DNA binding|double-stranded DNA binding|cis-regulatory region sequence-specific DNA binding|transcription cis-regulatory region binding|sequence-specific DNA binding|binding|molecular_function|nucleic acid binding|transcription reg…
Tut7	MGI:MGI:2387179	terminal uridylyl transferase 7	miRNA binding|zinc ion binding|nucleotidyltransferase activity|pre-miRNA processing|polyuridylation-dependent mRNA catabolic process|nucleoplasm|nucleic acid binding|RNA uridylyltransferase activity|RNA 3' uridylation|oocyte maturation|cytoplasm|metal ion binding|retrotransposon silencing by mRNA destabilization|RNA 3'-end processing|cytosol|transferase activity|miRNA metabolic process|uridylyltr…	GO:0035198|GO:0008270|GO:0016779|GO:0031054|GO:1990074|GO:0005654|GO:0003676|GO:0050265|GO:0071076|GO:0001556|GO:0005737|GO:0046872|GO:0141008|GO:0031123|GO:0005829|GO:0016740|GO:0010586|GO:0070569	female gamete generation|anatomical structure development|oocyte differentiation|gamete generation|developmental process involved in reproduction|multicellular organism reproduction|anatomical structure maturation|developmental process|multicellular organismal process|germ cell development|biological_process|multicellular organismal reproductive process|reproductive process|developmental maturati…

## Sheet: GO - reproduction in rat
Rat orthologs with GO involved in reproduction (Distal germline)
Gene name	Primary source	Gene product name	Direct annotation	GO_term	Involved in
Ncor2	RGD:1310293	nuclear receptor co-repressor 2	nuclear receptor binding|nuclear body|telencephalon development|positive regulation of protein deacetylation|negative regulation of miRNA transcription|epidermis development|histone deacetylase complex|Notch binding|lactation|sequence-specific DNA binding|nuclear retinoic acid receptor binding|establishment of skin barrier|nucleoplasm|protein-containing complex binding|negative regulation of andr…	GO:0016922|GO:0016604|GO:0021537|GO:0090312|GO:1902894|GO:0008544|GO:0000118|GO:0005112|GO:0007595|GO:0043565|GO:0042974|GO:0061436|GO:0005654|GO:0044877|GO:0060766|GO:0000122|GO:0050872|GO:0003007|GO:0030900|GO:0045892|GO:0001701|GO:0060509|GO:0035259|GO:0044849|GO:0042826|GO:0021549|GO:0021846|GO:0045599|GO:1903799|GO:0006476|GO:0003682|GO:0000785|GO:0046965|GO:0003677|GO:0005634|GO:0005515|GO:…	catalytic complex|intracellular organelle|cell|protein-containing material entity|histone deacetylase complex|organelle|cellular_component|nucleoplasm|membrane-bounded organelle|anatomical entity|material anatomical entity|connected anatomical structure|nuclear protein-containing complex|intracellular membrane-bounded organelle|membrane-enclosed lumen|biological entity|organelle lumen|cellular an…
Lhx1	RGD:71074	LIM homeobox 1	head development|retina development in camera-type eye|endoderm development|ventral spinal cord development|post-embryonic development|anterior/posterior pattern specification|RNA polymerase II transcription regulatory region sequence-specific DNA binding|transcription by RNA polymerase II|forebrain regionalization|dorsal/ventral pattern formation|spinal cord development|transcription regulator c…	GO:0060322|GO:0060041|GO:0007492|GO:0021517|GO:0009791|GO:0009952|GO:0000977|GO:0006366|GO:0021871|GO:0009953|GO:0021510|GO:0005667|GO:0009948|GO:0045892|GO:0072224|GO:0001822|GO:0045893|GO:0001702|GO:0001823|GO:0001705|GO:0001706|GO:0032525|GO:0021702|GO:0021549|GO:0030182|GO:0009880|GO:0007267|GO:0000987|GO:0007389|GO:0048646|GO:0061205|GO:0000981|GO:0005634|GO:0090190|GO:0046872|GO:2000768|GO:…	nucleic acid binding|DNA binding|transcription regulatory region nucleic acid binding|organic cyclic compound binding|heterocyclic compound binding|double-stranded DNA binding|cis-regulatory region sequence-specific DNA binding|transcription cis-regulatory region binding|sequence-specific DNA binding|sequence-specific double-stranded DNA binding|binding|molecular_function|biological_process|uroge…
E2f1	RGD:728892	E2F transcription factor 1	RNA polymerase II transcription regulator complex|cellular response to nerve growth factor stimulus|RNA polymerase II cis-regulatory region sequence-specific DNA binding|transcription cis-regulatory region binding|transcription regulator complex|negative regulation of DNA binding|forebrain development|negative regulation of DNA-templated transcription|positive regulation of DNA-templated transcri…	GO:0090575|GO:1990090|GO:0000978|GO:0000976|GO:0005667|GO:0043392|GO:0030900|GO:0045892|GO:0045893|GO:0005509|GO:0071930|GO:0051726|GO:0071456|GO:0060090|GO:0019901|GO:0000228|GO:0000987|GO:0043276|GO:0008630|GO:0043433|GO:0046983|GO:0000785|GO:0000981|GO:0000077|GO:0005634|GO:0005515|GO:0010628|GO:0072332|GO:0048255|GO:0032991|GO:2000045|GO:0035189|GO:0043565|GO:0045944|GO:0005654|GO:0000122|GO:…	cell communication|negative regulation of cell cycle|signal transduction in response to DNA damage|regulation of cell cycle phase transition|negative regulation of biological process|negative regulation of cell cycle phase transition|regulation of cellular process|cellular response to stress|regulation of cell cycle|response to stimulus|intracellular signal transduction|biological regulation|biol…
Hnf4a	RGD:2810	hepatocyte nuclear factor 4, alpha	RNA polymerase II cis-regulatory region sequence-specific DNA binding|signal transduction involved in regulation of gene expression|transcription cis-regulatory region binding|transcription by RNA polymerase II|DNA-binding transcription activator activity, RNA polymerase II-specific|negative regulation of tyrosine phosphorylation of STAT protein|positive regulation of gluconeogenesis|phospholipid…	GO:0000978|GO:0023019|GO:0000976|GO:0006366|GO:0001228|GO:0042532|GO:0045722|GO:0055091|GO:0044877|GO:0045723|GO:0006637|GO:0050796|GO:0009749|GO:0016290|GO:0005504|GO:0045892|GO:0000062|GO:0030308|GO:0045893|GO:0070365|GO:0071456|GO:0070328|GO:0010470|GO:0008270|GO:0019904|GO:0042308|GO:0036042|GO:0060395|GO:0000987|GO:0045930|GO:0043433|GO:0045216|GO:1902569|GO:0000981|GO:0005634|GO:0005515|GO:…	heterocyclic compound binding|sulfur compound binding|acyl-CoA binding|nucleoside phosphate binding|ion binding|small molecule binding|lipid binding|fatty acid derivative binding|anion binding|binding|molecular_function|nucleotide binding|adenyl ribonucleotide binding|organic cyclic compound binding|fatty-acyl-CoA binding|carbohydrate derivative binding|purine nucleotide binding|ribonucleotide bi…
Creb3l4	RGD:1359278	cAMP responsive element binding protein 3-like 4	biological_process|spermatogenesis|RNA polymerase II cis-regulatory region sequence-specific DNA binding|RNA polymerase II transcription regulatory region sequence-specific DNA binding|DNA-binding transcription activator activity, RNA polymerase II-specific|endoplasmic reticulum|Golgi apparatus|positive regulation of transcription by RNA polymerase II|response to unfolded protein|nucleoplasm|regu…	GO:0008150|GO:0007283|GO:0000978|GO:0000977|GO:0001228|GO:0005783|GO:0005794|GO:0045944|GO:0006986|GO:0005654|GO:0006357|GO:0000981|GO:0005789|GO:0003677|GO:0005634|GO:0031965|GO:0005739|GO:1990837	nucleic acid binding|DNA binding|transcription regulatory region nucleic acid binding|organic cyclic compound binding|heterocyclic compound binding|RNA polymerase II transcription regulatory region sequence-specific DNA binding|double-stranded DNA binding|transcription cis-regulatory region binding|sequence-specific DNA binding|sequence-specific double-stranded DNA binding|binding|molecular_funct…
Cecr2	RGD:1564182	CECR2, histone acetyl-lysine reader	neural tube development|inner ear receptor cell stereocilium organization|cochlea development|ISWI-type complex|single fertilization|execution phase of apoptosis|nucleus|euchromatin|chromatin remodeling|neural fold formation|neural tube closure|ATP-dependent chromatin remodeler activity|CERF complex	GO:0021915|GO:0060122|GO:0090102|GO:0031010|GO:0007338|GO:0097194|GO:0005634|GO:0000791|GO:0006338|GO:0001842|GO:0001843|GO:0140658|GO:0090537	intracellular organelle|cell|biological entity|protein-containing material entity|intracellular non-membrane-bounded organelle|chromosome|cellular anatomical entity|organelle|cellular_component|chromatin|intracellular anatomical structure|non-membrane-bounded organelle|anatomical structure|anatomical entity|material anatomical entity|euchromatin|connected anatomical structure|protein-DNA complex|…
Tead4	RGD:1585671	TEA domain transcription factor 4	DNA-templated transcription|RNA polymerase II cis-regulatory region sequence-specific DNA binding|DNA-binding transcription activator activity, RNA polymerase II-specific|sequence-specific DNA binding|embryonic organ development|positive regulation of transcription by RNA polymerase II|embryo implantation|positive regulation of stem cell population maintenance|nucleoplasm|regulation of transcript…	GO:0006351|GO:0000978|GO:0001228|GO:0043565|GO:0048568|GO:0045944|GO:0007566|GO:1902459|GO:0005654|GO:0006357|GO:0000981|GO:0003677|GO:0005634|GO:0005667|GO:0001830|GO:0003700|GO:0001701|GO:0005737|GO:0045893|GO:0045165|GO:0001825|GO:0032993|GO:0035329|GO:0001708	heterocyclic compound binding|RNA polymerase II cis-regulatory region sequence-specific DNA binding|RNA polymerase II transcription regulatory region sequence-specific DNA binding|double-stranded DNA binding|cis-regulatory region sequence-specific DNA binding|transcription cis-regulatory region binding|sequence-specific DNA binding|binding|molecular_function|nucleic acid binding|transcription reg…
Tbxt	RGD:1310141	T-box transcription factor T	cell population proliferation|determination of heart left/right asymmetry|RNA polymerase II cis-regulatory region sequence-specific DNA binding|positive regulation of cell population proliferation|mesoderm development|anterior/posterior pattern specification|signal transduction involved in regulation of gene expression|bone morphogenesis|transcription by RNA polymerase II|anatomical structure mor…	GO:0008283|GO:0061371|GO:0000978|GO:0008284|GO:0007498|GO:0009952|GO:0023019|GO:0060349|GO:0006366|GO:0009653|GO:0043565|GO:0001570|GO:0045944|GO:0005654|GO:0000122|GO:0003007|GO:0001843|GO:0030903|GO:0007509|GO:0001707|GO:0001708|GO:0036342|GO:0007341|GO:0060395|GO:0022414|GO:0043433|GO:0048706|GO:0000785|GO:0060379|GO:0000981|GO:0006357|GO:0005634|GO:0061629|GO:0001756|GO:0005737|GO:0071300|GO:…	regulation of nucleobase-containing compound metabolic process|negative regulation of metabolic process|negative regulation of biosynthetic process|negative regulation of nitrogen compound metabolic process|regulation of nitrogen compound metabolic process|negative regulation of biological process|regulation of nucleic acid-templated transcription|negative regulation of nucleic acid-templated tra…
Gata1	RGD:2663	GATA binding protein 1	positive regulation of mast cell degranulation|male gonad development|embryonic hemopoiesis|RNA polymerase II cis-regulatory region sequence-specific DNA binding|RNA polymerase II transcription regulatory region sequence-specific DNA binding|transcription cis-regulatory region binding|transcription by RNA polymerase II|DNA binding, bending|Sertoli cell development|DNA-binding transcription activa…	GO:0043306|GO:0008584|GO:0035162|GO:0000978|GO:0000977|GO:0000976|GO:0006366|GO:0008301|GO:0060009|GO:0001228|GO:0045648|GO:0001223|GO:0071372|GO:0005667|GO:0030502|GO:0002039|GO:0001701|GO:0045893|GO:0030220|GO:0030222|GO:0030221|GO:2000678|GO:0070527|GO:0033690|GO:0008270|GO:0007267|GO:0000987|GO:0060319|GO:0000981|GO:0005634|GO:0030219|GO:0030218|GO:0017053|GO:0071320|GO:0030099|GO:0032993|GO:…	regulation of nucleobase-containing compound metabolic process|negative regulation of metabolic process|negative regulation of biosynthetic process|negative regulation of nitrogen compound metabolic process|regulation of nitrogen compound metabolic process|negative regulation of biological process|regulation of nucleic acid-templated transcription|negative regulation of nucleic acid-templated tra…
Rfx2	RGD:1588579	regulatory factor X2	cilium assembly|spermatid development|RNA polymerase II cis-regulatory region sequence-specific DNA binding|RNA polymerase II transcription regulatory region sequence-specific DNA binding|DNA-binding transcription activator activity, RNA polymerase II-specific|positive regulation of transcription by RNA polymerase II|regulation of transcription by RNA polymerase II|DNA-binding transcription facto…	GO:0060271|GO:0007286|GO:0000978|GO:0000977|GO:0001228|GO:0045944|GO:0006357|GO:0000981|GO:0001675|GO:0005634|GO:0003700|GO:1990830|GO:0005737|GO:1990837	nucleic acid binding|DNA binding|transcription regulatory region nucleic acid binding|organic cyclic compound binding|heterocyclic compound binding|RNA polymerase II transcription regulatory region sequence-specific DNA binding|double-stranded DNA binding|transcription cis-regulatory region binding|sequence-specific DNA binding|sequence-specific double-stranded DNA binding|binding|molecular_funct…
Ctnnb1	RGD:70487	catenin beta 1	lung-associated mesenchyme development|negative regulation of angiogenesis|lung epithelial cell differentiation|midgut development|Scrib-APC-beta-catenin complex|RNA polymerase II transcription regulator complex|protein localization|synaptic vesicle clustering|hair cycle process|positive regulation of DNA-binding transcription factor activity|skin development|regulation of timing of anagen|tight …	GO:0060484|GO:0016525|GO:0060487|GO:0007494|GO:0034750|GO:0090575|GO:0008104|GO:0097091|GO:0022405|GO:0051091|GO:0043588|GO:0051884|GO:0070160|GO:0045892|GO:0048489|GO:0001701|GO:0001822|GO:0045893|GO:0001702|GO:0001944|GO:1990403|GO:0001706|GO:0098978|GO:0001708|GO:0030027|GO:0070602|GO:0019901|GO:0019903|GO:0007268|GO:0003340|GO:0061324|GO:0044325|GO:0005886|GO:0060479|GO:0005634|GO:0030018|GO:…	regulation of nucleobase-containing compound metabolic process|negative regulation of metabolic process|negative regulation of biosynthetic process|negative regulation of nitrogen compound metabolic process|regulation of nitrogen compound metabolic process|negative regulation of biological process|regulation of nucleic acid-templated transcription|negative regulation of nucleic acid-templated tra…
Smad4	RGD:3033	SMAD family member 4	male gonad development|RNA polymerase II transcription regulator complex|endoderm development|RNA polymerase II cis-regulatory region sequence-specific DNA binding|RNA polymerase II transcription regulatory region sequence-specific DNA binding|mesoderm development|anterior/posterior pattern specification|transcription cis-regulatory region binding|axon guidance|negative regulation of cardiac myof…	GO:0008584|GO:0090575|GO:0007492|GO:0000978|GO:0000977|GO:0007498|GO:0009952|GO:0000976|GO:0007411|GO:1905305|GO:0008585|GO:0001666|GO:0045892|GO:0001701|GO:0001822|GO:0030308|GO:0045893|GO:0001702|GO:0032444|GO:0035556|GO:0043199|GO:0003220|GO:0000981|GO:0005634|GO:0005515|GO:0005518|GO:0046872|GO:0051098|GO:0010666|GO:0001837|GO:0008283|GO:0008285|GO:0060548|GO:0009653|GO:0045944|GO:0003279|GO:…	regulation of nucleobase-containing compound metabolic process|negative regulation of metabolic process|negative regulation of biosynthetic process|negative regulation of nitrogen compound metabolic process|regulation of nitrogen compound metabolic process|negative regulation of biological process|regulation of nucleic acid-templated transcription|negative regulation of nucleic acid-templated tra…
Tbp	RGD:67398	TATA box binding protein	transcription by RNA polymerase III|positive regulation of transcription initiation by RNA polymerase II|RNA polymerase II core promoter sequence-specific DNA binding|RNA polymerase II cis-regulatory region sequence-specific DNA binding|transcription cis-regulatory region binding|transcription by RNA polymerase II|transcription factor TFIIA complex|RNA polymerase III general transcription initiat…	GO:0006383|GO:0060261|GO:0000979|GO:0000978|GO:0000976|GO:0006366|GO:0005672|GO:0000995|GO:0006468|GO:0001673|GO:0005654|GO:0005668|GO:0001940|GO:0051123|GO:0005669|GO:0017162|GO:0045893|GO:0016251|GO:0001093|GO:0001091|GO:0140297|GO:0042789|GO:0007283|GO:0006352|GO:0000785|GO:0001046|GO:0001674|GO:0003677|GO:0005634|GO:0097550|GO:0000791|GO:0005515|GO:0061629|GO:0005737|GO:0045120|GO:0140223|GO:…	intracellular organelle|cell|biological entity|protein-containing material entity|intracellular non-membrane-bounded organelle|chromosome|cellular anatomical entity|organelle|chromatin|cellular_component|intracellular anatomical structure|non-membrane-bounded organelle|anatomical structure|anatomical entity|material anatomical entity|connected anatomical structure|protein-DNA complex|protein-cont…
Tbx3	RGD:735203	T-box transcription factor 3	atrioventricular canal morphogenesis|RNA polymerase II cis-regulatory region sequence-specific DNA binding|DNA-binding transcription activator activity, RNA polymerase II-specific|cardiac muscle cell fate commitment|DNA-binding transcription repressor activity, RNA polymerase II-specific|branching involved in mammary gland duct morphogenesis|hepatoblast differentiation|embryonic digit morphogenes…	GO:1905222|GO:0000978|GO:0001228|GO:0060923|GO:0001227|GO:0060444|GO:0061017|GO:0042733|GO:0005667|GO:0003007|GO:0001501|GO:0045892|GO:0001701|GO:0045893|GO:0001947|GO:0072105|GO:0030540|GO:0001708|GO:0035115|GO:0055007|GO:0035116|GO:0019827|GO:0060596|GO:0008595|GO:0060317|GO:0009887|GO:0000981|GO:0005634|GO:0030857|GO:0030539|GO:0045662|GO:2000648|GO:0042472|GO:0048332|GO:0035108|GO:1905072|GO:…	regulation of nucleobase-containing compound metabolic process|negative regulation of metabolic process|negative regulation of biosynthetic process|negative regulation of nitrogen compound metabolic process|regulation of nitrogen compound metabolic process|negative regulation of biological process|regulation of nucleic acid-templated transcription|negative regulation of nucleic acid-templated tra…
Tcf7	RGD:1305894	transcription factor 7	neural tube development|nuclear body|embryonic hindgut morphogenesis|RNA polymerase II cis-regulatory region sequence-specific DNA binding|transcription cis-regulatory region binding|regulation of gamma-delta T cell differentiation|embryonic digestive tract morphogenesis|DNA-binding transcription repressor activity, RNA polymerase II-specific|alpha-beta T cell differentiation|canonical Wnt signal…	GO:0021915|GO:0016604|GO:0048619|GO:0000978|GO:0000976|GO:0045586|GO:0048557|GO:0001227|GO:0046632|GO:0044336|GO:0005654|GO:0000122|GO:0003700|GO:0071353|GO:0060070|GO:1990907|GO:0008150|GO:0033153|GO:0006355|GO:0001217|GO:0008013|GO:0042127|GO:0006357|GO:0000981|GO:0003677|GO:0005634|GO:0000791|GO:0030538|GO:0042492|GO:1990837	regulation of nucleobase-containing compound metabolic process|negative regulation of metabolic process|negative regulation of biosynthetic process|negative regulation of nitrogen compound metabolic process|regulation of nitrogen compound metabolic process|negative regulation of biological process|regulation of nucleic acid-templated transcription|negative regulation of nucleic acid-templated tra…
Vdr	RGD:3959	vitamin D receptor	RNA polymerase II transcription regulator complex|RNA polymerase II cis-regulatory region sequence-specific DNA binding|small molecule binding|decidualization|caveola|skeletal system development|negative regulation of DNA-templated transcription|vitamin D receptor signaling pathway|cytosol|vitamin D response element binding|positive regulation of parathyroid hormone secretion|positive regulation …	GO:0090575|GO:0000978|GO:0036094|GO:0046697|GO:0005901|GO:0001501|GO:0045892|GO:0070561|GO:0005829|GO:0070644|GO:2000830|GO:0070564|GO:0051924|GO:0035435|GO:0042789|GO:0045618|GO:0008270|GO:0038186|GO:0000902|GO:1902121|GO:0038183|GO:0060558|GO:0043235|GO:1903412|GO:0009887|GO:0000792|GO:0005634|GO:0000791|GO:0005515|GO:0010628|GO:0032355|GO:0016363|GO:0010980|GO:1902098|GO:0007275|GO:0008285|GO:…	regulation of nucleobase-containing compound metabolic process|negative regulation of metabolic process|negative regulation of biosynthetic process|negative regulation of nitrogen compound metabolic process|regulation of nitrogen compound metabolic process|negative regulation of biological process|regulation of nucleic acid-templated transcription|negative regulation of nucleic acid-templated tra…
Smarce1	RGD:1304726	SWI/SNF related, matrix associated, actin dependent regulator of chromatin, subfamily e, member 1	SWI/SNF complex|nuclear receptor binding|spermatid development|neurogenesis|nucleosome disassembly|nucleoplasm|DNA binding|nucleus|chromatin remodeling|RNA binding|protein binding|negative regulation of DNA-templated transcription|npBAF complex|nBAF complex|N-acetyltransferase activity	GO:0016514|GO:0016922|GO:0007286|GO:0022008|GO:0006337|GO:0005654|GO:0003677|GO:0005634|GO:0006338|GO:0003723|GO:0005515|GO:0045892|GO:0071564|GO:0071565|GO:0008080	nucleic acid binding|DNA binding|organic cyclic compound binding|heterocyclic compound binding|binding|molecular_function|RNA binding|protein binding|intracellular organelle|cell|biological entity|cellular anatomical entity|organelle|cellular_component|intracellular anatomical structure|membrane-bounded organelle|anatomical structure|anatomical entity|material anatomical entity|nucleus|connected …
Hsf1	RGD:620913	heat shock transcription factor 1	RNA polymerase II cis-regulatory region sequence-specific DNA binding|transcription cis-regulatory region binding|positive regulation of tyrosine phosphorylation of STAT protein|positive regulation of DNA-binding transcription factor activity|protein self-association|epithelial cell proliferation|in utero embryonic development|positive regulation of macrophage differentiation|protein heterodimeri…	GO:0000978|GO:0000976|GO:0042531|GO:0051091|GO:0043621|GO:0050673|GO:0001701|GO:0045651|GO:0046982|GO:0034620|GO:0032720|GO:0019901|GO:0031072|GO:0065003|GO:0007143|GO:0014070|GO:1903936|GO:0045931|GO:0000981|GO:0005634|GO:0071480|GO:0001162|GO:0050680|GO:0010667|GO:0072738|GO:0071407|GO:0008283|GO:1900034|GO:0008284|GO:0045944|GO:0071280|GO:0001892|GO:0040018|GO:0000165|GO:0009408|GO:0071392|GO:…	regulation of nucleobase-containing compound metabolic process|negative regulation of metabolic process|negative regulation of biosynthetic process|negative regulation of nitrogen compound metabolic process|regulation of nitrogen compound metabolic process|negative regulation of biological process|regulation of nucleic acid-templated transcription|negative regulation of nucleic acid-templated tra…
Myc	RGD:3130	MYC proto-oncogene, bHLH transcription factor	regulation of oxidative phosphorylation|positive regulation of ATP biosynthetic process|RNA polymerase II cis-regulatory region sequence-specific DNA binding|double-stranded DNA binding|response to radiation|RNA polymerase II transcription repressor complex|positive regulation of acinar cell proliferation|in utero embryonic development|positive regulation of DNA-templated transcription|pigmentati…	GO:0002082|GO:2001171|GO:0000978|GO:0003690|GO:0009314|GO:0090571|GO:1904699|GO:0001701|GO:0045893|GO:0043473|GO:1990646|GO:0003729|GO:0071378|GO:0050679|GO:0030424|GO:0032204|GO:0071409|GO:1904620|GO:0036120|GO:1904586|GO:0000987|GO:0008630|GO:0046983|GO:0006974|GO:1904628|GO:0045656|GO:0000981|GO:0001046|GO:0005635|GO:0005634|GO:0005515|GO:0031625|GO:0045023|GO:0043085|GO:0006848|GO:0071364|GO:…	biological_process|mitotic cell cycle process|G1/S transition of mitotic cell cycle|cell cycle phase transition|cell cycle process|mitotic cell cycle phase transition|cell cycle G1/S phase transition|cellular process|cell cycle|mitotic cell cycle|regulation of nucleobase-containing compound metabolic process|negative regulation of metabolic process|negative regulation of biosynthetic process|nega…
Rat orthologs with GO involved in reproduction (Proximal germline)
Gene name	Primary source	Gene product name	Direct annotation	GO_term	Involved in
Junb	RGD:2944	JunB proto-oncogene, AP-1 transcription factor subunit	response to cytokine|RNA polymerase II transcription regulator complex|RNA polymerase II cis-regulatory region sequence-specific DNA binding|response to progesterone|RNA polymerase II transcription regulatory region sequence-specific DNA binding|double-stranded DNA binding|transcription by RNA polymerase II|response to cAMP|DNA-binding transcription activator activity, RNA polymerase II-specific|…	GO:0034097|GO:0090575|GO:0000978|GO:0032570|GO:0000977|GO:0003690|GO:0006366|GO:0051591|GO:0001228|GO:0043565|GO:0046697|GO:0001570|GO:0009410|GO:0045944|GO:0009416|GO:0005654|GO:0009612|GO:0002158|GO:0005667|GO:0003700|GO:0071277|GO:0001701|GO:0001649|GO:0035976|GO:0051726|GO:0071456|GO:0001829|GO:0072724|GO:0006355|GO:0007565|GO:0045597|GO:0014070|GO:0008134|GO:0060136|GO:0043434|GO:0042127|GO:…	nucleic acid binding|DNA binding|transcription regulatory region nucleic acid binding|organic cyclic compound binding|heterocyclic compound binding|RNA polymerase II transcription regulatory region sequence-specific DNA binding|double-stranded DNA binding|transcription cis-regulatory region binding|sequence-specific DNA binding|sequence-specific double-stranded DNA binding|binding|molecular_funct…
Hnf4a	RGD:2810	hepatocyte nuclear factor 4, alpha	RNA polymerase II cis-regulatory region sequence-specific DNA binding|signal transduction involved in regulation of gene expression|transcription cis-regulatory region binding|transcription by RNA polymerase II|DNA-binding transcription activator activity, RNA polymerase II-specific|negative regulation of tyrosine phosphorylation of STAT protein|positive regulation of gluconeogenesis|phospholipid…	GO:0000978|GO:0023019|GO:0000976|GO:0006366|GO:0001228|GO:0042532|GO:0045722|GO:0055091|GO:0044877|GO:0045723|GO:0006637|GO:0050796|GO:0009749|GO:0016290|GO:0005504|GO:0045892|GO:0000062|GO:0030308|GO:0045893|GO:0070365|GO:0071456|GO:0070328|GO:0010470|GO:0008270|GO:0019904|GO:0042308|GO:0036042|GO:0060395|GO:0000987|GO:0045930|GO:0043433|GO:0045216|GO:1902569|GO:0000981|GO:0005634|GO:0005515|GO:…	heterocyclic compound binding|sulfur compound binding|acyl-CoA binding|nucleoside phosphate binding|ion binding|small molecule binding|lipid binding|fatty acid derivative binding|anion binding|binding|molecular_function|nucleotide binding|adenyl ribonucleotide binding|organic cyclic compound binding|fatty-acyl-CoA binding|carbohydrate derivative binding|purine nucleotide binding|ribonucleotide bi…
Egr1	RGD:2544	early growth response 1	double-stranded methylated DNA binding|RNA polymerase II core promoter sequence-specific DNA binding|circadian temperature homeostasis|RNA polymerase II cis-regulatory region sequence-specific DNA binding|RNA polymerase II transcription regulatory region sequence-specific DNA binding|double-stranded DNA binding|transcription cis-regulatory region binding|DNA-binding transcription activator activi…	GO:0010385|GO:0000979|GO:0060086|GO:0000978|GO:0000977|GO:0003690|GO:0000976|GO:0001228|GO:0061418|GO:0007611|GO:0071372|GO:1902949|GO:0009749|GO:0032922|GO:0001666|GO:0071371|GO:0035914|GO:1990841|GO:0045893|GO:0048169|GO:0030509|GO:0060291|GO:0071455|GO:0072303|GO:0034465|GO:0071456|GO:0032722|GO:0051602|GO:0008270|GO:0035035|GO:0044849|GO:0044729|GO:0042220|GO:0042981|GO:1901875|GO:0007623|GO:…	regulation of nucleobase-containing compound metabolic process|negative regulation of metabolic process|negative regulation of biosynthetic process|negative regulation of nitrogen compound metabolic process|regulation of nitrogen compound metabolic process|negative regulation of biological process|regulation of nucleic acid-templated transcription|negative regulation of nucleic acid-templated tra…
Tesmin	RGD:1309788	testis expressed metallothionein like protein	nucleus|biological_process|cytoplasm|male meiotic nuclear division|spermatogenesis|cell differentiation|regulation of DNA-templated transcription|male germ cell nucleus	GO:0005634|GO:0008150|GO:0005737|GO:0007140|GO:0007283|GO:0030154|GO:0006355|GO:0001673	intracellular organelle|cell|biological entity|cellular anatomical entity|organelle|cellular_component|intracellular anatomical structure|male germ cell nucleus|anatomical structure|membrane-bounded organelle|anatomical entity|material anatomical entity|nucleus|germ cell nucleus|connected anatomical structure|intracellular membrane-bounded organelle|germ line cell|native cell|germ cell|male germ …
Dmrt1	RGD:621640	doublesex and mab-3 related transcription factor 1	male gonad development|positive regulation of male gonad development|RNA polymerase II cis-regulatory region sequence-specific DNA binding|RNA polymerase II transcription regulatory region sequence-specific DNA binding|Sertoli cell differentiation|Sertoli cell development|DNA-binding transcription activator activity, RNA polymerase II-specific|sequence-specific DNA binding|positive regulation of …	GO:0008584|GO:2000020|GO:0000978|GO:0000977|GO:0060008|GO:0060009|GO:0001228|GO:0043565|GO:0045840|GO:0045944|GO:0000122|GO:0003006|GO:0007548|GO:0060903|GO:0046661|GO:0035556|GO:0042802|GO:0000902|GO:0007283|GO:0000987|GO:0003682|GO:0008354|GO:0002176|GO:0045835|GO:0007127|GO:1900107|GO:0006357|GO:0000981|GO:0001674|GO:0005634|GO:0030238|GO:0048599|GO:0005737|GO:0046872|GO:1990837	regulation of nucleobase-containing compound metabolic process|negative regulation of metabolic process|negative regulation of biosynthetic process|negative regulation of nitrogen compound metabolic process|regulation of nitrogen compound metabolic process|negative regulation of biological process|regulation of nucleic acid-templated transcription|negative regulation of nucleic acid-templated tra…
Arid1a	RGD:1310500	AT-rich interaction domain 1A	nuclear receptor binding|brahma complex|chromatin organization|nucleoplasm|negative regulation of transcription by RNA polymerase II|cardiac chamber development|chromatin remodeling|forebrain development|neural tube closure|positive regulation of DNA-templated transcription|ATP-dependent chromatin remodeler activity|optic cup formation involved in camera-type eye development|formation of primary …	GO:0016922|GO:0035060|GO:0006325|GO:0005654|GO:0000122|GO:0003205|GO:0006338|GO:0030900|GO:0001843|GO:0045893|GO:0140658|GO:0003408|GO:0001704|GO:0030521|GO:0030520|GO:0055007|GO:0042921|GO:0008150|GO:0016514|GO:0019827|GO:0060674|GO:0031491|GO:0000785|GO:0006337|GO:0007566|GO:0007369|GO:0006357|GO:0003677|GO:0071564|GO:0071565	regulation of nucleobase-containing compound metabolic process|negative regulation of metabolic process|negative regulation of biosynthetic process|negative regulation of nitrogen compound metabolic process|regulation of nitrogen compound metabolic process|negative regulation of biological process|regulation of nucleic acid-templated transcription|negative regulation of nucleic acid-templated tra…
Tut7	RGD:1586015	terminal uridylyl transferase 7	miRNA binding|biological_process|zinc ion binding|pre-miRNA processing|polyuridylation-dependent mRNA catabolic process|nucleoplasm|RNA uridylyltransferase activity|RNA 3' uridylation|oocyte maturation|cytoplasm|retrotransposon silencing|retrotransposon silencing by mRNA destabilization|RNA 3'-end processing|cytosol|miRNA metabolic process|uridylyltransferase activity	GO:0035198|GO:0008150|GO:0008270|GO:0031054|GO:1990074|GO:0005654|GO:0050265|GO:0071076|GO:0001556|GO:0005737|GO:0010526|GO:0141008|GO:0031123|GO:0005829|GO:0010586|GO:0070569	female gamete generation|anatomical structure development|oocyte differentiation|gamete generation|developmental process involved in reproduction|multicellular organism reproduction|anatomical structure maturation|developmental process|multicellular organismal process|germ cell development|biological_process|multicellular organismal reproductive process|reproductive process|developmental maturati…
Smarcc1	RGD:1304850	SWI/SNF related, matrix associated, actin dependent regulator of chromatin, subfamily c, member 1	SWI/SNF complex|insulin receptor signaling pathway|chromatin binding|positive regulation of transcription by RNA polymerase II|nucleosome disassembly|male germ cell nucleus|nucleoplasm|animal organ morphogenesis|XY body|nucleus|chromatin remodeling|cytoplasm|positive regulation of DNA-templated transcription|npBAF complex|histone binding|nBAF complex|prostate gland development|negative regulation…	GO:0016514|GO:0008286|GO:0003682|GO:0045944|GO:0006337|GO:0001673|GO:0005654|GO:0009887|GO:0001741|GO:0005634|GO:0006338|GO:0005737|GO:0045893|GO:0071564|GO:0042393|GO:0071565|GO:0030850|GO:0032435	intracellular organelle|cell|biological entity|cellular anatomical entity|organelle|cellular_component|intracellular anatomical structure|male germ cell nucleus|anatomical structure|membrane-bounded organelle|anatomical entity|material anatomical entity|nucleus|germ cell nucleus|connected anatomical structure|intracellular membrane-bounded organelle|germ line cell|native cell|germ cell|male germ …

## Sheet: GO - reproduction in human
Human orthologs with GO involved in reproduction (Distal germline)
Gene name	Primary source	Gene product name	Direct annotation	GO_term	Involved in
HSF2	UniProtKB:Q03933	Heat shock factor protein 2	identical protein binding|spermatogenesis|RNA polymerase II cis-regulatory region sequence-specific DNA binding|RNA polymerase II transcription regulatory region sequence-specific DNA binding|DNA-binding transcription activator activity, RNA polymerase II-specific|positive regulation of transcription by RNA polymerase II|chromatin|DNA-binding transcription factor activity, RNA polymerase II-speci…	GO:0042802|GO:0007283|GO:0000978|GO:0000977|GO:0001228|GO:0045944|GO:0000785|GO:0000981|GO:0005654|GO:0006357|GO:0005634|GO:0003700|GO:0005515|GO:0001162|GO:0005737|GO:1990837	regulation of nucleobase-containing compound metabolic process|positive regulation of metabolic process|positive regulation of biosynthetic process|positive regulation of nitrogen compound metabolic process|regulation of nitrogen compound metabolic process|positive regulation of transcription by RNA polymerase II|regulation of nucleic acid-templated transcription|positive regulation of biological…
EOMES	UniProtKB:O95936	Eomesodermin homolog	DNA demethylation|RNA polymerase II cis-regulatory region sequence-specific DNA binding|sequence-specific DNA binding|positive regulation of transcription by RNA polymerase II|olfactory bulb development|cerebral cortex regionalization|cerebral cortex neuron differentiation|negative regulation of transcription by RNA polymerase II|mesodermal to mesenchymal transition involved in gastrulation|neuro…	GO:0080111|GO:0000978|GO:0043565|GO:0045944|GO:0021772|GO:0021796|GO:0021895|GO:0000122|GO:0060809|GO:0001764|GO:0006338|GO:0035914|GO:0045893|GO:0060706|GO:0001706|GO:0001707|GO:0001829|GO:0031490|GO:0019827|GO:0048708|GO:0002250|GO:0043433|GO:0007420|GO:0000785|GO:0006357|GO:0000981|GO:0003677|GO:0002302|GO:0005634|GO:0006306|GO:0061629|GO:0001714|GO:0010467|GO:1990837|GO:0010002	regulation of nucleobase-containing compound metabolic process|positive regulation of metabolic process|positive regulation of biosynthetic process|positive regulation of nitrogen compound metabolic process|regulation of nitrogen compound metabolic process|positive regulation of transcription by RNA polymerase II|regulation of nucleic acid-templated transcription|positive regulation of biological…
MYBL1	UniProtKB:P10243	Myb-related protein A	spermatogenesis|RNA polymerase II cis-regulatory region sequence-specific DNA binding|male meiosis I|DNA-binding transcription activator activity, RNA polymerase II-specific|positive regulation of transcription by RNA polymerase II|mitotic cell cycle|nucleoplasm|DNA-binding transcription factor activity, RNA polymerase II-specific|nucleus|positive regulation of DNA-templated transcription|negativ…	GO:0007283|GO:0000978|GO:0007141|GO:0001228|GO:0045944|GO:0000278|GO:0005654|GO:0000981|GO:0005634|GO:0045893|GO:0010529|GO:0030154|GO:0140543	heterocyclic compound binding|RNA polymerase II cis-regulatory region sequence-specific DNA binding|RNA polymerase II transcription regulatory region sequence-specific DNA binding|double-stranded DNA binding|cis-regulatory region sequence-specific DNA binding|transcription cis-regulatory region binding|sequence-specific DNA binding|binding|molecular_function|nucleic acid binding|transcription reg…
PPARD	UniProtKB:Q03181	Peroxisome proliferator-activated receptor delta	positive regulation of phosphatidylinositol 3-kinase signaling|phosphatidylinositol 3-kinase signaling|RNA polymerase II cis-regulatory region sequence-specific DNA binding|positive regulation of fat cell differentiation|decidualization|DNA-binding transcription repressor activity, RNA polymerase II-specific|glucose metabolic process|transcription coactivator binding|glucose transmembrane transpo…	GO:0014068|GO:0014065|GO:0000978|GO:0045600|GO:0046697|GO:0001227|GO:0006006|GO:0001223|GO:1904659|GO:0009755|GO:0006635|GO:0009749|GO:0032966|GO:0042060|GO:0015908|GO:0045892|GO:0030308|GO:0045893|GO:0006915|GO:0097009|GO:2000277|GO:0071456|GO:0008270|GO:0006091|GO:0050728|GO:0006776|GO:0000785|GO:0000981|GO:0051059|GO:0005634|GO:0005515|GO:0031669|GO:0045662|GO:0010628|GO:0050680|GO:2000288|GO:…	regulation of nitrogen compound metabolic process|primary metabolic process|cellular metabolic process|regulation of cellular process|transcription regulator activity|nucleic acid metabolic process|biological regulation|regulation of RNA biosynthetic process|biological_process|metabolic process|cellular biosynthetic process|regulation of biosynthetic process|nucleobase-containing compound metabol…
GATA1	UniProtKB:P15976	Erythroid transcription factor	positive regulation of mast cell degranulation|male gonad development|RNA polymerase II cis-regulatory region sequence-specific DNA binding|RNA polymerase II transcription regulatory region sequence-specific DNA binding|transcription cis-regulatory region binding|transcription by RNA polymerase II|Sertoli cell development|DNA-binding transcription activator activity, RNA polymerase II-specific|po…	GO:0043306|GO:0008584|GO:0000978|GO:0000977|GO:0000976|GO:0006366|GO:0060009|GO:0001228|GO:0045648|GO:0001223|GO:0071372|GO:0030502|GO:0005667|GO:0002039|GO:0001701|GO:0045893|GO:0030220|GO:0030222|GO:0030221|GO:2000678|GO:0070527|GO:0033690|GO:0008270|GO:0007267|GO:0060319|GO:0000785|GO:0000981|GO:0005634|GO:0030219|GO:0005515|GO:0030218|GO:0017053|GO:0071320|GO:0033687|GO:0032993|GO:0031100|GO:…	nucleic acid binding|DNA binding|transcription regulatory region nucleic acid binding|organic cyclic compound binding|heterocyclic compound binding|double-stranded DNA binding|transcription cis-regulatory region binding|sequence-specific DNA binding|sequence-specific double-stranded DNA binding|binding|molecular_function|RNA polymerase II transcription regulatory region sequence-specific DNA bind…
E2F1	UniProtKB:Q01094	Transcription factor E2F1	RNA polymerase II transcription regulator complex|cellular response to nerve growth factor stimulus|RNA polymerase II cis-regulatory region sequence-specific DNA binding|negative regulation of DNA binding|forebrain development|negative regulation of DNA-templated transcription|positive regulation of DNA-templated transcription|negative regulation of transcription involved in G1/S transition of mi…	GO:0090575|GO:1990090|GO:0000978|GO:0043392|GO:0030900|GO:0045892|GO:0045893|GO:0071930|GO:0071456|GO:0060090|GO:0019901|GO:0000987|GO:0043276|GO:0000228|GO:0046983|GO:0008630|GO:0043433|GO:0000785|GO:0000981|GO:0000077|GO:0005634|GO:0005515|GO:0010628|GO:0072332|GO:0048255|GO:2000045|GO:0032991|GO:0035189|GO:0043565|GO:0045944|GO:0005654|GO:0000122|GO:0003700|GO:0071398|GO:0000083|GO:0048146|GO:…	regulation of nitrogen compound metabolic process|primary metabolic process|cellular metabolic process|regulation of cellular process|transcription regulator activity|nucleic acid metabolic process|biological regulation|regulation of RNA biosynthetic process|biological_process|metabolic process|cellular biosynthetic process|regulation of biosynthetic process|nucleobase-containing compound metabol…
SMAD4	UniProtKB:Q13485	Mothers against decapentaplegic homolog 4	endoderm development|RNA polymerase II cis-regulatory region sequence-specific DNA binding|mesoderm development|transcription cis-regulatory region binding|axon guidance|negative regulation of cardiac myofibril assembly|response to hypoxia|negative regulation of DNA-templated transcription|in utero embryonic development|negative regulation of cell growth|positive regulation of DNA-templated trans…	GO:0007492|GO:0000978|GO:0007498|GO:0000976|GO:0007411|GO:1905305|GO:0001666|GO:0045892|GO:0001701|GO:0030308|GO:0045893|GO:0071773|GO:0001702|GO:0032444|GO:0035556|GO:0043199|GO:0003220|GO:0000981|GO:0005634|GO:0005515|GO:0005518|GO:0046872|GO:0051098|GO:0010666|GO:0001837|GO:0008283|GO:0008285|GO:0009653|GO:1901522|GO:0045944|GO:0003148|GO:0003700|GO:0072520|GO:0048663|GO:0046881|GO:0001649|GO:…	nucleic acid binding|DNA binding|organic cyclic compound binding|heterocyclic compound binding|binding|molecular_function|regulation of nucleobase-containing compound metabolic process|organic cyclic compound metabolic process|organic cyclic compound biosynthetic process|macromolecule biosynthetic process|biosynthetic process|regulation of nitrogen compound metabolic process|regulation of nucleic…
ZFP42	UniProtKB:Q96MM3	Zinc finger protein 42 homolog	male gonad development|RNA polymerase II cis-regulatory region sequence-specific DNA binding|female gonad development|regulation of transcription by RNA polymerase II|DNA-binding transcription factor activity, RNA polymerase II-specific|transcription regulator complex|DNA-binding transcription factor activity|meiotic cell cycle|protein binding|metal ion binding|cytoplasm|PcG protein complex|seque…	GO:0008584|GO:0000978|GO:0008585|GO:0006357|GO:0000981|GO:0005667|GO:0003700|GO:0051321|GO:0005515|GO:0046872|GO:0005737|GO:0031519|GO:1990837	regulation of nucleobase-containing compound metabolic process|organic cyclic compound metabolic process|organic cyclic compound biosynthetic process|macromolecule biosynthetic process|biosynthetic process|regulation of nitrogen compound metabolic process|regulation of nucleic acid-templated transcription|primary metabolic process|cellular metabolic process|molecular_function|macromolecule metabo…
TEAD3	UniProtKB:Q99594	Transcriptional enhancer factor TEF-5	RNA polymerase II cis-regulatory region sequence-specific DNA binding|female pregnancy|embryonic organ development|positive regulation of transcription by RNA polymerase II|chromatin|DNA-binding transcription factor activity, RNA polymerase II-specific|nucleoplasm|regulation of transcription by RNA polymerase II|transcription regulator complex|DNA-binding transcription factor activity|protein bin…	GO:0000978|GO:0007565|GO:0048568|GO:0045944|GO:0000785|GO:0000981|GO:0005654|GO:0006357|GO:0005667|GO:0003700|GO:0005515|GO:0061629|GO:0035329|GO:0055059	regulation of nitrogen compound metabolic process|primary metabolic process|cellular metabolic process|regulation of cellular process|transcription regulator activity|nucleic acid metabolic process|biological regulation|regulation of RNA biosynthetic process|biological_process|metabolic process|cellular biosynthetic process|regulation of biosynthetic process|nucleobase-containing compound metabol…
CREB3L4	UniProtKB:Q8TEY5	Cyclic AMP-responsive element-binding protein 3-like protein 4	spermatogenesis|RNA polymerase II cis-regulatory region sequence-specific DNA binding|DNA-binding transcription activator activity, RNA polymerase II-specific|Golgi membrane|endoplasmic reticulum|Golgi apparatus|positive regulation of transcription by RNA polymerase II|response to unfolded protein|chromatin|DNA-binding transcription factor activity, RNA polymerase II-specific|nucleoplasm|regulati…	GO:0007283|GO:0000978|GO:0001228|GO:0000139|GO:0005783|GO:0005794|GO:0045944|GO:0006986|GO:0000785|GO:0000981|GO:0005654|GO:0006357|GO:0005789|GO:0005634|GO:0031965|GO:0005515|GO:0005739|GO:1990837	regulation of nitrogen compound metabolic process|primary metabolic process|cellular metabolic process|regulation of cellular process|transcription regulator activity|nucleic acid metabolic process|biological regulation|regulation of RNA biosynthetic process|biological_process|metabolic process|cellular biosynthetic process|regulation of biosynthetic process|nucleobase-containing compound metabol…
RFX2	UniProtKB:P48378	DNA-binding protein RFX2	cilium assembly|spermatid development|RNA polymerase II cis-regulatory region sequence-specific DNA binding|DNA-binding transcription activator activity, RNA polymerase II-specific|positive regulation of transcription by RNA polymerase II|chromatin|DNA-binding transcription factor activity, RNA polymerase II-specific|regulation of transcription by RNA polymerase II|DNA binding|acrosome assembly|n…	GO:0060271|GO:0007286|GO:0000978|GO:0001228|GO:0045944|GO:0000785|GO:0000981|GO:0006357|GO:0003677|GO:0001675|GO:0005634|GO:0003700|GO:0005515|GO:1990830|GO:0005737|GO:1990837	heterocyclic compound binding|RNA polymerase II cis-regulatory region sequence-specific DNA binding|RNA polymerase II transcription regulatory region sequence-specific DNA binding|double-stranded DNA binding|cis-regulatory region sequence-specific DNA binding|transcription cis-regulatory region binding|sequence-specific DNA binding|binding|molecular_function|nucleic acid binding|transcription reg…
LHX1	UniProtKB:P48742	LIM/homeobox protein Lhx1	head development|ventral spinal cord development|post-embryonic development|anterior/posterior pattern specification|RNA polymerase II transcription regulatory region sequence-specific DNA binding|transcription by RNA polymerase II|forebrain regionalization|dorsal/ventral pattern formation|anterior/posterior axis specification|transcription regulator complex|negative regulation of DNA-templated t…	GO:0060322|GO:0021517|GO:0009791|GO:0009952|GO:0000977|GO:0006366|GO:0021871|GO:0009953|GO:0009948|GO:0005667|GO:0045892|GO:0072224|GO:0001822|GO:0045893|GO:0001702|GO:0001705|GO:0001706|GO:0032525|GO:0021702|GO:0021549|GO:0030182|GO:0009880|GO:0007267|GO:0000987|GO:0007389|GO:0048646|GO:0000785|GO:0061205|GO:0000981|GO:0009887|GO:0090190|GO:0005634|GO:0005515|GO:0097379|GO:0046872|GO:2000768|GO:…	regulation of nitrogen compound metabolic process|primary metabolic process|cellular metabolic process|regulation of cellular process|transcription regulator activity|nucleic acid metabolic process|biological regulation|regulation of RNA biosynthetic process|biological_process|metabolic process|cellular biosynthetic process|regulation of biosynthetic process|nucleobase-containing compound metabol…
GATA4	UniProtKB:P43694	Transcription factor GATA-4	nuclear body|atrial septum secundum morphogenesis|male gonad development|RNA polymerase II transcription regulator complex|negative regulation of oxidative stress-induced cell death|endoderm development|RNA polymerase II cis-regulatory region sequence-specific DNA binding|RNA polymerase II transcription regulatory region sequence-specific DNA binding|transcription cis-regulatory region binding|DN…	GO:0016604|GO:0003290|GO:0008584|GO:0090575|GO:1903202|GO:0007492|GO:0000978|GO:0000977|GO:0000976|GO:0001228|GO:0045766|GO:0042060|GO:0003208|GO:0045893|GO:0071333|GO:0001947|GO:0060290|GO:0051525|GO:0010575|GO:0019901|GO:0008270|GO:0003180|GO:0086004|GO:0007267|GO:0061049|GO:0000785|GO:0000981|GO:0003215|GO:0051896|GO:0005634|GO:0005515|GO:0010507|GO:0010667|GO:0003190|GO:0043565|GO:0003197|GO:…	biological_process|intestinal epithelial cell differentiation|multicellular organism development|tube development|anatomical structure development|epithelium development|columnar/cuboidal epithelial cell differentiation|cellular developmental process|tissue development|cellular process|epithelial cell differentiation|system development|digestive tract development|digestive system development|cell…
NCOR2	UniProtKB:Q9Y618	Nuclear receptor corepressor 2	nuclear body|negative regulation of miRNA transcription|Notch binding|lactation|protein-containing complex binding|negative regulation of androgen receptor signaling pathway|nucleoplasm|negative regulation of transcription by RNA polymerase II|negative regulation of DNA-templated transcription|nuclear glucocorticoid receptor binding|estrous cycle|histone deacetylase binding|cerebellum development…	GO:0016604|GO:1902894|GO:0005112|GO:0007595|GO:0044877|GO:0060766|GO:0005654|GO:0000122|GO:0045892|GO:0035259|GO:0044849|GO:0042826|GO:0021549|GO:0003682|GO:0000785|GO:0046965|GO:0003677|GO:0005634|GO:0005515|GO:0003714|GO:0017053|GO:0016020|GO:0032355|GO:0016363|GO:0010243|GO:0010565	nucleic acid binding|DNA binding|organic cyclic compound binding|heterocyclic compound binding|binding|molecular_function|chromatin binding|protein-containing complex binding|negative regulation of nitrogen compound metabolic process|regulation of nitrogen compound metabolic process|primary metabolic process|negative regulation of biological process|cellular metabolic process|negative regulation …
VDR	UniProtKB:P11473	Vitamin D3 receptor	calcitriol binding|RNA polymerase II transcription regulator complex|multicellular organism development|negative regulation of cell population proliferation|RNA polymerase II cis-regulatory region sequence-specific DNA binding|mammary gland branching involved in pregnancy|small molecule binding|lactation|decidualization|positive regulation of transcription by RNA polymerase II|nucleoplasm|negativ…	GO:1902098|GO:0090575|GO:0007275|GO:0008285|GO:0000978|GO:0060745|GO:0036094|GO:0007595|GO:0046697|GO:0045944|GO:0005654|GO:0000122|GO:0010839|GO:0003700|GO:0050892|GO:0001501|GO:0045892|GO:0004879|GO:0006816|GO:0070561|GO:0070644|GO:0005829|GO:0070564|GO:0030501|GO:0035435|GO:0042789|GO:0045618|GO:0008270|GO:0060057|GO:0060058|GO:0038186|GO:1902121|GO:0000902|GO:0038183|GO:0060558|GO:1903412|GO:…	regulation of nucleobase-containing compound metabolic process|negative regulation of metabolic process|negative regulation of biosynthetic process|negative regulation of nitrogen compound metabolic process|regulation of nitrogen compound metabolic process|negative regulation of biological process|regulation of nucleic acid-templated transcription|negative regulation of nucleic acid-templated tra…
PBX1	UniProtKB:P40424	Pre-B-cell leukemia transcription factor 1	RNA polymerase II transcription regulator complex|embryonic hemopoiesis|RNA polymerase II cis-regulatory region sequence-specific DNA binding|RNA polymerase II transcription regulatory region sequence-specific DNA binding|anterior/posterior pattern specification|negative regulation of neuron differentiation|transcription cis-regulatory region binding|spleen development|DNA-binding transcription a…	GO:0090575|GO:0035162|GO:0000978|GO:0000977|GO:0009952|GO:0045665|GO:0000976|GO:0048536|GO:0001228|GO:0045944|GO:0009954|GO:0048538|GO:0005654|GO:0030326|GO:0003700|GO:0007548|GO:0000086|GO:0072089|GO:0140297|GO:0030325|GO:0010971|GO:0048568|GO:0006694|GO:0048666|GO:0007420|GO:0048706|GO:0000785|GO:0000981|GO:0009887|GO:0006357|GO:0001222|GO:0001221|GO:0003677|GO:0005634|GO:0001654|GO:0005515|GO:…	nucleic acid binding|DNA binding|transcription regulatory region nucleic acid binding|organic cyclic compound binding|heterocyclic compound binding|RNA polymerase II transcription regulatory region sequence-specific DNA binding|double-stranded DNA binding|transcription cis-regulatory region binding|sequence-specific DNA binding|sequence-specific double-stranded DNA binding|binding|molecular_funct…
HNF4A	UniProtKB:P41235	Hepatocyte nuclear factor 4-alpha	negative regulation of cell population proliferation|RNA polymerase II cis-regulatory region sequence-specific DNA binding|signal transduction involved in regulation of gene expression|anatomical structure development|transcription cis-regulatory region binding|transcription by RNA polymerase II|DNA-binding transcription activator activity, RNA polymerase II-specific|blood coagulation|positive re…	GO:0008285|GO:0000978|GO:0023019|GO:0048856|GO:0000976|GO:0006366|GO:0001228|GO:0007596|GO:0045944|GO:0042752|GO:0042632|GO:0055091|GO:0005654|GO:0050796|GO:0003700|GO:0007548|GO:0009749|GO:0005504|GO:0045892|GO:0030308|GO:0045893|GO:0004879|GO:0070328|GO:0030522|GO:0010470|GO:0008270|GO:0042803|GO:0055088|GO:0006591|GO:0060395|GO:0003682|GO:0005102|GO:0000785|GO:0000981|GO:0006357|GO:0003677|GO:…	regulation of nucleobase-containing compound metabolic process|positive regulation of metabolic process|positive regulation of biosynthetic process|positive regulation of nitrogen compound metabolic process|regulation of nitrogen compound metabolic process|positive regulation of transcription by RNA polymerase II|regulation of nucleic acid-templated transcription|positive regulation of biological…
CTNNB1	UniProtKB:P35222	Catenin beta-1	lung-associated mesenchyme development|negative regulation of angiogenesis|lung epithelial cell differentiation|Scrib-APC-beta-catenin complex|regulation of angiogenesis|synaptic vesicle clustering|positive regulation of DNA-binding transcription factor activity|regulation of timing of anagen|negative regulation of DNA-templated transcription|synaptic vesicle transport|in utero embryonic developm…	GO:0060484|GO:0016525|GO:0060487|GO:0034750|GO:0045765|GO:0097091|GO:0051091|GO:0051884|GO:0045892|GO:0048489|GO:0001701|GO:0045893|GO:0001702|GO:1990403|GO:0098978|GO:0001708|GO:0070602|GO:0030027|GO:0019901|GO:0019903|GO:0007268|GO:0003340|GO:0061324|GO:0044325|GO:0005886|GO:0005634|GO:0030018|GO:0005515|GO:0003338|GO:2000008|GO:0001711|GO:0060916|GO:0071363|GO:0001837|GO:0043123|GO:0097190|GO:…	regulation of nucleobase-containing compound metabolic process|positive regulation of chromosome organization|positive regulation of metabolic process|regulation of chromosome organization|regulation of telomere maintenance via telomere lengthening|regulation of organelle organization|positive regulation of biosynthetic process|positive regulation of nitrogen compound metabolic process|regulation…
TBX3	UniProtKB:O15119	T-box transcription factor TBX3	atrioventricular canal morphogenesis|RNA polymerase II cis-regulatory region sequence-specific DNA binding|DNA-binding transcription activator activity, RNA polymerase II-specific|cardiac muscle cell fate commitment|DNA-binding transcription repressor activity, RNA polymerase II-specific|branching involved in mammary gland duct morphogenesis|hepatoblast differentiation|embryonic digit morphogenes…	GO:1905222|GO:0000978|GO:0001228|GO:0060923|GO:0001227|GO:0060444|GO:0061017|GO:0042733|GO:0001501|GO:0045892|GO:0001701|GO:0001947|GO:0072105|GO:0030540|GO:0001708|GO:0035115|GO:0035116|GO:0019827|GO:0060596|GO:0008595|GO:0060317|GO:0000785|GO:0009887|GO:0000981|GO:0005634|GO:0030857|GO:0005515|GO:0030539|GO:0045662|GO:2000648|GO:0048332|GO:1905072|GO:0032275|GO:0008284|GO:0060021|GO:0090398|GO:…	biological_process|anatomical structure development|anatomical structure morphogenesis|animal organ development|developmental process|animal organ morphogenesis|limb development|multicellular organism development|appendage morphogenesis|limb morphogenesis|forelimb morphogenesis|multicellular organismal process|appendage development|heterocyclic compound binding|RNA polymerase II cis-regulatory re…
Human orthologs with GO involved in reproduction (Proximal germline)
Gene name	Primary source	Gene product name	Direct annotation	GO_term	Involved in
DMRTA1	UniProtKB:Q5VZB9	Doublesex- and mab-3-related transcription factor A1	nucleus|identical protein binding|sex differentiation|protein binding|male mating behavior|metal ion binding|RNA polymerase II cis-regulatory region sequence-specific DNA binding|sequence-specific double-stranded DNA binding|chromatin|DNA-binding transcription factor activity, RNA polymerase II-specific|ovarian follicle development|regulation of transcription by RNA polymerase II	GO:0005634|GO:0042802|GO:0007548|GO:0005515|GO:0060179|GO:0046872|GO:0000978|GO:1990837|GO:0000785|GO:0000981|GO:0001541|GO:0006357	regulation of nitrogen compound metabolic process|primary metabolic process|cellular metabolic process|regulation of cellular process|transcription regulator activity|nucleic acid metabolic process|biological regulation|regulation of RNA biosynthetic process|biological_process|metabolic process|cellular biosynthetic process|regulation of biosynthetic process|nucleobase-containing compound metabol…
TUT7	UniProtKB:Q5VYS8	Terminal uridylyltransferase 7	miRNA binding|zinc ion binding|pre-miRNA processing|polyuridylation-dependent mRNA catabolic process|nuclear-transcribed mRNA poly(A) tail shortening|nucleoplasm|RNA uridylyltransferase activity|RNA 3' uridylation|RNA binding|protein binding|oocyte maturation|retrotransposon silencing by mRNA destabilization|cytoplasm|RNA 3'-end processing|cytosol|uridylyltransferase activity|miRNA metabolic proc…	GO:0035198|GO:0008270|GO:0031054|GO:1990074|GO:0000289|GO:0005654|GO:0050265|GO:0071076|GO:0003723|GO:0005515|GO:0001556|GO:0141008|GO:0005737|GO:0031123|GO:0005829|GO:0070569|GO:0010586	nucleic acid binding|RNA binding|organic cyclic compound binding|heterocyclic compound binding|binding|molecular_function|protein binding|zinc ion binding|transition metal ion binding|metal ion binding|ion binding|cation binding|miRNA binding|regulatory RNA binding|RNA uridylyltransferase activity|nucleotidyltransferase activity|catalytic activity|transferase activity, transferring phosphorus-con…
PPARD	UniProtKB:Q03181	Peroxisome proliferator-activated receptor delta	positive regulation of phosphatidylinositol 3-kinase signaling|phosphatidylinositol 3-kinase signaling|RNA polymerase II cis-regulatory region sequence-specific DNA binding|positive regulation of fat cell differentiation|decidualization|DNA-binding transcription repressor activity, RNA polymerase II-specific|glucose metabolic process|transcription coactivator binding|glucose transmembrane transpo…	GO:0014068|GO:0014065|GO:0000978|GO:0045600|GO:0046697|GO:0001227|GO:0006006|GO:0001223|GO:1904659|GO:0009755|GO:0006635|GO:0009749|GO:0032966|GO:0042060|GO:0015908|GO:0045892|GO:0030308|GO:0045893|GO:0006915|GO:0097009|GO:2000277|GO:0071456|GO:0008270|GO:0006091|GO:0050728|GO:0006776|GO:0000785|GO:0000981|GO:0051059|GO:0005634|GO:0005515|GO:0031669|GO:0045662|GO:0010628|GO:0050680|GO:2000288|GO:…	regulation of nitrogen compound metabolic process|primary metabolic process|cellular metabolic process|regulation of cellular process|transcription regulator activity|nucleic acid metabolic process|biological regulation|regulation of RNA biosynthetic process|biological_process|metabolic process|cellular biosynthetic process|regulation of biosynthetic process|nucleobase-containing compound metabol…
TESMIN	UniProtKB:Q9Y4I5	Tesmin	nucleus|metal ion binding|cytoplasm|male meiotic nuclear division|spermatogenesis|cell differentiation|response to metal ion|regulation of DNA-templated transcription|intracellular monoatomic cation homeostasis|male germ cell nucleus	GO:0005634|GO:0046872|GO:0005737|GO:0007140|GO:0007283|GO:0030154|GO:0010038|GO:0006355|GO:0030003|GO:0001673	metal ion binding|ion binding|cation binding|binding|molecular_function|biological_process|multicellular organismal reproductive process|male meiotic nuclear division|meiotic cell cycle process|cell cycle process|reproductive process|gamete generation|organelle organization|cellular process|cell cycle|reproduction|cellular process involved in reproduction in multicellular organism|male gamete gen…
ZFP42	UniProtKB:Q96MM3	Zinc finger protein 42 homolog	male gonad development|RNA polymerase II cis-regulatory region sequence-specific DNA binding|female gonad development|regulation of transcription by RNA polymerase II|DNA-binding transcription factor activity, RNA polymerase II-specific|transcription regulator complex|DNA-binding transcription factor activity|meiotic cell cycle|protein binding|metal ion binding|cytoplasm|PcG protein complex|seque…	GO:0008584|GO:0000978|GO:0008585|GO:0006357|GO:0000981|GO:0005667|GO:0003700|GO:0051321|GO:0005515|GO:0046872|GO:0005737|GO:0031519|GO:1990837	regulation of nucleobase-containing compound metabolic process|organic cyclic compound metabolic process|organic cyclic compound biosynthetic process|macromolecule biosynthetic process|biosynthetic process|regulation of nitrogen compound metabolic process|regulation of nucleic acid-templated transcription|primary metabolic process|cellular metabolic process|molecular_function|macromolecule metabo…
JUNB	UniProtKB:P17275	Transcription factor JunB	RNA polymerase II transcription regulator complex|RNA polymerase II cis-regulatory region sequence-specific DNA binding|DNA-binding transcription activator activity, RNA polymerase II-specific|decidualization|vasculogenesis|positive regulation of transcription by RNA polymerase II|nucleoplasm|osteoclast proliferation|regulation of T-helper 17 cell differentiation|transcription regulator complex|c…	GO:0090575|GO:0000978|GO:0001228|GO:0046697|GO:0001570|GO:0045944|GO:0005654|GO:0002158|GO:2000319|GO:0005667|GO:0071277|GO:0001649|GO:0035976|GO:0051726|GO:0001829|GO:0045597|GO:0008134|GO:0060136|GO:0000785|GO:0042127|GO:0000981|GO:0006357|GO:0030316|GO:0003677|GO:0005634|GO:0005515|GO:0060716|GO:0033687|GO:0140467|GO:1990837	regulation of nitrogen compound metabolic process|primary metabolic process|cellular metabolic process|regulation of cellular process|transcription regulator activity|nucleic acid metabolic process|biological regulation|regulation of RNA biosynthetic process|biological_process|metabolic process|cellular biosynthetic process|regulation of biosynthetic process|nucleobase-containing compound metabol…
HMGB2	UniProtKB:P26583	High mobility group protein B2	male gonad development|positive chemotaxis|double-stranded DNA binding|transcription cis-regulatory region binding|DNA binding, bending|chemoattractant activity|positive regulation of DNA binding|chromatin organization|extrinsic apoptotic signaling pathway via death domain receptors|positive regulation of erythrocyte differentiation|single-stranded DNA binding|cell chemotaxis|RNA binding|inflamma…	GO:0008584|GO:0050918|GO:0003690|GO:0000976|GO:0008301|GO:0042056|GO:0043388|GO:0006325|GO:0008625|GO:0045648|GO:0003697|GO:0060326|GO:0003723|GO:0002437|GO:0045892|GO:0045893|GO:0032728|GO:0050830|GO:1902042|GO:0019904|GO:0045654|GO:0000987|GO:0000785|GO:0006334|GO:0000793|GO:0010629|GO:0005634|GO:0005515|GO:0032991|GO:0050767|GO:0032392|GO:0032075|GO:0072091|GO:0044378|GO:0006265|GO:0006303|GO:…	nucleic acid binding|DNA binding|heterocyclic compound binding|organic cyclic compound binding|DNA secondary structure binding|binding|four-way junction DNA binding|molecular_function|transcription regulatory region nucleic acid binding|double-stranded DNA binding|transcription cis-regulatory region binding|sequence-specific DNA binding|sequence-specific double-stranded DNA binding|cis-regulatory…
EGR1	UniProtKB:P18146	Early growth response protein 1	double-stranded methylated DNA binding|circadian temperature homeostasis|RNA polymerase II cis-regulatory region sequence-specific DNA binding|RNA polymerase II transcription regulatory region sequence-specific DNA binding|transcription cis-regulatory region binding|DNA-binding transcription activator activity, RNA polymerase II-specific|regulation of transcription from RNA polymerase II promoter…	GO:0010385|GO:0060086|GO:0000978|GO:0000977|GO:0000976|GO:0001228|GO:0061418|GO:1902949|GO:0009749|GO:0032922|GO:0001666|GO:1990841|GO:0035914|GO:0045893|GO:0030509|GO:0072303|GO:0032722|GO:0008270|GO:0035035|GO:0044849|GO:0044729|GO:1901875|GO:0000785|GO:0000981|GO:0030217|GO:0005634|GO:0071480|GO:0005515|GO:0010628|GO:2000182|GO:0043565|GO:1902895|GO:0043523|GO:0045944|GO:0005654|GO:0000122|GO:…	nucleic acid binding|DNA binding|transcription regulatory region nucleic acid binding|organic cyclic compound binding|heterocyclic compound binding|double-stranded DNA binding|transcription cis-regulatory region binding|sequence-specific DNA binding|sequence-specific double-stranded DNA binding|binding|molecular_function|RNA polymerase II transcription regulatory region sequence-specific DNA bind…
PBX1	UniProtKB:P40424	Pre-B-cell leukemia transcription factor 1	RNA polymerase II transcription regulator complex|embryonic hemopoiesis|RNA polymerase II cis-regulatory region sequence-specific DNA binding|RNA polymerase II transcription regulatory region sequence-specific DNA binding|anterior/posterior pattern specification|negative regulation of neuron differentiation|transcription cis-regulatory region binding|spleen development|DNA-binding transcription a…	GO:0090575|GO:0035162|GO:0000978|GO:0000977|GO:0009952|GO:0045665|GO:0000976|GO:0048536|GO:0001228|GO:0045944|GO:0009954|GO:0048538|GO:0005654|GO:0030326|GO:0003700|GO:0007548|GO:0000086|GO:0072089|GO:0140297|GO:0030325|GO:0010971|GO:0048568|GO:0006694|GO:0048666|GO:0007420|GO:0048706|GO:0000785|GO:0000981|GO:0009887|GO:0006357|GO:0001222|GO:0001221|GO:0003677|GO:0005634|GO:0001654|GO:0005515|GO:…	nucleic acid binding|DNA binding|transcription regulatory region nucleic acid binding|organic cyclic compound binding|heterocyclic compound binding|RNA polymerase II transcription regulatory region sequence-specific DNA binding|double-stranded DNA binding|transcription cis-regulatory region binding|sequence-specific DNA binding|sequence-specific double-stranded DNA binding|binding|molecular_funct…
HNF4A	UniProtKB:P41235	Hepatocyte nuclear factor 4-alpha	negative regulation of cell population proliferation|RNA polymerase II cis-regulatory region sequence-specific DNA binding|signal transduction involved in regulation of gene expression|anatomical structure development|transcription cis-regulatory region binding|transcription by RNA polymerase II|DNA-binding transcription activator activity, RNA polymerase II-specific|blood coagulation|positive re…	GO:0008285|GO:0000978|GO:0023019|GO:0048856|GO:0000976|GO:0006366|GO:0001228|GO:0007596|GO:0045944|GO:0042752|GO:0042632|GO:0055091|GO:0005654|GO:0050796|GO:0003700|GO:0007548|GO:0009749|GO:0005504|GO:0045892|GO:0030308|GO:0045893|GO:0004879|GO:0070328|GO:0030522|GO:0010470|GO:0008270|GO:0042803|GO:0055088|GO:0006591|GO:0060395|GO:0003682|GO:0005102|GO:0000785|GO:0000981|GO:0006357|GO:0003677|GO:…	regulation of nucleobase-containing compound metabolic process|positive regulation of metabolic process|positive regulation of biosynthetic process|positive regulation of nitrogen compound metabolic process|regulation of nitrogen compound metabolic process|positive regulation of transcription by RNA polymerase II|regulation of nucleic acid-templated transcription|positive regulation of biological…
