# Supplementary material for: A Transcription Factor Functional Atlas of Germline Development
Source: Research Square preprint supplement (doi:10.21203/rs.3.rs-3880498/v1), 2024-01-26
Supplement: Supplementary file 7 [file 782fa784e1ceef9205fa66a7.xlsx]

## Sheet: Figure 2A
Quantification of PZ germ cells of 3xflag::sygl-1; sun-1p::rde-1; rde-1(mkc36) one-day adults.
Data is normalised to control.
	control	C02F5.12 RNAi		control	C30G4.4 RNAi		control	daf-19 RNAi		control	F54F2.9 RNAi		control	ZK546.5 RNAi		control	hsf-1 RNAi		control	let-607 RNAi		control	nhr-84 RNAi		control	xnd-1 RNAi		control	ztf-23 RNAi		control	nhr-146 RNAi
	90.8807	121.313		90.8807	117.561		90.8807	83.3768		90.8807	120.063		90.8807	125.065		90.8807	102.553		90.8807	82.9599		90.8807	90.0469		90.8807	105.055		90.8807	61.2819		90.8807	95.0495
	84.2105	117.144		84.2105	120.896		84.2105	96.3002		84.2105	139.239		84.2105	103.804		84.2105	82.1261		84.2105	93.382		84.2105	77.5404		84.2105	85.8781		84.2105	50.4429		84.2105	114.643
	91.7144	136.738		91.7144	150.495		91.7144	117.978		91.7144	113.809		91.7144	114.226		91.7144	91.2976		91.7144	93.382		91.7144	110.891		91.7144	83.3768		91.7144	75.8729		91.7144	92.1313
	97.1339	102.553		97.1339	127.983		97.1339	107.556		97.1339	103.804		97.1339	108.807		97.1339	70.4534		97.1339	81.2923		97.1339	85.0443		97.1339	92.5482		97.1339	104.638		97.1339	109.64
	119.229	131.318		119.229	102.97		119.229	100.886		119.229	112.559		119.229	127.15		119.229	75.0391		119.229	98.3846		119.229	88.7962		119.229	93.7989		119.229	109.224		119.229	96.717
	112.142	113.392		112.142	90.8807		112.142	108.807		112.142	102.137		112.142	111.308		112.142	95.8833		112.142	77.9573		112.142	77.1235		112.142	85.4612		112.142	107.973		112.142	110.474
	106.305	159.25		106.305	153.83		106.305	135.07		106.305	120.063		106.305	101.72		106.305	97.5508		106.305	81.2923		106.305	93.7989		106.305	83.7936		106.305	92.1313		106.305	105.472
	98.3846	113.392		98.3846	108.807		98.3846	122.564		98.3846	120.479		98.3846	112.142		98.3846	86.7118		98.3846	64.2001		98.3846	124.648		98.3846	90.8807		98.3846	115.06		98.3846	111.308
	101.825	136.556		101.825	104.983		94.4303	145.938		89.4462	112.017		94.4303	117.731		96.31	77.4908		113.021	99.1038		101.131	87.1531		106.25	66.1765		106.25	68.0147		92.9057	85.1312
	91.9586	124.716		91.9586	123.927		95.6566	127.133		89.0282	144.201		95.6566	136.127		102.952	71.9557		102.056	86.0306		105.242	69.8869		101.103	78.6765		101.103	69.4853		111.565	70.3596
	119.191	138.925		119.191	126.69		103.832	134.9		111.599	109.091		103.832	121.002		94.8339	71.9557		103.743	69.1618		90.853	57.554		99.6324	81.6176		99.6324	87.5		97.5705	83.5763
	113.666	122.348		113.666	150.765		96.0654	108.738		90.7001	114.107		96.0654	127.951		84.5018	63.8376		99.9473	85.1871		114.697	82.631		89.3382	69.4853		89.3382	77.9412		98.3479	89.4072
	86.8278	144.845		86.8278	110.113		105.059	106.285		106.583	126.228		105.059	124.272		118.45	60.5166		105.008	73.379		103.597	83.0421		100.735	82.7206		100.735	83.4559		95.6268	80.8552
	113.271	91.9586		113.271	115.639		95.2478	107.92		102.821	142.529		95.2478	134.492		100.369	87.0849		84.3437	64.9446		83.4532	63.3094		93.3824	95.5882		93.3824	97.4265		84.3537	71.9145
	86.0385	104.983		86.0385	105.377		99.7445	113.643		99.8955	127.9		99.7445	119.775		114.022	70.1107		94.8867	76.7528		101.131	90.0308		106.25	62.5		106.25	84.9265		128.669	69.5821
	87.2225	112.087		87.2225	120.375		109.964	122.637		109.927	135.423		109.964	94.839		88.5609	71.9557		96.9953	79.7048		99.8972	62.8983		103.309	69.1176		103.309	72.4265		90.9621	89.4072
	112.5	117.188		112.5	103.516		112.5	120.312		112.5	111.719		112.5	107.031		112.5	98.8281		112.5	110.938		112.5	89.4531		112.5	89.8438		112.5	92.5781		87.7904	63.6678
	97.2656	128.906		97.2656	103.516		97.2656	116.406		97.2656	100		97.2656	105.859		97.2656	105.469		97.2656	104.688		97.2656	107.422		97.2656	87.1094		97.2656	78.5156		89.7677	77.1132
	110.547	85.1562		110.547	111.328		110.547	139.062		110.547	91.4062		110.547	104.688		110.547	116.016		110.547	119.141		110.547	124.609		110.547	82.8125		110.547	80.8594		86.2086	54.5724
	93.75	107.812		93.75	68.3594		93.75	120.312		93.75	92.1875		93.75	112.891		93.75	117.188		93.75	104.688		93.75	84.7656		93.75	99.6094		93.75	85.9375		94.9086	97.2813
	102.344	91.0156		102.344	89.8438		102.344	114.453		102.344	110.547		102.344	107.422		102.344	96.0938		102.344	94.1406		102.344	89.8438		102.344	101.953		102.344	81.6406		102.818	98.8631
	89.4531	125.781		89.4531	107.031		89.4531	116.406		89.4531	136.719		89.4531	105.859		89.4531	100		89.4531	110.156		89.4531	94.5312		89.4531	105.469		89.4531	100.391		93.7222	86.9995
	94.1406	126.172		94.1406	112.5		94.1406	105.469		94.1406	102.344		94.1406	109.766		94.1406	101.562		94.1406	91.0156		94.1406	108.984		94.1406	71.875		94.1406	105.078		134.058	88.1859
		112.109			93.3594			107.422			78.125			86.7188			102.734			103.906			112.5			69.1406			78.125		110.727	85.4177
Total N	23	24		23	24		23	24		23	24		23	24		23	24		23	24		23	24		23	24		23	24		24	24
Mean	100	119.403		100	113.364		100	115.816		100	115.279		100	113.36		100	88.1006		100	89.4078		100	89.8544		100	84.7703		100	85.8719		100	88.657
Data prior to normalisation.
	control	C02F5.12 RNAi		control	C30G4.4 RNAi		control	daf-19 RNAi		control	F54F2.9 RNAi		control	ZK546.5 RNAi		control	hsf-1 RNAi		control	let-607 RNAi		control	nhr-84 RNAi		control	xnd-1 RNAi		control	ztf-23 RNAi		control	nhr-146 RNAi
	218	291		218	282		218	200		218	288		218	300		218	246		218	199		218	216		218	252		218	147		218	228
	202	281		202	290		202	231		202	334		202	249		202	197		202	224		202	186		202	206		202	121		202	275
	220	328		220	361		220	283		220	273		220	274		220	219		220	224		220	266		220	200		220	182		220	221
	233	246		233	307		233	258		233	249		233	261		233	169		233	195		233	204		233	222		233	251		233	263
	286	315		286	247		286	242		286	270		286	305		286	180		286	236		286	213		286	225		286	262		286	232
	269	272		269	218		269	261		269	245		269	267		269	230		269	187		269	185		269	205		269	259		269	265
	255	382		255	369		255	324		255	288		255	244		255	234		255	195		255	225		255	201		255	221		255	253
	236	272		236	261		236	294		236	289		236	269		236	208		236	154		236	299		236	218		236	276		236	267
Mean	239.875	298.375		239.875	291.875		239.875	261.625		239.875	279.5		239.875	271.125		239.875	210.375		239.875	201.75		239.875	224.25		239.875	216.125		239.875	214.875		239.875	250.5
	258	346		258	266		231	357		214	268		231	288		261	210		268	235		246	212		289	180		289	185		239	219
	233	316		233	314		234	311		213	345		234	333		279	195		242	204		256	170		275	214		275	189		287	181
	302	352		302	321		254	330		267	261		254	296		257	195		246	164		221	140		271	222		271	238		251	215
	288	310		288	382		235	266		217	273		235	313		229	173		237	202		279	201		243	189		243	212		253	230
	220	367		220	279		257	260		255	302		257	304		321	164		249	174		252	202		274	225		274	227		246	208
	287	233		287	293		233	264		246	341		233	329		272	236		200	154		203	154		254	260		254	265		217	185
	218	266		218	267		244	278		239	306		244	293		309	190		225	182		246	219		289	170		289	231		331	179
	221	284		221	305		269	300		263	324		269	232		240	195		230	189		243	153		281	188		281	197		234	230
Mean	253.375	309.25		253.375	303.375		244.625	295.75		239.25	302.5		244.625	298.5		271	194.75		237.125	188		243.25	181.375		272	206		272	218		257.25	205.875
	288	300		288	265		288	308		288	286		288	274		288	253		288	284		288	229		288	230		288	237		222	161
	249	330		249	265		249	298		249	256		249	271		249	270		249	268		249	275		249	223		249	201		227	195
	283	218		283	285		283	356		283	234		283	268		283	297		283	305		283	319		283	212		283	207		218	138
	240	276		240	175		240	308		240	236		240	289		240	300		240	268		240	217		240	255		240	220		240	246
	262	233		262	230		262	293		262	283		262	275		262	246		262	241		262	230		262	261		262	209		260	250
	229	322		229	274		229	298		229	350		229	271		229	256		229	282		229	242		229	270		229	257		237	220
	241	323		241	288		241	270		241	262		241	281		241	260		241	233		241	279		241	184		241	269		339	223
		287			239			275			200			222			263			266			288			177			200		280	216
Mean	256	286.125		256	252.625		256	300.75		256	263.375		256	268.875		256	268.125		256	268.375		256	259.875		256	226.5		256	225		252.875	206.125

## Sheet: Figure 2B
Quantification of PZ germ cells of one-day adults of sun-1p::rde-1; rde-1(mkc36) treated with control RNAi or glp-1(ar202); sun-1p::rde-1; rde-1(mkc36) treated with control or experimental RNAi.
Data is normalised to control of glp-1(ar202); sun-1p::rde-1; rde-1(mkc36) strain.
	sun-1p::rde-1; rde-1(mkc36)	glp-1(ar202); sun-1p::rde-1; rde-1(mkc36)
	control	control	C02F5.12 RNAi	C30G4.4 RNAi	daf-19 RNAi	F54F2.9 RNAi	ZK546.5 RNAi	hsf-1 RNAi	let-607 RNAi	nhr-84 RNAi	xnd-1 RNAi	ztf-23 RNAi	nhr-146 RNAi
	65.756	189.644	85.1334	118.17	75.6036	171.537	199.492	71.474	74.0152	90.216	58.4498	132.465	65.4384
	65.756	71.7916	80.6861	75.9212	84.4981	85.7687	70.2033	105.146	72.4269	113.088	89.8983	78.4625	94.3456
	62.8971	85.4511	66.3914	112.77	106.417	82.5921	75.9212	67.3443	85.7687	86.4041	67.3443	89.263	79.4155
	57.4968	98.1576	69.568	102.287	87.0394	117.217	86.7217	88.6277	80.0508	78.1449	71.1563	113.405	68.615
	78.7802	86.4041	86.4041	105.146	70.521	90.5337	80.6861	87.6747	83.8628	90.8513	62.2618	87.0394	57.8145
	63.8501	105.781	79.0978	102.287	101.017	81.9568	81.0038	87.3571	146.76	86.7217	84.8158	93.3926	59.0851
	54.9555	79.7332	69.8856	75.2859	78.7802	90.216	119.123	84.4981	114.041	120.394	124.524	177.573	129.924
	77.8272	89.8983	74.0152	108.64	88.6277	116.264	64.4854	79.7332	74.9682	104.511	60.3558	80.3685	68.9327
	90.216	99.7459	59.0851	92.7573	75.9212	88.6277	112.452	72.7446	71.474	67.3443	86.4041	91.8043	71.474
	74.7886	93.3926	74.3329	99.1105	65.1207	83.0189	159.784	87.9924	73.0623	195.68	66.3914	96.8869	96.6168
	81.2297	96.259	88.31	87.3571	118.806	76.2199	90.8513	112.362	58.7675	77.6513	73.6976	98.406	89.1022
	82.661	112.362	143.852	111.646	76.9356	107.352	173.761	73.715	96.6168	98.406	93.3926	90.1757	109.141
	75.5042	119.519	138.126	143.494	81.5875	82.3032	89.46	77.6513	97.3325	91.2492	83.0189	103.058	96.6168
	75.5042	94.4698	84.8081	125.96	116.656	94.1119	99.8374	111.288	106.994	75.8621	88.3865	91.9649	91.2492
	85.5238	108.426	109.857	106.994	93.7541	96.6168	108.426	57.9701	78.367	115.582	110.93	155.303	93.0384
	89.46	104.847	102.7	127.391	114.867	87.6708	99.4795	117.729	89.46	66.9161	150.293	96.6168	74.0729
	86.9551	140.631	122.381	111.288	91.9649	71.568	109.499	65.8426	106.994	237.964	59.7593	119.519	86.9551
	75.5042	78.7248	81.5875	83.0189	117.014	100.553	115.94	84.0924	101.627	82.3032	102.7	113.793	114.509
	71.9258	66.5582	82.661	79.4405	74.7886	79.4405	117.372	65.8426	163.533	74.7886	91.2492	115.224	97.6903
	84.8249	100.195	79.0826	99.1217	91.607	98.7638	94.8276	70.8523	104.847	79.3774	88.7443	91.4397	91.9649
	107.782	78.0091	99.4795	135.979	97.3325	64.2023	109.857	92.6806	83.0189	82.4903	75.5042	107.393	84.0924
	98.8327	69.6498	81.7121	82.8794	226.871	99.6109	134.906	111.673	84.0467	87.5486	100.195	81.323	96.8872
	82.8794	82.8794	122.179	109.728	74.3191	89.4942	107.71	94.5525	61.8677	119.066	96.259	80.9339	69.6498
	90.2724	114.008	114.397	78.5992	113.23	80.1556	108.068	107.004	95.3307	175.486	81.7121	66.537	96.4981
	71.2062	133.463	120.233	82.8794	72.7626	84.4358	124.528	84.0467	101.167	85.214	108.171	82.8794	83.6576
	98.8327	162.257	100.778	89.1051	95.3307	109.339	130.254	52.9183	73.1518	72.3735	52.5292	106.226	144.747
	89.4942	93.7743	104.669	101.946	80.1556	88.3268	106.226	80.5447	90.2724	96.4981	82.4903	98.4436	101.946
	92.607	89.4942	147.471	71.9844	126.07	117.51	92.2179	101.167	78.5992	100.389	87.5486	64.9805	85.214
	74.3191	83.2685	110.895	96.4981	101.556	91.4397	105.447	59.9222	119.066	73.93	85.214	94.1634	88.716
	68.8716	99.2218	89.8833	127.626		102.335	82.8794	75.8755	63.4241	81.7121	100	79.3774	63.035
	69.6498	71.9844	102.335	94.1634		119.844	99.6109	84.8249	68.8716		82.1012	60.3113	86.3813
						98.4436	80.9339	133.074	65.7588		68.8716
							100.778		85.9922		84.4358
							83.6576				91.0506
							133.074
							116.732
							103.113
Total N	31	31	31	31	29	32	37	32	33	30	34	31	31
Mean	78.9085	100	95.8709	101.273	96.5225	95.2334	107.279	85.8819	89.4405	100.272	85.584	98.0235	88.2847
Data prior to normalisation.
	sun-1p::rde-1; rde-1(mkc36)	glp-1(ar202); sun-1p::rde-1; rde-1(mkc36)
	control	control	C02F5.12 RNAi	C30G4.4 RNAi	daf-19 RNAi	F54F2.9 RNAi	ZK546.5 RNAi	hsf-1 RNAi	let-607 RNAi	nhr-84 RNAi	xnd-1 RNAi	ztf-23 RNAi	nhr-146 RNAi
	207	597	268	372	238	540	628	225	233	284	184	417	206
	207	226	254	239	266	270	221	331	228	356	283	247	297
	198	269	209	355	335	260	239	212	270	272	212	281	250
	181	309	219	322	274	369	273	279	252	246	224	357	216
	248	272	272	331	222	285	254	276	264	286	196	274	182
	201	333	249	322	318	258	255	275	462	273	267	294	186
	173	251	220	237	248	284	375	266	359	379	392	559	409
	245	283	233	342	279	366	203	251	236	329	190	253	217
	284	314	186	292	239	279	354	229	225	212	272	289	225
		294	234	312	205		503	277	230	616	209	305
			278	275	374		286		185		232
							547				294
Mean	216	314.8	238.364	309	272.545	323.444	344.833	262.1	267.636	325.3	246.25	327.6	243.111
	209	269	402	312	215	232	250	314	270	217	232	275	270
	227	314	386	401	228	213	279	206	272	275	247	252	249
	231	334	237	352	326	300	303	217	299	255	310	288	305
	211	264	307	299	262	230	278	311	219	212	420	257	270
	211	303	287	356	321	263	306	162	250	323	167	434	255
	239	293	342	311	257	270	324	329	299	187	287	270	260
	250	393	228	232	327	245	328	184	284	665	255	334	207
	243	220	231	222	209	200	265	235	457	230	248	318	243
	211	186	221	277	256	281	307	184	293	209	211	322	320
	201	280	278	380	272	222	377	198	232		280		273
		218			634	276	301	259			269		257
							302						235
							348
							364
Mean	223.3	279.455	291.9	314.2	300.636	248.364	309.429	236.273	287.5	285.889	266	305.556	262
	218	179	210	213	191	165	273	287	216	204	210	235	249
	277	213	314	282	291	256	237	243	159	212	278	276	179
	254	293	294	202	187	230	271	275	245	225	135	209	248
	213	343	309	213	245	206	213	216	260	306	212	208	215
	232	417	259	229	206	217	256	136	188	451	225	171	372
	183	241	269	262	324	281	208	207	232	219	219	213	262
	254	230	379	185	261	227	259	260	202	186	257	273	219
	230	214	285	248		302	215	154	306	248	211	253	228
	238	255	231	328		235	342	195	163	258	177	167	162
	191	185	263	242		263	300	218	177	190	217	242	222
	177					308	265	342	169	210	234	204
	179					253			221			155
Mean	220.5	257	281.3	240.4	243.571	245.25	258.091	230.273	211.5	246.273	215.909	217.167	235.6

## Sheet: Figure 2D
Quantification of SYGL-1+ germ cells of 3xflag::sygl-1; sun-1p::rde-1; rde-1(mkc36) one-day adults.
Data is normalised to control.
	control	C02F5.12 RNAi		control	C30G4.4 RNAi		control	daf-19 RNAi		control	F54F2.9 RNAi		control	ZK546.5 RNAi		control	hsf-1 RNAi		control	let-607 RNAi		control	nhr-84 RNAi		control	xnd-1 RNAi		control	ztf-23 RNAi		control	nhr-146 RNAi
	79.7677	113.069		79.7677	106.099		79.7677	95.2565		79.7677	98.3543		79.7677	111.52		79.7677	111.52		79.7677	107.648		79.7677	81.3166		79.7677	109.197		79.7677	66.6021		79.7677	89.8354
	102.227	107.648		102.227	86.7377		102.227	92.1588		102.227	120.039		102.227	125.46		102.227	90.6099		102.227	100.678		102.227	87.5121		102.227	92.9332		102.227	57.3088		102.227	106.873
	82.091	121.588		82.091	135.528		82.091	130.881		82.091	119.264		82.091	117.715		82.091	93.7077		82.091	97.5799		82.091	97.5799		82.091	96.8054		82.091	90.6099		82.091	80.5421
	120.039	110.745		120.039	107.648		120.039	114.618		120.039	115.392		120.039	106.099		120.039	67.3766		120.039	68.151		120.039	83.6399		120.039	103.775		120.039	132.43		120.039	113.069
	130.881	133.204		130.881	120.039		130.881	103.775		130.881	103.775		130.881	99.9032		130.881	85.9632		130.881	96.031		130.881	97.5799		130.881	95.2565		130.881	111.52		130.881	108.422
	85.1888	123.136		85.1888	101.452		85.1888	109.971		85.1888	91.3843		85.1888	90.6099		85.1888	65.8277		85.1888	88.2865		85.1888	92.9332		85.1888	84.4143		85.1888	113.069		85.1888	88.2865
	103.001	174.25		103.001	100.678		103.001	124.685		103.001	99.9032		103.001	103.001		103.001	82.8654		103.001	74.3466		103.001	104.55		103.001	89.8354		103.001	97.5799		103.001	111.52
	96.8054	147.919		96.8054	99.9032		96.8054	99.1287		96.8054	99.1287		96.8054	116.166		96.8054	75.121		96.8054	86.7377		96.8054	132.43		96.8054	99.1287		96.8054	102.227		96.8054	72.7977
	109.018	64.1283		109.018	118.637		110.092	126.402		121.615	89.3112		110.092	127.217		106.024	94.7791		114.685	121.212		107.206	112.263		112.239	81.99		112.239	66.0697		89.8036	83.0683
	89.7796	141.884		89.7796	90.5812		106.014	135.372		97.8622	138.717		106.014	155.759		93.1727	81.9277		83.9161	79.2541		125.411	71.8078		105.871	74.0298		105.871	78.806		104.022	95.0421
	142.685	144.289		142.685	122.645		106.014	110.907		98.8123	107.363		106.014	114.169		97.992	78.7149		103.496	82.0513		81.9216	69.7851		86.7662	84.3781		86.7662	84.3781		109.261	77.8298
	109.82	94.5892		109.82	127.455		101.937	99.4903		107.363	93.1116		101.937	132.926		76.3052	56.2249		102.564	93.2401		115.297	81.9216		102.687	50.9453		102.687	92.3383		115.996	104.022
	88.1763	101.002		88.1763	76.9539		106.83	98.6748		105.463	117.815		106.83	137.003		86.747	80.3213		85.7809	87.6457		75.8534	70.7965		96.3184	96.3184		96.3184	98.7065		81.5716	83.8166
	91.3828	95.3908		91.3828	131.463		83.9959	121.509		71.2589	118.765		83.9959	133.741		114.056	89.1566		81.1189	58.7413		82.933	73.8306		100.299	78.806		100.299	102.687		100.281	83.8166
	95.3908	129.058		95.3908	97.7956		81.5494	100.306		95.962	132.066		81.5494	83.9959		155.02	75.502		115.618	83.9161		104.172	83.9444		102.687	55.7214		102.687	97.9104		93.5454	75.5847
	73.7475	116.233		73.7475	94.5892		103.568	110.092		101.663	127.316		103.568	114.985		70.6827	69.0763		112.82	105.361		107.206	94.0581		93.1343	74.8259		93.1343	96.3184		105.519	101.029
	107.05	98.6985		107.05	49.3492		107.05	110.087		107.05	78.9588		107.05	121.475		107.05	104.772		107.05	100.976		107.05	119.197		107.05	88.8286		107.05	88.8286		86.5362	88.3774
	94.1432	110.846		94.1432	104.013		94.1432	78.1996		94.1432	43.2755		94.1432	141.215		94.1432	111.605		94.1432	78.9588		94.1432	99.4577		94.1432	95.6616		94.1432	97.9393		92.9804	129.804
	112.364	77.4403		112.364	85.7918		112.364	119.197		112.364	100.217		112.364	134.382		112.364	113.883		112.364	144.252		112.364	114.642		112.364	95.6616		112.364	95.6616		102.186	77.3303
	96.4208	103.254		96.4208	73.6442		96.4208	85.0325		96.4208	76.6811		96.4208	107.05		96.4208	89.5878		96.4208	129.067		96.4208	61.4967		96.4208	97.9393		96.4208	87.3102		104.028	127.963
	91.8655	91.8655		91.8655	78.9588		91.8655	98.6985		91.8655	100.217		91.8655	116.92		91.8655	86.551		91.8655	94.9024		91.8655	94.9024		91.8655	93.3839		91.8655	100.217		92.9804	126.122
	83.5141	126.79		83.5141	97.18		83.5141	95.6616		83.5141	81.2364		83.5141	109.328		83.5141	101.735		83.5141	91.1063		83.5141	85.0325		83.5141	100.976		83.5141	116.92		106.789	104.028
	114.642	109.328		114.642	75.9219		114.642	81.9956		114.642	57.7006		114.642	73.6442		114.642	104.772		114.642	88.0694		114.642	99.4577		114.642	84.2733		114.642	104.772		102.186	95.7422
		113.124			78.9588			105.531			67.5705			81.9956			102.495			108.568			81.9956			89.5878			94.1432		112.313	130.725
Total N	23	24		23	24		23	24		23	24		23	24		23	24		23	24		23	24		23	24		23	24		24	24
Mean	100	114.562		100	98.4175		100	106.151		100	99.0651		100	114.845		100	88.0873		100	94.4492		100	91.3388		100	88.1114		100	94.7646		100	98.152
Data prior to normalisation.
	control	C02F5.12 RNAi		control	C30G4.4 RNAi		control	daf-19 RNAi		control	F54F2.9 RNAi		control	ZK546.5 RNAi		control	hsf-1 RNAi		control	let-607 RNAi		control	nhr-84 RNAi		control	xnd-1 RNAi		control	ztf-23 RNAi		control	nhr-146 RNAi
	103	146		103	137		103	123		103	127		103	144		103	144		103	139		103	105		103	141		103	86		103	116
	132	139		132	112		132	119		132	155		132	162		132	117		132	130		132	113		132	120		132	74		132	138
	106	157		106	175		106	169		106	154		106	152		106	121		106	126		106	126		106	125		106	117		106	104
	155	143		155	139		155	148		155	149		155	137		155	87		155	88		155	108		155	134		155	171		155	146
	169	172		169	155		169	134		169	134		169	129		169	111		169	124		169	126		169	123		169	144		169	140
	110	159		110	131		110	142		110	118		110	117		110	85		110	114		110	120		110	109		110	146		110	114
	133	225		133	130		133	161		133	129		133	133		133	107		133	96		133	135		133	116		133	126		133	144
	125	191		125	129		125	128		125	128		125	150		125	97		125	112		125	171		125	128		125	132		125	94
Mean	129.125	166.5		129.125	138.5		129.125	140.5		129.125	136.75		129.125	140.5		129.125	108.625		129.125	116.125		129.125	125.5		129.125	124.5		129.125	124.5		129.125	124.5
	136	80		136	148		135	155		128	94		135	156		132	118		123	130		106	111		141	103		141	83		120	111
	112	177		112	113		130	166		103	146		130	191		116	102		90	85		124	71		133	93		133	99		139	127
	178	180		178	153		130	136		104	113		130	140		122	98		111	88		81	69		109	106		109	106		146	104
	137	118		137	159		125	122		113	98		125	163		95	70		110	100		114	81		129	64		129	116		155	139
	110	126		110	96		131	121		111	124		131	168		108	100		92	94		75	70		121	121		121	124		109	112
	114	119		114	164		103	149		75	125		103	164		142	111		87	63		82	73		126	99		126	129		134	112
	119	161		119	122		100	123		101	139		100	103		193	94		124	90		103	83		129	70		129	123		125	101
	92	145		92	118		127	135		107	134		127	141		88	86		121	113		106	93		117	94		117	121		141	135
Mean	124.75	138.25		124.75	134.125		122.625	138.375		105.25	121.625		122.625	153.25		124.5	97.375		107.25	95.375		98.875	81.375		125.625	93.75		125.625	112.625		133.625	117.625
	141	130		141	65		141	145		141	104		141	160		141	138		141	133		141	157		141	117		141	117		94	96
	124	146		124	137		124	103		124	57		124	186		124	147		124	104		124	131		124	126		124	129		101	141
	148	102		148	113		148	157		148	132		148	177		148	150		148	190		148	151		148	126		148	126		111	84
	127	136		127	97		127	112		127	101		127	141		127	118		127	170		127	81		127	129		127	115		113	139
	121	121		121	104		121	130		121	132		121	154		121	114		121	125		121	125		121	123		121	132		101	137
	110	167		110	128		110	126		110	107		110	144		110	134		110	120		110	112		110	133		110	154		116	113
	151	144		151	100		151	108		151	76		151	97		151	138		151	116		151	131		151	111		151	138		111	104
		149			104			139			89			108			135			143			108			118			124		122	142
Mean	131.714	136.875		131.714	106		131.714	127.5		131.714	99.75		131.714	145.875		131.714	134.25		131.714	137.625		131.714	124.5		131.714	122.875		131.714	129.375		108.625	119.5

## Sheet: Figure 2F
Proliferation rates of C. elegans germ lines after RNAi using 3xflag::sygl-1; sun-1p::rde-1; rde-1(mkc36) strain
		Control	C02F5.12 RNAi	C30G4.4 RNAi	daf-19 RNAi	F54F2.9 RNAi	ZK546.5 RNAi	hsf-1 RNAi	let-607 RNAi	nhr-84 RNAi	nhr-146 RNAi	ztf-23 RNAi	xnd-1 RNAi
Average number of EdU+ nuclei after 4 hrs of EdU labeling	experiment 1	356.6	344.1	383.4	351.4	356.9	392.6	339.4	283.3	346.8	339.4	367.6	-
	experiment 2	331.7	330.5	366.9	353.8	353.1	388.6	298.4	268.8	365.8	343	348.6	306.6
	experiment 3	337.8	307.8	364.3	329.7	330.4	366.1	302.6	264.1	336.9	309.5	320.4	306.2
	experiment 4	353.6	-	-	-	-	-	-	-	-	-	-	318.5
Average number of EdU+ nuclei after 10 hrs of EdU labeling	experiment 1	506.3	535.8	500.9	520.4	487.2	617.8	498.2	428.2	474.3	458.5	480.3	-
	experiment 2	469.2	485	495.2	533.8	479.3	561.6	507.2	387.1	503.6	463.4	522.4	438.6
	experiment 3	471.2	500.9	491.5	501.1	519.9	570.2	454.8	378.3	485.5	495.7	503.6	542
	experiment 4	468.3	-	-	-	-	-	-	-	-	-	-	468.3
Proliferation rate	experiment 1	24.95	31.95	19.5833	28.1667	21.7167	37.5333	26.4667	24.15	21.25	19.85	18.7833	-
	experiment 2	22.9167	25.75	21.3833	30	21.0333	28.8333	34.8	19.7167	22.9667	20.0667	28.9667	22
	experiment 3	22.2333	32.1833	21.2	28.5667	31.5833	34.0167	25.3667	19.0333	24.7667	31.0333	30.5333	39.3
	experiment 4	19.1167	-	-	-	-	-	-	-	-	-	-	24.9667
Mean		23.3667	29.9611	20.7222	28.9111	24.7778	33.4611	28.8778	20.9667	22.9944	23.65	26.0944	28.7556
Quantification of EdU+ nuclei number of 3xflag::sygl-1; sun-1p::rde-1; rde-1(mkc36) one-day adults.
		Control	C02F5.12 RNAi	C30G4.4 RNAi	daf-19 RNAi	F54F2.9 RNAi	ZK546.5 RNAi	hsf-1 RNAi	let-607 RNAi	nhr-84 RNAi	nhr-146 RNAi	ztf-23 RNAi	xnd-1 RNAi
	Experiment 1, 4 hours of EdU labeling	374	312	331	360	415	350	304	288	350	258	422
		362	279	370	302	295	397	306	248	357	310	357
		342	331	379	263	386	375	363	274	321	341	351
		358	359	461	339	345	391	382	280	364	390	339
		362	369	376	354	325	369	376	338	311	439	383
		322	377	379	392	366	379	370	250	390	343	328
		358	372	330	370	396	427	313	317	368	346	403
		339	378	432	411	320	426	332	313	269	340	365
		330	290	463	367	363	419	309	279	298	332	360
		419	364	313	356	358			246	440	295
			354
			344
	Mean	356.6	344.083	383.4	351.4	356.9	392.556	339.444	283.3	346.8	339.4	367.556
		Control	C02F5.12 RNAi	C30G4.4 RNAi	daf-19 RNAi	F54F2.9 RNAi	ZK546.5 RNAi	hsf-1 RNAi	let-607 RNAi	nhr-84 RNAi	nhr-146 RNAi	ztf-23 RNAi	xnd-1 RNAi
	Experiment 1, 10 hours of EdU labeling	241	511	590	519	460	663	478	406	422	509	463
		226	522	477	533	515	635	485	469	434	465	520
		248	567	478	603	460	541	491	473	464	499	456
		250	563	474	488	454	696	497	434	452	514	474
		214	535	451	475	469	626	534	516	464	459	550
		214	553	429	516	485	638	459	383	461	381	449
		259	514	511	574	534	639	499	442	484	381	487
		228	514	527	528	506	589	516	398	510	443	448
		324	557	535	448	465	626	478	407	640	444	513
		305	522	537		524	525	545	354	412	490	443
	Mean	250.9	535.8	500.9	520.444	487.2	617.8	498.2	428.2	474.3	458.5	480.3
		Control	C02F5.12 RNAi	C30G4.4 RNAi	daf-19 RNAi	F54F2.9 RNAi	ZK546.5 RNAi	hsf-1 RNAi	let-607 RNAi	nhr-84 RNAi	nhr-146 RNAi	ztf-23 RNAi	xnd-1 RNAi
	Experiment 2, 4 hours of EdU labeling	314	285	290	351	348	269	290	255	354	360	329	315
		329	271	359	315	415	371	262	352	336	294	280	302
		291	349	318	312	383	303	343	277	375	276	332	305
		334	295	346	390	357	481	255	244	381	309	392	231
		323	388	439	350	328	400	311	307	343	315	347	377
		352	328	386	321	335	440	274	257	387	358	290	397
		325	325	448	416	333	412	317	231	357	316	406	339
		310	313	419	396	331	357	295	252	369	335	344	272
		426	343	322	392	359	391	321	251	370	423	398	283
		313	408	342	295	342	462	316	262	386	444	368	245
	Mean	331.7	330.5	366.9	353.8	353.1	388.6	298.4	268.8	365.8	343	348.6	306.6
		Control	C02F5.12 RNAi	C30G4.4 RNAi	daf-19 RNAi	F54F2.9 RNAi	ZK546.5 RNAi	hsf-1 RNAi	let-607 RNAi	nhr-84 RNAi	nhr-146 RNAi	ztf-23 RNAi	xnd-1 RNAi
	Experiment 2, 10 hours of EdU labeling	509	503	480	526	527	588	417	428	521	465	532	333
		412	460	489	485	414	573	577	419	537	453	474	466
		551	412	477	511	520	499	475	334	577	530	533	384
		484	463	519	546	459	625	476	357	430	484	500	432
		428	405	470	526	450	560	550	389	494	469	556	531
		418	508	548	512	548	492	513	477	543	389	480	433
		380	475	482	530	494	524	505	377	510	423	573	489
		479	532	513	520	450	698	533	421	531	451	613	432
		559	531	456	569	452	406	455	345	411	470	484	434
		472	561	518	613		651	571	324	482	500	479	452
	mean	469.2	485	495.2	533.8	479.333	561.6	507.2	387.1	503.6	463.4	522.4	438.6
		Control	C02F5.12 RNAi	C30G4.4 RNAi	daf-19 RNAi	F54F2.9 RNAi	ZK546.5 RNAi	hsf-1 RNAi	let-607 RNAi	nhr-84 RNAi	nhr-146 RNAi	ztf-23 RNAi	xnd-1 RNAi
	Experiment 3, 4 hours of EdU labeling	379	319	390	364	366	380	315	196	339	311	359	304
		339	340	327	330	375	407	277	222	399	276	312	283
		289	313	288	331	295	426	323	335	335	330	343	256
		347	270	398	361	406	332	301	222	276	364	306	353
		375	302	346	342	342	339	316	253	328	322	295	308
		295	376	298	289	348	349	256	296	369	332	299	308
		354	286	378	315	283	359	321	308	289	309	353	247
		339	274	416	338	318	401	325	269	346	332	289	292
		358	290	372	307	255	374	301	276	322	286	315	353
		328		349	320	306	309	291		318	325	333	286
		325		440		340	329			354	240		268
		326		369			388			368	287		381
													341
	mean	337.833	307.778	364.25	329.7	330.364	366.083	302.6	264.111	336.917	309.5	320.4	306.154
		Control	C02F5.12 RNAi	C30G4.4 RNAi	daf-19 RNAi	F54F2.9 RNAi	ZK546.5 RNAi	hsf-1 RNAi	let-607 RNAi	nhr-84 RNAi	nhr-146 RNAi	ztf-23 RNAi	xnd-1 RNAi
	Experiment 3, 10 hours of EdU labeling	460	511	469	573	456	619	459	333	425	485	544	547
		495	477	542	521	487	546	483	279	514	457	502	534
		438	545	488	509	542	555	413	457	459	458	608	568
		533	523	446	487	430	580	371	412	567	508	454	504
		470	504	399	486	649	551	460	329	461	597	441	476
		408	526	556	543	457	589	474	412	535	419	473	613
		472	465	480	439	528	591	493	474	471	479	521	562
		471	441	529	541	558	595	499	402	365	533	504	527
		471	470	487	529	586	608	441	475	451	524	546	567
		454	547	502	469	421	468		299	539	497	476	522
		511		509	460	587			347	553		505
					456	538			321			469
	mean	471.182	500.9	491.545	501.083	519.917	570.2	454.778	378.333	485.455	495.7	503.583	542
		Control	C02F5.12 RNAi	C30G4.4 RNAi	daf-19 RNAi	F54F2.9 RNAi	ZK546.5 RNAi	hsf-1 RNAi	let-607 RNAi	nhr-84 RNAi	nhr-146 RNAi	ztf-23 RNAi	xnd-1 RNAi
	Experiment 4, 4 hours of EdU labeling	349											376
		358											288
		397											326
		354											254
		328											330
		347											293
		317											274
		328											350
		404											313
													337
													362
	mean	353.556											318.455
		Control	C02F5.12 RNAi	C30G4.4 RNAi	daf-19 RNAi	F54F2.9 RNAi	ZK546.5 RNAi	hsf-1 RNAi	let-607 RNAi	nhr-84 RNAi	nhr-146 RNAi	ztf-23 RNAi	xnd-1 RNAi
	Experiment 4, 4 hours of EdU labeling	401											428
		522											539
		428											502
		487											504
		401											508
		485											328
		448											504
		417											473
		448											502
		464											439
		420											424
	mean	447.364											468.273

## Sheet: Figure 3A
Quantification of multinucleated germ cells of pie-1p::mCherry::his-58; pie-1p::GFP::PH(PLC1delta1); sun-1p::rde-1; rde-1(mkc36) two-day adults following RNAi from the L1 stage
	control	dmd-7 RNAi	baz-2 RNAi	jun-1 RNAi	mter-4 RNAi	lin-26 RNAi	madf-5 RNAi	nhr-40 RNAi	nhr-114 RNAi	nhr-161 RNAi	unc-62 RNAi
	7	11	17	13	10	16	6	15	13	8	8
	6	9	14	15	16	13	15	10	13	3	13
	4	11	6	15	11	3	15	12	14	12	6
	8	16	24	11	18	12	16	9	13	15	18
	1	10	4	13	7	10	13	8	10	17	15
	12	11	14	12	14	7	18	11	6	4	13
	14	14	22	11	9	8	19	9	12	7	9
	7	8	26	15	10	8	14	11	10	10	3
	6	14	14	9	7	2	14	15	11	6	9
	6	22	9	10	4	7	9	10	9	11	7
	0	8	19	16	19	13	15	5	7	8	11
	6	15	9	2	12	8	8	13	11	9	8
	7	12	18	5	3	7	6	13	11	8	3
	14	8	6	19	7	9	4	15	11	8	8
	15	7	11	5	7	11	12	7	7	11	6
	7	18	4	10	7	13	11	9	15	10	9
	9	12	4	13	5	7	7	8	12	9	8
	4	13	15	16	8	9	9	13	15	9	5
	5	6	9	8	7	13	8	11	9	11	11
	9	5	7	12	10	14	14	11	5	10	13
	8	7	10	11	18	17	15	8	11	7	15
	11	10	9	14	7	13	12	11	15	10	10
	4	16	9	7	8	5	11	12	26	12	18
	9	13	17	9	15	13	11	17	21	12	13
	10	4	17	20	15	6	10	13	13	12	22
	8	13	12	13	10	10	14	6	11	13	18
	8	11	13	11	11	8	7	11	14	11	16
	9	15	1	9	11	11	9	16	22	8	21
	6	12	20	3	9	13	13	11	11	14	5
	9	7	9	10	10	6	11	14	13	9	7
			13		16	13
						12
						11
Total N	30	30	31	30	31	33	30	30	30	30	30
Mean	7.63333	11.2667	12.3226	11.2333	10.3548	9.93939	11.5333	11.1333	12.3667	9.8	10.9333

## Sheet: Figure 3C
Quantification of apoptotic germ cells in two-day adults of pie-1p::mCherry::his-58; pie-1p::GFP::PH(PLC1delta1); sun-1p::rde-1; rde-1(mkc36) strain (wild-type and ced-3(rp190) animals).
	wild type	ced-3(rp190)
	8	0
	7	0
	7	0
	3	0
	4	0
	5	0
	6	0
	4	0
	4	0
	6	0
	4	0
	7	0
	5	0
	5	0
	2	0
	4	0
	3	0
	6	0
	7	0
	5	0
	6	0
	3	0
	1	0
	2	0
	2	0
	2	0
	5	0
	2	0
	4	0
	8	0
Total N	30	30
Mean	4.56667	0

## Sheet: Figure 3D
Quantification of multinucleated germ cells in two-day adults of pie-1p::mCherry::his-58; pie-1p::GFP::PH(PLC1delta1); sun-1p::rde-1; rde-1(mkc36) strain (wild-type and ced-3(rp190) animals).
	wild type	ced-3(rp190)
	7	10
	6	13
	4	15
	8	10
	1	7
	12	3
	14	18
	7	2
	6	6
	6	5
	0	7
	6	8
	7	7
	14	6
	15	17
	7	27
	9	14
	4	17
	5	4
	9	8
	8	15
	11	3
	4	9
	9	9
	10	5
	8	14
	8	16
	9	12
	6	13
	9	25
		10
		4
		15
Total N	30	33
Mean	7.63333	10.7273

## Sheet: Figure 3E
Quantification of multinucleated germ cells in ced-3(rp190), pie-1p::mCherry::his-58; pie-1p::GFP::PH(PLC1delta1); sun-1p::rde-1; rde-1(mkc36) two-day adults
	control	dmd-7 RNAi	baz-2 RNAi	jun-1 RNAi	mter-4 RNAi	lin-26 RNAi	madf-5 RNAi	nhr-40 RNAi	nhr-114 RNAi	nhr-161 RNAi	unc-62 RNAi
	19	14	14	7	11	7	13	18	7	16	16
	12	19	14	9	7	17	20	6	13	8	20
	11	13	10	18	17	11	17	18	15	17	10
	4	12	14	3	13	12	22	8	8	11	16
	6	17	18	12	9	7	16	9	12	15	25
	8	11	11	4	16	10	14	14	13	11	13
	8	22	8	10	7	3	14	12	12	10	5
	6	15	12	12	8	7	17	16	10	8	19
	12	23	14	11	8	13	13	16	10	12	10
	11	18	7	26	9	13	19	11	7	11	12
	7	16	17	9	8	9	19	10	13	12	6
	12	12	8	12	11	9	10	10	9	9	9
	12	19	18	10	21	5	14	9	10	10	7
	6	18	12	11	11	9	7	10	4	12	7
	10	10	16	8	12	12	10	13	8	7	12
	8	8	23	19	13	9	10	11	15	12	11
	5	15	14	12	10	15	22	11	18	14	10
	14	16	6	8	8	9	13	12	12	9	14
	9	10	12	9	4	10	13	5	4	9	13
	5	6	22	11	15	10	13	11	5	12	11
	16	4	16	3	13	11	9	1	15	10	14
	19	10	12	11	10	4	16	15	8	12	11
	20	19	7	9	8	8	17	13	5	6	17
	8	24	13	10	2	5	13	5	10	9	6
	12	15	2	10	2	8	11	5	5	16	5
	14	9	15	8	9	3	10	8	6	13	8
	9	15	9	12	5	12	10	12	6	7	7
	12	8	13	15	11	7	12	9	16	11	8
	9	17	7	8	9	16	12	11	17	15	15
	14	21	21	6	9	3	15	9	17	13	9
Total N	30	30	30	30	30	30	30	30	30	30	30
Mean	10.6	14.5333	12.8333	10.4333	9.86667	9.13333	14.0333	10.6	10.3333	11.2333	11.5333

## Sheet: Figure 3G
Quantification of germline folds in the pachytene region as row of nuclei and confocal micrographs of DAPI and phalloidin staining of sun-1p::rde-1; rde-1(mkc36) one-day adults
	control	dmd-7 RNAi	baz-2 RNAi	jun-1 RNAi	mter-4 RNAi	lin-26 RNAi	madf-5 RNAi	nhr-40 RNAi	nhr-114 RNAi	nhr-161 RNAi	unc-62 RNAi
	2	5	11	4	10	8	1	3	8	4	8
	4	6	9	3	10	8	4	7	2	5	5
	0	12	5	8	4	11	5	9	1	10	3
	4	8	2	3	3	8	8	1	3	8	0
	5	2	2	2	7	11	3	4	3	3	0
	4	10	3	3	8	11	8	7	4	7	4
	5	2	8	3	4	6	3	2	10	6	1
	2	4	2	4	4	8	7	1	13	5	5
	2	3	7	0	10	7	0	2	5	1	0
	3	0	2	4	6	8	4	13	2	4	5
	1	9	1	2	2	9	3	2	4	1	5
	5	1	4	1	7	9	11	8	11	4	2
	0	2	6	2	1	6	2	5	12	8	3
	1	1	1	4	7	7	4	9	9	3	3
	3	6	3	6	3	14	3	8	5	9	6
	8	6	9	7	1	4	5	9	1	2	14
	2	5	9	5	9	10	6	2	7	7	4
	3	6	8	3	8	6	5	1	2	13	4
	7	1	3	3	6	6	2	5	6	6	9
	2	8	0	7	6	7	0	2	9	8	4
	8	7	7	1	2	2	8	3	1	13	5
	1	16	11	2	5	8	7	1	2	10	11
	1	14	1	7	8	6	4	0	14	4	5
	4	5	3	4	7	4	6	0		5	9
	3	8	5		0	5	15			6	2
	0	2	2		4	10	3			2	5
	8	6	9		2	4	0			5
	4	7	5		5	3	0			9
	7	6	10		5	7	3
	2		1			6
	2		2			10
	6					5
	1
	3
	2
	4
Total N	36	29	31	24	29	32	29	24	23	28	26
Mean	3.30556	5.7931	4.87097	3.66667	5.31034	7.3125	4.48276	4.33333	5.82609	6	4.69231

## Sheet: Figure 4A 
Quantification of hatched larvae and dead eggs (brood size) following germline-specific RNAi from the L1 stage
	hatched larvae
	control	repo-1 RNAi	F33H1.4 RNAi	F23B12.7 RNAi	F58G1.2 RNAi	tbp-1 RNAi	vep-1 RNAi	znf-622 RNAi	cdc-5L RNAi
	321	9	0	0	63	0	0	0	0
	307	0	70	4	0	0	0	0	0
	236	0	1	58	0	0	0	0	0
	356	3	2	13	0	0	0	0	0
	314	9	2	14	0	0	0	0	0
	333	3	0	0	17	0	0	0	0
	331	0	0	0	0	0	0	0	0
	368	9	0	60	0	0	0	0	0
	382	2	0	0	0	0	0	0	0
	310	1	0	0	0	0	0	0	0
	344	1	0	7	99	0	0	0	0
	284	4	0	79	112	0	0	0	0
	335	199	0	32	69	0	0	0	0
	378	198	9	53	0	0	0	0	0
	414	149	20	139	0	0	0	0	0
	244	205	255		1	0	0	0	0
		97	61		9	0	0	0	0
		87	63				0		0
Total N	16	18	18	15	17	17	18	17	18
Mean	328.562	54.2222	26.8333	30.6	21.7647	0	0	0	0
	dead eggs
	control	repo-1 RNAi	F33H1.4 RNAi	F23B12.7 RNAi	F58G1.2 RNAi	tbp-1 RNAi	vep-1 RNAi	znf-622 RNAi	cdc-5L RNAi
	1	153	4	0	2	0	0	0	0
	2	394	68	0	0	0	0	0	0
	1	25	8	0	0	0	0	0	0
	2	212	10	1	0	0	0	0	0
	0	58	13	5	0	0	0	0	0
	1	303	16	2	12	0	0	0	0
	1	367	0	0	0	0	0	0	0
	1	56	0	6	0	0	0	0	0
	0	304	0	0	0	0	0	1	0
	1	242	0	0	0	0	0	0	0
	3	98	3	22	2	0	0	0	0
	0	175	0	23	14	0	0	0	0
	8	72	5	25	9	0	0	0	0
	4	178	41	49	0	0	0	0	0
	1	65	47	54	6	0	0	0	0
	16	78	6		1	0	0	0	0
		316	104		3	0	0	0	0
		67	96				0		0
Total N	16	18	18	15	17	17	18	17	18
Mean	2.625	175.722	23.3889	12.4667	2.88235	0	0	0.0588235	0

[truncated: 17 more sheets: Figure 4C, Figure 4E, Figure 4F, Figure 4G, Figure 4H, Figure 4I, Figure 4J, Figure S2A, Figure S2B, Figure S4AB, Figure S4C, Figure S5A, Figure S5C, Figure S5D, Figure S6A, Figure S6B, Figure S6C]
