# Supplementary material for: A Transcription Factor Functional Atlas of Germline Development
Source: Research Square preprint supplement (doi:10.21203/rs.3.rs-3880498/v1), 2024-01-26
Supplement: Supplementary file 8 [file a2aacfbea48d7bdd3f711d0e.xlsx]

## Sheet: Sheet1
Gene.Public.Name	WormBase Gene ID	Sequence Name	Source
tag-146	WBGene00006492	C27A12.3	Ahringer RNAi library
F36D1.1	WBGene00009461	F36D1.1	Ahringer RNAi library
F45C12.2	WBGene00018433	F45C12.2	Ahringer RNAi library
ZK686.4	WBGene00022794	ZK686.4	Ahringer RNAi library
sup-35	WBGene00012976	Y48A6C.3	Ahringer RNAi library
tbx-36	WBGene00006555	ZK829.5	Ahringer RNAi library
efl-3	WBGene00009899	F49E12.6	Ahringer RNAi library
Y52B11A.9	WBGene00013128	Y52B11A.9	Ahringer RNAi library
F26F4.8	WBGene00005011	F26F4.8	Ahringer RNAi library
pqn-21	WBGene00004111	C37A2.5	Ahringer RNAi library
hnd-1	WBGene00001981	C44C10.8	Ahringer RNAi library
cdc-14	WBGene00000383	C17G10.4	Ahringer RNAi library
madf-7	WBGene00015502	C06A5.4	Ahringer RNAi library
ztf-12	WBGene00006342	C01B7.1	Ahringer RNAi library
C18C4.5	WBGene00015966	C18C4.5	Ahringer RNAi library
cdc-5L	WBGene00008386	D1081.8	Ahringer RNAi library
snpc-4	WBGene00001568	F32H2.1	Ahringer RNAi library
daf-16	WBGene00000912	R13H8.1	Ahringer RNAi library
sptf-3	WBGene00012735	Y40B1A.4	Ahringer RNAi library
aptf-3	WBGene00009203	F28C6.2	Ahringer RNAi library
pal-1	WBGene00003912	C38D4.6	Ahringer RNAi library
nfx-1	WBGene00007048	C16A3.7	Ahringer RNAi library
tbx-9	WBGene00006546	T07C4.6	Ahringer RNAi library
hlh-30	WBGene00020930	W02C12.3	Ahringer RNAi library
nhr-97	WBGene00003687	H27C11.1	Ahringer RNAi library
spe-44	WBGene00007732	C25G4.4	Ahringer RNAi library
ceh-49	WBGene00017538	F17A9.6	Ahringer RNAi library
hif-1	WBGene00001851	F38A6.3	Ahringer RNAi library
ceh-21	WBGene00000444	T26C11.6	Ahringer RNAi library
ham-1	WBGene00001820	F53B2.6	Ahringer RNAi library
lag-1	WBGene00002245	K08B4.1	Ahringer RNAi library
egl-44	WBGene00001208	F28B12.2	Ahringer RNAi library
ets-4	WBGene00017687	F22A3.1	Ahringer RNAi library
ztf-3	WBGene00016905	C53D5.4	Nuria Flames
ZC123.3	WBGene00022518	ZC123.3	Nuria Flames
F54A5.1	WBGene00018786	F54A5.1	Nuria Flames
ubxn-1	WBGene00017733	F23C8.4	Nuria Flames
nhr-64	WBGene00003654	C45E1.1	Nuria Flames
zip-4	WBGene00021552	Y44E3B.1	Nuria Flames
F57C9.4	WBGene00019011	F57C9.4	Nuria Flames
vep-1	WBGene00015091	B0261.1	Nuria Flames
let-526	WBGene00002717	C01G8.9	Nuria Flames
cey-2	WBGene00000473	F46F11.2	Nuria Flames
nhr-2	WBGene00003601	C32F10.6	Nuria Flames
C27A12.2	WBGene00016154	C27A12.2	Nuria Flames
let-607	WBGene00002783	F57B10.1	Nuria Flames
ztf-4	WBGene00020399	T10B11.3	Nuria Flames
nhr-23	WBGene00003622	C01H6.5	Nuria Flames
ztf-15	WBGene00011066	R06C7.9	Nuria Flames
pbrm-1	WBGene00007042	C26C6.1	Nuria Flames
D2030.7	WBGene00008417	D2030.7	Nuria Flames
nhr-49	WBGene00003639	K10C3.6	Nuria Flames
lsl-1	WBGene00009937	F52F12.4	Nuria Flames
aha-1	WBGene00000095	C25A1.11	Nuria Flames
lin-11	WBGene00003000	ZC247.3	Nuria Flames
tag-68	WBGene00006445	F37D6.6	Nuria Flames
Y53H1A.2	WBGene00013178	Y53H1A.2	Nuria Flames
hsf-1	WBGene00002004	Y53C10A.12	Nuria Flames
HMG-20	WBGene00012209	W02D9.3	Nuria Flames
Y18D10A.1	WBGene00012474	Y18D10A.1	Nuria Flames
F39B2.1	WBGene00009553	F39B2.1	Nuria Flames
K11D2.4	WBGene00010770	K11D2.4	Nuria Flames
C01B12.2	WBGene00015285	C01B12.2	Nuria Flames
F42G2.6	WBGene00018355	F42G2.6	Nuria Flames
sea-1	WBGene00004750	F19B10.9	Nuria Flames
C46E10.9	WBGene00016713	C46E10.9	Nuria Flames
sea-2	WBGene00004751	K10G6.3	Nuria Flames
H20J04.2	WBGene00019217	H20J04.2	Nuria Flames
hmg-11	WBGene00001976	T05A7.4	Nuria Flames
ZK546.5	WBGene00022762	ZK546.5	Nuria Flames
C27D6.4	WBGene00016162	C27D6.4	Nuria Flames
egl-27	WBGene00001194	C04A2.3	Nuria Flames
ada-2	WBGene00017967	F32A5.1	Nuria Flames
lin-26	WBGene00003012	F18A1.2	Nuria Flames
lir-1	WBGene00003044	F18A1.3	Nuria Flames
lir-2	WBGene00003045	F18A1.4	Nuria Flames
T22C8.3	WBGene00011924	T22C8.3	Nuria Flames
zfp-2	WBGene00009448	F35H8.3	Nuria Flames
nhr-19	WBGene00003618	E02H1.7	Nuria Flames
die-1	WBGene00000995	C18D1.1	Nuria Flames
daf-19	WBGene00000914	F33H1.1	Nuria Flames
F33H1.4	WBGene00009365	F33H1.4	Nuria Flames
ref-1	WBGene00004334	T01E8.2	Nuria Flames
ztf-27	WBGene00011661	T09F3.1	Nuria Flames
cey-1	WBGene00000472	F33A8.3	Nuria Flames
lir-3	WBGene00003046	F37H8.1	Nuria Flames
hmg-12	WBGene00001977	Y17G7A.1	Nuria Flames
Y38E10A.6	WBGene00012584	Y38E10A.6	Nuria Flames
Y48E1B.7	WBGene00013006	Y48E1B.7	Nuria Flames
mcd-1	WBGene00013096	Y51H1A.6	Nuria Flames
mxl-2	WBGene00003510	F40G9.11	Nuria Flames
zip-2	WBGene00019327	K02F3.4	Nuria Flames
ztf-18	WBGene00020763	T24C4.7	Nuria Flames
C46F11.3	WBGene00008118	C46F11.3	Nuria Flames
Y66A7A.5	WBGene00013425	Y66A7A.5	Nuria Flames
Y79H2A.3	WBGene00013580	Y79H2A.3	Nuria Flames
tbx-33	WBGene00006552	Y66A7A.8	Nuria Flames
xbp-1	WBGene00006959	R74.3	Nuria Flames
R10E4.11	WBGene00011206	R10E4.11	Nuria Flames
T23F11.4	WBGene00011956	T23F11.4	Nuria Flames
mel-28	WBGene00003210	C38D4.3	Nuria Flames
C38D4.7	WBGene00008007	C38D4.7	Nuria Flames
B0336.7	WBGene00015147	B0336.7	Nuria Flames
tbx-11	WBGene00006547	F40H6.4	Nuria Flames
C05D10.1	WBGene00015477	C05D10.1	Nuria Flames
hmg-1.2	WBGene00001972	F47D12.4	Nuria Flames
znf-622	WBGene00015809	C16A3.4	Nuria Flames
T26A5.8	WBGene00020823	T26A5.8	Nuria Flames
ceh-20	WBGene00000443	F31E3.1	Nuria Flames
nhr-10	WBGene00003609	B0280.8	Nuria Flames
lin-39	WBGene00003024	C07H6.7	Nuria Flames
lin-36	WBGene00003021	F44B9.6	Nuria Flames
gei-8	WBGene00001565	C14B9.6	Nuria Flames
F54F2.9	WBGene00018836	F54F2.9	Nuria Flames
F44E2.7	WBGene00018420	F44E2.7	Nuria Flames
T23G5.6	WBGene00011964	T23G5.6	Nuria Flames
hlh-11	WBGene00001955	F58A4.7	Nuria Flames
athp-1	WBGene00008081	C44B9.4	Nuria Flames
tra-1	WBGene00006604	Y47D3A.6	Nuria Flames
sbp-1	WBGene00004735	Y47D3B.7	Nuria Flames
bed-2	WBGene00012943	Y47D3B.9	Nuria Flames
znf-593	WBGene00013236	Y56A3A.18	Nuria Flames
dro-1	WBGene00001092	F53A2.5	Nuria Flames
dnj-17	WBGene00001035	T03F6.2	Nuria Flames
Y71H2AM.17	WBGene00022182	Y71H2AM.17	Nuria Flames
R02D3.7	WBGene00019824	R02D3.7	Nuria Flames
nhr-76	WBGene00015497	C05G6.1	Nuria Flames
Y37E11B.1	WBGene00021374	Y37E11B.1	Nuria Flames
nhr-104	WBGene00003694	R11E3.5	Nuria Flames
dnj-11	WBGene00001029	F38A5.13	Nuria Flames
hmg-5	WBGene00001975	F45E4.9	Nuria Flames
nhr-66	WBGene00003656	T09A12.4	Nuria Flames
ZK185.1	WBGene00022681	ZK185.1	Nuria Flames
D1046.2	WBGene00008363	D1046.2	Nuria Flames
ZNF-706	WBGene00007223	C01F6.9	Nuria Flames
flh-1	WBGene00012435	Y11D7A.12	Nuria Flames
flh-3	WBGene00012436	Y11D7A.13	Nuria Flames
nhr-100	WBGene00003690	C28D4.1	Nuria Flames
nhr-4	WBGene00003603	F32B6.1	Nuria Flames
him-8	WBGene00001867	T07G12.12	Nuria Flames
miz-1	WBGene00011259	R13.4	Nuria Flames
B0035.1	WBGene00007105	B0035.1	Nuria Flames
mbf-1	WBGene00003148	H21P03.1	Nuria Flames
mep-1	WBGene00003218	M04B2.1	Nuria Flames
dmd-6	WBGene00007058	F13G11.1	Nuria Flames
madf-1	WBGene00021942	Y55F3BR.5	Nuria Flames
Y67D8A.3	WBGene00022060	Y67D8A.3	Nuria Flames
nhr-190	WBGene00018622	F48G7.11	Nuria Flames
nhr-256	WBGene00022805	ZK697.2	Nuria Flames
ztf-28	WBGene00018099	F36F12.8	Nuria Flames
nhr-13	WBGene00003612	Y5H2B.2	Nuria Flames
nhr-182	WBGene00018265	F41B5.9	Nuria Flames
F37B4.10	WBGene00018140	F37B4.10	Nuria Flames
lin-40	WBGene00003025	T27C4.4	Nuria Flames
unc-62	WBGene00006796	T28F12.2	Nuria Flames
fos-1	WBGene00001345	F29G9.4	Nuria Flames
F09G2.9	WBGene00017317	F09G2.9	Nuria Flames
spr-1	WBGene00005006	D1014.8	Nuria Flames
W02D7.6	WBGene00020942	W02D7.6	Nuria Flames
mxl-1	WBGene00003509	T19B10.11	Nuria Flames
ceh-32	WBGene00000453	W05E10.3	Nuria Flames
nhr-154	WBGene00007547	C13C4.2	Nuria Flames
C26E1.3	WBGene00007749	C26E1.3	Nuria Flames
somi-1	WBGene00010868	M04G12.4	Nuria Flames
eea-1	WBGene00011696	T10G3.5	Nuria Flames
ZC376.4	WBGene00013876	ZC376.4	Nuria Flames
F23B12.7	WBGene00009084	F23B12.7	Nuria Flames
pzf-1	WBGene00011505	T05G11.1	Nuria Flames
lsy-27	WBGene00009834	F47H4.1	Nuria Flames
nhr-95	WBGene00003685	Y39B6A.17	Nuria Flames
tra-4	WBGene00018740	F53B3.1	Nuria Flames
K10B3.5	WBGene00019611	K10B3.5	Nuria Flames
nhr-35	WBGene00003628	C07A12.3	Nuria Flames
spr-3	WBGene00005008	C07A12.5	Nuria Flames
F21A10.2	WBGene00008999	F21A10.2	Nuria Flames
sex-1	WBGene00004786	F44A6.2	Nuria Flames
nfya-1	WBGene00011614	T08D10.1	Nuria Flames
ceh-40	WBGene00000461	F17A2.5	Nuria Flames
atf-6	WBGene00000222	F45E6.2	Nuria Flames
nhr-17	WBGene00003616	C02B4.2	Nuria Flames
K09A11.1	WBGene00010704	K09A11.1	Nuria Flames
nhr-71	WBGene00003661	K11E4.5	Nuria Flames
dve-1	WBGene00022861	ZK1193.5	Nuria Flames
atf-5	WBGene00000221	T04C10.4	Nuria Flames
T27A8.2	WBGene00012074	T27A8.2	Nuria Flames
sdc-1	WBGene00004745	F52E10.1	Nuria Flames
T20F7.1	WBGene00020630	T20F7.1	Nuria Flames
ztf-13	WBGene00018704	F52E4.8	Nuria Flames
lin-15B	WBGene00023497	ZK662.4	Nuria Flames
ZC204.2	WBGene00022554	ZC204.2	Nuria Flames
gfl-1	WBGene00001585	M04B2.3	Nuria Flames
mdl-1	WBGene00003163	R03E9.1	Nuria Flames
nhr-21	WBGene00003620	F21D12.1	Nuria Flames
lin-54	WBGene00003037	JC8.6	Nuria Flames
zip-1	WBGene00006986	Y75B8A.35	Nuria Flames
lmn-1	WBGene00003052	DY3.2	Nuria Flames
hmg-1.1	WBGene00001971	Y48B6A.14	Nuria Flames
F56D1.1	WBGene00018959	F56D1.1	Nuria Flames
him-17	WBGene00001874	T09E8.2	Nuria Flames
F15A4.10	WBGene00008844	F15A4.10	Nuria Flames
nhr-69	WBGene00003659	T23H4.2	Nuria Flames
nhr-102	WBGene00003692	T06C12.6	Nuria Flames
taf-11.3	WBGene00006395	F43D9.5	Nuria Flames
crh-1	WBGene00000793	Y41C4A.4	Nuria Flames
tbp-1	WBGene00006542	T20B12.2	Nuria Flames
nfyb-1	WBGene00021132	W10D9.4	Nuria Flames
ztf-7	WBGene00009772	F46B6.7	Nuria Flames
atf-7	WBGene00000223	C07G2.2	Nuria Flames
cid-1	WBGene00019629	K10D2.3	Nuria Flames
nhr-20	WBGene00003619	F43C1.4	Nuria Flames
isw-1	WBGene00002169	F37A4.8	Nuria Flames
lin-28	WBGene00003014	F02E9.2	Nuria Flames
madf-6	WBGene00016930	C54G6.1	Nuria Flames
rcor-1	WBGene00022278	Y74C9A.4	Nuria Flames
row-1	WBGene00009508	F37D6.2	Nuria Flames
spr-4	WBGene00005009	C09H6.1	Nuria Flames
Y48C3A.12	WBGene00012994	Y48C3A.12	Nuria Flames
ztf-22	WBGene00012988	Y48C3A.4	Nuria Flames
T07F8.4	WBGene00020320	T07F8.4	Nuria Flames
F58G1.2	WBGene00010264	F58G1.2	Nuria Flames
ztf-17	WBGene00011639	T09A5.12	Nuria Flames
efl-2	WBGene00001162	Y48C3A.17	Nuria Flames
F21D5.4	WBGene00009009	F21D5.4	Nuria Flames
rabs-5	WBGene00021538	Y42H9AR.3	Nuria Flames
athp-3	WBGene00013799	Y116A8C.22	Nuria Flames
nhr-34	WBGene00003627	F58G6.5	Nuria Flames
nhr-46	WBGene00003636	C45E5.6	Nuria Flames
sma-3	WBGene00004857	R13F6.9	Nuria Flames
nhr-132	WBGene00003722	R11G11.1	Nuria Flames
nhr-181	WBGene00018189	F38H12.3	Nuria Flames
nhr-84	WBGene00003674	T06C12.7	Nuria Flames
nhr-243	WBGene00013584	Y80D3A.4	Nuria Flames
C50F4.12	WBGene00008236	C50F4.12	Nuria Flames
nhr-228	WBGene00020852	T27B7.6	Nuria Flames
ekl-4	WBGene00013676	Y105E8A.17	Nuria Flames
nhr-70	WBGene00003660	Y51A2D.17	Nuria Flames
nhr-12	WBGene00003611	R04B5.4	Nuria Flames
atfs-1	WBGene00013878	ZC376.7	Nuria Flames
swsn-1	WBGene00004203	Y113G7B.23	Nuria Flames
unc-98	WBGene00006827	F08C6.7	Nuria Flames
nhr-28	WBGene00003624	C11G6.4	Nuria Flames
nhr-1	WBGene00003600	R09G11.2	Nuria Flames
nhr-15	WBGene00003614	F33E11.1	Nuria Flames
ztf-8	WBGene00022598	ZC395.8	Nuria Flames
nhr-40	WBGene00003630	T03G6.2	Nuria Flames
C46C2.7	WBGene00045078	C46C2.7	Nuria Flames
arid-1	WBGene00044689	Y108G3AL.7	Nuria Flames
swsn-7	WBGene00007433	C08B11.3	Nuria Flames
hlh-14	WBGene00001958	C18A3.8	Nuria Flames
F41H10.4	WBGene00018317	F41H10.4	Nuria Flames
cebp-2	WBGene00016754	C48E7.11	Nuria Flames
drap-1	WBGene00009584	F40F9.7	Nuria Flames
ceh-99	WBGene00044032	T21B4.17	Nuria Flames
ceh-92	WBGene00013431	Y66D12A.5	Nuria Flames
nsy-7	WBGene00044508	C18F3.4	Nuria Flames
ZC247.1	WBGene00013859	ZC247.1	Nuria Flames
madf-11	WBGene00015468	C05D2.6	Nuria Flames
madf-3	WBGene00019218	H20J04.3	Nuria Flames
madf-5	WBGene00007242	C01G12.1	Nuria Flames
flt-1/baz-2	WBGene00001470	ZK783.4	Nuria Flames
K11D2.5	WBGene00010771	K11D2.5	Nuria Flames
chd-7	WBGene00007053	T04D1.4	Nuria Flames
R151.8	WBGene00020111	R151.8	Nuria Flames
myrf-1	WBGene00004134	F59B10.1	Nuria Flames
F19F10.9	WBGene00017605	F19F10.9	Nuria Flames
tbx-2	WBGene00006543	F21H11.3	Nuria Flames
tlf-1	WBGene00006577	F39H11.2	Nuria Flames
C30G4.4	WBGene00016269	C30G4.4	Nuria Flames
wrm-1	WBGene00006943	B0336.1	Nuria Flames
hmp-2	WBGene00001979	K05C4.6	Nuria Flames
C02F5.12	WBGene00015352	C02F5.12	Nuria Flames
K11D12.12	WBGene00019651	K11D12.12	Nuria Flames
W04D2.4	WBGene00012243	W04D2.4	Nuria Flames
Y37F4.6	WBGene00021387	Y37F4.6	Nuria Flames
K04C1.3	WBGene00010553	K04C1.3	Nuria Flames
lin-13	WBGene00003002	C03B8.4	Nuria Flames
slr-2	WBGene00013350	Y59A8B.13	Nuria Flames
Y67H2A.10	WBGene00013465	Y67H2A.10	Nuria Flames
lst-5	WBGene00016890	C52E12.6	Nuria Flames
Y111B2A.10	WBGene00013734	Y111B2A.10	Nuria Flames
sma-9	WBGene00004862	T05A10.1	Nuria Flames
egrh-3	WBGene00044651	Y94H6A.11	Nuria Flames
ztf-9	WBGene00013966	ZK287.6	Nuria Flames
dmd-7	WBGene00019521	K08B12.2	Nuria Flames
flh-2	WBGene00016138	C26E6.2	Nuria Flames
nhr-42	WBGene00003632	C33G8.6	Nuria Flames
R144.3	WBGene00020093	R144.3	Nuria Flames
nhr-161	WBGene00016364	C33G8.7	Nuria Flames
nhr-122	WBGene00003712	Y41D4B.9	Nuria Flames
nhr-138	WBGene00003728	C28D4.9	Nuria Flames
nhr-61	WBGene00003651	W01D2.2	Nuria Flames
nhr-86	WBGene00003676	Y40B10A.8	Nuria Flames
nhr-114	WBGene00003704	Y45G5AM.1	Nuria Flames
nhr-48	WBGene00003638	ZK662.3	Nuria Flames
nhr-146	WBGene00045255	Y41D4B.27	Nuria Flames
mml-1	WBGene00003378	T20B12.6	Nuria Flames
nhr-274	WBGene00021522	Y41D4B.21	Nuria Flames
ztf-20	WBGene00012702	Y39B6A.46	Nuria Flames
ztf-11	WBGene00009939	F52F12.6	Nuria Flames
egrh-2	WBGene00043705	Y55F3AM.7	Nuria Flames
dpy-27	WBGene00001086	R13G10.1	Nuria Flames
lsy-2	WBGene00003087	F49H12.1	Nuria Flames
nhr-22	WBGene00003621	K06A1.4	Nuria Flames
elt-6	WBGene00001253	F52C12.5	Nuria Flames
elt-7	WBGene00015981	C18G1.2	Nuria Flames
ztf-25	WBGene00012405	Y6G8.3	Targeted by lsy-27 RNAi
F10E7.11	WBGene00017352	F10E7.11	Targeted by T07F8.4
K09H9.7	WBGene00019598	K09H9.7	This project
cey-3	WBGene00000474	M01E11.5	This project
hmg-3	WBGene00001973	C32F10.5	This project
cep-1	WBGene00000467	F52B5.5	This project
nfya-2	WBGene00043056	Y53H1A.5	This project
ztf-23	WBGene00021846	Y54E10BR.8	This project
nfyc-1	WBGene00017742	F23F1.1	This project
Y57A10A.31	WBGene00013270	Y57A10A.31	This project
Y53F4B.3	WBGene00013150	Y53F4B.3	This project
xnd-1	WBGene00001514	C05D2.5	This project
hmg-4	WBGene00001974	T20B12.8	This project
R05D3.3	WBGene00019878	R05D3.3	This project
ztf-1	WBGene00018833	F54F2.5	This project
Y56A3A.28	WBGene00013240	Y56A3A.28	This project
W08E12.1	WBGene00021082	W08E12.1	This project
nfi-1	WBGene00003592	ZK1290.4	This project
elt-1	WBGene00001249	W09C2.1	This project
Y5F2A.4	WBGene00012385	Y5F2A.4	This project
dpl-1	WBGene00001061	T23G7.1	This project
hlh-2	WBGene00001949	M05B5.5	This project
ceh-38	WBGene00000459	F22D3.1	This project
fkh-4	WBGene00001436	C29F7.5	This project
ceh-93	WBGene00019864	R04A9.5	This project
fkh-9	WBGene00001441	K03C7.2	This project
cey-4	WBGene00000475	Y39A1C.3	This project
efl-1	WBGene00001161	Y102A5C.18	This project
bed-3	WBGene00009133	F25H8.6	This project
eor-1	WBGene00001324	R11E3.6	This project
ceh-44	WBGene00000464	Y54F10AM.4	This project
Y73E7A.1	WBGene00022268	Y73E7A.1	This project
znf-598	WBGene00016888	C52E12.1	This project
F52B5.7	WBGene00009923	Y55F3AM.7	This project
mex-6	WBGene00003231	AH6.5	This project
saeg-1	WBGene00010012	F53H10.2	This project
znf-236	WBGene00021689	Y48G8AL.10	This project
bed-1	WBGene00012674	Y39B6A.12	This project
ceh-83	WBGene00018446	F45C12.15	This project
nhr-32	WBGene00003626	K08H2.8	This project
C06A6.2	WBGene00015507	C06A6.2	This project
zim-1	WBGene00011597	T07G12.6	This project
egrh-1	WBGene00007772	C27C12.2	This project
daf-3	WBGene00000899	F25E2.5	This project
attf-5	WBGene00020214	T04G9.1	This project
C04F5.9	WBGene00015451	C04F5.9	This project
nhr-47	WBGene00003637	C24G6.4	This project
repo-1	WBGene00008683	F11A10.2	This project
rbr-2	WBGene00004319	ZK593.4	This project
zim-2	WBGene00011600	T07G12.10	This project
zim-3	WBGene00011601	T07G12.11	This project
pop-1	WBGene00004077	W10C8.2	Vidal RNAi library
camt-1	WBGene00020251	T05C1.4	Vidal RNAi library
jun-1	WBGene00012005	T24H10.7	Vidal RNAi library
egl-18	WBGene00001186	F55A8.1	Vidal RNAi library
aptf-2	WBGene00013383	Y62E10A.17	Vidal RNAi library
fkh-3	WBGene00001435	C29F7.4	Vidal RNAi library
elf-1	WBGene00016029	C24A1.2	Vidal RNAi library
ceh-39	WBGene00000460	T26C11.7	Vidal RNAi library
