# Supplementary material for: A Transcription Factor Functional Atlas of Germline Development
Source: Research Square preprint supplement (doi:10.21203/rs.3.rs-3880498/v1), 2024-01-26
Supplement: Supplementary file 9 [file a2d53dc1356e0647996768db.xlsx]

## Sheet: 156 TFs 
This datasets include 156 genes causing significant changes in the distal analysis (≥20% at any region) or proximal analysis (≥4 germ lines)
		Distal analysis (increase, decrease, by % of control)					Proximal analysis
Gene Public Name	WormBase Gene ID	PZ	TZ	SYGL-1+	PH3+	Mitotic index	Small germline	Rachis	Abnormal meiotic progression	Incomplete spermatogenesis	Multinucleated germ lines	Multinucleated cells	Apoptosis	Changes in single array oocyte, % of control	Changes in budded oocyte, % of control	Delayed/No expansion at turn	Vesiculation	Mislocated sperm	Other phenotypes
ceh-40	WBGene00000461		26 (p=0.0047)				0	0	0	2	2	2xbi	0	-20		0	0	4
hmg-3	WBGene00001973	18 (p<0.0001)	33 (p=0.0009)	14 (p=0.0353)		88 (p=0.0095)	4	-5	4	0	0	0	1			0	0	3	2/8 abrupt expansion
nhr-40	WBGene00003630		40 (p=0.0027)				0	0	0	0	4	7xbi	0	38		0	0	0
unc-98	WBGene00006827	13 (p=0.0434)	25 (p=0.0380)				0	0	1	0	1	1xbi	0	65		0	4	0
wrm-1	WBGene00006943		24 (p=0.0046)				0	0	0	0	1	1xbi, 1xtri	0			0	4	0
F21A10.2	WBGene00008999		28 (p=0.0017)				0	1	0	0	4	4xbi, 1xtri	0			0	0	2
lsl-1	WBGene00009937		41 (p=0.0125)				1	-2	0	6	0	0	1	-51		0	0	0
ztf-17	WBGene00011639		26 (p=0.0132)			33 (p=0.0441)	0	0	1	0	0	0	0			1	4	0
C02F5.12	WBGene00015352	22 (p=0.0162)					0	0	0	2	1	3xbi, 1xtri	0	52		0	2	0
F41H10.4	WBGene00018317	27 (p=0.0025)		35 (p=0.0308)			0	0	0	0	2	4xbi, 2xtri	0		57	0	0	0
Y37F4.6	WBGene00021387		24 (p=0.0067)				0	0	0	0	0	0	0			1	4	1
ZK546.5	WBGene00022762	22 (p=0.0014)	41 (p=0.0028)	25 (p=0.0053)			1	-6	0	7	0	0	0			0	0	0	2/8 spermatogenic germline
Genes above are shown in Figure1D
tbp-1	WBGene00006542	100% severely underdeveloped germ lines																	8/8 underdeveloped severely defective germ line
cdc-5L	WBGene00008386	100% severely underdeveloped germ lines																	8/8 severely underdeveloped germ lines with only a few germ cells with no sperm or oocytes
F23B12.7	WBGene00009084	100% severely underdeveloped germ lines																	4/8 spermatogenic germline, 4/8 small germline with no sperm or oocyte
F33H1.4	WBGene00009365	100% severely underdeveloped germ lines																	3/8 small spermatogenic germline + 5/8 small germline (can't see features)
vep-1	WBGene00015091	100% severely underdeveloped germ lines																	8/8 defective small germ line with no sperm or oocytes
znf-622	WBGene00015809	100% severely underdeveloped germ lines																	8/8 small germlines with no sperm and oocytes(8)
F58G1.2	WBGene00010264	100% severely underdeveloped germ lines																	8/8 small or no germ lines observed.
repo-1	WBGene00008683	100% spermatogenic germ lines																	5/8 spermatogenic germline + 3/8 small germline with unfinished spermatogenesis and fewer oocytes
atfs-1	WBGene00013878		24 (p=0.0376)	24 (p=0.0375)															8/8 severely underdeveloped germline
snpc-4	WBGene00001568		34 (p=0.0016)	43 (p=0.0005)															8/8 small and defective germlines with no sperm and oocytes
znf-593	WBGene00013236			22 (p=0.0127)															6/8spermatogenic germline with no oocytes+1/8small germline with no sperm or oocytes
Y18D10A.1	WBGene00012474			17 (p=0.0139)	45 (p=0.0476)														4/8 spermatogenic germ line
ceh-38	WBGene00000459					35 (p=0.0387)	0	-2	0	0	0	0	0			0	0	5
Y111B2A.10	WBGene00013734				46 (p=0.0392)		5	-5	3	5	0	0	1			0	0	0	2/8 spermatogenic germline + 1/8 small and defective germline + 1/8 all chromatin material is outside germline
RNAi of above genes caused significant phenotypes in both distal and proximal analysis.
F19F10.9	WBGene00017605																		8/8 small germline (5 with no sperm or oocytes, 3 spermatogenic germlines), 8/8 vesiculation
lag-1	WBGene00002245																		8/8 underdeveloped germ lines
W04D2.4	WBGene00012243		15 (p=0.0193)																6/8 small defective germline with sperm but no oocytes
ekl-4	WBGene00013676																		4/8 spermatogenic germline
ceh-20	WBGene00000443			25 (p=0.0325)			0	0	0	0	0	0	0		44	0	2	1
daf-3	WBGene00000899	25 (p=0.0004)	14 (p=0.0463)			66 (p=0.0185)	0	0	0	0	1	2xbi	0			2	0	1
daf-19	WBGene00000914	21 (p=0.0040)					0	0	0	0	0	0	0			0	0	1
dnj-11	WBGene00001029			20 (p=0.0175)			0	0	0	0	0	0	0			1	1	0
efl-2	WBGene00001162	16 (p=0.0096)		25 (p=0.0070)			0	0	0	2	0	0	0			1	0	0
egl-18	WBGene00001186			28 (p=0.0140)			0	0	1	0	0	0	0			0	0	0
egl-44	WBGene00001208	18 (p=0.0439)	25 (p=0.0092)				0	0	0	0	0	0	0			0	0	1
eor-1	WBGene00001324		23 (p=0.0027)				0	-1	0	1	0	0	0			1	0	3
flt-1/baz-2	WBGene00001470		31 (p=0.0005)				0	0	0	0	3	9xbi, 1xquad	0			0	2	2
xnd-1	WBGene00001514	24 (p<0.0001)	21 (p=0.0114)	25 (p=0.0008)			1	-1	0	0	0	0	0			0	0	0
gei-8	WBGene00001565	29 (p<0.0001)	17 (p=0.0288)				0	0	0	0	0	0	0			0	2	3
him-8	WBGene00001867		48 (p=0.0167)				0	0	0	0	1	1xbi	0			0	0	1
hmg-5	WBGene00001975		27 (p=0.0208)	22 (p=0.0131)			0	0	0	0	1	1xbi	0			0	0	0
hmg-11	WBGene00001976				54 (p=0.0096)	69 (p=0.0047)	0	0	0	0	0	0	0			0	0	0
hmp-2	WBGene00001979	20 (p=0.0221)					0	0	0	3	0	0	0			0	1	1
hsf-1	WBGene00002004	28 (p<0.0001)				114 (p=0.0161)	0	-1	0	0	0	0	0			2	1	0
let-607	WBGene00002783	21 (p=0.0008)	28 (p=0.0011)				0	0	0	0	0	0	0			1	0	1
lin-11	WBGene00003000			34 (p=0.0085)			0	0	0	0	0	0	0			0	1	0
lin-28	WBGene00003014		17 (p=0.0493)		30 (p=0.0147)	36 (p=0.0105)	0	0	0	0	0	0	0	36	-45	0	0	1
lir-3	WBGene00003046			35 (p=0.0003)			1	-1	0	0	0	0	0			0	0	0
mbf-1	WBGene00003148		22 (p=0.0399)				0	0	0	2	1	1xbi	0			0	0	2
mex-6	WBGene00003231		21 (p=0.0431)				0	-1	0	0	0	0	0			0	0	1
mxl-1	WBGene00003509	17 (p=0.0212)	23 (p=0.0195)	16 (p=0.0273)			0	0	0	0	0	0	0			1	1	0
mxl-2	WBGene00003510			35 (p=0.0003)			0	0	0	0	0	0	0			0	0	0
nfi-1	WBGene00003592	27 (p=0.0047)	26 (p=0.0110)				0	0	0	0	3	8xbi	0			0	0	0
nhr-15	WBGene00003614		35 (p=0.0081)				0	0	0	0	0	0	0			0	0	0
nhr-20	WBGene00003619					30 (p=0.0218)	0	1	0	0	0	0	0			1	0	0
nhr-22	WBGene00003621			20 (p=0.0045)			0	0	0	0	0	0	0			1	0	0
nhr-35	WBGene00003628		26 (p=0.0039)		35 (p=0.0269)		0	0	0	1	0	0	0			1	0	1
nhr-48	WBGene00003638		26 (p=0.0031)				0	0	0	0	1	2xbi	1			1	1	0
nhr-49	WBGene00003639	12 (p=0.0317)		29 (p=0.0219)			0	0	0	0	0	0	2			0	1	0
nhr-69	WBGene00003659			26 (p=0.0211)	36 (p=0.0398)	45 (p=0.0102)	0	0	0	0	0	0	0			0	2	0
nhr-84	WBGene00003674	25 (p=0.0004)		18 (p=0.0474)			0	0	1	0	0	0	0			0	0	1
nhr-97	WBGene00003687	15 (p=0.0132)	22 (p=0.0174)		49 (p=0.0209)		0	0	0	0	1	1xtri	0			0	0	0
nhr-100	WBGene00003690			14 (p=0.0162)		40 (p=0.0473)	0	0	0	0	0	0	0			0	2	2
pal-1	WBGene00003912		22 (p=0.0171)				0	0	0	0	0	0	0			1	0	1
pop-1	WBGene00004077		31 (p=0.0051)				0	0	0	0	1	1xbi	0			0	0	1
pqn-21	WBGene00004111	38 (p<0.0001)	31 (p=0.0002)			80 (p=0.0031)	0	0	0	0	0	0	0			1	0	2
F26F4.8	WBGene00005011	20 (p=0.0171)	31 (p=0.0048)	18 (p=0.0330)			0	0	0	0	0	0	0			0	0	3
ztf-12	WBGene00006342	17 (p=0.0017)			53 (p=0.0393)	84 (p=0.0030)	0	0	0	0	0	0	0			1	0	2
tag-68	WBGene00006445	16 (p=0.0183)	26 (p=0.0012)		53 (p=0.0279)	83 (p=0.0065)	0	0	0	0	0	0	0			0	0	0
tbx-2	WBGene00006543		24 (p=0.0043)				0	-1	0	0	2	4xbi	0			0	0	0
tbx-11	WBGene00006547		36 (p<0.0001)				0	0	0	1	0	0	0			0	0	0
tbx-33	WBGene00006552			38 (p=0.0031)			0	0	0	0	0	0	0			2	1	0
tra-1	WBGene00006604					24 (p=0.0499)	0	0	0	0	0	0	0			0	0	0
B0035.1	WBGene00007105	12 (p=0.0364)	22 (p=0.0039)				0	0	0	0	0	0	0			0	0	1
C01F6.9	WBGene00007223			30 (p=0.0095)			0	0	0	0	0	0	0			1	2	0
spe-44	WBGene00007732		28 (p=0.0030)	30 (p=0.0198)			0	-1	0	3	1	1xbi	0			0	0	0
egrh-1	WBGene00007772					43 (p=0.0452)	0	0	0	0	0	0	0			2	0	2
C38D4.7	WBGene00008007			42 (p=0.0039)			0	0	0	0	0	0	0			0	0	0
D1046.2	WBGene00008363		43 (p=0.0005)				0	0	2	0	0	0	0			0	1	0
bed-3	WBGene00009133	21 (p=0.0055)		16 (p=0.0167)		86 (p=0.0262)	0	0	0	2	1	1xbi	0			1	3	1
row-1	WBGene00009508		21 (p=0.0477)				0	-1	0	0	0	0	0			0	0	0
F39B2.1	WBGene00009553		24 (p=0.0305)	20 (p=0.0184)			0	-1	0	0	1	2xbi	0			0	0	1
drap-1	WBGene00009584				48 (p=0.0365)		0	0	0	0	0	0	0			0	0	0
K09A11.1	WBGene00010704	12 (p=0.0259)				43 (p=0.0104)	0	0	1	0	1	1xbi	0			0	0	3
R10E4.11	WBGene00011206			40 (p=0.0024)			0	0	0	0	0	0	0			0	2	0
zim-2	WBGene00011600	21 (p=0.0132)	34 (p=0.0366)			47 (p=0.0224)	0	1	0	0	0	0	0			0	0	0
ztf-27	WBGene00011661			36 (p=0.0003)			0	0	0	0	0	0	0			0	0	0	1/8 abrupt expansion
T22C8.3	WBGene00011924	12 (p=0.0476)		24 (p=0.0428)			0	0	0	1	0	0	0			1	0	0
W02D9.3	WBGene00012209	20 (p=0.0097)					0	0	0	0	0	0	0			1	3	0
ztf-22	WBGene00012988					44 (p=0.0167)	0	0	0	0	0	0	0			0	1	0
mcd-1	WBGene00013096				37 (p=0.0162)		0	0	0	0	1	5xbi	0			0	0	0
Y56A3A.28	WBGene00013240				33 (p=0.0064)		0	0	0	0	0	0	0			2	2	0
Y57A10A.31	WBGene00013270		23 (p=0.0202)				0	0	0	0	0	0	0			0	0	0
Y67H2A.10	WBGene00013465			23 (p=0.0043)			1	-1	0	0	0	0	0			1	0	0
C18C4.5	WBGene00015966	14 (p=0.0429)		13 (p=0.0275)	44 (p=0.0244)	53 (p=0.0166)	0	0	0	0	0	0	0			0	1	1
elt-7	WBGene00015981		38 (p=0.0151)				0	0	0	0	0	0	0			0	0	2
elf-1	WBGene00016029	21 (p=0.0066)		53 (p=0.0003)			0	0	0	0	0	0	0			0	0	0
C30G4.4	WBGene00016269	20 (p=0.0158)					0	0	1	0	2	8xbi	3			0	1	0
F09G2.9	WBGene00017317		30 (p=0.0055)				0	0	1	0	0	0	0			1	1	0
F37B4.10	WBGene00018140		25 (p=0.0344)				0	0	0	0	0	0	0			1	0	0
nhr-182	WBGene00018265		21 (p=0.0492)	17 (p=0.0352)			0	0	0	0	0	0	0			1	0	0
F54F2.9	WBGene00018836	26 (p=0.0005)					0	0	0	0	0	0	0			0	2	0
zip-2	WBGene00019327		32 (p=0.0001)	26 (p=0.0062)			0	0	0	0	3	4xbi	0			0	0	1
K09H9.7	WBGene00019598	18 (p=0.0143)		24 (p=0.0083)		43 (p=0.0348)	0	-1	0	0	2	3xbi	0	44		0	0	0
K10B3.5	WBGene00019611		20 (p=0.0162)				0	0	0	0	0	0	0		-28	2	3	0
K11D12.12	WBGene00019651		25 (p=0.0126)				0	0	0	0	3	5xbi	0			0	1	0
R02D3.7	WBGene00019824		22 (p=0.0299)				0	0	0	0	1	4xbi	0		-35	0	0	0
R05D3.3	WBGene00019878	27 (p<0.0001)	22 (p=0.0041)			58 (p=0.0049)	0	0	0	0	0	0	0			0	0	0
R151.8	WBGene00020111		26 (p=0.0288)				0	-2	0	0	0	0	0			0	0	0
T26A5.8	WBGene00020823				35 (p=0.0238)	38 (p=0.0227)	0	0	0	0	0	0	0			0	0	0
Y37E11B.1	WBGene00021374		33 (p=0.0066)				0	1	0	0	0	0	0			0	3	0
ztf-23	WBGene00021846	20 (p=0.0003)					0	0	0	2	1	2xbi	0		-31	0	0	0
Y71H2AM.17	WBGene00022182	14 (p=0.0448)	27 (p=0.0099)				0	0	0	0	1	1xbi	1	-28		1	0	0
ZK185.1	WBGene00022681			22 (p=0.0168)			0	0	0	0	1	1xbi	0			0	1	0
egrh-2	WBGene00043705				39 (p=0.0259)		0	0	0	0	0	0	0			0	0	3
nhr-146	WBGene00045255	20 (p=0.0037)		12 (p=0.0455)		57 (p=0.0151)	0	0	0	0	3	7xbi	0			2	0	0
isw-1	WBGene00002169						6	-7	0	0	0	0	1	-36	-70	0	0	1	6/8 abrupt oocyte expansion
swsn-1	WBGene00004203						0	-2	1	6	1	1xbi	0			0	1	0
hlh-30	WBGene00020930						0	-4	0	0	1	1xbi	0			0	1	0	1/8 abrupt oocyte expansion
slr-2	WBGene00013350			14 (p=0.0239)			0	0	4	0	0	0	0			0	3	0
cid-1	WBGene00019629						0	0	2	0	0	0	0			0	4	0
madf-5	WBGene00007242			14 (p=0.0353)			1	-1	0	2	4	6xbi	0			2	3	0	1/8 defective small germline with no visible sperm and oocytes
F21D5.4	WBGene00009009	13 (p=0.0276)					0	-1	0	2	0	0	0		90	1	0	1
ztf-9	WBGene00013966						0	0	0	0	2	8xbi, 1xtri	2		61	0	3	0
dmd-7	WBGene00019521						0	0	0	0	4	10xbi	1			2	0	0
nhr-161	WBGene00016364						0	0	0	0	5	9xbi	1			2	1	0
lin-26	WBGene00003012						0	0	0	0	7	14xbi	0			1	2	0
F44E2.7	WBGene00018420						0	0	0	0	4	4xbi	0			0	1	0
jun-1	WBGene00012005						0	0	0	0	4	6xbi	0			0	0	1
nhr-114	WBGene00003704						0	0	0	0	4	9xbi	0			0	0	0
fkh-3	WBGene00001435						0	1	0	0	2	2xbi	0			0	5	0
egrh-3	WBGene00044651						0	0	1	0	1	9xbi	2		50	0	1	0
let-526	WBGene00002717						0	0	0	0	0	0	1		50	0	2	0
sma-9	WBGene00004862			18 (p=0.0027)			0	0	1	0	1	3xbi	0			0	6	1
lst-5	WBGene00016890						0	0	1	0	0	0	0			0	5	0
him-17	WBGene00001874			14 (p=0.0479)			1	0	0	0	1	1xbi	5	-44		0	1	0
lin-39	WBGene00003024						0	0	1	0	0	0	1			0	6	0
lin-54	WBGene00003037			15 (p=0.0118)			0	0	0	0	0	0	0			0	5	0
F52B5.7	WBGene00009923						0	0	0	0	1	1xbi	0		100	2	0	0
F36D1.1	WBGene00009461						0	0	0	0	0	0	0			4	0	0
Y53F4B.3	WBGene00013150	19 (p<0.0001)					0	0	0	0	0	0	0			4	0	0
Y66A7A.5	WBGene00013425						0	0	0	1	0	0	0			4	0	0
nhr-1	WBGene00003600	12 (p=0.0379)					0	0	0	0	0	0	0	69		0	3	0
nhr-28	WBGene00003624						0	0	1	1	0	0	0	53		0	3	0
ztf-7	WBGene00009772		12 (p=0.0379)				0	0	0	0	0	0	0	41		0	0	4
nsy-7	WBGene00044508						0	0	0	0	1	1xbi	0	57		0	0	1
hmg-1.1	WBGene00001971						0	0	0	0	0	0	0		77	0	2	0
dpl-1	WBGene00001061						0	0	0	1	0	0	0		67	0	1	3
ztf-1	WBGene00018833						0	0	0	0	0	0	0	38	58	0	0	2
ztf-15	WBGene00011066						0	0	0	0	1	2xbi	0		53	0	0	1
ztf-4	WBGene00020399	15 (p=0.0072)					0	0	0	0	0	0	0		60	0	0	0
ceh-93	WBGene00019864						0	0	0	0	1	1xbi	0			0	2	4
C46F11.3	WBGene00008118						0	0	0	0	1	1xbi	0			0	5	0
nhr-256	WBGene00022805			16 (p=0.0294)			0	0	0	0	0	0	0			1	6	0
