# Supplementary material for: A Transcription Factor Functional Atlas of Germline Development
Source: Research Square preprint supplement (doi:10.21203/rs.3.rs-3880498/v1), 2024-01-26
Supplement: Supplementary file 10 [file d509439d704007770e975a30.xlsx]

## Sheet: Results for all TFs
p value was assessed by unpaired t-test. Data is shown when it's statistically significant comparing to control.
			Nuclei counting results (increase, decrease, by X% of control)
Gene.Public.Name	WormBase Gene ID	DNA binding domain	PZ	TZ	SYGL-1+	PH3+	mitotic index
ztf-3	WBGene00016905	ZF - C2H2
ZC123.3	WBGene00022518	ZF - C2H2
F54A5.1	WBGene00018786	HD - HNF		15 (p=0.0360)
ubxn-1	WBGene00017733	ZF - C2H2
nhr-64	WBGene00003654	ZF - NHR
K09H9.7	WBGene00019598	ZF - C2H2	18 (p=0.0143)		24 (p=0.0083)		43 (p=0.0348)
zip-4	WBGene00021552	bZIP
F57C9.4	WBGene00019011	ZF - C2H2	11 (p=0.0286)
vep-1	WBGene00015091	MYB	100% severely underdeveloped germ lines
let-526	WBGene00002717	ARID/BRIGHT
cey-3	WBGene00000474	COLD BOX
cey-2	WBGene00000473	COLD BOX
hmg-3	WBGene00001973	HMG box	18 (p<0.0001)	33 (p=0.0009)	14 (p=0.0353)		88 (p=0.0095)
nhr-2	WBGene00003601	ZF - NHR
C27A12.2	WBGene00016154	ZF - C2H2
tag-146	WBGene00006492	ZF - C2H2
let-607	WBGene00002783	bZIP	21 (p=0.0008)	28 (p=0.0011)
ztf-4	WBGene00020399	ZF - C2H2	15 (p=0.0072)
nhr-23	WBGene00003622	ZF - NHR
ztf-15	WBGene00011066	ZF - C2H2
pbrm-1	WBGene00007042	ZF - C2H2, HMG box
D2030.7	WBGene00008417	ZF - C2H2
cep-1	WBGene00000467	p53
nhr-49	WBGene00003639	ZF - NHR	12 (p=0.0317)		29 (p=0.0219)
lsl-1	WBGene00009937	ZF - C2H2		41 (p=0.0125)
aha-1	WBGene00000095	bHLH
lin-11	WBGene00003000	HD - LIM			34 (p=0.0085)
tag-68	WBGene00006445	MH1	16 (p=0.0183)	26 (p=0.0012)		53 (p=0.0279)	83 (p=0.0065)
Y53H1A.2	WBGene00013178	ZF - C2H2
nfya-2	WBGene00043056	CBF	18 (p=0.0035)	18 (p=0.0307)
F36D1.1	WBGene00009461	MADF
hsf-1	WBGene00002004	WH - HSF	28 (p<0.0001)				114 (p=0.0161)
W02D9.3	WBGene00012209	HMG box	20 (p=0.0097)
Y18D10A.1	WBGene00012474	AT Hook x2			17 (p=0.0139)	45 (p=0.0476)
F39B2.1	WBGene00009553	ZF - C2H2		24 (p=0.0305)	20 (p=0.0184)
ztf-23	WBGene00021846	ZF - C2H2	20 (p=0.0003)
K11D2.4	WBGene00010770	ZF - C2H2			16 (p=0.0234)
C01B12.2	WBGene00015285	SAND
nfyc-1	WBGene00017742	CBF
F45C12.2	WBGene00018433	HD
F42G2.6	WBGene00018355	HD
sea-1	WBGene00004750	T-box	16 (p=0.0143)
C46E10.9	WBGene00016713	ZF - C2H2			12 (p=0.0444)
sea-2	WBGene00004751	ZF - C2H2
H20J04.2	WBGene00019217	AT Hook			14 (p=0.0437)
hmg-11	WBGene00001976	AT Hook x3				54 (p=0.0096)	69 (p=0.0047)
ZK546.5	WBGene00022762	ZF - C2H2	22 (p=0.0014)	41 (p=0.0028)	25 (p=0.0053)
C27D6.4	WBGene00016162	bZIP	11 (p=0.0120)
egl-27	WBGene00001194	ZF - GATA, MYB	13 (p=0.0001)
ada-2	WBGene00017967	ZF - C2H2, MYB	11 (p=0.0150)
lin-26	WBGene00003012	ZF - C2H2
lir-1	WBGene00003044	ZF - C2H2	16 (p=0.0142)
lir-2	WBGene00003045	ZF - C2H2	10 (p=0.0146)
T22C8.3	WBGene00011924	ZF - C2H2	12 (p=0.0476)		24 (p=0.0428)
zfp-2	WBGene00009448	ZF - C2H2	17 (p<0.0001)
nhr-19	WBGene00003618	ZF - NHR		18 (p=0.0163)	14 (p=0.0497)
die-1	WBGene00000995	ZF - C2H2
daf-19	WBGene00000914	WH - RFX	21 (p=0.0040)
F33H1.4	WBGene00009365	ZF - C2H2, AT Hook x3	100% severely underdeveloped germ lines
ref-1	WBGene00004334	bHLH	12 (p=0.0137)
ztf-27	WBGene00011661	ZF - C2H2			36 (p=0.0003)
cey-1	WBGene00000472	COLD BOX
lir-3	WBGene00003046	ZF - C2H2			35 (p=0.0003)
hmg-12	WBGene00001977	AT Hook x7		14 (p=0.0162)
Y57A10A.31	WBGene00013270	ZF - C2H2		23 (p=0.0202)
Y38E10A.6	WBGene00012584	HD - POU
Y48E1B.7	WBGene00013006	ZF - C2H2
mcd-1	WBGene00013096	HD - LIM				37 (p=0.0162)
Y53F4B.3	WBGene00013150	CBF	19 (p<0.0001)
mxl-2	WBGene00003510	bHLH			35 (p=0.0003)
zip-2	WBGene00019327	bZIP		32 (p=0.0001)	26 (p=0.0062)
ztf-18	WBGene00020763	ZF - C2H2
C46F11.3	WBGene00008118	MADF
Y66A7A.5	WBGene00013425	HD
Y79H2A.3	WBGene00013580	ZF - C2H2
tbx-33	WBGene00006552	T-box			38 (p=0.0031)
xbp-1	WBGene00006959	bZIP
R10E4.11	WBGene00011206	ZF - C2H2			40 (p=0.0024)
T23F11.4	WBGene00011956	ZF - C2H2
mel-28	WBGene00003210	AT Hook x2
C38D4.7	WBGene00008007	ZF - C2H2			42 (p=0.0039)
xnd-1	WBGene00001514	AT Hook x2	24 (p<0.0001)	21 (p=0.0114)	25 (p=0.0008)
B0336.7	WBGene00015147	ZF - THAP	17 (p=0.0008)
tbx-11	WBGene00006547	T-box		36 (p<0.0001)
C05D10.1	WBGene00015477	WH - Fork Head, AT Hook	14 (p=0.0193)
hmg-1.2	WBGene00001972	HMG box
znf-622	WBGene00015809	ZF - C2H2	100% severely underdeveloped germ lines
T26A5.8	WBGene00020823	CBF				35 (p=0.0238)	38 (p=0.0227)
ceh-20	WBGene00000443	HD - TALE			25 (p=0.0325)
nhr-10	WBGene00003609	ZF - NHR
hmg-4	WBGene00001974	HMG box	7 (p=0.0296)	17 (p=0.0265)
lin-39	WBGene00003024	HD - HOX
ZK686.4	WBGene00022794	ZF - C2H2	13 (p=0.0045)
lin-36	WBGene00003021	ZF - C2H2, ZF - THAP	12 (p=0.0303)	17 (p=0.0239)
gei-8	WBGene00001565	MYB	29 (p<0.0001)	17 (p=0.0288)
R05D3.3	WBGene00019878	ZF - C2H2 - 1 finger	27 (p<0.0001)	22 (p=0.0041)			58 (p=0.0049)
ztf-1	WBGene00018833	ZF - C2H2
F54F2.9	WBGene00018836	MYB	26 (p=0.0005)
F44E2.7	WBGene00018420	ZF - C2H2
T23G5.6	WBGene00011964	AT Hook	14 (p=0.0256)
hlh-11	WBGene00001955	bHLH	15 (p=0.0220)
athp-1	WBGene00008081	AT Hook x2		19 (p=0.0403)
sup-35	WBGene00012976	ZF - C2H2
tra-1	WBGene00006604	ZF - C2H2					24 (p=0.0499)
sbp-1	WBGene00004735	bHLH
bed-2	WBGene00012943	ZF - BED
ZNF-593	WBGene00013236	ZF - C2H2			22 (p=0.0127)
Y56A3A.28	WBGene00013240	ZF - C2H2				33 (p=0.0064)
dro-1	WBGene00001092	CBF
dnj-17	WBGene00001035	ZF - C2H2
Y71H2AM.17	WBGene00022182	HMG box	14 (p=0.0448)	27 (p=0.0099)
R02D3.7	WBGene00019824	ZF - C2H2		22 (p=0.0299)
nhr-76	WBGene00015497	ZF - NHR
W08E12.1	WBGene00021082	bZIP			16 (p=0.0102)
Y37E11B.1	WBGene00021374	ZF - C2H2		33 (p=0.0066)
nhr-104	WBGene00003694	ZF - NHR
dnj-11	WBGene00001029	MYB			20 (p=0.0175)
hmg-5	WBGene00001975	HMG box		27 (p=0.0208)	22 (p=0.0131)
nhr-66	WBGene00003656	ZF - NHR
ZK185.1	WBGene00022681	ZF - C2H2			22 (p=0.0168)
D1046.2	WBGene00008363	ZF - C2H2		43 (p=0.0005)
C01F6.9	WBGene00007223	ZF - C2H2			30 (p=0.0095)
flh-1	WBGene00012435	ZF - FLYWCH
flh-3	WBGene00012436	ZF - FLYWCH
nhr-100	WBGene00003690	ZF - NHR			14 (p=0.0162)		40 (p=0.0473)
nhr-4	WBGene00003603	ZF - NHR
zim-2	WBGene00011600	ZF - C2H2	21 (p=0.0132)	34 (p=0.0366)			47 (p=0.0224)
zim-3	WBGene00011601	ZF - C2H2	17 (p=0.0015)
him-8	WBGene00001867	ZF - C2H2		48 (p=0.0167)
miz-1	WBGene00011259	ZF - MIZ
rbr-2	WBGene00004319	ARID/BRIGHT
B0035.1	WBGene00007105	ZF - C2H2	12 (p=0.0364)	22 (p=0.0039)
mbf-1	WBGene00003148	HTH		22 (p=0.0399)
mep-1	WBGene00003218	ZF - C2H2
F11A10.2/REPO-1	WBGene00008683	ZF - C2H2	100% spermatogenic germ lines
dmd-6	WBGene00007058	ZF - DM
madf-1	WBGene00021942	ZF - C2H2
Y67D8A.3	WBGene00022060	ZF - DM
nhr-190	WBGene00018622	ZF - NHR
nhr-256	WBGene00022805	ZF - NHR			16 (p=0.0294)
ztf-28	WBGene00018099	ZF - C2H2
nhr-13	WBGene00003612	ZF - NHR
nhr-182	WBGene00018265	ZF - NHR		21 (p=0.0492)	17 (p=0.0352)
F37B4.10	WBGene00018140	ZF - C2H2		25 (p=0.0344)
lin-40	WBGene00003025	ZF - GATA, MYB
unc-62	WBGene00006796	HD - TALE	10 (p=0.0385)
C04F5.9	WBGene00015451	ZF - C2H2	14 (p=0.0379)	12 (p=0.0387)
nhr-47	WBGene00003637	ZF - NHR
fos-1	WBGene00001345	bZIP
F09G2.9	WBGene00017317	AT Hook x3		30 (p=0.0055)
spr-1	WBGene00005006	MYB
W02D7.6	WBGene00020942	ZF - C2H2
mxl-1	WBGene00003509	bHLH	17 (p=0.0212)	23 (p=0.0195)	16 (p=0.0273)
ceh-32	WBGene00000453	HD - SIX	16 (p=0.0173)		12 (p=0.0373)
nhr-154	WBGene00007547	ZF - NHR
C26E1.3	WBGene00007749	HD
somi-1	WBGene00010868	ZF - C2H2
eea-1	WBGene00011696	ZF - C2H2
ZC376.4	WBGene00013876	HD
F23B12.7	WBGene00009084	CBF	100% severely underdeveloped germ lines
pzf-1	WBGene00011505	ZF - C2H2
lsy-27	WBGene00009834	ZF - C2H2
nhr-95	WBGene00003685	ZF - NHR
ATTF-5	WBGene00020214	AT Hook	12 (p=0.0204)
daf-3	WBGene00000899	MH1	25 (p=0.0004)	14 (p=0.0463)			66 (p=0.0185)
tra-4	WBGene00018740	ZF - C2H2
K10B3.5	WBGene00019611	ZF - C2H2		20 (p=0.0162)
nhr-35	WBGene00003628	ZF - NHR		26 (p=0.0039)		35 (p=0.0269)
spr-3	WBGene00005008	ZF - C2H2
F21A10.2	WBGene00008999	p53		28 (p=0.0017)
sex-1	WBGene00004786	ZF - NHR
nfya-1	WBGene00011614	CBF		18 (p=0.0104)
ceh-40	WBGene00000461	HD - TALE		26 (p=0.0047)
atf-6	WBGene00000222	bZIP
nhr-17	WBGene00003616	ZF - NHR
K09A11.1	WBGene00010704	ZF - BED	12 (p=0.0259)				43 (p=0.0104)
nhr-71	WBGene00003661	ZF - NHR
dve-1	WBGene00022861	ZF - THAP
atf-5	WBGene00000221	bZIP
egrh-1	WBGene00007772	ZF - C2H2					43 (p=0.0452)
T27A8.2	WBGene00012074	WH - Fork Head
sdc-1	WBGene00004745	ZF - C2H2
T20F7.1	WBGene00020630	ZF - C2H2
ztf-13	WBGene00018704	ZF - C2H2
lin-15B	WBGene00023497	AT Hook x2, ZF - THAP
ZC204.2	WBGene00022554	HD - HOX
gfl-1	WBGene00001585	YEATS
mdl-1	WBGene00003163	bHLH
nhr-21	WBGene00003620	ZF - NHR
lin-54	WBGene00003037	CxC			15 (p=0.0118)
zip-1	WBGene00006986	bZIP
lmn-1	WBGene00003052	bZIP
hmg-1.1	WBGene00001971	HMG box
zim-1	WBGene00011597	ZF - C2H2 - 1 finger
F15A4.10	WBGene00008844	bZIP		14 (p=0.0468)
nhr-69	WBGene00003659	ZF - NHR			26 (p=0.0211)	36 (p=0.0398)	45 (p=0.0102)
nhr-102	WBGene00003692	ZF - NHR
taf-11.3	WBGene00006395	TBP		16 (p=0.0113)
crh-1	WBGene00000793	bZIP
tbp-1	WBGene00006542	TBP	100% severely underdeveloped germ lines
nfyb-1	WBGene00021132	CBF
ztf-7	WBGene00009772	ZF - C2H2 - 4 fingers		12 (p=0.0379)
atf-7	WBGene00000223	bZIP
cid-1	WBGene00019629	ZF - C2H2 - 1 finger
nhr-20	WBGene00003619	ZF - NHR					30 (p=0.0218)
isw-1	WBGene00002169	AT Hook, MYB x2
lin-28	WBGene00003014	COLD BOX		17 (p=0.0493)		30 (p=0.0147)	36 (p=0.0105)
madf-6	WBGene00016930	MADF	18 (p=0.0372)
rcor-1	WBGene00022278	ZF - GATA, MYB (2x)
row-1	WBGene00009508	ZF - C2H2 - 5 fingers		21 (p=0.0477)
spr-4	WBGene00005009	ZF - C2H2 - 14 fingers	19 (p=0.0037)
Y48C3A.12	WBGene00012994	TSC-22/dip/bun
ztf-22	WBGene00012988	ZF - C2H2 - 1 finger					44 (p=0.0167)
T07F8.4	WBGene00020320	MYB
F58G1.2	WBGene00010264	ZF - C2H2 - 6 fingers	100% severely underdeveloped germ lines
ztf-17	WBGene00011639	ZF - C2H2 - 2 fingers		26 (p=0.0132)			33 (p=0.0441)
efl-2	WBGene00001162	WH - TDP	16 (p=0.0096)		25 (p=0.0070)
F21D5.4	WBGene00009009	Brinker	13 (p=0.0276)
rabs-5	WBGene00021538	ZF - C2H2 - 1 finger
C06A6.2	WBGene00015507	MADF
athp-3	WBGene00013799	AT Hook x5/PHD	17 (p=0.0407)
nhr-34	WBGene00003627	ZF - NHR
nhr-46	WBGene00003636	ZF - NHR
sma-3	WBGene00004857	MH1/SMAD	16 (p=0.0008)
nhr-132	WBGene00003722	ZF - NHR
nhr-181	WBGene00018189	ZF - NHR
nhr-84	WBGene00003674	ZF - NHR	25 (p=0.0004)		18 (p=0.0474)
nhr-243	WBGene00013584	ZF - NHR	17 (p=0.0027)
C50F4.12	WBGene00008236	mTERF
nhr-228	WBGene00020852	ZF - NHR	10 (p=0.0366)
ekl-4	WBGene00013676	MYB
nhr-70	WBGene00003660	ZF - NHR
nhr-12	WBGene00003611	ZF - NHR
atfs-1	WBGene00013878	bZIP		24 (p=0.0376)	24 (p=0.0375)
swsn-1	WBGene00004203	MYB
nhr-32	WBGene00003626	ZF - NHR		17 (p=0.0113)
unc-98	WBGene00006827	ZF - C2H2 - 3 fingers	13 (p=0.0434)	25 (p=0.0380)
lsy-2	WBGene00003087	ZF - C2H2 - 5 fingers
nhr-28	WBGene00003624	ZF - NHR
nhr-1	WBGene00003600	ZF - NHR	12 (p=0.0379)
nhr-15	WBGene00003614	ZF - NHR		35 (p=0.0081)
ztf-8	WBGene00022598	ZF - C2H2 - 3 fingers	14 (p=0.0036)
nhr-40	WBGene00003630	ZF - NHR		40 (p=0.0027)
C46C2.7	WBGene00045078	AP-2
arid-1	WBGene00044689	ARID/BRIGHT
swsn-7	WBGene00007433	ARID/BRIGHT
hlh-14	WBGene00001958	bHLH	13 (p=0.0223)
F41H10.4	WBGene00018317	bZIP	27 (p=0.0025)		35 (p=0.0308)
cebp-2	WBGene00016754	bZIP
drap-1	WBGene00009584	CBF				48 (p=0.0365)
ceh-99	WBGene00044032	HD
ceh-92	WBGene00013431	HD
nsy-7	WBGene00044508	HD
ZC247.1	WBGene00013859	HTH
madf-11	WBGene00015468	MADF
madf-3	WBGene00019218	MADF	17 (p=0.0094)
madf-5	WBGene00007242	MADF		14 (p=0.0353)
flt-1/baz-2	WBGene00001470	MBD		31 (p=0.0005)
mter-4	WBGene00010771	MTERF
chd-7	WBGene00007053	MYB
R151.8	WBGene00020111	MYB		26 (p=0.0288)
myrf-1	WBGene00004134	p53
F19F10.9	WBGene00017605	SART-1
tbx-2	WBGene00006543	T-box		24 (p=0.0043)
tlf-1	WBGene00006577	TBP
C30G4.4	WBGene00016269	TSC-22/DIP/BUN	20 (p=0.0158)
wrm-1	WBGene00006943	β-catenin/armadillo		24 (p=0.0046)
hmp-2	WBGene00001979	β-catenin/armadillo	20 (p=0.0221)
C02F5.12	WBGene00015352	ZF - C2H2	22 (p=0.0162)
K11D12.12	WBGene00019651	ZF - C2H2		25 (p=0.0126)
W04D2.4	WBGene00012243	ZF - C2H2		15 (p=0.0193)
Y37F4.6	WBGene00021387	ZF - C2H2		24 (p=0.0067)
K04C1.3	WBGene00010553	ZF - C2H2
lin-13	WBGene00003002	ZF - C2H2
R144.3	WBGene00020093	ZF - C2H2
slr-2	WBGene00013350	ZF - C2H2			14 (p=0.0239)
Y67H2A.10	WBGene00013465	ZF - C2H2			23 (p=0.0043)
lst-5	WBGene00016890	ZF - C2H2
Y111B2A.10	WBGene00013734	ZF - C2H2				46 (p=0.0392)
sma-9	WBGene00004862	ZF - C2H2			18 (p=0.0027)
egrh-3	WBGene00044651	ZF - C2H2
ztf-9	WBGene00013966	ZF - C2H2
dmd-7	WBGene00019521	ZF - DM
flh-2	WBGene00016138	ZF - FLYWCH	14 (p=0.0385)
nhr-42	WBGene00003632	ZF - NHR
nhr-161	WBGene00016364	ZF - NHR
nhr-122	WBGene00003712	ZF - NHR			12 (p=0.0456)
nhr-138	WBGene00003728	ZF - NHR
nhr-61	WBGene00003651	ZF - NHR
nhr-86	WBGene00003676	ZF - NHR
nhr-114	WBGene00003704	ZF - NHR
nhr-48	WBGene00003638	ZF - NHR		26 (p=0.0031)
nhr-146	WBGene00045255	ZF - NHR	20 (p=0.0037)		12 (p=0.0455)		57 (p=0.0151)
mml-1	WBGene00003378	bHLH
nhr-274	WBGene00021522	ZF - NHR
ztf-20	WBGene00012702	ZF - C2H2
Y52B11A.9	WBGene00013128	ZF - C2H2	10 (p=0.0261)
F26F4.8	WBGene00005011	ZF - C2H2	20 (p=0.0171)	31 (p=0.0048)	18 (p=0.0330)
pqn-21	WBGene00004111	ZF - C2H2 - 1 finger	38 (p<0.0001)	31 (p=0.0002)			80 (p=0.0031)
hnd-1	WBGene00001981	bHLH
cdc-14	WBGene00000383	ZF - THAP
efl-3	WBGene00009899	WH - TDP - 2 domains
him-17	WBGene00001874	ZF - THAP			14 (p=0.0479)
F56D1.1	WBGene00018959	ZF - C2H2 - 4 fingers
tbx-36	WBGene00006555	T-box			18 (p=0.0068)
pop-1	WBGene00004077	HMG box		31 (p=0.0051)
D1081.8/cdc-5L	WBGene00008386	MYB	100% severely underdeveloped germ lines
gei-11/snpc-4	WBGene00001568	MYB		34 (p=0.0016)	43 (p=0.0005)
daf-16	WBGene00000912	WH - Fork Head, AT Hook
sptf-3	WBGene00012735	ZF - DHHC
camt-1	WBGene00020251	IPT/TIG
nfi-1	WBGene00003592	MH1	27 (p=0.0047)	26 (p=0.0110)
aptf-3/F28C6.2	WBGene00009203	AP-2	18 (p=0.0007)	17 (p=0.0114)
jun-1	WBGene00012005	bZIP
pal-1	WBGene00003912	HD - HOX		22 (p=0.0171)
tag-182/nfx-1	WBGene00007048	ZF - NF-X1
tbx-9	WBGene00006546	T-box
egl-18	WBGene00001186	ZF - GATA			28 (p=0.0140)
hlh-30	WBGene00020930	bHLH
elt-1	WBGene00001249	ZF - GATA
nhr-97	WBGene00003687	ZF - NHR	15 (p=0.0132)	22 (p=0.0174)		49 (p=0.0209)
Y5F2A.4	WBGene00012385	ZF - C2H2	19 (p=0.0329)
tag-347/spe-44	WBGene00007732	AT Hook, SAND		28 (p=0.0030)	30 (p=0.0198)
aptf-2/Y62E10A.17	WBGene00013383	AP-2
ceh-49	WBGene00017538	HD - CUT	11 (p=0.0437)
hif-1	WBGene00001851	bHLH
ceh-21	WBGene00000444	HD - CUT
fkh-3	WBGene00001435	WH - Fork Head
dpl-1	WBGene00001061	WH - TDP
hlh-2	WBGene00001949	bHLH	19 (p=0.0216)
ceh-38	WBGene00000459	HD - CUT					35 (p=0.0387)
elf-1	WBGene00016029	WH - ETS	21 (p=0.0066)		53 (p=0.0003)
ham-1	WBGene00001820	WH
lag-1	WBGene00002245	CSL
fkh-4	WBGene00001436	WH - Fork Head
ceh-39	WBGene00000460	HD - CUT
ceh-93	WBGene00019864	HD
egl-44	WBGene00001208	TEA/ATTS	18 (p=0.0439)	25 (p=0.0092)
ets-4	WBGene00017687	WH - ETS		18 (p=0.0389)
fkh-9	WBGene00001441	WH - FH
ztf-11	WBGene00009939	ZF - C2HC		19 (p=0.0494)
cey-4	WBGene00000475	COLD BOX
efl-1	WBGene00001161	WH - TDP
bed-3	WBGene00009133	ZF - BED	21 (p=0.0055)		16 (p=0.0167)		86 (p=0.0262)
eor-1	WBGene00001324	ZF - C2H2 - 9 fingers		23 (p=0.0027)
ceh-44	WBGene00000464	HD	10 (p=0.0401)
Y73E7A.1	WBGene00022268	HMG box
C52E12.1/ZNF-598	WBGene00016888	ZF - C2H2
F52B5.7	WBGene00009923	ZF - C2H2
egrh-2	WBGene00043705	ZF - C2H2				39 (p=0.0259)
dpy-27	WBGene00001086	Unknown
mex-6	WBGene00003231	ZF - CCCH		21 (p=0.0431)
saeg-1	WBGene00010012	ZF - C2H2
Y48G8AL.10/ZNF-236	WBGene00021689	ZF - C2H2
bed-1	WBGene00012674	ZF - BED
ceh-83	WBGene00018446	HD
madf-7	WBGene00015502	MADF
nhr-22	WBGene00003621	ZF - NHR			20 (p=0.0045)
elt-6	WBGene00001253	ZF - GATA			15 (p=0.0438)
ztf-12	WBGene00006342	ZF - C2H2	17 (p=0.0017)			53 (p=0.0393)	84 (p=0.0030)
elt-7	WBGene00015981	ZF - GATA		38 (p=0.0151)
C18C4.5	WBGene00015966	bZIP	14 (p=0.0429)		13 (p=0.0275)	44 (p=0.0244)	53 (p=0.0166)

## Sheet: TFs with significant changes
			Germ cell counting results (increase, decrease, by X% of control)
Gene.Public.Name	WormBase Gene ID	DNA binding domain	PZ	TZ	SYGL-1+	PH3+	mitotic index
pqn-21	WBGene00004111	ZF - C2H2 - 1 finger	38 (p<0.0001)	31 (p=0.0002)			80 (p=0.0031)
gei-8	WBGene00001565	MYB	29 (p<0.0001)	17 (p=0.0288)
hsf-1	WBGene00002004	WH - HSF	28 (p<0.0001)				114 (p=0.0161)
nfi-1	WBGene00003592	MH1	27 (p=0.0047)	26 (p=0.0110)
F41H10.4	WBGene00018317	bZIP	27 (p=0.0025)		35 (p=0.0308)
R05D3.3	WBGene00019878	ZF - C2H2 - 1 finger	27 (p<0.0001)	22 (p=0.0041)			58 (p=0.0049)
F54F2.9	WBGene00018836	MYB	26 (p=0.0005)
nhr-84	WBGene00003674	ZF - NHR	25 (p=0.0004)		18 (p=0.0474)
daf-3	WBGene00000899	MH1	25 (p=0.0004)	14 (p=0.0463)			66 (p=0.0185)
xnd-1	WBGene00001514	AT Hook x2	24 (p<0.0001)	21 (p=0.0114)	25 (p=0.0008)
C02F5.12	WBGene00015352	ZF - C2H2	22 (p=0.0162)
ZK546.5	WBGene00022762	ZF - C2H2	22 (p=0.0014)	41 (p=0.0028)	25 (p=0.0053)
zim-2	WBGene00011600	ZF - C2H2	21 (p=0.0132)	34 (p=0.0366)			47 (p=0.0224)
elf-1	WBGene00016029	WH - ETS	21 (p=0.0066)		53 (p=0.0003)
bed-3	WBGene00009133	ZF - BED	21 (p=0.0055)		16 (p=0.0167)		86 (p=0.0262)
daf-19	WBGene00000914	WH - RFX	21 (p=0.0040)
let-607	WBGene00002783	bZIP	21 (p=0.0008)	28 (p=0.0011)
hmp-2	WBGene00001979	β-catenin/armadillo	20 (p=0.0221)
F26F4.8	WBGene00005011	ZF - C2H2	20 (p=0.0171)	31 (p=0.0048)	18 (p=0.0330)
C30G4.4	WBGene00016269	TSC-22/DIP/BUN	20 (p=0.0158)
W02D9.3	WBGene00012209	HMG box	20 (p=0.0097)
nhr-146	WBGene00045255	ZF - NHR	20 (p=0.0037)		12 (p=0.0455)		57 (p=0.0151)
ztf-23	WBGene00021846	ZF - C2H2	20 (p=0.0003)
him-8	WBGene00001867	ZF - C2H2		48 (p=0.0167)
D1046.2	WBGene00008363	ZF - C2H2		43 (p=0.0005)
lsl-1	WBGene00009937	ZF - C2H2		41 (p=0.0125)
nhr-40	WBGene00003630	ZF - NHR		40 (p=0.0027)
elt-7	WBGene00015981	ZF - GATA		38 (p=0.0151)
tbx-11	WBGene00006547	T-box		36 (p<0.0001)
nhr-15	WBGene00003614	ZF - NHR		35 (p=0.0081)
snpc-4	WBGene00001568	MYB		34 (p=0.0016)	43 (p=0.0005)
Y37E11B.1	WBGene00021374	ZF - C2H2		33 (p=0.0066)
hmg-3	WBGene00001973	HMG box	18 (p<0.0001)	33 (p=0.0009)	14 (p=0.0353)		88 (p=0.0095)
zip-2	WBGene00019327	bZIP		32 (p=0.0001)	26 (p=0.0062)
pop-1	WBGene00004077	HMG box		31 (p=0.0051)
flt-1/baz-2	WBGene00001470	MBD		31 (p=0.0005)
F09G2.9	WBGene00017317	AT Hook x3		30 (p=0.0055)
spe-44	WBGene00007732	AT Hook, SAND		28 (p=0.0030)	30 (p=0.0198)
F21A10.2	WBGene00008999	p53		28 (p=0.0017)
hmg-5	WBGene00001975	HMG box		27 (p=0.0208)	22 (p=0.0131)
Y71H2AM.17	WBGene00022182	HMG box	14 (p=0.0448)	27 (p=0.0099)
R151.8	WBGene00020111	MYB		26 (p=0.0288)
ztf-17	WBGene00011639	ZF - C2H2 - 2 fingers		26 (p=0.0132)			33 (p=0.0441)
ceh-40	WBGene00000461	HD - TALE		26 (p=0.0047)
nhr-35	WBGene00003628	ZF - NHR		26 (p=0.0039)		35 (p=0.0269)
nhr-48	WBGene00003638	ZF - NHR		26 (p=0.0031)
tag-68	WBGene00006445	MH1	16 (p=0.0183)	26 (p=0.0012)		53 (p=0.0279)	83 (p=0.0065)
unc-98	WBGene00006827	ZF - C2H2 - 3 fingers	13 (p=0.0434)	25 (p=0.0380)
F37B4.10	WBGene00018140	ZF - C2H2		25 (p=0.0344)
K11D12.12	WBGene00019651	ZF - C2H2		25 (p=0.0126)
egl-44	WBGene00001208	TEA/ATTS	18 (p=0.0439)	25 (p=0.0092)
atfs-1	WBGene00013878	bZIP		24 (p=0.0376)	24 (p=0.0375)
F39B2.1	WBGene00009553	ZF - C2H2		24 (p=0.0305)	20 (p=0.0184)
Y37F4.6	WBGene00021387	ZF - C2H2		24 (p=0.0067)
wrm-1	WBGene00006943	β-catenin/armadillo		24 (p=0.0046)
tbx-2	WBGene00006543	T-box		24 (p=0.0043)
Y57A10A.31	WBGene00013270	ZF - C2H2		23 (p=0.0202)
mxl-1	WBGene00003509	bHLH	17 (p=0.0212)	23 (p=0.0195)	16 (p=0.0273)
eor-1	WBGene00001324	ZF - C2H2 - 9 fingers		23 (p=0.0027)
mbf-1	WBGene00003148	HTH		22 (p=0.0399)
R02D3.7	WBGene00019824	ZF - C2H2		22 (p=0.0299)
nhr-97	WBGene00003687	ZF - NHR	15 (p=0.0132)	22 (p=0.0174)		49 (p=0.0209)
pal-1	WBGene00003912	HD - HOX		22 (p=0.0171)
B0035.1	WBGene00007105	ZF - C2H2	12 (p=0.0364)	22 (p=0.0039)
nhr-182	WBGene00018265	ZF - NHR		21 (p=0.0492)	17 (p=0.0352)
row-1	WBGene00009508	ZF - C2H2 - 5 fingers		21 (p=0.0477)
mex-6	WBGene00003231	ZF - CCCH		21 (p=0.0431)
K10B3.5	WBGene00019611	ZF - C2H2		20 (p=0.0162)
C38D4.7	WBGene00008007	ZF - C2H2			42 (p=0.0039)
R10E4.11	WBGene00011206	ZF - C2H2			40 (p=0.0024)
tbx-33	WBGene00006552	T-box			38 (p=0.0031)
ztf-27	WBGene00011661	ZF - C2H2			36 (p=0.0003)
lir-3	WBGene00003046	ZF - C2H2			35 (p=0.0003)
mxl-2	WBGene00003510	bHLH			35 (p=0.0003)
lin-11	WBGene00003000	HD - LIM			34 (p=0.0085)
C01F6.9	WBGene00007223	ZF - C2H2			30 (p=0.0095)
nhr-49	WBGene00003639	ZF - NHR	12 (p=0.0317)		29 (p=0.0219)
egl-18	WBGene00001186	ZF - GATA			28 (p=0.0140)
nhr-69	WBGene00003659	ZF - NHR			26 (p=0.0211)	36 (p=0.0398)	45 (p=0.0102)
ceh-20	WBGene00000443	HD - TALE			25 (p=0.0325)
efl-2	WBGene00001162	WH - TDP	16 (p=0.0096)		25 (p=0.0070)
T22C8.3	WBGene00011924	ZF - C2H2	12 (p=0.0476)		24 (p=0.0428)
K09H9.7	WBGene00019598	ZF - C2H2	18 (p=0.0143)		24 (p=0.0083)		43 (p=0.0348)
Y67H2A.10	WBGene00013465	ZF - C2H2			23 (p=0.0043)
ZK185.1	WBGene00022681	ZF - C2H2			22 (p=0.0168)
znf-593	WBGene00013236	ZF - C2H2			22 (p=0.0127)
dnj-11	WBGene00001029	MYB			20 (p=0.0175)
nhr-22	WBGene00003621	ZF - NHR			20 (p=0.0045)
Genes above are shown in Figure 1B.
repo-1	WBGene00008683	ZF - C2H2	100% spermatogenic germ lines
vep-1	WBGene00015091	MYB	100% severely underdeveloped germ lines
F33H1.4	WBGene00009365	ZF - C2H2, AT Hook x3	100% severely underdeveloped germ lines
znf-622	WBGene00015809	ZF - C2H2	100% severely underdeveloped germ lines
F23B12.7	WBGene00009084	CBF	100% severely underdeveloped germ lines
tbp-1	WBGene00006542	TBP	100% severely underdeveloped germ lines
F58G1.2	WBGene00010264	ZF - C2H2 - 6 fingers	100% severely underdeveloped germ lines
D1081.8/cdc-5L	WBGene00008386	MYB	100% severely underdeveloped germ lines
RNAi of above eight gene caused 100% sterility.
hmg-11	WBGene00001976	AT Hook x3				54 (p=0.0096)	69 (p=0.0047)
ztf-12	WBGene00006342	ZF - C2H2	17 (p=0.0017)			53 (p=0.0393)	84 (p=0.0030)
drap-1	WBGene00009584	CBF				48 (p=0.0365)
Y111B2A.10	WBGene00013734	ZF - C2H2				46 (p=0.0392)
Y18D10A.1	WBGene00012474	AT Hook x2			17 (p=0.0139)	45 (p=0.0476)
C18C4.5	WBGene00015966	bZIP	14 (p=0.0429)		13 (p=0.0275)	44 (p=0.0244)	53 (p=0.0166)
egrh-2	WBGene00043705	ZF - C2H2				39 (p=0.0259)
mcd-1	WBGene00013096	HD - LIM				37 (p=0.0162)
T26A5.8	WBGene00020823	CBF				35 (p=0.0238)	38 (p=0.0227)
Y56A3A.28	WBGene00013240	ZF - C2H2				33 (p=0.0064)
lin-28	WBGene00003014	COLD BOX		17 (p=0.0493)		30 (p=0.0147)	36 (p=0.0105)
ztf-22	WBGene00012988	ZF - C2H2 - 1 finger					44 (p=0.0167)
egrh-1	WBGene00007772	ZF - C2H2					43 (p=0.0452)
K09A11.1	WBGene00010704	ZF - BED	12 (p=0.0259)				43 (p=0.0104)
nhr-100	WBGene00003690	ZF - NHR			14 (p=0.0162)		40 (p=0.0473)
ceh-38	WBGene00000459	HD - CUT					35 (p=0.0387)
nhr-20	WBGene00003619	ZF - NHR					30 (p=0.0218)
tra-1	WBGene00006604	ZF - C2H2					24 (p=0.0499)
RNAi of all genes above caused at least 20% changes (statistically significant) in at least one of cell counting analysis.
RNAi of all genes below caused statistically significant changes that are less than 20% in at least one of cell counting analysis.
tbx-36	WBGene00006555	T-box			18 (p=0.0068)
sma-9	WBGene00004862	ZF - C2H2			18 (p=0.0027)
nhr-256	WBGene00022805	ZF - NHR			16 (p=0.0294)
K11D2.4	WBGene00010770	ZF - C2H2			16 (p=0.0234)
W08E12.1	WBGene00021082	bZIP			16 (p=0.0102)
elt-6	WBGene00001253	ZF - GATA			15 (p=0.0438)
lin-54	WBGene00003037	CxC			15 (p=0.0118)
nhr-19	WBGene00003618	ZF - NHR		18 (p=0.0163)	14 (p=0.0497)
him-17	WBGene00001874	ZF - THAP			14 (p=0.0479)
H20J04.2	WBGene00019217	AT Hook			14 (p=0.0437)
slr-2	WBGene00013350	ZF - C2H2			14 (p=0.0239)
nhr-122	WBGene00003712	ZF - NHR			12 (p=0.0456)
C46E10.9	WBGene00016713	ZF - C2H2			12 (p=0.0444)
ceh-32	WBGene00000453	HD - SIX	16 (p=0.0173)		12 (p=0.0373)
ztf-11	WBGene00009939	ZF - C2HC		19 (p=0.0494)
athp-1	WBGene00008081	AT Hook x2		19 (p=0.0403)
ets-4	WBGene00017687	WH - ETS		18 (p=0.0389)
nfya-2	WBGene00043056	CBF	18 (p=0.0035)	18 (p=0.0307)
nfya-1	WBGene00011614	CBF		18 (p=0.0104)
hmg-4	WBGene00001974	HMG box	7 (p=0.0296)	17 (p=0.0265)
lin-36	WBGene00003021	ZF - C2H2, ZF - THAP	12 (p=0.0303)	17 (p=0.0239)
aptf-3/F28C6.2	WBGene00009203	AP-2	18 (p=0.0007)	17 (p=0.0114)
nhr-32	WBGene00003626	ZF - NHR		17 (p=0.0113)
taf-11.3	WBGene00006395	TBP		16 (p=0.0113)
F54A5.1	WBGene00018786	HD - HNF		15 (p=0.0360)
W04D2.4	WBGene00012243	ZF - C2H2		15 (p=0.0193)
F15A4.10	WBGene00008844	bZIP		14 (p=0.0468)
madf-5	WBGene00007242	MADF		14 (p=0.0353)
hmg-12	WBGene00001977	AT Hook x7		14 (p=0.0162)
C04F5.9	WBGene00015451	ZF - C2H2	14 (p=0.0379)	12 (p=0.0387)
ztf-7	WBGene00009772	ZF - C2H2 - 4 fingers		12 (p=0.0379)
Y5F2A.4	WBGene00012385	ZF - C2H2	19 (p=0.0329)
hlh-2	WBGene00001949	bHLH	19 (p=0.0216)
spr-4	WBGene00005009	ZF - C2H2 - 14 fingers	19 (p=0.0037)
Y53F4B.3	WBGene00013150	CBF	19 (p<0.0001)
madf-6	WBGene00016930	MADF	18 (p=0.0372)
athp-3	WBGene00013799	AT Hook x5/PHD	17 (p=0.0407)
madf-3	WBGene00019218	MADF	17 (p=0.0094)
nhr-243	WBGene00013584	ZF - NHR	17 (p=0.0027)
zim-3	WBGene00011601	ZF - C2H2	17 (p=0.0015)
B0336.7	WBGene00015147	ZF - THAP	17 (p=0.0008)
zfp-2	WBGene00009448	ZF - C2H2	17 (p<0.0001)
sea-1	WBGene00004750	T-box	16 (p=0.0143)
lir-1	WBGene00003044	ZF - C2H2	16 (p=0.0142)
sma-3	WBGene00004857	MH1/SMAD	16 (p=0.0008)
hlh-11	WBGene00001955	bHLH	15 (p=0.0220)
ztf-4	WBGene00020399	ZF - C2H2	15 (p=0.0072)
flh-2	WBGene00016138	ZF - FLYWCH	14 (p=0.0385)
T23G5.6	WBGene00011964	AT Hook	14 (p=0.0256)
C05D10.1	WBGene00015477	WH - Fork Head, AT Hook	14 (p=0.0193)
ztf-8	WBGene00022598	ZF - C2H2 - 3 fingers	14 (p=0.0036)
F21D5.4	WBGene00009009	Brinker	13 (p=0.0276)
hlh-14	WBGene00001958	bHLH	13 (p=0.0223)
ZK686.4	WBGene00022794	ZF - C2H2	13 (p=0.0045)
egl-27	WBGene00001194	ZF - GATA, MYB	13 (p=0.0001)
nhr-1	WBGene00003600	ZF - NHR	12 (p=0.0379)
ATTF-5	WBGene00020214	AT Hook	12 (p=0.0204)
ref-1	WBGene00004334	bHLH	12 (p=0.0137)
ceh-49	WBGene00017538	HD - CUT	11 (p=0.0437)
F57C9.4	WBGene00019011	ZF - C2H2	11 (p=0.0286)
ada-2	WBGene00017967	ZF - C2H2, MYB	11 (p=0.0150)
C27D6.4	WBGene00016162	bZIP	11 (p=0.0120)
ceh-44	WBGene00000464	HD	10 (p=0.0401)
unc-62	WBGene00006796	HD - TALE	10 (p=0.0385)
nhr-228	WBGene00020852	ZF - NHR	10 (p=0.0366)
Y52B11A.9	WBGene00013128	ZF - C2H2	10 (p=0.0261)
lir-2	WBGene00003045	ZF - C2H2	10 (p=0.0146)

## Sheet: Sterile TF
RNAi knockdown of these TFs caused absence of embryos in one-day adults.
Gene.Public.Name	WormBase Gene ID	DNA binding domain	Human homologs (Wormbase)	Predicted functions (Wormbase)
vep-1	WBGene00015091	MYB	BDP1 (B double prime 1, subunit of RNA polymerase III transcription initiation factor IIIB)	Predicted to enable TFIIIC-class transcription factor complex binding activity.
F33H1.4	WBGene00009365	ZF - C2H2, AT Hook x3	None	Predicted to be located in nucleolus.
znf-622	WBGene00015809	ZF - C2H2	ZNF622 (zinc finger protein 622)	Predicted to be involved in ribosomal large subunit biogenesis.
F23B12.7	WBGene00009084	CBF	CEBPZ (CCAAT enhancer binding protein zeta)	Predicted to be located in nucleus.
tbp-1	WBGene00006542	TBP	TBP (TATA-box binding protein) and TBPL2 (TATA-box binding protein like 2)	RNA polymerase II general transcription initiation factor binding activity.
F58G1.2	WBGene00010264	ZF - C2H2 - 6 fingers	Transcriptional repressor CTCF	Predicted to be involved in regulation of transcription by RNA polymerase II.
cdc-5L	WBGene00008386	MYB	CDC5L (cell division cycle 5 like)	Predicted to be involved in mRNA splicing, via spliceosome and regulation of transcription by RNA polymerase II.
repo-1	WBGene00008683	ZF - C2H2	SF3A2 (splicing factor 3a subunit 2).	Predicted to be involved in spliceosomal complex assembly.

## Sheet: PZ
RNAi knockdown of these TFs caused significant changes in the number of PZ nuclei.
			Nuclei counting results (increase, decrease, by X% of control)
Gene.Public.Name	WormBase Gene ID	DNA binding domain	PZ	TZ	SYGL-1+	pH3+	mitotic index
pqn-21	WBGene00004111	ZF - C2H2 - 1 finger	38 (p<0.0001)	31 (p=0.0002)			80 (p=0.0031)
hsf-1	WBGene00002004	WH - HSF	28 (p<0.0001)				114 (p=0.0161)
R05D3.3	WBGene00019878	ZF - C2H2 - 1 finger	27 (p<0.0001)	22 (p=0.0041)			58 (p=0.0049)
daf-3	WBGene00000899	MH1	25 (p=0.0004)	14 (p=0.0463)			66 (p=0.0185)
nhr-84	WBGene00003674	ZF - NHR	25 (p=0.0004)		18 (p=0.0474)
xnd-1	WBGene00001514	AT Hook x2	24 (p<0.0001)	21 (p=0.0114)	25 (p=0.0008)
bed-3	WBGene00009133	ZF - BED	21 (p=0.0055)		16 (p=0.0167)		86 (p=0.0262)
let-607	WBGene00002783	bZIP	21 (p=0.0008)	28 (p=0.0011)
nhr-146	WBGene00045255	ZF - NHR	20 (p=0.0037)		12 (p=0.0455)		57 (p=0.0151)
ztf-23	WBGene00021846	ZF - C2H2	20 (p=0.0003)
Y53F4B.3	WBGene00013150	CBF	19 (p<0.0001)
egl-44	WBGene00001208	TEA/ATTS	18 (p=0.0439)	25 (p=0.0092)
nfya-2	WBGene00043056	CBF	18 (p=0.0035)	18 (p=0.0307)
aptf-3/F28C6.2	WBGene00009203	AP-2	18 (p=0.0007)	17 (p=0.0114)
hmg-3	WBGene00001973	HMG box	18 (p<0.0001)	33 (p=0.0009)	14 (p=0.0353)		88 (p=0.0095)
athp-3	WBGene00013799	AT Hook x5/PHD	17 (p=0.0407)
mxl-1	WBGene00003509	bHLH	17 (p=0.0212)	23 (p=0.0195)	16 (p=0.0273)
nhr-243	WBGene00013584	ZF - NHR	17 (p=0.0027)
ztf-12	WBGene00006342	ZF - C2H2	17 (p=0.0017)			53 (p=0.0393)	84 (p=0.0030)
zim-3	WBGene00011601	ZF - C2H2	17 (p=0.0015)
B0336.7	WBGene00015147	ZF - THAP	17 (p=0.0008)
tag-68	WBGene00006445	MH1	16 (p=0.0183)	26 (p=0.0012)		53 (p=0.0279)	83 (p=0.0065)
ceh-32	WBGene00000453	HD - SIX	16 (p=0.0173)		12 (p=0.0373)
efl-2	WBGene00001162	WH - TDP	16 (p=0.0096)		25 (p=0.0070)
sma-3	WBGene00004857	MH1/SMAD	16 (p=0.0008)
ztf-4	WBGene00020399	ZF - C2H2	15 (p=0.0072)
Y71H2AM.17	WBGene00022182	HMG box	14 (p=0.0448)	27 (p=0.0099)
flh-2	WBGene00016138	ZF - FLYWCH	14 (p=0.0385)
C04F5.9	WBGene00015451	ZF - C2H2	14 (p=0.0379)	12 (p=0.0387)
C05D10.1	WBGene00015477	WH - Fork Head, AT Hook	14 (p=0.0193)
F21D5.4	WBGene00009009	Brinker	13 (p=0.0276)
egl-27	WBGene00001194	ZF - GATA, MYB	13 (p=0.0001)
T22C8.3	WBGene00011924	ZF - C2H2	12 (p=0.0476)		24 (p=0.0428)
B0035.1	WBGene00007105	ZF - C2H2	12 (p=0.0364)	22 (p=0.0039)
nhr-49	WBGene00003639	ZF - NHR	12 (p=0.0317)		29 (p=0.0219)
ATTF-5	WBGene00020214	AT Hook	12 (p=0.0204)
ceh-44	WBGene00000464	HD	10 (p=0.0401)
unc-62	WBGene00006796	HD - TALE	10 (p=0.0385)
nhr-228	WBGene00020852	ZF - NHR	10 (p=0.0366)
Y52B11A.9	WBGene00013128	ZF - C2H2	10 (p=0.0261)
lir-2	WBGene00003045	ZF - C2H2	10 (p=0.0146)
hmg-4	WBGene00001974	HMG box	7 (p=0.0296)	17 (p=0.0265)
C27D6.4	WBGene00016162	bZIP	11 (p=0.0120)
ada-2	WBGene00017967	ZF - C2H2, MYB	11 (p=0.0150)
F57C9.4	WBGene00019011	ZF - C2H2	11 (p=0.0286)
ceh-49	WBGene00017538	HD - CUT	11 (p=0.0437)
ref-1	WBGene00004334	bHLH	12 (p=0.0137)
K09A11.1	WBGene00010704	ZF - BED	12 (p=0.0259)				43 (p=0.0104)
lin-36	WBGene00003021	ZF - C2H2, ZF - THAP	12 (p=0.0303)	17 (p=0.0239)
nhr-1	WBGene00003600	ZF - NHR	12 (p=0.0379)
ZK686.4	WBGene00022794	ZF - C2H2	13 (p=0.0045)
hlh-14	WBGene00001958	bHLH	13 (p=0.0223)
unc-98	WBGene00006827	ZF - C2H2 - 3 fingers	13 (p=0.0434)	25 (p=0.0380)
ztf-8	WBGene00022598	ZF - C2H2 - 3 fingers	14 (p=0.0036)
T23G5.6	WBGene00011964	AT Hook	14 (p=0.0256)
C18C4.5	WBGene00015966	bZIP	14 (p=0.0429)		13 (p=0.0275)	44 (p=0.0244)	53 (p=0.0166)
nhr-97	WBGene00003687	ZF - NHR	15 (p=0.0132)	22 (p=0.0174)		49 (p=0.0209)
hlh-11	WBGene00001955	bHLH	15 (p=0.0220)
lir-1	WBGene00003044	ZF - C2H2	16 (p=0.0142)
sea-1	WBGene00004750	T-box	16 (p=0.0143)
zfp-2	WBGene00009448	ZF - C2H2	17 (p<0.0001)
madf-3	WBGene00019218	MADF	17 (p=0.0094)
K09H9.7	WBGene00019598	ZF - C2H2	18 (p=0.0143)		24 (p=0.0083)		43 (p=0.0348)
madf-6	WBGene00016930	MADF	18 (p=0.0372)
spr-4	WBGene00005009	ZF - C2H2 - 14 fingers	19 (p=0.0037)
hlh-2	WBGene00001949	bHLH	19 (p=0.0216)
Y5F2A.4	WBGene00012385	ZF - C2H2	19 (p=0.0329)
W02D9.3	WBGene00012209	HMG box	20 (p=0.0097)
C30G4.4	WBGene00016269	TSC-22/DIP/BUN	20 (p=0.0158)
F26F4.8	WBGene00005011	ZF - C2H2	20 (p=0.0171)	31 (p=0.0048)	18 (p=0.0330)
hmp-2	WBGene00001979	β-catenin/armadillo	20 (p=0.0221)
daf-19	WBGene00000914	WH - RFX	21 (p=0.0040)
elf-1	WBGene00016029	WH - ETS	21 (p=0.0066)		53 (p=0.0003)
zim-2	WBGene00011600	ZF - C2H2	21 (p=0.0132)	34 (p=0.0366)			47 (p=0.0224)
ZK546.5	WBGene00022762	ZF - C2H2	22 (p=0.0014)	41 (p=0.0028)	25 (p=0.0053)
C02F5.12	WBGene00015352	ZF - C2H2	22 (p=0.0162)
F54F2.9	WBGene00018836	MYB	26 (p=0.0005)
F41H10.4	WBGene00018317	bZIP	27 (p=0.0025)		35 (p=0.0308)
nfi-1	WBGene00003592	MH1	27 (p=0.0047)	26 (p=0.0110)
gei-8	WBGene00001565	MYB	29 (p<0.0001)	17 (p=0.0288)

## Sheet: TZ
RNAi knockdown of these TFs caused significant changes in the number of TZ nuclei.
			Nuclei counting results (increase, decrease, by X% of control)
Gene.Public.Name	WormBase Gene ID	DNA binding domain	PZ	TZ	SYGL-1+	mitotic index
D1046.2	WBGene00008363	ZF - C2H2		43 (p=0.0005)
nhr-40	WBGene00003630	ZF - NHR		40 (p=0.0027)
tbx-11	WBGene00006547	T-box		36 (p<0.0001)
nhr-15	WBGene00003614	ZF - NHR		35 (p=0.0081)
gei-11/snpc-4	WBGene00001568	MYB		34 (p=0.0016)	43 (p=0.0005)
hmg-3	WBGene00001973	HMG box	18 (p<0.0001)	33 (p=0.0009)	14 (p=0.0353)	88 (p=0.0095)
Y37E11B.1	WBGene00021374	ZF - C2H2		33 (p=0.0066)
zip-2	WBGene00019327	bZIP		32 (p=0.0001)	26 (p=0.0062)
pqn-21	WBGene00004111	ZF - C2H2 - 1 finger	38 (p<0.0001)	31 (p=0.0002)		80 (p=0.0031)
pop-1	WBGene00004077	HMG box		31 (p=0.0051)
flt-1/baz-2	WBGene00001470	MBD		31 (p=0.0005)
F09G2.9	WBGene00017317	AT Hook x3		30 (p=0.0055)
tag-347/spe-44	WBGene00007732	AT Hook, SAND		28 (p=0.0030)	30 (p=0.0198)
F21A10.2	WBGene00008999	p53		28 (p=0.0017)
let-607	WBGene00002783	bZIP	21 (p=0.0008)	28 (p=0.0011)
hmg-5	WBGene00001975	HMG box		27 (p=0.0208)	22 (p=0.0131)
Y71H2AM.17	WBGene00022182	HMG box	14 (p=0.0448)	27 (p=0.0099)
ceh-40	WBGene00000461	HD - TALE		26 (p=0.0047)
tag-68	WBGene00006445	MH1	16 (p=0.0183)	26 (p=0.0012)		83 (p=0.0065)
ztf-17	WBGene00011639	ZF - C2H2 - 2 fingers		26 (p=0.0132)		33 (p=0.0441)
R151.8	WBGene00020111	MYB		26 (p=0.0288)
nhr-48	WBGene00003638	ZF - NHR		26 (p=0.0031)
nhr-35	WBGene00003628	ZF - NHR		26 (p=0.0039)
egl-44	WBGene00001208	TEA/ATTS	18 (p=0.0439)	25 (p=0.0092)
K11D12.12	WBGene00019651	ZF - C2H2		25 (p=0.0126)
unc-98	WBGene00006827	ZF - C2H2 - 3 fingers	13 (p=0.0434)	25 (p=0.0380)
F37B4.10	WBGene00018140	ZF - C2H2		25 (p=0.0344)
tbx-2	WBGene00006543	T-box		24 (p=0.0043)
F39B2.1	WBGene00009553	ZF - C2H2		24 (p=0.0305)	20 (p=0.0184)
atfs-1	WBGene00013878	bZIP		24 (p=0.0376)	24 (p=0.0375)
wrm-1	WBGene00006943	β-catenin/armadillo		24 (p=0.0046)
Y37F4.6	WBGene00021387	ZF - C2H2		24 (p=0.0067)
Y57A10A.31	WBGene00013270	ZF - C2H2		23 (p=0.0202)
eor-1	WBGene00001324	ZF - C2H2 - 9 fingers		23 (p=0.0027)
mxl-1	WBGene00003509	bHLH	17 (p=0.0212)	23 (p=0.0195)	16 (p=0.0273)
R05D3.3	WBGene00019878	ZF - C2H2 - 1 finger	27 (p<0.0001)	22 (p=0.0041)		58 (p=0.0049)
B0035.1	WBGene00007105	ZF - C2H2	12 (p=0.0364)	22 (p=0.0039)
pal-1	WBGene00003912	HD - HOX		22 (p=0.0171)
R02D3.7	WBGene00019824	ZF - C2H2		22 (p=0.0299)
mbf-1	WBGene00003148	HTH		22 (p=0.0399)
xnd-1	WBGene00001514	AT Hook x2	24 (p<0.0001)	21 (p=0.0114)	25 (p=0.0008)
nhr-182	WBGene00018265	ZF - NHR		21 (p=0.0492)	17 (p=0.0352)
row-1	WBGene00009508	ZF - C2H2 - 5 fingers		21 (p=0.0477)
K10B3.5	WBGene00019611	ZF - C2H2		20 (p=0.0162)
athp-1	WBGene00008081	AT Hook x2		19 (p=0.0403)
nfya-1	WBGene00011614	CBF		18 (p=0.0104)
ets-4	WBGene00017687	WH - ETS		18 (p=0.0389)
nhr-19	WBGene00003618	ZF - NHR		18 (p=0.0163)	14 (p=0.0497)
nfya-2	WBGene00043056	CBF	18 (p=0.0035)	18 (p=0.0307)
lin-28	WBGene00003014	COLD BOX		17 (p=0.0493)		36 (p=0.0105)
aptf-3/F28C6.2	WBGene00009203	AP-2	18 (p=0.0007)	17 (p=0.0114)
gei-8	WBGene00001565	MYB	29 (p<0.0001)	17 (p=0.0288)
hmg-4	WBGene00001974	HMG box	7 (p=0.0296)	17 (p=0.0265)
F54A5.1	WBGene00018786	HD - HNF		15 (p=0.0360)
W04D2.4	WBGene00012243	ZF - C2H2		15 (p=0.0193)
madf-5	WBGene00007242	MADF		14 (p=0.0353)
hmg-12	WBGene00001977	AT Hook x7		14 (p=0.0162)
daf-3	WBGene00000899	MH1	25 (p=0.0004)	14 (p=0.0463)		66 (p=0.0185)
F15A4.10	WBGene00008844	bZIP		14 (p=0.0468)
C04F5.9	WBGene00015451	ZF - C2H2	14 (p=0.0379)	12 (p=0.0387)
ztf-7	WBGene00009772	ZF - C2H2 - 4 fingers		12 (p=0.0379)
taf-11.3	WBGene00006395	TBP		16 (p=0.0113)
nhr-32	WBGene00003626	ZF - NHR		17 (p=0.0113)
lin-36	WBGene00003021	ZF - C2H2, ZF - THAP	12 (p=0.0303)	17 (p=0.0239)
ztf-11	WBGene00009939	ZF - C2HC		19 (p=0.0494)
mex-6	WBGene00003231	ZF - CCCH		21 (p=0.0431)
nhr-97	WBGene00003687	ZF - NHR	15 (p=0.0132)	22 (p=0.0174)
nfi-1	WBGene00003592	MH1	27 (p=0.0047)	26 (p=0.0110)
F26F4.8	WBGene00005011	ZF - C2H2	20 (p=0.0171)	31 (p=0.0048)	18 (p=0.0330)
zim-2	WBGene00011600	ZF - C2H2	21 (p=0.0132)	34 (p=0.0366)		47 (p=0.0224)
elt-7	WBGene00015981	ZF - GATA		38 (p=0.0151)
lsl-1	WBGene00009937	ZF - C2H2		41 (p=0.0125)
ZK546.5	WBGene00022762	ZF - C2H2	22 (p=0.0014)	41 (p=0.0028)	25 (p=0.0053)
him-8	WBGene00001867	ZF - C2H2		48 (p=0.0167)

## Sheet: PZ+TZ
RNAi knockdown of these TFs caused significant changes in the numbers of both PZ and TZ nuclei.
			Nuclei counting results (increase, decrease, by X% of control)
Gene.Public.Name	WormBase Gene ID	DNA binding domain	PZ	TZ	SYGL-1+	mitotic index
pqn-21	WBGene00004111	ZF - C2H2 - 1 finger	38 (p<0.0001)	31 (p=0.0002)		80 (p=0.0031)
R05D3.3	WBGene00019878	ZF - C2H2 - 1 finger	27 (p<0.0001)	22 (p=0.0041)		58 (p=0.0049)
daf-3	WBGene00000899	MH1	25 (p=0.0004)	14 (p=0.0463)		66 (p=0.0185)
xnd-1	WBGene00001514	AT Hook x2	24 (p<0.0001)	21 (p=0.0114)	25 (p=0.0008)
let-607	WBGene00002783	bZIP	21 (p=0.0008)	28 (p=0.0011)
hmg-3	WBGene00001973	HMG box	18 (p<0.0001)	33 (p=0.0009)	14 (p=0.0353)	88 (p=0.0095)
nfya-2	WBGene00043056	CBF	18 (p=0.0035)	18 (p=0.0307)
aptf-3/F28C6.2	WBGene00009203	AP-2	18 (p=0.0007)	17 (p=0.0114)
egl-44	WBGene00001208	TEA/ATTS	18 (p=0.0439)	25 (p=0.0092)
mxl-1	WBGene00003509	bHLH	17 (p=0.0212)	23 (p=0.0195)	16 (p=0.0273)
tag-68	WBGene00006445	MH1	16 (p=0.0183)	26 (p=0.0012)		83 (p=0.0065)
Y71H2AM.17	WBGene00022182	HMG box	14 (p=0.0448)	27 (p=0.0099)
C04F5.9	WBGene00015451	ZF - C2H2	14 (p=0.0379)	12 (p=0.0387)
B0035.1	WBGene00007105	ZF - C2H2	12 (p=0.0364)	22 (p=0.0039)
hmg-4	WBGene00001974	HMG box	7 (p=0.0296)	17 (p=0.0265)
lin-36	WBGene00003021	ZF - C2H2, ZF - THAP	12 (p=0.0303)	17 (p=0.0239)
unc-98	WBGene00006827	ZF - C2H2 - 3 fingers	13 (p=0.0434)	25 (p=0.0380)
nhr-97	WBGene00003687	ZF - NHR	15 (p=0.0132)	22 (p=0.0174)
F26F4.8	WBGene00005011	ZF - C2H2	20 (p=0.0171)	31 (p=0.0048)	18 (p=0.0330)
zim-2	WBGene00011600	ZF - C2H2	21 (p=0.0132)	34 (p=0.0366)		47 (p=0.0224)
ZK546.5	WBGene00022762	ZF - C2H2	22 (p=0.0014)	41 (p=0.0028)	25 (p=0.0053)
nfi-1	WBGene00003592	MH1	27 (p=0.0047)	26 (p=0.0110)
gei-8	WBGene00001565	MYB	29 (p<0.0001)	17 (p=0.0288)

## Sheet: SYGL-1+
RNAi knockdown of these TFs caused significant changes in the numbers of SYGL-1 positive cells.
			Nuclei counting results (increase, decrease, by X% of control)
Gene.Public.Name	WormBase Gene ID	DNA binding domain	PZ	TZ	SYGL-1+	mitotic index
gei-11/snpc-4	WBGene00001568	MYB		34 (p=0.0016)	43 (p=0.0005)
C38D4.7	WBGene00008007	ZF - C2H2			42 (p=0.0039)
R10E4.11	WBGene00011206	ZF - C2H2			40 (p=0.0024)
tbx-33	WBGene00006552	T-box			38 (p=0.0031)
lin-11	WBGene00003000	HD - LIM			34 (p=0.0085)
nhr-49	WBGene00003639	ZF - NHR	12 (p=0.0317)		29 (p=0.0219)
egl-18	WBGene00001186	ZF - GATA			28 (p=0.0140)
xnd-1	WBGene00001514	AT Hook x2	24 (p<0.0001)	21 (p=0.0114)	25 (p=0.0008)
efl-2	WBGene00001162	WH - TDP	16 (p=0.0096)		25 (p=0.0070)
ceh-20	WBGene00000443	HD - TALE			25 (p=0.0325)
T22C8.3	WBGene00011924	ZF - C2H2	12 (p=0.0476)		24 (p=0.0428)
atfs-1	WBGene00013878	bZIP		24 (p=0.0376)	24 (p=0.0375)
Y67H2A.10	WBGene00013465	ZF - C2H2			23 (p=0.0043)
F39B2.1	WBGene00009553	ZF - C2H2		24 (p=0.0305)	20 (p=0.0184)
sma-9	WBGene00004862	ZF - C2H2			18 (p=0.0027)
nhr-84	WBGene00003674	ZF - NHR	25 (p=0.0004)		18 (p=0.0474)
nhr-182	WBGene00018265	ZF - NHR		21 (p=0.0492)	17 (p=0.0352)
mxl-1	WBGene00003509	bHLH	17 (p=0.0212)	23 (p=0.0195)	16 (p=0.0273)
bed-3	WBGene00009133	ZF - BED	21 (p=0.0055)		16 (p=0.0167)	86 (p=0.0262)
nhr-256	WBGene00022805	ZF - NHR			16 (p=0.0294)
lin-54	WBGene00003037	CxC			15 (p=0.0118)
H20J04.2	WBGene00019217	AT Hook			14 (p=0.0437)
nhr-100	WBGene00003690	ZF - NHR			14 (p=0.0162)	40 (p=0.0473)
slr-2	WBGene00013350	ZF - C2H2			14 (p=0.0239)
hmg-3	WBGene00001973	HMG box	18 (p<0.0001)	33 (p=0.0009)	14 (p=0.0353)	88 (p=0.0095)
nhr-122	WBGene00003712	ZF - NHR			12 (p=0.0456)
ceh-32	WBGene00000453	HD - SIX	16 (p=0.0173)		12 (p=0.0373)
nhr-146	WBGene00045255	ZF - NHR	20 (p=0.0037)		12 (p=0.0455)	57 (p=0.0151)
C46E10.9	WBGene00016713	ZF - C2H2			12 (p=0.0444)
C18C4.5	WBGene00015966	bZIP	14 (p=0.0429)		13 (p=0.0275)	53 (p=0.0166)
him-17	WBGene00001874	ZF - THAP			14 (p=0.0479)
nhr-19	WBGene00003618	ZF - NHR		18 (p=0.0163)	14 (p=0.0497)
elt-6	WBGene00001253	ZF - GATA			15 (p=0.0438)
K11D2.4	WBGene00010770	ZF - C2H2			16 (p=0.0234)
W08E12.1	WBGene00021082	bZIP			16 (p=0.0102)
Y18D10A.1	WBGene00012474	AT Hook x2			17 (p=0.0139)
F26F4.8	WBGene00005011	ZF - C2H2	20 (p=0.0171)	31 (p=0.0048)	18 (p=0.0330)
tbx-36	WBGene00006555	T-box			18 (p=0.0068)
nhr-22	WBGene00003621	ZF - NHR			20 (p=0.0045)
dnj-11	WBGene00001029	MYB			20 (p=0.0175)
hmg-5	WBGene00001975	HMG box		27 (p=0.0208)	22 (p=0.0131)
ZNF-593	WBGene00013236	ZF - C2H2			22 (p=0.0127)
ZK185.1	WBGene00022681	ZF - C2H2			22 (p=0.0168)
K09H9.7	WBGene00019598	ZF - C2H2	18 (p=0.0143)		24 (p=0.0083)	43 (p=0.0348)
ZK546.5	WBGene00022762	ZF - C2H2	22 (p=0.0014)	41 (p=0.0028)	25 (p=0.0053)
zip-2	WBGene00019327	bZIP		32 (p=0.0001)	26 (p=0.0062)
nhr-69	WBGene00003659	ZF - NHR			26 (p=0.0211)	45 (p=0.0102)
tag-347/spe-44	WBGene00007732	AT Hook, SAND		28 (p=0.0030)	30 (p=0.0198)
C01F6.9	WBGene00007223	ZF - C2H2			30 (p=0.0095)
F41H10.4	WBGene00018317	bZIP	27 (p=0.0025)		35 (p=0.0308)
lir-3	WBGene00003046	ZF - C2H2			35 (p=0.0003)
mxl-2	WBGene00003510	bHLH			35 (p=0.0003)
ztf-27	WBGene00011661	ZF - C2H2			36 (p=0.0003)
elf-1	WBGene00016029	WH - ETS	21 (p=0.0066)		53 (p=0.0003)

## Sheet: MI
RNAi knockdown of these TFs caused significant changes mitotic index.
			Nuclei counting results (increase, decrease, by X% of control)
Gene.Public.Name	WormBase Gene ID	DNA binding domain	PZ	TZ	SYGL-1+	mitotic index
C18C4.5	WBGene00015966	bZIP	14 (p=0.0429)		13 (p=0.0275)	53 (p=0.0166)
zim-2	WBGene00011600	ZF - C2H2	21 (p=0.0132)	34 (p=0.0366)		47 (p=0.0224)
nhr-69	WBGene00003659	ZF - NHR			26 (p=0.0211)	45 (p=0.0102)
K09H9.7	WBGene00019598	ZF - C2H2	18 (p=0.0143)		24 (p=0.0083)	43 (p=0.0348)
K09A11.1	WBGene00010704	ZF - BED	12 (p=0.0259)			43 (p=0.0104)
nhr-100	WBGene00003690	ZF - NHR			14 (p=0.0162)	40 (p=0.0473)
T26A5.8	WBGene00020823	CBF				38 (p=0.0227)
lin-28	WBGene00003014	COLD BOX		17 (p=0.0493)		36 (p=0.0105)
ceh-38	WBGene00000459	HD - CUT				35 (p=0.0387)
ztf-17	WBGene00011639	ZF - C2H2 - 2 fingers		26 (p=0.0132)		33 (p=0.0441)
nhr-20	WBGene00003619	ZF - NHR				30 (p=0.0218)
tra-1	WBGene00006604	ZF - C2H2				24 (p=0.0499)
egrh-1	WBGene00007772	ZF - C2H2				43 (p=0.0452)
ztf-22	WBGene00012988	ZF - C2H2 - 1 finger				44 (p=0.0167)
nhr-146	WBGene00045255	ZF - NHR	20 (p=0.0037)		12 (p=0.0455)	57 (p=0.0151)
R05D3.3	WBGene00019878	ZF - C2H2 - 1 finger	27 (p<0.0001)	22 (p=0.0041)		58 (p=0.0049)
daf-3	WBGene00000899	MH1	25 (p=0.0004)	14 (p=0.0463)		66 (p=0.0185)
hmg-11	WBGene00001976	AT Hook x3				69 (p=0.0047)
pqn-21	WBGene00004111	ZF - C2H2 - 1 finger	38 (p<0.0001)	31 (p=0.0002)		80 (p=0.0031)
tag-68	WBGene00006445	MH1	16 (p=0.0183)	26 (p=0.0012)		83 (p=0.0065)
ztf-12	WBGene00006342	ZF - C2H2	17 (p=0.0017)			84 (p=0.0030)
bed-3	WBGene00009133	ZF - BED	21 (p=0.0055)		16 (p=0.0167)	86 (p=0.0262)
hmg-3	WBGene00001973	HMG box	18 (p<0.0001)	33 (p=0.0009)	14 (p=0.0353)	88 (p=0.0095)
hsf-1	WBGene00002004	WH - HSF	28 (p<0.0001)			114 (p=0.0161)

## Sheet: PZ all
RNAi knockdown of these TFs caused significant changes in multiple regions.
PZ + SYGL-1				Nuclei counting results (increase, decrease, by X% of control)
	Gene.Public.Name	WormBase Gene ID	DNA binding domain	PZ	TZ	SYGL-1+	mitotic index
	nhr-84	WBGene00003674	ZF - NHR	25 (p=0.0004)		18 (p=0.0474)
	xnd-1	WBGene00001514	AT Hook x2	24 (p<0.0001)	21 (p=0.0114)	25 (p=0.0008)
	bed-3	WBGene00009133	ZF - BED	21 (p=0.0055)		16 (p=0.0167)	86 (p=0.0262)
	nhr-146	WBGene00045255	ZF - NHR	20 (p=0.0037)		12 (p=0.0455)	57 (p=0.0151)
	hmg-3	WBGene00001973	HMG box	18 (p<0.0001)	33 (p=0.0009)	14 (p=0.0353)	88 (p=0.0095)
	mxl-1	WBGene00003509	bHLH	17 (p=0.0212)	23 (p=0.0195)	16 (p=0.0273)
	ceh-32	WBGene00000453	HD - SIX	16 (p=0.0173)		12 (p=0.0373)
	efl-2	WBGene00001162	WH - TDP	16 (p=0.0096)		25 (p=0.0070)
	T22C8.3	WBGene00011924	ZF - C2H2	12 (p=0.0476)		24 (p=0.0428)
	nhr-49	WBGene00003639	ZF - NHR	12 (p=0.0317)		29 (p=0.0219)
	C18C4.5	WBGene00015966	bZIP	14 (p=0.0429)		13 (p=0.0275)	53 (p=0.0166)
	K09H9.7	WBGene00019598	ZF - C2H2	18 (p=0.0143)		24 (p=0.0083)	43 (p=0.0348)
	F26F4.8	WBGene00005011	ZF - C2H2	20 (p=0.0171)	31 (p=0.0048)	18 (p=0.0330)
	elf-1	WBGene00016029	WH - ETS	21 (p=0.0066)		53 (p=0.0003)
	ZK546.5	WBGene00022762	ZF - C2H2	22 (p=0.0014)	41 (p=0.0028)	25 (p=0.0053)
	F41H10.4	WBGene00018317	bZIP	27 (p=0.0025)		35 (p=0.0308)
PZ + MI				Nuclei counting results (increase, decrease, by X% of control)
	Gene.Public.Name	WormBase Gene ID	DNA binding domain	PZ	TZ	SYGL-1+	mitotic index
	pqn-21	WBGene00004111	ZF - C2H2 - 1 finger	38 (p<0.0001)	31 (p=0.0002)		80 (p=0.0031)
	hsf-1	WBGene00002004	WH - HSF	28 (p<0.0001)			114 (p=0.0161)
	R05D3.3	WBGene00019878	ZF - C2H2 - 1 finger	27 (p<0.0001)	22 (p=0.0041)		58 (p=0.0049)
	daf-3	WBGene00000899	MH1	25 (p=0.0004)	14 (p=0.0463)		66 (p=0.0185)
	bed-3	WBGene00009133	ZF - BED	21 (p=0.0055)		16 (p=0.0167)	86 (p=0.0262)
	nhr-146	WBGene00045255	ZF - NHR	20 (p=0.0037)		12 (p=0.0455)	57 (p=0.0151)
	hmg-3	WBGene00001973	HMG box	18 (p<0.0001)	33 (p=0.0009)	14 (p=0.0353)	88 (p=0.0095)
	ztf-12	WBGene00006342	ZF - C2H2	17 (p=0.0017)			84 (p=0.0030)
	tag-68	WBGene00006445	MH1	16 (p=0.0183)	26 (p=0.0012)		83 (p=0.0065)
	K09A11.1	WBGene00010704	ZF - BED	12 (p=0.0259)			43 (p=0.0104)
	C18C4.5	WBGene00015966	bZIP	14 (p=0.0429)		13 (p=0.0275)	53 (p=0.0166)
	K09H9.7	WBGene00019598	ZF - C2H2	18 (p=0.0143)		24 (p=0.0083)	43 (p=0.0348)
	zim-2	WBGene00011600	ZF - C2H2	21 (p=0.0132)	34 (p=0.0366)		47 (p=0.0224)
PZ + SYGL-1 + MI				Nuclei counting results (increase, decrease, by X% of control)
	Gene.Public.Name	WormBase Gene ID	DNA binding domain	PZ	TZ	SYGL-1+	mitotic index
	bed-3	WBGene00009133	ZF - BED	21 (p=0.0055)		16 (p=0.0167)	86 (p=0.0262)
	nhr-146	WBGene00045255	ZF - NHR	20 (p=0.0037)		12 (p=0.0455)	57 (p=0.0151)
	hmg-3	WBGene00001973	HMG box	18 (p<0.0001)	33 (p=0.0009)	14 (p=0.0353)	88 (p=0.0095)
	C18C4.5	WBGene00015966	bZIP	14 (p=0.0429)		13 (p=0.0275)	53 (p=0.0166)
	K09H9.7	WBGene00019598	ZF - C2H2	18 (p=0.0143)		24 (p=0.0083)	43 (p=0.0348)
