# Supplementary material for: A Transcription Factor Functional Atlas of Germline Development
Source: Research Square preprint supplement (doi:10.21203/rs.3.rs-3880498/v1), 2024-01-26
Supplement: Supplementary file 11 [file e8b68decfef9e64e3170939a.xlsx]

## Sheet: Germline RNA Seq
Gene.Public.Name	WormBase Gene ID	Biotype	WT-R1 CPM	WT-R2 CPM	WT-R3 CPM
ztf-6	WBGene00012317	protein_coding	17.215	13.941	17.233
tbx-34	WBGene00006553	protein_coding	16.389	1.542	7.145
C46E10.8	WBGene00016712	protein_coding	15.218	21.33	17.053
lim-6	WBGene00002988	protein_coding	12.739	11.5	9.067
mbr-1	WBGene00011315	protein_coding	10.88	15.355	5.644
fkh-6	WBGene00001438	protein_coding	9.227	9.316	7.506
lim-7	WBGene00002989	protein_coding	7.23	6.489	8.707
ZK686.5	WBGene00022795	protein_coding	7.23	1.413	3.603
nhr-133	WBGene00003723	protein_coding	5.371	5.204	6.065
sup-37	WBGene00006342	protein_coding	5.165	5.525	7.566
T20H4.2	WBGene00020635	protein_coding	5.096	1.542	3.242
ceh-18	WBGene00000441	protein_coding	4.269	2.634	3.663
nhr-105	WBGene00003695	protein_coding	4.132	2.827	3.483
zip-3	WBGene00012330	protein_coding	4.063	2.891	3.483
nhr-57	WBGene00003647	protein_coding	3.994	1.349	1.021
aptf-4	WBGene00009202	protein_coding	3.856	2.313	6.785
ceh-41	WBGene00000462	protein_coding	3.719	3.469	4.744
gei-3	WBGene00001560	protein_coding	3.512	3.726	5.284
ets-5	WBGene00016600	protein_coding	3.512	2.249	3.603
nhr-87	WBGene00003677	protein_coding	3.374	2.763	2.342
nhr-50	WBGene00003640	protein_coding	3.374	2.377	4.684
efl-2	WBGene00001162	protein_coding	3.099	4.626	5.764
nhr-62	WBGene00003652	protein_coding	3.03	1.285	0.42
nhr-286	WBGene00044699	protein_coding	2.892	1.67	1.801
sem-2	WBGene00004771	protein_coding	2.823	4.305	3.242
bar-1	WBGene00000238	protein_coding	2.686	3.855	1.981
egrh-2	WBGene00043705	protein_coding	2.686	3.534	5.344
nhr-56	WBGene00003646	protein_coding	2.548	1.028	1.381
nhr-134	WBGene00003724	protein_coding	2.41	3.212	2.942
sma-4	WBGene00004858	protein_coding	2.272	1.285	2.282
ceh-6	WBGene00000431	protein_coding	2.066	1.606	0.6
K11D2.4	WBGene00010770	protein_coding	1.79	0.835	1.861
hlh-12	WBGene00001956	protein_coding	1.722	2.891	0.961
F21A9.2	WBGene00017651	protein_coding	1.722	1.156	0.961
sma-2	WBGene00004856	protein_coding	1.653	1.606	1.321
T22C8.4	WBGene00011925	protein_coding	1.515	0.642	1.141
elt-3	WBGene00001251	protein_coding	1.515	0.257	1.621
ceh-48	WBGene00015934	protein_coding	1.446	0.064	0.961
nhr-90	WBGene00003680	protein_coding	1.308	0.707	1.141
bcl-11	WBGene00017430	protein_coding	1.24	0.964	0.781
nhr-116	WBGene00003706	protein_coding	1.171	1.028	0.961
nhr-131	WBGene00003721	protein_coding	1.171	0.899	1.681
nhr-31	WBGene00003625	protein_coding	1.102	1.221	1.081
nhr-158	WBGene00015901	protein_coding	1.102	1.221	0.48
nhr-80	WBGene00003670	protein_coding	1.102	0.707	1.021
T18D3.7	WBGene00011824	protein_coding	1.102	0.514	0.961
zip-9	WBGene00077761	protein_coding	1.102	0.257	0.961
nhr-101	WBGene00003691	protein_coding	0.964	1.349	1.201
fkh-5	WBGene00001437	protein_coding	0.964	0.899	0.781
ZK185.1	WBGene00022681	protein_coding	0.964	0.257	0.12
B0310.2	WBGene00015138	protein_coding	0.895	1.735	0.66
nhr-206	WBGene00011097	protein_coding	0.895	1.67	1.801
nhr-207	WBGene00011098	protein_coding	0.895	1.028	0.901
nhr-231	WBGene00012449	protein_coding	0.895	0.642	0.901
egl-13	WBGene00001182	protein_coding	0.826	0.514	0.36
C32E8.1	WBGene00016320	protein_coding	0.826	0.193	0.54
nhr-58	WBGene00003648	protein_coding	0.757	0.514	1.141
nhr-107	WBGene00003697	protein_coding	0.757	0.193	0.961
nhr-91	WBGene00003681	protein_coding	0.689	1.156	1.081
gmeb-2	WBGene00010010	protein_coding	0.689	1.028	1.801
nhr-226	WBGene00020850	protein_coding	0.689	0.45	0.721
pqm-1	WBGene00004096	protein_coding	0.689	0.45	0.42
nhr-225	WBGene00020849	protein_coding	0.62	1.028	1.201
nhr-11	WBGene00003610	protein_coding	0.62	0.964	1.141
nhr-135	WBGene00003725	protein_coding	0.62	0.835	0.18
nhr-96	WBGene00003686	protein_coding	0.62	0.514	0.24
nhr-239	WBGene00021848	protein_coding	0.62	0.45	0.54
nhr-168	WBGene00008221	protein_coding	0.62	0.45	0.3
ceh-62	WBGene00011069	protein_coding	0.62	0.321	0.24
nhr-55	WBGene00003645	protein_coding	0.62	0.064	0.36
nhr-18	WBGene00003617	protein_coding	0.62	0.064	0.18
Y82E9BR.1	WBGene00022334	protein_coding	0.551	0.964	1.321
nhr-136	WBGene00003726	protein_coding	0.551	0.707	2.042
klf-1	WBGene00018990	protein_coding	0.551	0.514	0.54
odd-2	WBGene00003846	protein_coding	0.551	0.257	0.3
nhr-142	WBGene00018430	protein_coding	0.551	0.193	0.18
nhr-266	WBGene00018993	protein_coding	0.551	0.128	0.721
ztf-26	WBGene00010137	protein_coding	0.551	0.064	0.18
hbl-1	WBGene00001824	protein_coding	0.482	1.221	0.3
nhr-145	WBGene00012703	protein_coding	0.482	1.092	1.261
nhr-115	WBGene00003705	protein_coding	0.482	0.899	0.18
madf-10	WBGene00013717	protein_coding	0.482	0.707	1.021
nhr-177	WBGene00017503	protein_coding	0.482	0.578	0.36
nhr-16	WBGene00003615	protein_coding	0.482	0.385	1.021
nhr-94	WBGene00003684	protein_coding	0.482	0.385	0.66
nhr-208	WBGene00011099	protein_coding	0.482	0.193	0.36
sem-4	WBGene00004773	protein_coding	0.482	0.193	0.18
nhr-178	WBGene00017510	protein_coding	0.482	0.064	0.3
W04B5.2	WBGene00021019	protein_coding	0.413	1.542	0.36
mxl-3	WBGene00003511	protein_coding	0.413	0.514	1.441
mab-3	WBGene00003100	protein_coding	0.413	0.385	0.901
zip-10	WBGene00012101	protein_coding	0.413	0.321	0.6
pat-9	WBGene00003933	protein_coding	0.413	0.321	0.24
tag-97	WBGene00006462	protein_coding	0.413	0.193	0.3
nhr-5	WBGene00003604	protein_coding	0.413	0.128	0.06
nhr-108	WBGene00003698	protein_coding	0.344	0.514	0.36
madf-4	WBGene00011575	protein_coding	0.344	0.45	1.381
nhr-153	WBGene00007546	protein_coding	0.344	0.45	0.721
nhr-183	WBGene00018266	protein_coding	0.344	0.321	0.06
nhr-92	WBGene00003682	protein_coding	0.344	0.257	1.381
T07D10.3	WBGene00011583	protein_coding	0.344	0.193	0.24
nhr-232	WBGene00012494	protein_coding	0.344	0.193	0.06
hlh-33	WBGene00021446	protein_coding	0.275	1.156	0.54
end-3	WBGene00001311	protein_coding	0.275	0.899	1.561
nhr-98	WBGene00003688	protein_coding	0.275	0.578	0.48
madf-9	WBGene00022608	protein_coding	0.275	0.45	0.3
C06E2.1	WBGene00015527	protein_coding	0.275	0.385	0.18
fkh-10	WBGene00001442	protein_coding	0.275	0.385	0.12
hlh-16	WBGene00001960	protein_coding	0.275	0.257	0.841
atf-8	WBGene00017535	protein_coding	0.275	0.257	0.36
ceh-19	WBGene00000442	protein_coding	0.275	0.257	0.36
ngn-1	WBGene00003595	protein_coding	0.275	0.193	0.36
ceh-10	WBGene00000435	protein_coding	0.275	0.193	0.36
nhr-120	WBGene00003710	protein_coding	0.275	0.193	0.18
Y55F3AM.14	WBGene00021931	protein_coding	0.275	0.128	0.3
nhr-112	WBGene00003702	protein_coding	0.275	0.128	0.06
ahr-1	WBGene00000096	protein_coding	0.275	0.064	0.6
cebp-1	WBGene00016997	protein_coding	0.275	0.064	0.42
dac-1	WBGene00000895	protein_coding	0.275	0.064	0.42
nhr-205	WBGene00011002	protein_coding	0.275	0.064	0.12
nhr-88	WBGene00003678	protein_coding	0.207	0.514	0.781
ceh-51	WBGene00013583	protein_coding	0.207	0.257	0.36
chpf-2	WBGene00019108	protein_coding	0.207	0.257	0.18
zag-1	WBGene00006970	protein_coding	0.207	0.257	0.06
odd-1	WBGene00003845	protein_coding	0.207	0.128	0.36
nhr-209	WBGene00011100	protein_coding	0.207	0.064	0.24
mef-2	WBGene00003182	protein_coding	0.207	0.064	0.12
nhr-143	WBGene00019116	protein_coding	0.138	0.578	1.861
F21G4.5	WBGene00009026	protein_coding	0.138	0.514	0.18
lin-48	WBGene00003033	protein_coding	0.138	0.257	0.66
nhr-230	WBGene00012446	protein_coding	0.138	0.193	0.54
nhr-129	WBGene00003719	protein_coding	0.138	0.193	0.24
nhr-109	WBGene00003699	protein_coding	0.138	0.193	0.12
ceh-14	WBGene00000438	protein_coding	0.138	0.128	0.24
tbx-7	WBGene00006544	protein_coding	0.138	0.128	0.06
sptf-2	WBGene00011926	protein_coding	0.138	0.064	1.021
ceh-8	WBGene00000433	protein_coding	0.138	0.064	0.42
ces-1	WBGene00000468	protein_coding	0.138	0.064	0.24
hlh-28	WBGene00001967	protein_coding	0.138	0.064	0.06
hlh-4	WBGene00001951	protein_coding	0.069	0.385	0.24
lin-14	WBGene00003003	protein_coding	0.069	0.385	0.18
nhr-128	WBGene00003718	protein_coding	0.069	0.385	0.06
ceh-16	WBGene00000439	protein_coding	0.069	0.257	0.66
klu-1	WBGene00013970	protein_coding	0.069	0.257	0.3
ceh-2	WBGene00000429	protein_coding	0.069	0.257	0.24
nhr-179	WBGene00017512	protein_coding	0.069	0.257	0.06
nhr-210	WBGene00020015	protein_coding	0.069	0.257	0.06
nhr-130	WBGene00003720	protein_coding	0.069	0.193	0.3
nhr-176	WBGene00008830	protein_coding	0.069	0.193	0.18
nhr-238	WBGene00021611	protein_coding	0.069	0.193	0.06
nhr-125	WBGene00003715	protein_coding	0.069	0.128	0.36
end-1	WBGene00001310	protein_coding	0.069	0.128	0.06
pros-1	WBGene00000448	protein_coding	0.069	0.064	0.42
nhr-43	WBGene00003633	protein_coding	0.069	0.064	0.36
bnc-1	WBGene00044791	protein_coding	0.069	0.064	0.3
ztf-20	WBGene00012702	protein_coding	0.069	0.064	0.24
dmd-3	WBGene00012832	protein_coding	0.069	0.064	0.18
nhr-103	WBGene00003693	protein_coding	0.069	0.064	0.18
tbx-40	WBGene00006559	protein_coding	0.069	0.064	0.06
nhr-83	WBGene00003673	pseudogene	0.413	0.385	0.54
anr-5	WBGene00219705	antisense	1.859	0.064	0.54
anr-8	WBGene00219575	antisense	1.033	1.349	1.681
anr-36	WBGene00219659	antisense	0.482	0.835	0.781
anr-34	WBGene00219701	antisense	0.138	0.128	0.3
anr-20	WBGene00219581	antisense	0.069	0.193	0
anr-7	WBGene00219607	antisense	0.069	0.064	0.06
anr-27	WBGene00219647	antisense	0.069	0.064	0.06
F48C1.15	WBGene00236798	antisense	0	0.128	0.06
linc-7	WBGene00219609	lincRNA	226.968	204.817	247.026
linc-63	WBGene00219725	lincRNA	4.614	6.296	5.524
linc-29	WBGene00189951	lincRNA	2.617	3.084	4.984
linc-6	WBGene00219700	lincRNA	2.548	3.662	3.182
linc-82	WBGene00219570	lincRNA	2.548	0.193	1.081
linc-8	WBGene00219707	lincRNA	1.928	1.542	0.6
linc-21	WBGene00219688	lincRNA	1.928	1.221	1.141
linc-77	WBGene00219741	lincRNA	1.859	3.212	1.981
linc-4	WBGene00219306	lincRNA	1.515	1.349	0.901
linc-44	WBGene00219675	lincRNA	1.308	2.441	2.642
linc-36	WBGene00219694	lincRNA	1.24	0	0.901
linc-45	WBGene00219661	lincRNA	1.171	1.028	0.24
linc-9	WBGene00219678	lincRNA	1.033	1.349	1.261
linc-11	WBGene00219758	lincRNA	0.757	1.221	0.841
linc-22	WBGene00219699	lincRNA	0.757	0.964	1.081
linc-91	WBGene00219746	lincRNA	0.689	0.642	0.54
linc-66	WBGene00219667	lincRNA	0.689	0	0.24
linc-129	WBGene00219601	lincRNA	0.62	0.064	0.12
linc-109	WBGene00219615	lincRNA	0.551	0.128	0.12
linc-102	WBGene00219564	lincRNA	0.482	0.514	1.321
linc-1	WBGene00194659	lincRNA	0.413	1.735	0.781
linc-20	WBGene00219736	lincRNA	0.413	0.771	0.36
linc-14	WBGene00195060	lincRNA	0.275	0.707	0.06
linc-30	WBGene00219749	lincRNA	0.275	0.385	0.66
linc-17	WBGene00219755	lincRNA	0.275	0.193	0.901
linc-41	WBGene00219689	lincRNA	0.275	0.128	0
linc-89	WBGene00219646	lincRNA	0.275	0.064	0.06
linc-170	WBGene00219585	lincRNA	0.275	0	0.18
linc-35	WBGene00219680	lincRNA	0.207	0.964	0.36
linc-34	WBGene00194814	lincRNA	0.207	0.642	0.66
linc-16	WBGene00219728	lincRNA	0.207	0.321	0.54
linc-40	WBGene00219770	lincRNA	0.207	0.321	0
linc-2	WBGene00219720	lincRNA	0.207	0.128	0.3
linc-81	WBGene00219636	lincRNA	0.207	0.128	0.24
linc-42	WBGene00219718	lincRNA	0.138	0.514	0.06
linc-61	WBGene00195170	lincRNA	0.138	0.385	0
linc-19	WBGene00219660	lincRNA	0.138	0.321	0.6
linc-116	WBGene00219726	lincRNA	0.138	0.193	0.24
linc-151	WBGene00219602	lincRNA	0.138	0.064	0.36
linc-76	WBGene00219619	lincRNA	0.138	0.064	0.06
linc-65	WBGene00219652	lincRNA	0.138	0	0.12
linc-60	WBGene00219618	lincRNA	0.069	0.257	0.6
linc-75	WBGene00219685	lincRNA	0.069	0.257	0.06
linc-128	WBGene00219734	lincRNA	0.069	0.064	0.06
linc-103	WBGene00219743	lincRNA	0.069	0.064	0
linc-127	WBGene00219704	lincRNA	0.069	0.064	0
linc-32	WBGene00219773	lincRNA	0.069	0	0
linc-46	WBGene00219748	lincRNA	0	0.835	0.18
linc-85	WBGene00219754	lincRNA	0	0.128	0.06
linc-15	WBGene00219571	lincRNA	0	0	0
linc-24	WBGene00219771	lincRNA	0	0	0
mir-58.1	WBGene00003286	miRNA	0.207	0.321	0.36
mir-1828	WBGene00077719	miRNA	0.207	0.128	0.3
mir-8196.2	WBGene00219810	miRNA	0.138	0	0.12
mir-4938	WBGene00219266	miRNA	0.069	0.514	0.66
mir-246	WBGene00003340	miRNA	0.069	0.064	0.12
mir-239.1	WBGene00003332	miRNA	0.069	0	0.24
mir-2219	WBGene00194830	miRNA	0.069	0	0.06
mir-4932	WBGene00219227	miRNA	0	0.257	0.18
mir-41	WBGene00003269	miRNA	0	0.193	0.12
mir-8205	WBGene00255577	miRNA	0	0.193	0.06
mir-2207	WBGene00194804	miRNA	0	0.128	0.18
mir-4934	WBGene00219229	miRNA	0	0.128	0.06
mir-51	WBGene00003279	miRNA	0	0.064	0.06
C36C9.10	WBGene00219849	ncRNA	106.735	155.669	104.478
F09E10.15	WBGene00219886	ncRNA	87.73	98.361	72.054
C05D9.12	WBGene00219800	ncRNA	44.209	49.984	11.409
C06A1.12	WBGene00219803	ncRNA	42.281	46.9	42.332
F08H9.15	WBGene00235106	ncRNA	27.82	1.606	13.03
Y47G6A.36	WBGene00220165	ncRNA	26.03	30.388	21.256
T05E11.9	WBGene00014505	ncRNA	23.826	23.386	28.281
CD4.10	WBGene00022970	ncRNA	16.871	15.805	20.776
F20C5.10	WBGene00219908	ncRNA	16.527	14.134	13.991
T05E12.10	WBGene00077787	ncRNA	10.26	14.648	17.413
W05H9.3	WBGene00021050	ncRNA	10.192	9.573	9.487
C30E1.9	WBGene00022951	ncRNA	10.054	7.71	16.092
R166.6	WBGene00014492	ncRNA	9.778	8.545	9.007
F19F10.13	WBGene00219905	ncRNA	8.263	4.048	4.864
W06H8.5	WBGene00023159	ncRNA	8.195	5.461	5.164
F22H10.10	WBGene00219912	ncRNA	7.988	6.36	3.122
C04G2.14	WBGene00255426	ncRNA	7.162	7.838	8.646
Y41C4A.29	WBGene00206423	ncRNA	5.44	5.718	4.623
R10E11.13	WBGene00220040	ncRNA	4.82	3.534	5.824
F01G12.19	WBGene00219876	ncRNA	4.614	5.011	0.721
Y53F4B.45	WBGene00044728	ncRNA	4.476	1.542	4.143
F53H2.4	WBGene00195151	ncRNA	3.305	3.084	2.702
T11G6.11	WBGene00255441	ncRNA	2.754	0	0.6
K07G5.7	WBGene00220010	ncRNA	2.686	2.249	1.621
F32A5.9	WBGene00023021	ncRNA	2.686	2.184	0.721
Y105E8A.36	WBGene00195175	ncRNA	2.548	1.927	2.282
R106.7	WBGene00220049	ncRNA	2.204	1.67	1.201
C38C6.8	WBGene00045388	ncRNA	1.997	1.799	3.242
Y69A2AR.49	WBGene00235341	ncRNA	1.997	0.128	0.48
Y105C5A.1284	WBGene00220223	ncRNA	1.928	3.919	1.921
Y67D8A.10	WBGene00235356	ncRNA	1.722	2.184	2.942
R10D12.18	WBGene00194678	ncRNA	1.653	1.413	2.642
K08B5.8	WBGene00220011	ncRNA	1.584	1.606	2.042
Y48G10A.9	WBGene00220171	ncRNA	1.515	1.799	1.561
K07C10.3	WBGene00194851	ncRNA	1.377	1.285	1.741
F31E9.11	WBGene00195233	ncRNA	1.308	0.835	0.3
Y48G8AL.20	WBGene00249808	ncRNA	1.171	0.45	0.6
Y111B2A.34	WBGene00220228	ncRNA	1.102	0.964	0.901
Y37E3.24	WBGene00195032	ncRNA	0.826	1.221	1.081
B0025.7	WBGene00219778	ncRNA	0.826	0.964	1.441
F25G6.16	WBGene00197326	ncRNA	0.826	0.321	1.441
F59C6.19	WBGene00219987	ncRNA	0.757	0.514	2.582
C01B12.9	WBGene00022904	ncRNA	0.689	0.707	0.36
C05D2.11	WBGene00022910	ncRNA	0.689	0.321	0.66
Y75B12B.16	WBGene00220208	ncRNA	0.62	0.899	0.66
F40F11.6	WBGene00219941	ncRNA	0.62	0.707	0.36
ZC155.8	WBGene00195016	ncRNA	0.62	0.321	1.321
rpr-1	WBGene00045238	ncRNA	0.551	0.321	1.321
Y67D8C.12	WBGene00023187	ncRNA	0.482	0.128	0.06
Y116A8C.48	WBGene00045043	ncRNA	0.413	0.771	0.24
Y105E8B.15	WBGene00220226	ncRNA	0.413	0.514	0.901
ZK662.8	WBGene00200998	ncRNA	0.413	0.321	0.12
Y116A8C.471	WBGene00255709	ncRNA	0.413	0	0.06
Y108G3AL.10	WBGene00235163	ncRNA	0.344	0.514	0
F19C6.12	WBGene00219904	ncRNA	0.344	0.45	0.841
T22C1.17	WBGene00220081	ncRNA	0.344	0.385	0.3
ZC132.10	WBGene00195266	ncRNA	0.344	0.064	0.24
T28F4.7	WBGene00198042	ncRNA	0.344	0.064	0.06
ZK265.11	WBGene00045370	ncRNA	0.275	0.45	0.54
tts-1	WBGene00006650	ncRNA	0.275	0.385	0.24
W04C9.8	WBGene00235387	ncRNA	0.275	0.193	0.3
C48G7.4	WBGene00197665	ncRNA	0.275	0.128	0.42
C25D7.17	WBGene00196008	ncRNA	0.275	0	0.12
T27A8.6	WBGene00195439	ncRNA	0.207	0.642	1.021
VF15C11L.2	WBGene00201458	ncRNA	0.207	0.45	0.36
T26A5.10	WBGene00198530	ncRNA	0.207	0.385	0.18
F09E5.22	WBGene00201570	ncRNA	0.207	0.385	0.18
T09F3.6	WBGene00198634	ncRNA	0.207	0.321	0
ZK809.10	WBGene00195005	ncRNA	0.207	0.257	0.3
T03G6.6	WBGene00201028	ncRNA	0.207	0.257	0.24
F27C1.18	WBGene00219918	ncRNA	0.207	0.128	0.24
F55A12.13	WBGene00197234	ncRNA	0.207	0.128	0.12
F39E9.17	WBGene00195024	ncRNA	0.207	0.064	0.06
Y105E8A.50	WBGene00220225	ncRNA	0.207	0	0.3
C18H9.12	WBGene00219826	ncRNA	0.207	0	0
F46F3.14	WBGene00199871	ncRNA	0.138	0.514	0.3
C50F4.17	WBGene00195366	ncRNA	0.138	0.385	0.42
C28H8.14	WBGene00219838	ncRNA	0.138	0.321	0.12
F38H4.15	WBGene00200459	ncRNA	0.138	0.257	0.12
R160.11	WBGene00220051	ncRNA	0.138	0.193	0.6
F42A9.18	WBGene00249826	ncRNA	0.138	0.193	0.36
F44E5.16	WBGene00219949	ncRNA	0.138	0.193	0.18
mrpr-1	WBGene00045095	ncRNA	0.138	0.193	0.06
Y48C3A.25	WBGene00220170	ncRNA	0.138	0.193	0.06
Y17D7C.9	WBGene00219343	ncRNA	0.138	0.193	0.06
F15E6.12	WBGene00235372	ncRNA	0.138	0.128	0.18
T21C9.16	WBGene00201098	ncRNA	0.138	0.128	0.06
C24F3.7	WBGene00202030	ncRNA	0.138	0.128	0
E03H12.27	WBGene00235378	ncRNA	0.138	0.064	0.36
F40G9.20	WBGene00195034	ncRNA	0.138	0.064	0.3
C04A2.11	WBGene00200874	ncRNA	0.138	0.064	0.3
C07G1.14	WBGene00201991	ncRNA	0.138	0.064	0.24
T22E5.10	WBGene00195820	ncRNA	0.138	0.064	0.12
Y7A9A.79	WBGene00185076	ncRNA	0.138	0.064	0.06
B0001.11	WBGene00197796	ncRNA	0.138	0.064	0.06
T04C12.23	WBGene00199315	ncRNA	0.138	0.064	0.06
tts-2	WBGene00006651	ncRNA	0.138	0.064	0
R144.15	WBGene00195017	ncRNA	0.138	0	0.6
K11D5.2	WBGene00235318	ncRNA	0.138	0	0.06
F16A11.5	WBGene00023472	ncRNA	0.138	0	0
ZK287.11	WBGene00197879	ncRNA	0.138	0	0
Y71F9AL.20	WBGene00200098	ncRNA	0.138	0	0
JC8.17	WBGene00219548	ncRNA	0.069	0.45	0.18
C50F4.18	WBGene00196091	ncRNA	0.069	0.385	0.24
F09E10.16	WBGene00219887	ncRNA	0.069	0.321	0.48
C03H5.10	WBGene00255736	ncRNA	0.069	0.257	0.18
F40F12.11	WBGene00196334	ncRNA	0.069	0.257	0.12
F44E7.13	WBGene00197078	ncRNA	0.069	0.257	0.06
B0285.12	WBGene00045168	ncRNA	0.069	0.193	0.48
Y94H6A.17	WBGene00235348	ncRNA	0.069	0.193	0.06
F55A12.16	WBGene00200300	ncRNA	0.069	0.193	0
B0336.16	WBGene00199402	ncRNA	0.069	0.193	0
K11D9.7	WBGene00199783	ncRNA	0.069	0.128	0.18
F58D5.13	WBGene00219985	ncRNA	0.069	0.128	0.18
C08B11.11	WBGene00199112	ncRNA	0.069	0.128	0.18
T19A5.13	WBGene00196777	ncRNA	0.069	0.128	0.12
F54C9.15	WBGene00195730	ncRNA	0.069	0.128	0.06
T23B12.14	WBGene00220084	ncRNA	0.069	0.128	0
ZK402.6	WBGene00044748	ncRNA	0.069	0.128	0
T04C12.14	WBGene00195159	ncRNA	0.069	0.128	0
Y49F6B.15	WBGene00197552	ncRNA	0.069	0.128	0
T08G5.18	WBGene00198945	ncRNA	0.069	0.128	0
T24B8.21	WBGene00201871	ncRNA	0.069	0.128	0
F14D2.16	WBGene00044751	ncRNA	0.069	0.128	0
F40D4.16	WBGene00194681	ncRNA	0.069	0.064	0.48
B0035.19	WBGene00196590	ncRNA	0.069	0.064	0.12
F46E10.14	WBGene00196996	ncRNA	0.069	0.064	0.12
K07C10.6	WBGene00197803	ncRNA	0.069	0.064	0.12
B0379.9	WBGene00196204	ncRNA	0.069	0.064	0.06
C31H1.97	WBGene00199354	ncRNA	0.069	0.064	0.06
F36H1.17	WBGene00219935	ncRNA	0.069	0.064	0.06
T18H9.10	WBGene00201246	ncRNA	0.069	0.064	0.06
W01H2.8	WBGene00199948	ncRNA	0.069	0.064	0.06
Y55F3BR.19	WBGene00220183	ncRNA	0.069	0.064	0.06
B0348.9	WBGene00235314	ncRNA	0.069	0.064	0.06
F22B3.17	WBGene00200378	ncRNA	0.069	0.064	0.06
Y54G9A.14	WBGene00198455	ncRNA	0.069	0.064	0.06
rncs-1	WBGene00023069	ncRNA	0.069	0.064	0
T21B4.21	WBGene00220076	ncRNA	0.069	0.064	0
Y37E3.25	WBGene00195033	ncRNA	0.069	0.064	0
F33C8.10	WBGene00219931	ncRNA	0.069	0	0.18
F07A11.9	WBGene00195441	ncRNA	0.069	0	0.12
M88.10	WBGene00198216	ncRNA	0.069	0	0.12
C16C2.8	WBGene00200428	ncRNA	0.069	0	0.12
C25G4.16	WBGene00235111	ncRNA	0.069	0	0.12
Y106G6H.17	WBGene00199005	ncRNA	0.069	0	0.06
C54C6.8	WBGene00197670	ncRNA	0.069	0	0.06
K03H4.3	WBGene00197278	ncRNA	0.069	0	0.06
C13C4.12	WBGene00202006	ncRNA	0.069	0	0.06
F28C10.5	WBGene00219922	ncRNA	0.069	0	0.06
R01B10.7	WBGene00196192	ncRNA	0.069	0	0.06
F16A11.8	WBGene00200365	ncRNA	0.069	0	0.06
T23B3.9	WBGene00255606	ncRNA	0.069	0	0.06
B0511.16	WBGene00200290	ncRNA	0.069	0	0.06
B0250.14	WBGene00189978	ncRNA	0.069	0	0
C14F5.9	WBGene00198523	ncRNA	0.069	0	0
F33A8.11	WBGene00201303	ncRNA	0.069	0	0
F13E6.10	WBGene00199935	ncRNA	0.069	0	0
Y54G2A.58	WBGene00195623	ncRNA	0.069	0	0
W10C8.8	WBGene00196235	ncRNA	0.069	0	0
Y106G6E.7	WBGene00200243	ncRNA	0.069	0	0
F35G2.19	WBGene00201133	ncRNA	0.069	0	0
ZC247.8	WBGene00201869	ncRNA	0.069	0	0
Y52D3.2	WBGene00220178	ncRNA	0.069	0	0
F57H12.10	WBGene00195356	ncRNA	0.069	0	0
F15A8.19	WBGene00219893	ncRNA	0.069	0	0
F22E10.6	WBGene00194811	ncRNA	0	0.385	0
W06A7.8	WBGene00198681	ncRNA	0	0.257	0.18
T28D9.13	WBGene00195728	ncRNA	0	0.257	0
F09E8.12	WBGene00235128	ncRNA	0	0.193	0.06
F10C2.9	WBGene00195537	ncRNA	0	0.128	0.12
W09H1.7	WBGene00195754	ncRNA	0	0.128	0.06
F54D12.16	WBGene00198621	ncRNA	0	0.128	0.06
T12D8.11	WBGene00198950	ncRNA	0	0.128	0
F13D12.11	WBGene00195700	ncRNA	0	0.128	0
T14F9.10	WBGene00196676	ncRNA	0	0.128	0
T27E9.11	WBGene00220105	ncRNA	0	0.128	0
T28B11.11	WBGene00197493	ncRNA	0	0.064	0.36
T19C4.16	WBGene00196056	ncRNA	0	0.064	0.3
F39D8.7	WBGene00202343	ncRNA	0	0.064	0.3
Y47D3A.35	WBGene00220163	ncRNA	0	0.064	0.24
Y67D8A.6	WBGene00196015	ncRNA	0	0.064	0.18
R13H4.11	WBGene00199897	ncRNA	0	0.064	0.18
C09D8.11	WBGene00199658	ncRNA	0	0.064	0.12
C15C7.12	WBGene00201126	ncRNA	0	0.064	0.12
Y75B8A.62	WBGene00220207	ncRNA	0	0.064	0.12
F11H8.8	WBGene00201001	ncRNA	0	0.064	0.06
F13B12.13	WBGene00196336	ncRNA	0	0.064	0.06
Y37F4.15	WBGene00220142	ncRNA	0	0.064	0.06
T14G10.10	WBGene00200164	ncRNA	0	0.064	0.06
Y71H9A.9	WBGene00201207	ncRNA	0	0.064	0.06
C55A6.19	WBGene00201538	ncRNA	0	0.064	0.06
F43G9.16	WBGene00198826	ncRNA	0	0.064	0.06
W06A7.9	WBGene00199159	ncRNA	0	0.064	0.06
F39E9.18	WBGene00195025	ncRNA	0	0.064	0.06
C05D2.14	WBGene00197335	ncRNA	0	0.064	0.06
ZK757.7	WBGene00200485	ncRNA	0	0.064	0.06
F10G8.12	WBGene00198497	ncRNA	0	0.064	0
C17H12.34	WBGene00199434	ncRNA	0	0.064	0
F25H10.2	WBGene00196841	ncRNA	0	0.064	0
C10C5.10	WBGene00196524	ncRNA	0	0.064	0
Y47D3A.33	WBGene00195887	ncRNA	0	0	0.18
F52D4.1	WBGene00045391	ncRNA	0	0	0.18
W02H5.17	WBGene00220114	ncRNA	0	0	0.12
linc-171	WBGene00236800	ncRNA	0	0	0.12
Y41E3.461	WBGene00219444	ncRNA	0	0	0.12
T10H9.10	WBGene00198169	ncRNA	0	0	0.12
T28B11.7	WBGene00196176	ncRNA	0	0	0.12
T24C2.9	WBGene00200182	ncRNA	0	0	0.12
F16A11.13	WBGene00219895	ncRNA	0	0	0.12
K02F6.10	WBGene00197405	ncRNA	0	0	0.12
C54G4.11	WBGene00197258	ncRNA	0	0	0.12
Y67D2.10	WBGene00202189	ncRNA	0	0	0.06
C01F6.16	WBGene00235286	ncRNA	0	0	0.06
Y69A2AR.48	WBGene00235299	ncRNA	0	0	0.06
C24A11.13	WBGene00201694	ncRNA	0	0	0.06
Y49G5B.2	WBGene00197436	ncRNA	0	0	0.06
R05D7.8	WBGene00196502	ncRNA	0	0	0.06
R08D7.8	WBGene00199513	ncRNA	0	0	0.06
F46E10.17	WBGene00202247	ncRNA	0	0	0.06
C47E8.12	WBGene00195235	ncRNA	0	0	0
T05E11.10	WBGene00199751	ncRNA	0	0	0
F08B1.8	WBGene00219881	ncRNA	0	0	0
21ur-15095	WBGene00170862	piRNA	0.275	0	0.18
21ur-11676	WBGene00168270	piRNA	0.138	0.385	0.06
21ur-10387	WBGene00166235	piRNA	0.138	0.064	0
21ur-6997	WBGene00172607	piRNA	0.138	0	0.48
21ur-2151	WBGene00048647	piRNA	0.138	0	0.06
21ur-4497	WBGene00047710	piRNA	0.069	0.064	0.12
21ur-4505	WBGene00049988	piRNA	0.069	0.064	0
21ur-6281	WBGene00165666	piRNA	0.069	0	0.12
21ur-5184	WBGene00047232	piRNA	0.069	0	0.06
21ur-9425	WBGene00174900	piRNA	0	0.064	0.36
21ur-13565	WBGene00173751	piRNA	0	0.064	0.12
21ur-9650	WBGene00171568	piRNA	0	0.064	0.12
21ur-5882	WBGene00169335	piRNA	0	0.064	0.12
21ur-9319	WBGene00166603	piRNA	0	0.064	0.06
21ur-7403	WBGene00174710	piRNA	0	0.064	0.06
21ur-13804	WBGene00168182	piRNA	0	0.064	0
21ur-2174	WBGene00047988	piRNA	0	0	0.24
21ur-15630	WBGene00165356	piRNA	0	0	0.12
21ur-4841	WBGene00049922	piRNA	0	0	0.06
eef-2	WBGene00001167	protein_coding	22196.4	21351.5	28798.5
ndk-1	WBGene00009119	protein_coding	20108.3	22413.7	21411.2
rpl-12	WBGene00004424	protein_coding	15284.2	15039.7	15673.8
eef-1G	WBGene00008920	protein_coding	13370	13247.4	16752.4
eef-1A.1	WBGene00001168	protein_coding	13302.8	11121.8	13863.4
clec-87	WBGene00007709	protein_coding	11307.9	13605.2	12072.4
pab-1	WBGene00003902	protein_coding	8863.31	7602.2	12087.8
ant-1.1	WBGene00006439	protein_coding	7553.01	8028.41	8947.92
rpl-7A	WBGene00004419	protein_coding	7524.99	6838.82	9015.05
perm-4	WBGene00016638	protein_coding	7210.57	9413.75	8533.37
H28O16.1	WBGene00010419	protein_coding	7142.6	7169.82	10013.6
R09B3.3	WBGene00011156	protein_coding	7108.1	8212.67	8197
sip-1	WBGene00004798	protein_coding	6035.79	7559.54	6645.07
eef-1B.1	WBGene00018846	protein_coding	5326.1	5688.69	6117.64
cpg-3	WBGene00011063	protein_coding	5236.03	7349.71	6356.44
perm-2	WBGene00016636	protein_coding	4997.08	6674.68	6182.6
daf-21	WBGene00000915	protein_coding	4663.31	4421.75	3988.2
rme-2	WBGene00004374	protein_coding	4243.53	5578.63	5327.62
rmd-1	WBGene00011501	protein_coding	3835.18	5117.99	3506.63
rpl-3	WBGene00004414	protein_coding	3622.88	2900.98	3711.51
cbd-1	WBGene00010351	protein_coding	3493.83	3906.05	3691.15
ctc-1	WBGene00010964	protein_coding	3219.14	4730.26	2577.86
rpl-19	WBGene00004431	protein_coding	3139.47	3183.4	3446.95
hsp-1	WBGene00002005	protein_coding	3101.8	2877.85	2925.22
sec-61	WBGene00013311	protein_coding	3015.66	3809.29	3692.05
T22F3.3	WBGene00020696	protein_coding	2806.8	3403.9	3749.64
rla-0	WBGene00004408	protein_coding	2623.49	2327.19	2583.86
Y62H9A.6	WBGene00013394	protein_coding	2549.6	3447.26	1318.71
rack-1	WBGene00010556	protein_coding	2538.58	2122.95	2574.49
hil-4	WBGene00001855	protein_coding	2523.85	2657.23	2771.86
rpl-10	WBGene00004421	protein_coding	2507.11	2380.97	2388.17
clec-88	WBGene00019606	protein_coding	2422.41	3498.28	2837.13
C44B7.5	WBGene00016627	protein_coding	2319.53	4062.74	1681.08
cpg-1	WBGene00000465	protein_coding	2319.33	2545.7	2104.82
msp-59	WBGene00003452	protein_coding	2310.86	285.575	703.669
rpl-4	WBGene00004415	protein_coding	2310.72	1894.24	2475.18
rps-8	WBGene00004477	protein_coding	2307.9	2162.66	2555.52
rps-3	WBGene00004472	protein_coding	2276.22	2025.36	2364.46
aldo-2	WBGene00017166	protein_coding	2271.19	2754.11	2354.25
Y62H9A.5	WBGene00013393	protein_coding	2136.29	2927.77	1245.46
F23A7.8	WBGene00044638	protein_coding	2122.86	2904.45	2011.03
cpg-2	WBGene00015102	protein_coding	2121.49	2577.11	2079.18
ctc-2	WBGene00010965	protein_coding	2101.11	3111.96	1236.75
ZK813.3	WBGene00022822	protein_coding	2084.51	2885.62	1051.75
msp-152	WBGene00003470	protein_coding	2066.19	259.105	704.449
clec-91	WBGene00014117	protein_coding	2027.84	2549.55	2298.95
msp-31	WBGene00003429	protein_coding	2002.98	235.334	648.247
rps-4	WBGene00004473	protein_coding	1959.59	1729.45	1945.52
Y37E3.8	WBGene00021350	protein_coding	1934.18	1806.22	2223.11
cgh-1	WBGene00000479	protein_coding	1923.3	1730.02	2512.23
D1054.11	WBGene00008378	protein_coding	1916.9	2601.97	1092.16
enpl-1	WBGene00011480	protein_coding	1910.63	2544.67	1926.91
msp-40	WBGene00003435	protein_coding	1907.81	199.42	756.869
rla-1	WBGene00004409	protein_coding	1897.83	1946.66	2123.14
rpl-17	WBGene00004429	protein_coding	1861.67	1460.9	2004.07
rps-0	WBGene00004469	protein_coding	1859.12	1508.95	1801.65
msp-45	WBGene00003438	protein_coding	1845.56	193.638	515.667
rps-1	WBGene00004470	protein_coding	1779.45	1623.63	1985.45
Y37D8A.19	WBGene00012557	protein_coding	1772.84	2219.52	1058.41
D1054.10	WBGene00008377	protein_coding	1765.06	2409.11	1005.94
rps-16	WBGene00004485	protein_coding	1737.93	1652.35	2124.52
rpl-7	WBGene00004418	protein_coding	1724.91	1463.34	1779.5
rpl-5	WBGene00004416	protein_coding	1720.44	1450.55	1715.31
msp-50	WBGene00003443	protein_coding	1620.11	201.541	544.009
rpl-2	WBGene00004413	protein_coding	1597.66	1368.7	1697.96
C39D10.7	WBGene00016534	protein_coding	1587.33	2235.26	1260.77
ubq-1	WBGene00006727	protein_coding	1584.02	1328.81	1706.12
cey-2	WBGene00000473	protein_coding	1582.44	1763.62	1595.28
C04G2.9	WBGene00007308	protein_coding	1548.49	165.177	400.201
rps-5	WBGene00004474	protein_coding	1533.96	1306.32	1600.74
glh-1	WBGene00001598	protein_coding	1533.34	1287.69	2231.46
rps-2	WBGene00004471	protein_coding	1528.18	1434.94	1641.09
rps-17	WBGene00004486	protein_coding	1527.14	1571.85	1673.28
msp-33	WBGene00003431	protein_coding	1526.94	180.147	588.502
tct-1	WBGene00009122	protein_coding	1524.87	1529.77	1759.02
rps-9	WBGene00004478	protein_coding	1505.59	1406.93	1609.09
atp-2	WBGene00000229	protein_coding	1502.49	1359.64	1689.19
Y51F10.2	WBGene00021763	protein_coding	1490.16	1697.45	1520.76
rpl-27	WBGene00004441	protein_coding	1468.54	1395.88	1924.81
hil-5	WBGene00001856	protein_coding	1427.43	1142.36	1531.03
rps-14	WBGene00004483	protein_coding	1416.62	1344.22	1611.43
msp-49	WBGene00003442	protein_coding	1411.66	168.261	457.063
rpl-1	WBGene00004412	protein_coding	1404.85	1190.61	1315.17
rpl-13	WBGene00004425	protein_coding	1403.95	1272.46	1446.19
pdi-2	WBGene00003963	protein_coding	1355.4	1977.95	1268.63
iff-1	WBGene00002064	protein_coding	1347.55	1585.53	1753.14
cyn-7	WBGene00000883	protein_coding	1344.38	1389.39	1291.87
rpl-25.2	WBGene00004439	protein_coding	1340.32	1190.36	1422.05
rpl-9	WBGene00004420	protein_coding	1335.5	1164.79	1371.01
tbb-2	WBGene00006537	protein_coding	1311.4	1268.86	1275.54
T04G9.7	WBGene00020218	protein_coding	1305.96	2012.71	1396.59
R09B3.2	WBGene00011155	protein_coding	1302.79	1585.98	1499.03
msp-51	WBGene00003444	protein_coding	1301.83	180.725	357.869
rps-23	WBGene00004492	protein_coding	1279.38	1152.77	1263.53
rps-11	WBGene00004480	protein_coding	1269.6	1125.4	1369.27
rpl-6	WBGene00004417	protein_coding	1267.74	1043.23	1385.12
puf-5	WBGene00004241	protein_coding	1237.31	1473.04	1239.87
rpl-18	WBGene00004430	protein_coding	1235.03	1106.58	1260.95
act-4	WBGene00000066	protein_coding	1232.55	912.105	923.914
rpl-21	WBGene00004433	protein_coding	1208.11	1094.37	1269.17
rpl-20	WBGene00004432	protein_coding	1202.19	1095.46	1256.98
msp-113	WBGene00003468	protein_coding	1197.98	158.239	310.914
gfat-2	WBGene00009035	protein_coding	1184.9	1188.36	1365.67
ssq-4	WBGene00006053	protein_coding	1177.53	140.956	340.576
rps-18	WBGene00004487	protein_coding	1176.22	1091.03	1232.43
tba-2	WBGene00006529	protein_coding	1169.27	1124.69	1145.24
F23A7.4	WBGene00009069	protein_coding	1167.34	1571.46	975.433
gst-7	WBGene00001755	protein_coding	1155.43	1554.76	1027.79
msp-57	WBGene00003450	protein_coding	1153.36	167.426	287.016
rpl-16	WBGene00004428	protein_coding	1149.85	978.664	1139.18
msp-38	WBGene00003434	protein_coding	1147.1	112.303	456.703
F48E3.4	WBGene00018605	protein_coding	1125.06	1618.23	1001.85
F17E9.5	WBGene00017542	protein_coding	1115.14	84.291	353.185
act-2	WBGene00000064	protein_coding	1114.66	1140.69	1046.29
ddo-3	WBGene00017648	protein_coding	1113.97	1471.3	1092.94
Y69E1A.2	WBGene00013474	protein_coding	1113.97	127.593	294.761
msp-19	WBGene00003426	protein_coding	1112.32	144.04	330.188
rpl-15	WBGene00004427	protein_coding	1107.71	1048.31	1131.31
rpl-31	WBGene00004445	protein_coding	1095.24	1071.37	1242.75
T21C9.13	WBGene00011898	protein_coding	1091.8	1551.23	1552.41
ctb-1	WBGene00000829	protein_coding	1083.4	1682.03	812.11
klp-19	WBGene00002229	protein_coding	1081.95	1100.22	1156.71
rpl-11.1	WBGene00004422	protein_coding	1079.4	963.18	1252.9
Y38C1AA.7	WBGene00021398	protein_coding	1076.86	88.274	357.809
ubq-2	WBGene00006728	protein_coding	1035.68	971.018	1042.38
rps-15	WBGene00004484	protein_coding	1026.59	1019.91	1170.16
rpl-32	WBGene00004446	protein_coding	1000.22	891.931	1018.9
rps-7	WBGene00004476	protein_coding	999.595	847.023	1029.65
rps-25	WBGene00004494	protein_coding	991.056	942.236	1300.34
chs-1	WBGene00000496	protein_coding	980.796	1316.15	1127.23
pqn-59	WBGene00004143	protein_coding	970.053	912.362	1008.22
msp-81	WBGene00003467	protein_coding	968.056	109.219	337.273
rps-6	WBGene00004475	protein_coding	956.556	838.35	1009.18
C04F12.7	WBGene00007301	protein_coding	953.595	89.367	569.408
ZK813.7	WBGene00045394	protein_coding	950.979	1091.48	582.137
R09E10.6	WBGene00011176	protein_coding	934.934	78.573	555.958
B0393.3	WBGene00007168	protein_coding	928.943	1114.87	1040.28
rps-12	WBGene00004481	protein_coding	914.551	834.045	952.436
rps-10	WBGene00004479	protein_coding	911.314	835.009	931.96
W02D9.7	WBGene00012213	protein_coding	911.177	980.077	301.727
nuo-3	WBGene00013308	protein_coding	910.075	1068.61	1161.15
B0513.4	WBGene00007196	protein_coding	909.248	1374.55	845.135
C12D8.1	WBGene00007534	protein_coding	908.904	977.893	1035.36
ssq-1	WBGene00006050	protein_coding	907.733	100.738	274.706
msp-3	WBGene00003424	protein_coding	895.132	96.048	297.043
F46H5.3	WBGene00018519	protein_coding	894.237	802.629	779.686
msp-55	WBGene00003448	protein_coding	893.961	131.898	239.28
rpl-24.1	WBGene00004436	protein_coding	889.623	800.701	963.244
rps-13	WBGene00004482	protein_coding	864.626	772.562	879.361
icd-2	WBGene00022042	protein_coding	859.186	824.73	871.014
tbb-1	WBGene00006536	protein_coding	853.884	818.498	862.128
par-5	WBGene00003920	protein_coding	850.234	811.431	896.413
klp-15	WBGene00002225	protein_coding	840.938	1146.92	999.871
T05F1.2	WBGene00011489	protein_coding	836.737	1005.39	1171.72
ssq-2	WBGene00006051	protein_coding	828.749	102.923	198.989
msp-53	WBGene00003446	protein_coding	826.201	116.222	208.116
sri-40	WBGene00005552	protein_coding	819.04	944.42	846.276
rps-24	WBGene00004493	protein_coding	817.043	760.805	833.426
car-1	WBGene00012484	protein_coding	810.019	740.76	1058.96
K07H8.10	WBGene00019510	protein_coding	806.576	596.206	813.011
wago-1	WBGene00011061	protein_coding	805.818	782.584	958.74
msp-36	WBGene00003432	protein_coding	803.89	104.464	294.041
C05C10.5	WBGene00007332	protein_coding	799.414	1001.09	855.763
gdh-1	WBGene00014095	protein_coding	781.854	620.812	812.11
Y18D10A.11	WBGene00012481	protein_coding	776.965	869.895	832.465
rps-19	WBGene00004488	protein_coding	775.657	677.734	851.92
C01G8.1	WBGene00015312	protein_coding	774.073	918.272	884.164
Y62H9A.3	WBGene00013391	protein_coding	773.66	819.654	234.656
rps-26	WBGene00004495	protein_coding	771.456	665.72	837.329
gln-6	WBGene00001607	protein_coding	761.678	845.224	689.198
tba-1	WBGene00006528	protein_coding	761.678	792.992	727.326
ZC373.2	WBGene00013867	protein_coding	759.13	1015.41	512.545
imb-3	WBGene00002077	protein_coding	756.445	622.29	898.755
rpl-26	WBGene00004440	protein_coding	754.31	661.159	755.367
klp-16	WBGene00002226	protein_coding	750.867	1003.01	918.27
cdc-48.1	WBGene00007352	protein_coding	747.493	720.586	751.645
spsb-2	WBGene00021596	protein_coding	746.597	915.188	779.386
ani-2	WBGene00019608	protein_coding	742.052	858.973	975.433
fib-1	WBGene00001423	protein_coding	740.193	656.276	797.819
rpl-23	WBGene00004435	protein_coding	738.403	646.575	769.058
Y54G11A.3	WBGene00013214	protein_coding	736.75	718.659	785.99
msp-56	WBGene00003449	protein_coding	736.199	83.006	275.907
msp-76	WBGene00003463	protein_coding	735.786	80.244	260.296
F08B4.8	WBGene00255375	protein_coding	724.493	56.216	333.671
gfat-1	WBGene00008546	protein_coding	722.84	692.446	663.198
msp-65	WBGene00003458	protein_coding	722.702	104.786	156.898
ify-1	WBGene00002068	protein_coding	722.083	782.134	686.075
icd-1	WBGene00002045	protein_coding	722.014	705.617	741.977
inf-1	WBGene00002083	protein_coding	716.298	567.68	775.002
cyb-3	WBGene00000868	protein_coding	693.023	728.874	649.628
cpf-1	WBGene00000773	protein_coding	689.718	788.495	759.39
cts-1	WBGene00000833	protein_coding	687.583	555.152	790.194
try-1	WBGene00006619	protein_coding	682.832	1022.74	738.795
egg-1	WBGene00015083	protein_coding	681.867	835.587	733.271
rpl-35	WBGene00004449	protein_coding	681.73	604.558	762.573
cey-3	WBGene00000474	protein_coding	668.371	926.624	726.666
ahcy-1	WBGene00019322	protein_coding	668.026	484.224	734.892
atp-6	WBGene00010960	protein_coding	667.062	1157.01	493.571
nasp-2	WBGene00008218	protein_coding	662.655	748.983	776.683
spn-4	WBGene00004984	protein_coding	662.38	676.899	615.282
far-2	WBGene00001386	protein_coding	648.676	622.868	777.044
T21C9.4	WBGene00011892	protein_coding	647.988	1135.17	843.514
rpl-30	WBGene00004444	protein_coding	647.919	583.742	664.759
F44E7.4	WBGene00018426	protein_coding	647.574	681.717	776.984
R151.2	WBGene00020107	protein_coding	644.269	881.909	779.566
F26B1.8	WBGene00194703	protein_coding	641.721	65.146	362.612
ddx-17	WBGene00010260	protein_coding	641.515	675.421	650.529
vig-1	WBGene00006924	protein_coding	640.55	538.577	692.921
rps-30	WBGene00004499	protein_coding	638.622	585.862	719.941
rps-20	WBGene00004489	protein_coding	637.245	648.245	689.798
K07C5.4	WBGene00010627	protein_coding	632.012	467.006	561.842
let-2	WBGene00002280	protein_coding	628.5	362.413	556.438
rpl-36	WBGene00004450	protein_coding	624.988	613.873	670.163
rpl-22	WBGene00004434	protein_coding	618.721	651.907	645.965
szy-4	WBGene00077732	protein_coding	616.587	686.086	686.736
ima-2	WBGene00002073	protein_coding	615.76	597.94	651.97
acs-13	WBGene00022037	protein_coding	609.287	691.868	661.757
kars-1	WBGene00002238	protein_coding	605.5	526.113	692.14
nap-1	WBGene00017075	protein_coding	605.225	543.267	646.986
nmy-2	WBGene00003777	protein_coding	597.719	545.708	766.956
rpl-14	WBGene00004426	protein_coding	594.207	523.029	643.203
gpi-1	WBGene00013597	protein_coding	584.291	691.097	768.397
prmt-1	WBGene00013766	protein_coding	581.674	522.451	646.386
rpl-33	WBGene00004447	protein_coding	581.123	514.227	601.412
mex-5	WBGene00003230	protein_coding	579.746	596.27	587.061
B0035.3	WBGene00007106	protein_coding	578.506	967.742	612.22
hrp-1	WBGene00001999	protein_coding	577.611	603.337	660.917
prp-8	WBGene00004187	protein_coding	577.267	530.674	668.182
pdi-6	WBGene00015168	protein_coding	572.928	875.227	501.016
spch-1	WBGene00007307	protein_coding	567.144	42.017	252.61
rpl-38	WBGene00004452	protein_coding	566.937	494.953	685.295
hsp-60	WBGene00002025	protein_coding	566.593	476.836	600.691
cpg-4	WBGene00015677	protein_coding	566.042	707.609	679.891
F41C3.5	WBGene00018271	protein_coding	562.117	607.384	486.606
ubl-1	WBGene00006725	protein_coding	561.429	559.585	626.631
eel-1	WBGene00022069	protein_coding	560.878	449.017	671.965
F54C8.4	WBGene00010037	protein_coding	559.638	680.818	653.051
Y69H2.3	WBGene00013481	protein_coding	557.021	1185.99	504.139
pafo-1	WBGene00008338	protein_coding	551.444	607.706	741.077
F49E8.2	WBGene00018636	protein_coding	550.273	736.969	741.737
msd-4	WBGene00016447	protein_coding	548.965	54.738	164.223
C47G2.4	WBGene00008165	protein_coding	541.183	752.838	601.832
puf-3	WBGene00004239	protein_coding	539.324	566.267	534.642
skpt-1	WBGene00018613	protein_coding	539.049	581.493	635.577
nop-1	WBGene00017774	protein_coding	534.986	612.588	682.953
cids-2	WBGene00009451	protein_coding	534.848	693.796	662.538
F01G4.6	WBGene00008505	protein_coding	534.435	515.512	558.78
ZC434.8	WBGene00013894	protein_coding	533.058	256.921	321.181
cyc-2.1	WBGene00017121	protein_coding	531.611	514.356	650.649
cct-4	WBGene00000379	protein_coding	526.722	501.057	506.721
msp-64	WBGene00003457	protein_coding	526.24	54.224	120.931
cct-5	WBGene00000380	protein_coding	525.138	508.702	513.025
dut-1	WBGene00010609	protein_coding	523.899	665.72	536.443
rnr-1	WBGene00004391	protein_coding	521.076	491.163	565.325
enol-1	WBGene00011884	protein_coding	519.561	496.11	577.214
nos-2	WBGene00003784	protein_coding	519.01	557.015	539.986
EEED8.3	WBGene00017134	protein_coding	518.183	879.724	574.271
C33F10.1	WBGene00016351	protein_coding	513.776	41.76	277.168
rpl-41	WBGene00004454	protein_coding	509.645	454.285	591.204
Y55F3AM.3	WBGene00021921	protein_coding	507.992	513.585	542.748
pat-10	WBGene00003934	protein_coding	507.579	371.922	252.73
D2030.7	WBGene00008417	protein_coding	501.037	606.164	675.267
pos-1	WBGene00004078	protein_coding	499.315	500.414	447.336
rpl-43	WBGene00004456	protein_coding	499.109	433.405	557.759
vgln-1	WBGene00007463	protein_coding	499.04	443.171	559.26
ruvb-1	WBGene00007784	protein_coding	498.833	523.543	640.861
npp-9	WBGene00003795	protein_coding	498.214	460.453	570.669
rpn-2	WBGene00004459	protein_coding	497.043	404.302	539.986
fum-1	WBGene00001503	protein_coding	496.699	498.23	585.14
pfd-6	WBGene00009004	protein_coding	493.187	864.305	463.668
W08E12.7	WBGene00021088	protein_coding	492.98	417.344	520.231
oma-2	WBGene00003865	protein_coding	491.121	488.85	453.04
uba-1	WBGene00006699	protein_coding	486.094	460.003	518.189
dli-1	WBGene00001007	protein_coding	485.543	511.786	589.103
rpl-29	WBGene00004443	protein_coding	484.923	398.327	474.356
F30F8.1	WBGene00009270	protein_coding	484.717	572.242	584.419
F18A1.7	WBGene00017548	protein_coding	480.86	592.351	515.547
wapl-1	WBGene00019953	protein_coding	479.346	569.736	591.684
ztf-7	WBGene00009772	protein_coding	479.346	423.062	528.817
vdac-1	WBGene00019900	protein_coding	478.932	444.584	473.876
ent-6	WBGene00009499	protein_coding	478.037	675.1	563.583
hda-6	WBGene00018319	protein_coding	476.798	517.247	558.179
C37C3.9	WBGene00016501	protein_coding	476.453	564.596	596.968
ran-1	WBGene00004302	protein_coding	476.316	489.043	497.714
spd-2	WBGene00004953	protein_coding	475.765	543.138	558.359
mom-2	WBGene00003395	protein_coding	472.941	583.678	484.924
tofu-1	WBGene00007785	protein_coding	468.121	470.733	608.317
gna-2	WBGene00001647	protein_coding	467.846	681.203	539.745
rpn-7	WBGene00004463	protein_coding	466.882	450.431	444.814
hsp-110	WBGene00016250	protein_coding	466.4	408.414	473.276
chc-1	WBGene00011867	protein_coding	465.573	435.654	499.455
F49C12.9	WBGene00009878	protein_coding	465.16	480.948	460.366
sss-1	WBGene00006056	protein_coding	464.403	40.732	247.626
rpl-34	WBGene00004448	protein_coding	464.334	409.377	476.338
tbh-1	WBGene00006541	protein_coding	462.199	704.91	274.346
egl-45	WBGene00001209	protein_coding	460.959	403.595	532.48
fln-1	WBGene00022048	protein_coding	459.995	398.198	553.616
glh-2	WBGene00001599	protein_coding	459.651	460.196	586.641
F32D1.5	WBGene00017984	protein_coding	456.415	489.235	498.915
ctc-3	WBGene00010962	protein_coding	453.316	615.608	288.096
rps-27	WBGene00004496	protein_coding	452.627	382.522	474.717
puf-11	WBGene00022257	protein_coding	450.355	488.85	443.913
mcm-7	WBGene00003159	protein_coding	448.702	461.16	458.925
spch-3	WBGene00020840	protein_coding	448.427	34.308	240.18
rps-22	WBGene00004491	protein_coding	446.774	431.542	474.116
F41H10.1	WBGene00018314	protein_coding	444.984	42.66	230.393
rpn-1	WBGene00004458	protein_coding	444.364	409.442	507.321
pbs-7	WBGene00003953	protein_coding	443.124	535.364	383.688
rnr-2	WBGene00004392	protein_coding	442.436	480.626	441.872
skpo-1	WBGene00009897	protein_coding	441.403	666.362	310.373
xbp-1	WBGene00006959	protein_coding	441.058	539.412	440.491
F27C1.1	WBGene00017851	protein_coding	440.783	39.961	237.418
eat-6	WBGene00001137	protein_coding	437.891	430.322	428.782
K01G5.5	WBGene00010478	protein_coding	429.283	341.79	427.161
C28H8.3	WBGene00016194	protein_coding	428.388	362.156	549.173
ssp-10	WBGene00006039	protein_coding	428.181	48.442	177.313
C15C6.2	WBGene00007601	protein_coding	427.699	32.187	182.537
nol-5	WBGene00020915	protein_coding	427.562	317.441	395.817
W05F2.3	WBGene00021035	protein_coding	424.532	493.99	410.949
col-140	WBGene00000713	protein_coding	423.705	30.388	84.664
acly-2	WBGene00007150	protein_coding	423.568	408.285	481.382
fbxc-50	WBGene00015912	protein_coding	423.086	483.068	417.013
crt-1	WBGene00000802	protein_coding	422.948	552.711	487.867
knl-2	WBGene00019432	protein_coding	420.744	445.355	516.388
top-2	WBGene00010785	protein_coding	419.711	392.352	438.269
rpl-28	WBGene00004442	protein_coding	417.783	402.182	440.071
prdx-2	WBGene00006434	protein_coding	416.957	523.158	428.782
tre-1	WBGene00006607	protein_coding	415.924	528.426	496.033
gpd-1	WBGene00001683	protein_coding	415.511	440.73	425.9
W09C5.7	WBGene00012353	protein_coding	415.304	494.311	472.675
dhc-1	WBGene00000962	protein_coding	414.684	357.98	581.357
hel-1	WBGene00001840	protein_coding	414.616	401.732	476.878
sygl-1	WBGene00012104	protein_coding	411.379	428.073	395.697
Y62H9A.4	WBGene00013392	protein_coding	410.828	493.861	129.637
npp-10	WBGene00003796	protein_coding	410.691	349.436	427.521
F54D5.9	WBGene00010053	protein_coding	406.559	392.352	484.744
R53.4	WBGene00011273	protein_coding	403.46	417.087	438.63
col-124	WBGene00000698	protein_coding	401.119	17.603	64.008
K08F4.3	WBGene00010678	protein_coding	396.849	532.28	528.817
F58A6.9	WBGene00019026	protein_coding	396.367	23.514	170.948
eif-3.C	WBGene00001226	protein_coding	394.301	384.064	466.671
F08H9.2	WBGene00008590	protein_coding	391.822	27.433	154.616
Y82E9BR.3	WBGene00022336	protein_coding	390.17	385.221	403.743
nspd-2	WBGene00010633	protein_coding	389.688	44.137	185.84
F55B11.3	WBGene00010085	protein_coding	387.828	436.939	113.906
C37A2.7	WBGene00016493	protein_coding	387.828	397.685	470.634
pgl-1	WBGene00003992	protein_coding	387.346	317.826	442.773
D1081.7	WBGene00008385	protein_coding	387.278	413.104	408.787
nspd-10	WBGene00020860	protein_coding	386.451	42.788	170.288
sas-5	WBGene00009385	protein_coding	384.867	441.436	433.946
F17E9.4	WBGene00017541	protein_coding	382.388	452.165	162.722
W01D2.1	WBGene00012179	protein_coding	381.424	317.377	417.374
eef-1B.2	WBGene00012768	protein_coding	380.873	396.978	457.724
cdc-48.2	WBGene00008053	protein_coding	380.805	350.913	395.037
mcm-6	WBGene00003158	protein_coding	379.909	396.849	429.022
prg-1	WBGene00004178	protein_coding	379.841	327.271	464.989
F19F10.9	WBGene00017605	protein_coding	379.703	374.492	394.076
sdz-27	WBGene00011124	protein_coding	377.706	490.842	312.715
ZC308.4	WBGene00022586	protein_coding	377.637	478.506	502.878
cct-2	WBGene00000378	protein_coding	374.951	350.913	383.568
trcs-1	WBGene00009186	protein_coding	373.23	412.397	342.137
ZK938.1	WBGene00014158	protein_coding	373.023	29.553	224.509
rps-29	WBGene00004498	protein_coding	372.748	316.349	401.822
nduo-4	WBGene00010963	protein_coding	370.269	628.714	282.752
pas-3	WBGene00003924	protein_coding	369.924	404.623	385.129
C18E9.2	WBGene00007683	protein_coding	367.445	485.316	535.963
cyb-1	WBGene00000865	protein_coding	367.17	236.876	275.547
C14C10.5	WBGene00007588	protein_coding	366.344	325.215	414.371
F55B11.2	WBGene00010084	protein_coding	365.448	479.085	110.183
tkt-1	WBGene00008506	protein_coding	364.76	338.706	424.699
cra-1	WBGene00020068	protein_coding	363.176	323.48	524.314
pdi-3	WBGene00003964	protein_coding	362.625	424.411	383.688
F55A3.3	WBGene00018849	protein_coding	361.386	344.296	409.087
pqn-51	WBGene00004136	protein_coding	359.595	401.732	381.286
daf-18	WBGene00000913	protein_coding	359.389	381.816	384.049
rpt-2	WBGene00004502	protein_coding	358.149	378.475	348.802
lst-3	WBGene00003085	protein_coding	356.978	300.737	340.276
nduo-5	WBGene00010967	protein_coding	356.565	664.885	327.426
tads-1	WBGene00007217	protein_coding	356.152	555.281	417.374
gtbp-1	WBGene00010677	protein_coding	356.014	308.254	397.799
pam-1	WBGene00003914	protein_coding	355.326	318.533	383.328
rsa-1	WBGene00007710	protein_coding	353.949	381.173	470.453
fasn-1	WBGene00009342	protein_coding	353.673	274.589	333.791
pdha-1	WBGene00011510	protein_coding	353.604	331.382	393.235
gsp-3	WBGene00021113	protein_coding	353.398	17.411	135.702
rpt-1	WBGene00004501	protein_coding	352.02	348.536	316.137
M28.5	WBGene00010896	protein_coding	351.47	280.628	339.795
nspd-5	WBGene00017386	protein_coding	350.299	41.503	175.572
ZK973.11	WBGene00022836	protein_coding	350.23	404.495	378.524
rpn-5	WBGene00004461	protein_coding	349.748	357.466	365.915
wht-2	WBGene00007513	protein_coding	346.305	440.794	437.369
plk-1	WBGene00004042	protein_coding	345.892	336.265	393.896
mdt-22	WBGene00007022	protein_coding	345.134	625.63	410.709
ifet-1	WBGene00004132	protein_coding	339.832	330.483	371.979
mix-1	WBGene00003367	protein_coding	339.419	356.181	491.349
let-70	WBGene00002344	protein_coding	339.419	344.681	342.557
patr-1	WBGene00009661	protein_coding	338.592	332.218	314.036
snrp-200	WBGene00012896	protein_coding	337.215	303.692	452.02
ubc-6	WBGene00006703	protein_coding	337.077	335.815	338.474
acs-19	WBGene00007969	protein_coding	336.733	294.184	350.483
cct-1	WBGene00000377	protein_coding	334.943	313.265	320.1
ZK484.5	WBGene00022751	protein_coding	334.805	27.305	133.54
pfn-1	WBGene00003989	protein_coding	334.598	342.561	361.652
swsn-4	WBGene00004204	protein_coding	332.464	299.773	360.211
rsa-2	WBGene00012972	protein_coding	332.326	349.243	395.457
ZK813.1	WBGene00022820	protein_coding	331.224	392.866	143.148
dlc-1	WBGene00001005	protein_coding	330.673	371.408	362.432
eftu-2	WBGene00001166	protein_coding	330.26	285.703	352.345
ssq-3	WBGene00006052	protein_coding	329.365	40.025	115.227
mex-3	WBGene00003229	protein_coding	328.332	343.139	309.232
T08G11.1	WBGene00011629	protein_coding	327.712	292.128	392.155
nduo-1	WBGene00010959	protein_coding	327.437	504.847	254.771
idh-1	WBGene00010317	protein_coding	327.024	393.765	348.982
polk-1	WBGene00017696	protein_coding	326.473	397.62	387.771
W09C3.7	WBGene00021114	protein_coding	324.958	176.228	219.045
spd-5	WBGene00004955	protein_coding	324.269	315.963	419.355
ubr-5	WBGene00009460	protein_coding	323.374	304.399	352.044
mrp-4	WBGene00003410	protein_coding	322.892	357.852	411.549
let-504	WBGene00002696	protein_coding	322.41	309.86	297.043
mcm-2	WBGene00003154	protein_coding	322.135	302.215	330.909
ncbp-1	WBGene00018156	protein_coding	321.79	376.419	426.5
egg-6	WBGene00010621	protein_coding	321.79	369.288	332.17
C10G11.8	WBGene00015688	protein_coding	321.308	31.095	202.592
clik-1	WBGene00020808	protein_coding	320.62	238.482	169.147
nduo-6	WBGene00010957	protein_coding	320.482	543.267	187.701
ptr-2	WBGene00004217	protein_coding	320.275	345.709	306.23
hcp-1	WBGene00001829	protein_coding	319.518	267.329	366.936
gipc-2	WBGene00009681	protein_coding	319.449	32.894	182.837
nbet-1	WBGene00043064	protein_coding	318.829	558.107	311.454
nars-1	WBGene00003815	protein_coding	318.141	299.066	400.621
otub-3	WBGene00009007	protein_coding	317.521	433.791	324.604
acs-4	WBGene00018152	protein_coding	317.521	322.259	364.174
npp-21	WBGene00019940	protein_coding	316.35	264.245	383.268
dvc-1	WBGene00011834	protein_coding	315.73	330.29	323.763
pqn-87	WBGene00004167	protein_coding	315.317	290.586	337.333
mcm-3	WBGene00003155	protein_coding	315.248	352.841	357.268
gst-1	WBGene00001749	protein_coding	315.179	341.276	297.944
F08F3.6	WBGene00017263	protein_coding	315.042	416.637	324.664
pyk-1	WBGene00009126	protein_coding	314.904	280.371	369.337
egg-2	WBGene00019811	protein_coding	313.114	386.184	367.296
ears-1	WBGene00001337	protein_coding	313.045	261.675	387.891
Y57E12AL.1	WBGene00021956	protein_coding	312.7	362.478	348.081
W04A4.2	WBGene00012231	protein_coding	312.15	228.267	80.52
tars-1	WBGene00006617	protein_coding	312.081	261.996	369.578
F10B5.8	WBGene00008642	protein_coding	311.599	343.91	373.841
plk-3	WBGene00004044	protein_coding	311.53	302.536	318.9
ani-1	WBGene00013038	protein_coding	308.5	313.072	354.026
B0041.8	WBGene00015011	protein_coding	307.811	401.154	362.072
hsp-4	WBGene00002008	protein_coding	306.296	345.902	334.631
pfd-3	WBGene00006889	protein_coding	305.814	311.916	314.877
rme-1	WBGene00004373	protein_coding	305.677	304.784	316.438
trm-1	WBGene00006613	protein_coding	305.539	329.455	355.827
oma-1	WBGene00003864	protein_coding	305.263	330.29	341.296
F32A11.3	WBGene00009308	protein_coding	304.85	19.531	104.058
nduf-2.2	WBGene00006463	protein_coding	303.817	337.678	360.931
ekl-6	WBGene00011806	protein_coding	303.611	381.109	398.279
ost-1	WBGene00003893	protein_coding	303.129	154.063	233.936
Y110A2AR.1	WBGene00022452	protein_coding	302.647	396.078	340.336
cct-6	WBGene00000381	protein_coding	302.647	285.446	312.595
Y69A2AR.18	WBGene00022089	protein_coding	301.269	287.566	345.68
dars-1	WBGene00001094	protein_coding	301.063	259.041	377.504
C32F10.8	WBGene00016333	protein_coding	300.787	300.287	369.037
swsn-9	WBGene00007256	protein_coding	299.617	335.88	378.224
snpc-1.1	WBGene00015513	protein_coding	299.479	387.598	389.573
hsr-9	WBGene00002027	protein_coding	299.479	297.075	316.738
pas-2	WBGene00003923	protein_coding	298.997	329.455	258.614
F54D5.2	WBGene00010048	protein_coding	298.515	304.013	403.203
Y39G10AR.9	WBGene00021467	protein_coding	298.446	345.452	233.515
cct-7	WBGene00020391	protein_coding	298.446	285.96	301.366
rpn-3	WBGene00004460	protein_coding	296.931	293.863	287.376
B0495.9	WBGene00015208	protein_coding	296.793	383.55	326.165
fkb-6	WBGene00001431	protein_coding	295.898	262.51	288.757
mcm-4	WBGene00003156	protein_coding	295.692	306.84	328.567
K08E3.5	WBGene00010665	protein_coding	292.662	326.307	308.572
syp-4	WBGene00019247	protein_coding	292.524	332.86	345.259
nuo-4	WBGene00019401	protein_coding	292.524	284.097	355.227
ife-1	WBGene00002059	protein_coding	292.18	258.656	323.043
abcf-2	WBGene00012097	protein_coding	291.285	257.435	327.186
rla-2	WBGene00004410	protein_coding	291.147	292.064	301.306
cey-4	WBGene00000475	protein_coding	289.838	275.681	325.144
dnj-5	WBGene00001023	protein_coding	289.012	270.027	259.095
T22D1.5	WBGene00020684	protein_coding	288.53	314.293	278.249
ret-1	WBGene00004336	protein_coding	287.841	324.444	286.295
F33H2.2	WBGene00009366	protein_coding	287.222	331.961	328.327
abhd-12	WBGene00022393	protein_coding	286.946	333.117	435.387
F26B1.2	WBGene00017816	protein_coding	286.877	280.692	334.391
rpt-3	WBGene00004503	protein_coding	286.602	253.58	257.173
hcp-2	WBGene00001830	protein_coding	284.674	256.15	300.706
R74.8	WBGene00011282	protein_coding	284.605	302.6	316.077
ribo-1	WBGene00020683	protein_coding	281.988	296.432	267.801
E04D5.1	WBGene00008480	protein_coding	281.644	247.605	318.479
paa-1	WBGene00003901	protein_coding	281.644	245.035	285.755
ogdh-1	WBGene00020679	protein_coding	281.368	229.231	338.775
nspd-1	WBGene00022754	protein_coding	280.68	33.344	139.125
rpt-5	WBGene00004505	protein_coding	280.129	244.65	265.64
mex-6	WBGene00003231	protein_coding	279.371	296.561	313.375
cec-3	WBGene00011636	protein_coding	279.234	314.357	322.262
stt-3	WBGene00020437	protein_coding	278.339	279.664	272.365
fem-1	WBGene00001411	protein_coding	277.374	289.43	319.02
nkcc-1	WBGene00012543	protein_coding	277.306	307.29	300.466
emb-5	WBGene00001259	protein_coding	276.41	263.795	299.145
rfc-1	WBGene00004337	protein_coding	275.446	285.382	328.867
T13F2.6	WBGene00011746	protein_coding	275.102	307.675	332.77
Y4C6A.3	WBGene00021153	protein_coding	274.069	336.586	410.769
cdk-8	WBGene00000409	protein_coding	273.381	361.128	345.319
tsn-1	WBGene00006626	protein_coding	273.243	278.508	316.137
spt-5	WBGene00005015	protein_coding	272.761	241.695	272.425
lbp-9	WBGene00021486	protein_coding	272.692	268.806	268.522
math-33	WBGene00010406	protein_coding	272.623	244.457	345.44
ZC477.3	WBGene00022618	protein_coding	272.21	367.81	356.548
rpl-39	WBGene00004453	protein_coding	271.659	248.89	302.928
pbs-5	WBGene00003951	protein_coding	270.901	263.667	295.182
Y105E8A.3	WBGene00013668	protein_coding	270.695	331.768	313.616
Y57G11A.2	WBGene00013290	protein_coding	270.419	13.363	92.71
lab-1	WBGene00007278	protein_coding	270.351	423.383	365.074
H14A12.3	WBGene00019196	protein_coding	269.593	263.217	273.265
sna-1	WBGene00020951	protein_coding	269.18	275.874	298.604
tdc-1	WBGene00006562	protein_coding	267.734	314.164	265.279
atp-3	WBGene00000230	protein_coding	267.114	248.697	320.641
F59C6.5	WBGene00010326	protein_coding	266.908	288.659	366.155
pars-1	WBGene00004189	protein_coding	266.494	266.301	346.46
rps-28	WBGene00004497	protein_coding	266.425	219.915	284.674
dpf-5	WBGene00001058	protein_coding	266.357	308.189	326.465
cyb-2.2	WBGene00000867	protein_coding	265.943	317.891	272.124
fkb-2	WBGene00001427	protein_coding	264.842	284.033	294.101
rpt-4	WBGene00004504	protein_coding	264.704	253.966	284.193
K06A5.2	WBGene00019430	protein_coding	264.36	24.735	115.827
C30F12.4	WBGene00016263	protein_coding	264.291	310.888	292.84
unc-69	WBGene00006802	protein_coding	263.946	267.072	247.086
hxk-1	WBGene00008780	protein_coding	263.533	282.234	250.088
ufd-3	WBGene00007333	protein_coding	262.156	271.955	261.316
iars-1	WBGene00002152	protein_coding	261.192	212.784	321.361
pas-5	WBGene00003926	protein_coding	260.641	292.963	303.888
aars-2	WBGene00000197	protein_coding	260.228	236.105	343.818
lea-1	WBGene00002263	protein_coding	260.228	192.418	387.711
ucr-1	WBGene00018963	protein_coding	259.952	226.532	274.887
smn-1	WBGene00004887	protein_coding	259.815	277.737	291.699
rps-21	WBGene00004490	protein_coding	259.47	238.932	309.773
C07H6.4	WBGene00015581	protein_coding	259.195	260.454	351.984
gpd-4	WBGene00001686	protein_coding	259.126	302.407	264.198
gdi-1	WBGene00001558	protein_coding	258.92	253.452	331.869
T27E7.1	WBGene00012087	protein_coding	258.644	20.173	100.455
pdi-1	WBGene00003962	protein_coding	257.956	296.754	286.415
ruvb-2	WBGene00020687	protein_coding	257.611	249.404	298.004
K01D12.6	WBGene00010465	protein_coding	257.405	310.374	340.756
rpc-2	WBGene00017300	protein_coding	257.405	233.599	276.328
gld-2	WBGene00001596	protein_coding	257.198	274.203	344.779
ama-1	WBGene00000123	protein_coding	257.129	225.119	332.049
F07A5.2	WBGene00008541	protein_coding	257.129	17.668	158.279
vha-2	WBGene00006911	protein_coding	256.854	285.254	264.619
csr-1	WBGene00017641	protein_coding	256.716	243.879	294.701
msp-78	WBGene00003465	protein_coding	256.716	27.626	103.278
plin-1	WBGene00007024	protein_coding	256.578	266.815	274.887
mcm-5	WBGene00003157	protein_coding	256.234	284.804	275.487
C39E9.11	WBGene00008034	protein_coding	256.165	287.952	269.062
tpp-2	WBGene00017686	protein_coding	256.096	254.865	330.308
F53B6.4	WBGene00009959	protein_coding	256.096	36.428	107.481
lin-53	WBGene00003036	protein_coding	255.821	260.133	261.857
F21H7.5	WBGene00009031	protein_coding	255.683	25.313	101.416
gln-5	WBGene00001606	protein_coding	255.201	251.974	238.559
B0336.5	WBGene00015145	protein_coding	254.788	299.131	266.06
asb-1	WBGene00000206	protein_coding	254.788	245.164	316.137
T07C4.3	WBGene00011560	protein_coding	254.65	230.644	284.133
hmg-3	WBGene00001973	protein_coding	254.099	282.748	298.004
sca-1	WBGene00004736	protein_coding	253.273	269.449	281.912
gars-1	WBGene00001744	protein_coding	253.066	231.993	296.383
atp-5	WBGene00007385	protein_coding	252.86	236.298	271.044
lin-13	WBGene00003002	protein_coding	252.584	222.678	266.961
npp-16	WBGene00003802	protein_coding	251.965	301.701	326.465
sqv-4	WBGene00005022	protein_coding	251.62	278.186	272.365
rpn-8	WBGene00004464	protein_coding	251.069	247.926	250.028
rpn-9	WBGene00004465	protein_coding	250.45	310.181	267.741
lec-1	WBGene00002264	protein_coding	249.968	210.856	171.249
rsp-3	WBGene00004700	protein_coding	249.417	252.681	217.003
F52A8.6	WBGene00009919	protein_coding	248.935	300.159	304.609
clu-1	WBGene00000550	protein_coding	248.453	224.477	284.554
nurf-1	WBGene00009180	protein_coding	247.695	260.326	236.338
F55G1.6	WBGene00018902	protein_coding	247.282	311.273	379.005
prdx-3	WBGene00011110	protein_coding	247.282	244.714	297.223
rpa-1	WBGene00017546	protein_coding	247.282	235.141	280.951
tag-349	WBGene00013538	protein_coding	247.075	288.787	245.044
npp-12	WBGene00003798	protein_coding	246.8	237.968	278.609
F55F10.1	WBGene00018898	protein_coding	246.524	177.384	246.425
apc-10	WBGene00000144	protein_coding	246.387	311.016	310.313
hrde-1	WBGene00007624	protein_coding	246.318	264.245	251.649
orc-1	WBGene00012650	protein_coding	245.836	274.332	215.982
ostb-1	WBGene00011638	protein_coding	245.767	262.896	240.24
let-418	WBGene00002637	protein_coding	245.56	227.689	298.664
nspd-7	WBGene00012781	protein_coding	245.423	30.26	104.118
zyg-9	WBGene00006994	protein_coding	244.872	223.063	287.436
K08D12.3	WBGene00019537	protein_coding	244.734	244.843	335.952
pptr-2	WBGene00007554	protein_coding	244.183	264.309	262.097
ZK265.3	WBGene00013956	protein_coding	244.114	24.478	93.25
F32D8.14	WBGene00009336	protein_coding	244.045	300.48	285.875
C39H7.1	WBGene00016541	protein_coding	243.839	24.221	85.985
R11A8.7	WBGene00011240	protein_coding	242.944	214.454	291.639
immt-2	WBGene00012315	protein_coding	242.531	245.742	324.964
C56A3.4	WBGene00008343	protein_coding	242.324	373.656	408.007
D2005.4	WBGene00008399	protein_coding	242.324	258.206	367.116
isw-1	WBGene00002169	protein_coding	242.324	255.764	294.401
gipc-1	WBGene00016440	protein_coding	242.324	23.643	142.367
C34D4.3	WBGene00016399	protein_coding	242.186	32.123	126.815
pod-1	WBGene00004075	protein_coding	241.704	226.147	303.528
smc-6	WBGene00010056	protein_coding	241.704	192.418	224.148
pcn-1	WBGene00003955	protein_coding	241.291	235.463	235.617
wago-4	WBGene00010263	protein_coding	241.084	234.884	284.674
gut-2	WBGene00001808	protein_coding	240.534	352.841	313.015
swd-2.2	WBGene00016374	protein_coding	240.258	319.625	341.056
nuo-5	WBGene00021562	protein_coding	240.258	227.882	311.694
smz-1	WBGene00007733	protein_coding	240.189	17.86	99.615
eif-3.D	WBGene00001227	protein_coding	240.051	205.01	266.12
tag-153	WBGene00006499	protein_coding	239.983	246.256	281.491
T19H12.2	WBGene00020588	protein_coding	239.501	273.496	279.93
rars-1	WBGene00004679	protein_coding	239.225	213.362	297.223
ttr-15	WBGene00011561	protein_coding	238.812	222.678	77.698
unc-132	WBGene00021078	protein_coding	238.468	168.197	171.489
col-139	WBGene00000712	protein_coding	238.33	2.57	8.166
Y55F3BR.1	WBGene00021938	protein_coding	237.504	257.114	224.509
copa-1	WBGene00022119	protein_coding	237.366	219.915	286.956
pod-2	WBGene00004076	protein_coding	237.228	259.234	276.388
ZC395.10	WBGene00022599	protein_coding	236.953	280.242	236.698
Y48G1C.8	WBGene00021681	protein_coding	236.402	233.535	260.115
mecr-1	WBGene00012375	protein_coding	236.264	242.915	298.784
C18E3.9	WBGene00015976	protein_coding	236.195	258.784	254.171
col-184	WBGene00000757	protein_coding	236.058	14.777	32.965
let-716	WBGene00002850	protein_coding	235.851	175.328	245.885
pbs-3	WBGene00003949	protein_coding	235.3	257.435	232.495
nra-2	WBGene00011488	protein_coding	234.749	255.893	269.603
dao-5	WBGene00000931	protein_coding	234.749	178.797	243.783
zyg-11	WBGene00006996	protein_coding	234.474	255.893	252.37
F22D6.2	WBGene00009050	protein_coding	234.267	190.362	177.193
ergo-1	WBGene00019971	protein_coding	234.129	226.982	252.79
tbc-3	WBGene00009322	protein_coding	233.923	287.631	231.534
cif-1	WBGene00019543	protein_coding	232.614	206.038	269.723
hil-2	WBGene00001853	protein_coding	232.614	164.278	278.369
mel-32	WBGene00003214	protein_coding	232.546	231.351	259.215
kin-10	WBGene00002196	protein_coding	232.477	218.951	250.568
vha-13	WBGene00013025	protein_coding	232.408	233.535	224.268
hmg-12	WBGene00001977	protein_coding	232.339	246.834	244.384
col-129	WBGene00000703	protein_coding	232.339	8.352	18.074
smu-2	WBGene00004896	protein_coding	231.306	242.208	241.141
sdha-2	WBGene00016392	protein_coding	231.237	254.929	261.076
lin-41	WBGene00003026	protein_coding	231.237	251.781	280.771
F01F1.11	WBGene00017165	protein_coding	230.617	313.65	257.954
fntb-1	WBGene00006465	protein_coding	230.617	293.477	237.058
toca-2	WBGene00010663	protein_coding	230.617	235.912	314.216
inx-8	WBGene00002130	protein_coding	230.549	294.633	172.45
rmd-2	WBGene00007786	protein_coding	230.342	261.418	228.712
plp-1	WBGene00004046	protein_coding	230.067	232.058	263.298
msp-142	WBGene00003469	protein_coding	229.791	26.662	63.167
toe-1	WBGene00022739	protein_coding	229.516	208.929	212.92
ddb-1	WBGene00010890	protein_coding	229.103	257.628	275.907
npp-3	WBGene00003789	protein_coding	228.965	212.334	281.311
ssp-16	WBGene00006044	protein_coding	228.896	22.679	100.636
natc-1	WBGene00020719	protein_coding	228.758	246.77	241.622
usp-14	WBGene00006856	protein_coding	228.758	223.706	205.174
nfyc-1	WBGene00017742	protein_coding	228.689	284.354	309.292
pgl-3	WBGene00003994	protein_coding	227.932	228.46	256.333
acdh-13	WBGene00001566	protein_coding	227.863	281.656	272.485
ola-1	WBGene00012344	protein_coding	227.794	203.083	283.053
lars-1	WBGene00003073	protein_coding	227.588	198.328	282.272
cars-1	WBGene00000800	protein_coding	227.519	239.639	264.198
lev-11	WBGene00002978	protein_coding	227.243	170.317	164.584
F25B5.6	WBGene00017777	protein_coding	227.174	265.401	272.605
M01A10.1	WBGene00019692	protein_coding	226.899	271.376	270.984
Y59E9AL.6	WBGene00021996	protein_coding	226.141	24.414	74.816
him-1	WBGene00001860	protein_coding	225.797	214.904	250.508
lpd-7	WBGene00003063	protein_coding	225.728	165.755	224.569
mex-1	WBGene00003228	protein_coding	224.971	219.915	248.106
msp-10	WBGene00003425	protein_coding	224.833	27.433	107.601
his-68	WBGene00001942	protein_coding	224.627	293.734	234.656
lap-2	WBGene00002250	protein_coding	224.627	205.588	241.982
mel-28	WBGene00003210	protein_coding	224.42	204.689	235.437
B0261.6	WBGene00015094	protein_coding	224.282	16.062	88.747
Y49E10.4	WBGene00013030	protein_coding	224.213	313.522	257.714
ddx-15	WBGene00018967	protein_coding	223.938	191.904	223.428
pbs-4	WBGene00003950	protein_coding	223.318	272.79	229.552
K04F10.7	WBGene00019399	protein_coding	222.905	254.544	249.127
C04E6.11	WBGene00015425	protein_coding	222.836	252.167	278.849
C27F2.9	WBGene00043156	protein_coding	222.63	264.052	284.914
pri-2	WBGene00004181	protein_coding	222.354	267.457	291.399
mtx-1	WBGene00009559	protein_coding	222.285	254.158	232.735
ubc-7	WBGene00006704	protein_coding	220.839	236.234	216.823
T08A11.2	WBGene00011605	protein_coding	220.426	187.728	232.375
R02F2.1	WBGene00019831	protein_coding	220.426	143.655	217.664
gcn-1	WBGene00021697	protein_coding	220.219	174.172	280.891
isp-1	WBGene00002162	protein_coding	220.15	194.795	212.68
F25G6.9	WBGene00017800	protein_coding	219.6	260.776	306.71
ech-1.2	WBGene00020347	protein_coding	219.393	194.024	298.004
fipp-1	WBGene00017988	protein_coding	219.118	247.798	189.502
sti-1	WBGene00019983	protein_coding	218.98	283.069	174.731
sars-1	WBGene00005663	protein_coding	218.36	196.915	250.748
lmn-1	WBGene00003052	protein_coding	218.291	212.848	238.199
pbs-1	WBGene00003947	protein_coding	218.085	211.756	198.029
F17C11.10	WBGene00008921	protein_coding	218.016	237.647	259.755
epc-1	WBGene00007030	protein_coding	217.878	245.485	236.878
rod-1	WBGene00018900	protein_coding	217.809	219.337	283.653
maph-1.2	WBGene00009113	protein_coding	217.121	203.018	253.27
gsp-4	WBGene00020187	protein_coding	217.121	16.19	71.033
nuo-1	WBGene00003831	protein_coding	216.776	217.795	233.335
pole-1	WBGene00009368	protein_coding	216.088	233.343	289.477
nfx-1	WBGene00007048	protein_coding	215.95	192.161	242.762
D1044.6	WBGene00017031	protein_coding	215.537	202.761	245.584
C49H3.3	WBGene00016790	protein_coding	215.055	338.321	255.252
msd-2	WBGene00009682	protein_coding	214.435	26.405	73.735
Y41E3.11	WBGene00012769	protein_coding	214.228	205.01	217.603
slc-17.2	WBGene00008000	protein_coding	214.16	218.63	244.143
msp-77	WBGene00003464	protein_coding	214.022	24.092	81.181
hsp-3	WBGene00002007	protein_coding	213.746	278.443	203.673
cogc-2	WBGene00000585	protein_coding	213.609	238.354	273.926
tag-30	WBGene00006415	protein_coding	212.851	240.859	257.353
cth-2	WBGene00022856	protein_coding	212.713	139.479	94.631
xpo-1	WBGene00002078	protein_coding	212.438	180.082	219.885
qars-1	WBGene00001336	protein_coding	212.231	210.021	228.772
smu-1	WBGene00004895	protein_coding	212.094	238.225	250.388
srgp-1	WBGene00006406	protein_coding	211.612	222.806	206.375
nos-3	WBGene00003785	protein_coding	211.474	187.792	250.748
M110.3	WBGene00010913	protein_coding	211.13	226.211	289.417
era-1	WBGene00020948	protein_coding	210.992	213.94	179.115
Y111B2A.10	WBGene00013734	protein_coding	210.854	199.806	220.966
eif-3.F	WBGene00001229	protein_coding	210.441	235.784	241.922
T02H6.11	WBGene00020181	protein_coding	210.028	224.669	237.719
D2023.6	WBGene00008410	protein_coding	209.89	244.65	257.834
rpb-2	WBGene00016140	protein_coding	208.926	205.267	253.991
puf-7	WBGene00004243	protein_coding	208.788	219.016	227.211
cdc-25.1	WBGene00000386	protein_coding	208.788	214.261	237.238
gen-1	WBGene00020442	protein_coding	208.719	230.58	216.102
T05B9.1	WBGene00011464	protein_coding	208.444	219.401	202.412
Y71H2AM.5	WBGene00022170	protein_coding	208.375	215.161	202.652
arf-1.2	WBGene00000182	protein_coding	208.237	185.029	216.222
pbrm-1	WBGene00007042	protein_coding	207.067	208.479	225.589
pas-4	WBGene00003925	protein_coding	206.929	219.851	192.985
F58B3.4	WBGene00010231	protein_coding	206.722	239.253	259.035
T23G11.1	WBGene00011968	protein_coding	206.24	13.427	79.26
F46F11.8	WBGene00018511	protein_coding	206.034	238.161	352.885
K04F10.3	WBGene00019396	protein_coding	205.896	271.312	286.535
usp-48	WBGene00009267	protein_coding	205.758	191.711	242.102
gld-1	WBGene00001595	protein_coding	205.483	167.747	186.92
mbk-2	WBGene00003150	protein_coding	205.276	202.44	186.86
deps-1	WBGene00022034	protein_coding	205.208	195.951	224.028
tofu-2	WBGene00017620	protein_coding	205.07	225.504	243.783
eif-3.B	WBGene00001225	protein_coding	205.07	171.345	233.335
K06H7.7	WBGene00019458	protein_coding	204.657	286.86	281.071
T19A6.1	WBGene00011827	protein_coding	204.588	297.075	264.439
inx-14	WBGene00002136	protein_coding	204.45	254.415	282.572
fars-3	WBGene00001498	protein_coding	204.243	183.359	223.848
nog-1	WBGene00020297	protein_coding	204.243	154.577	217.423
cdk-1	WBGene00000405	protein_coding	203.417	245.935	238.439
F19F10.12	WBGene00017608	protein_coding	203.279	203.211	244.864
cco-2	WBGene00012553	protein_coding	202.866	178.862	195.387
bub-1	WBGene00000275	protein_coding	202.797	187.149	234.356
cco-1	WBGene00000371	protein_coding	202.591	206.166	221.206
aipl-1	WBGene00010685	protein_coding	202.522	216.96	197.548
air-1	WBGene00000098	protein_coding	202.453	192.996	198.689
rskn-1	WBGene00011352	protein_coding	202.315	207.644	205.054
ppw-2	WBGene00004094	protein_coding	201.696	166.526	229.132
pir-1	WBGene00011967	protein_coding	201.627	233.214	257.654
mdt-26	WBGene00016115	protein_coding	201.558	210.728	223.668
cacn-1	WBGene00012230	protein_coding	201.42	242.979	206.615
mars-1	WBGene00003415	protein_coding	200.869	174.107	235.257
T04D3.5	WBGene00011434	protein_coding	200.663	243.558	247.446
mat-2	WBGene00003133	protein_coding	200.594	197.3	212.5
metr-1	WBGene00010988	protein_coding	200.318	169.996	189.082
bub-3	WBGene00013209	protein_coding	200.112	274.653	240.841
app-1	WBGene00000155	protein_coding	200.112	232.379	223.728
thoc-2	WBGene00015813	protein_coding	199.905	166.205	219.945
wnk-1	WBGene00006941	protein_coding	199.561	177.769	209.617
ZK1098.1	WBGene00014218	protein_coding	199.423	189.784	206.495
par-3	WBGene00003918	protein_coding	199.354	194.024	213.52
F54E12.2	WBGene00010061	protein_coding	199.148	199.806	223.728
adss-1	WBGene00016509	protein_coding	198.941	183.809	216.883
smc-4	WBGene00004874	protein_coding	198.872	196.465	234.776
tut-2	WBGene00009256	protein_coding	198.803	270.027	274.166
rgs-9	WBGene00004352	protein_coding	198.597	257.82	161.161
F32D8.5	WBGene00009330	protein_coding	198.459	209.122	230.813
dpf-3	WBGene00001056	protein_coding	198.39	196.915	211.419
mut-15	WBGene00011323	protein_coding	197.908	221.264	232.315
rpn-10	WBGene00004466	protein_coding	197.702	196.272	216.222
cyk-4	WBGene00000875	protein_coding	197.564	186.443	189.923
R10E9.2	WBGene00011214	protein_coding	197.495	17.925	64.789
C17F3.1	WBGene00015907	protein_coding	197.013	19.659	98.234
cht-3	WBGene00016084	protein_coding	196.944	279.15	250.268
dnj-12	WBGene00001030	protein_coding	196.875	209.379	187.101
hecd-1	WBGene00016405	protein_coding	196.875	177.127	252.73
czw-1	WBGene00017643	protein_coding	196.6	192.996	252.249
tag-124	WBGene00006473	protein_coding	196.531	202.183	209.377
hcp-4	WBGene00001832	protein_coding	196.393	171.281	206.075
snpc-3.4	WBGene00011367	protein_coding	196.187	253.709	233.335
ZK328.4	WBGene00022694	protein_coding	196.118	228.46	261.376
pigv-1	WBGene00020375	protein_coding	196.118	214.711	205.895
Y67H2A.5	WBGene00013463	protein_coding	196.118	181.11	241.682
pbs-6	WBGene00003952	protein_coding	196.118	165.627	162.782
F44G4.3	WBGene00009713	protein_coding	195.911	315.064	196.648
C05D11.1	WBGene00015481	protein_coding	195.773	177.705	250.868
dlat-1	WBGene00009082	protein_coding	195.705	171.216	207.036
imp-1	WBGene00007979	protein_coding	195.567	223.834	190.943
ufd-1	WBGene00006733	protein_coding	194.809	182.781	169.027
vars-2	WBGene00006936	protein_coding	194.809	177.898	263.838
kin-18	WBGene00002201	protein_coding	194.672	188.884	187.221
znf-622	WBGene00015809	protein_coding	194.534	188.242	250.328
hmg-1.1	WBGene00001971	protein_coding	194.396	194.602	205.895
rmd-3	WBGene00007190	protein_coding	194.396	19.274	79.68
rad-23	WBGene00013924	protein_coding	194.121	185.158	188.121
nspd-4	WBGene00020715	protein_coding	193.983	21.908	87.065
D1086.17	WBGene00045355	protein_coding	193.983	17.539	97.633
K07C5.6	WBGene00010629	protein_coding	193.914	195.437	212.68
cel-1	WBGene00000466	protein_coding	193.639	226.404	266.901
fbf-1	WBGene00001401	protein_coding	193.639	183.166	238.619
W03D8.9	WBGene00020990	protein_coding	193.57	16.254	73.916
phb-2	WBGene00004015	protein_coding	193.501	184.001	208.657
Y39G10AR.8	WBGene00021466	protein_coding	193.088	173.015	215.502
exos-8	WBGene00018305	protein_coding	192.675	221.007	247.446
F10D11.2	WBGene00008648	protein_coding	192.055	227.368	259.095
T22D1.3	WBGene00020682	protein_coding	192.055	164.214	268.101
Y57G11B.5	WBGene00013297	protein_coding	191.711	243.879	70.613
unc-54	WBGene00006789	protein_coding	191.297	122.261	112.464
cdc-5L	WBGene00008386	protein_coding	190.884	180.468	215.262
2001-09-01	WBGene00004775	protein_coding	190.471	180.082	197.608
vps-51	WBGene00015176	protein_coding	190.402	289.622	208.777
set-31	WBGene00007615	protein_coding	190.265	226.725	259.455
aka-1	WBGene00000101	protein_coding	190.127	187.792	204.874
F32B5.4	WBGene00017978	protein_coding	190.127	16.447	78.779
C35A5.8	WBGene00007952	protein_coding	189.989	175.842	217.423
pas-6	WBGene00003927	protein_coding	189.714	183.295	185.84
daz-1	WBGene00000935	protein_coding	189.645	182.395	191.364
C01G10.8	WBGene00007235	protein_coding	189.576	207.323	193.706
vps-20	WBGene00022027	protein_coding	189.163	231.158	225.83
pqe-1	WBGene00004095	protein_coding	188.818	186.057	182.237
rbpl-1	WBGene00009477	protein_coding	188.75	150.658	207.336
nspd-3	WBGene00016058	protein_coding	188.75	24.478	89.707
npp-8	WBGene00003794	protein_coding	188.681	185.415	213.22
cogc-8	WBGene00019820	protein_coding	188.474	213.747	232.915
trr-1	WBGene00007028	protein_coding	188.405	179.761	206.435
prg-2	WBGene00004179	protein_coding	187.923	239.574	337.333
F53F4.11	WBGene00009993	protein_coding	187.923	157.917	205.955
glp-1	WBGene00001609	protein_coding	187.579	182.01	183.258
F08G12.2	WBGene00008586	protein_coding	187.51	269.449	213.52
K07H8.2	WBGene00019504	protein_coding	187.235	220.108	188.962
B0495.2	WBGene00015203	protein_coding	187.028	245.1	250.568
Y22D7AL.10	WBGene00021248	protein_coding	187.028	236.619	218.624
T10E9.4	WBGene00020414	protein_coding	187.028	13.427	74.036
mes-6	WBGene00003224	protein_coding	186.753	262.318	259.455
imp-2	WBGene00011481	protein_coding	186.753	217.602	186.14
T21B10.3	WBGene00011885	protein_coding	186.753	187.406	203.253
pas-1	WBGene00003922	protein_coding	186.753	176.87	212.079
hcp-6	WBGene00001833	protein_coding	186.339	169.289	219.105
C05B5.2	WBGene00007320	protein_coding	186.339	13.813	100.275
mtch-1	WBGene00018395	protein_coding	186.271	164.984	218.924
F49C12.11	WBGene00009880	protein_coding	186.064	217.923	219.045
ran-3	WBGene00004304	protein_coding	186.064	166.912	179.955
gld-3	WBGene00001597	protein_coding	185.72	206.166	200.491
tofu-6	WBGene00017132	protein_coding	185.651	219.787	186.26
mdh-1	WBGene00018491	protein_coding	185.307	192.225	189.382
egg-3	WBGene00009701	protein_coding	185.1	204.496	187.041
smo-1	WBGene00004888	protein_coding	185.1	183.359	195.207
T05H10.1	WBGene00011507	protein_coding	184.756	190.94	236.097
C07D8.6	WBGene00015565	protein_coding	184.618	180.725	244.564
erfa-1	WBGene00020269	protein_coding	184.549	187.406	224.148
lex-1	WBGene00008682	protein_coding	183.998	172.566	198.569
daf-15	WBGene00000911	protein_coding	183.447	166.462	190.043
T13C2.6	WBGene00020481	protein_coding	183.241	196.272	201.992
unc-60	WBGene00006794	protein_coding	182.828	174.686	156.057
cpi-2	WBGene00000534	protein_coding	182.621	212.398	172.51
R11H6.2	WBGene00011250	protein_coding	182.621	205.203	187.821
yop-1	WBGene00022127	protein_coding	182.277	212.527	180.496
F56C9.10	WBGene00018953	protein_coding	182.277	172.116	198.689
gex-3	WBGene00001580	protein_coding	182.139	208.222	255.432
H06I04.3	WBGene00019168	protein_coding	182.001	118.92	165.304
npp-22	WBGene00007118	protein_coding	181.863	193.831	168.006
smc-5	WBGene00016151	protein_coding	181.795	198.714	226.01
C17G10.9	WBGene00015920	protein_coding	181.588	156.183	182.477
cope-1	WBGene00009732	protein_coding	181.45	207.13	179.415
col-20	WBGene00000609	protein_coding	181.313	12.335	36.327
cri-3	WBGene00010303	protein_coding	180.968	166.012	181.636
col-178	WBGene00000751	protein_coding	180.417	10.793	29.722
rpa-2	WBGene00019767	protein_coding	180.211	202.697	192.865
sup-17	WBGene00006324	protein_coding	180.142	203.404	212.74
C27F2.8	WBGene00016170	protein_coding	180.142	178.348	183.738
F59E12.9	WBGene00019124	protein_coding	180.004	164.663	192.385
xpo-2	WBGene00002079	protein_coding	179.866	168.582	201.752
Y102E9.2	WBGene00022420	protein_coding	179.798	172.887	192.144
pde-12	WBGene00011268	protein_coding	179.729	235.977	216.282
kin-19	WBGene00002202	protein_coding	179.04	163.957	188.362
abi-1	WBGene00015146	protein_coding	178.834	176.099	168.006
apc-2	WBGene00000143	protein_coding	178.765	226.661	237.178
Y47D3A.29	WBGene00012936	protein_coding	178.42	175.457	202.172
F49E8.7	WBGene00018638	protein_coding	178.352	200.577	254.591
T25G3.3	WBGene00012030	protein_coding	178.214	166.077	210.878
W07E11.1	WBGene00012326	protein_coding	177.938	148.666	250.808
top-1	WBGene00006595	protein_coding	177.732	185.993	174.431
ZK370.4	WBGene00022718	protein_coding	177.594	180.596	191.784
unc-15	WBGene00006754	protein_coding	177.387	105.942	104.779
C53H9.2	WBGene00016907	protein_coding	177.319	178.862	212.199
F31C3.3	WBGene00009285	protein_coding	176.837	163.443	174.731
atp-4	WBGene00020275	protein_coding	176.63	172.373	180.255
zer-1	WBGene00020762	protein_coding	176.63	162.929	183.378
ape-1	WBGene00000146	protein_coding	176.355	176.42	164.704
mesp-1	WBGene00016178	protein_coding	176.079	181.624	175.152
C44E4.4	WBGene00016653	protein_coding	176.079	157.082	167.226
C27H6.8	WBGene00007787	protein_coding	175.941	180.918	211.419
nmt-1	WBGene00020549	protein_coding	175.941	156.697	179.055
B0511.12	WBGene00015237	protein_coding	175.597	167.233	202.412
gln-2	WBGene00001603	protein_coding	175.528	16.126	57.343
F59A6.5	WBGene00019087	protein_coding	175.253	179.633	212.019
D2062.6	WBGene00017058	protein_coding	175.184	16.897	53.08
snf-5	WBGene00004904	protein_coding	174.977	16.447	54.821
T01C3.3	WBGene00011320	protein_coding	174.358	182.909	182.777
H29C22.1	WBGene00045261	protein_coding	174.289	291.421	86.765
nst-1	WBGene00003821	protein_coding	174.289	157.66	187.881
atx-2	WBGene00000231	protein_coding	173.944	166.077	214.061
ima-3	WBGene00002074	protein_coding	173.738	145.004	204.454
tag-18	WBGene00006408	protein_coding	173.669	185.094	105.019
plrg-1	WBGene00006481	protein_coding	173.118	170.06	150.173
pyp-1	WBGene00008149	protein_coding	173.118	166.976	181.516
col-93	WBGene00000668	protein_coding	172.98	10.022	31.344
Y67H2A.2	WBGene00013461	protein_coding	172.843	201.926	214.541
spk-1	WBGene00004980	protein_coding	172.774	151.364	173.29
ufd-2	WBGene00006734	protein_coding	172.429	162.736	198.809
T07A9.10	WBGene00020298	protein_coding	172.085	201.862	236.278
ztf-18	WBGene00020763	protein_coding	171.947	218.373	223.008
dnj-11	WBGene00001029	protein_coding	171.947	179.697	197.428
ddx-19	WBGene00011580	protein_coding	171.947	132.926	196.287
mdf-2	WBGene00003161	protein_coding	171.879	216.446	235.797
pyc-1	WBGene00004258	protein_coding	171.879	156.697	225.289
T26E3.4	WBGene00012037	protein_coding	171.81	207.066	218.144
eor-1	WBGene00001324	protein_coding	171.672	210.15	191.964
tlk-1	WBGene00006579	protein_coding	171.603	165.82	176.833
noca-1	WBGene00011647	protein_coding	171.534	159.267	178.934
dlst-1	WBGene00020950	protein_coding	171.328	145.197	177.794
F21D5.1	WBGene00009006	protein_coding	171.121	200.384	194.966
Y69E1A.1	WBGene00013473	protein_coding	171.121	11.95	45.574
T04A8.7	WBGene00011409	protein_coding	171.052	181.046	232.615
cogc-6	WBGene00019481	protein_coding	170.914	251.267	299.145
C33F10.11	WBGene00016357	protein_coding	170.914	9.83	115.046
lmd-3	WBGene00018700	protein_coding	170.295	153.227	183.198
T08B2.12	WBGene00020350	protein_coding	170.295	13.17	99.495
K10D2.5	WBGene00019631	protein_coding	170.019	245.742	241.261
ril-1	WBGene00008262	protein_coding	170.019	171.538	195.747
R148.4	WBGene00020103	protein_coding	169.95	209.764	224.569
piga-1	WBGene00008431	protein_coding	169.675	210.921	249.547
acer-1	WBGene00016630	protein_coding	169.606	158.303	238.619
wdr-20	WBGene00007428	protein_coding	169.468	181.046	163.563
msh-6	WBGene00003422	protein_coding	169.468	174.107	206.795
tac-1	WBGene00006381	protein_coding	169.124	234.756	189.983
F56C9.6	WBGene00018950	protein_coding	169.055	185.415	200.551
ZK616.5	WBGene00022775	protein_coding	168.917	167.619	205.414
C47E12.2	WBGene00008147	protein_coding	168.849	251.203	228.952
F02A9.4	WBGene00008514	protein_coding	168.849	159.202	190.523
F36A2.7	WBGene00009454	protein_coding	168.78	150.658	171.069
Y37E3.17	WBGene00021355	protein_coding	168.78	130.291	233.515
swsn-7	WBGene00007433	protein_coding	168.711	178.348	165.244
usip-1	WBGene00014124	protein_coding	168.711	172.758	192.204
F32A11.1	WBGene00009307	protein_coding	168.504	186.7	165.184
F57C2.4	WBGene00010196	protein_coding	168.298	202.761	157.919
cyb-2.1	WBGene00000866	protein_coding	168.229	186.314	194.546
ubr-1	WBGene00016326	protein_coding	168.229	147.509	194.186
lin-45	WBGene00003030	protein_coding	167.747	162.222	185.96
bli-4	WBGene00000254	protein_coding	167.678	161.644	151.674
C48E7.7	WBGene00016752	protein_coding	167.058	16.062	98.414
T07F12.2	WBGene00020322	protein_coding	166.852	202.954	220.786
K07A1.1	WBGene00010608	protein_coding	166.645	277.737	183.678
npp-1	WBGene00003787	protein_coding	166.438	255.379	207.756
W09C5.8	WBGene00012354	protein_coding	166.438	149.822	181.937
golg-2	WBGene00018017	protein_coding	166.232	172.18	228.292
eif-1	WBGene00020868	protein_coding	166.025	161.515	183.078
rig-4	WBGene00004371	protein_coding	165.819	179.247	175.092
tag-174	WBGene00006519	protein_coding	165.819	169.417	164.764
T11G6.5	WBGene00011720	protein_coding	165.474	155.54	201.812
col-80	WBGene00000656	protein_coding	165.337	8.93	34.526
W08F4.3	WBGene00021093	protein_coding	165.13	194.73	178.934
rfc-3	WBGene00004339	protein_coding	164.924	169.803	174.791
F52A8.5	WBGene00009918	protein_coding	164.717	216.767	174.671
abcf-3	WBGene00018339	protein_coding	164.717	133.504	187.341
dcaf-1	WBGene00014243	protein_coding	164.579	140.314	170.648
vps-33.2	WBGene00016960	protein_coding	164.373	199.292	186.92
tiar-1	WBGene00015943	protein_coding	164.373	154.769	159.78
hrp-2	WBGene00002000	protein_coding	164.235	134.853	157.859
F52B5.3	WBGene00009922	protein_coding	164.166	189.848	203.193
hmr-1	WBGene00001980	protein_coding	163.959	168.582	163.503
ulp-2	WBGene00006737	protein_coding	163.822	177.256	222.107
F10E9.5	WBGene00017357	protein_coding	163.753	270.798	186.98
gei-17	WBGene00001574	protein_coding	163.684	161.13	183.798
icp-1	WBGene00002047	protein_coding	163.615	169.867	177.373
T08B6.4	WBGene00020353	protein_coding	163.409	9.444	67.311
npp-6	WBGene00003792	protein_coding	163.34	155.99	185.479
ssp-19	WBGene00006047	protein_coding	163.271	11.95	37.828
Y47G6A.25	WBGene00021649	protein_coding	163.064	204.881	211.419
htz-1	WBGene00019947	protein_coding	162.927	157.66	164.103
JC8.2	WBGene00010435	protein_coding	162.927	140.956	184.999
C25H3.9	WBGene00016118	protein_coding	162.858	180.532	135.882
ani-3	WBGene00012835	protein_coding	162.789	171.795	201.692
cam-1	WBGene00000289	protein_coding	162.651	174.172	172.75
map-2	WBGene00003130	protein_coding	162.238	128.878	214.541
T03G11.6	WBGene00020199	protein_coding	162.169	217.024	196.408
gyg-2	WBGene00012020	protein_coding	162.169	180.147	162.362
ZK1307.4	WBGene00014247	protein_coding	162.169	17.668	89.467
T16A9.5	WBGene00011795	protein_coding	161.825	11.307	59.505
R05F9.6	WBGene00019890	protein_coding	161.48	171.923	164.043
mat-1	WBGene00003132	protein_coding	161.205	174.621	172.75
mdh-2	WBGene00003162	protein_coding	160.93	150.079	189.322
erm-1	WBGene00001333	protein_coding	160.861	139.543	232.675
rfc-4	WBGene00004340	protein_coding	159.828	182.01	141.887
nspa-8	WBGene00012294	protein_coding	159.69	12.721	59.505
zfp-2	WBGene00009448	protein_coding	159.415	181.624	191.604
catp-4	WBGene00007248	protein_coding	159.415	9.444	56.142
C14C11.2	WBGene00015766	protein_coding	159.346	192.996	166.445
F23B12.7	WBGene00009084	protein_coding	159.346	129.456	167.586
cpt-1	WBGene00012907	protein_coding	159.277	146.803	129.397
puf-12	WBGene00014165	protein_coding	159.277	132.604	170.108
col-119	WBGene00000693	protein_coding	159.277	16.062	47.436
F58G11.3	WBGene00010281	protein_coding	159.139	219.53	133.48
F22E5.17	WBGene00017712	protein_coding	159.07	200.256	173.35
cpb-3	WBGene00000772	protein_coding	158.451	133.889	173.891
mthf-1	WBGene00015512	protein_coding	158.244	127.336	173.891
F11E6.7	WBGene00008710	protein_coding	158.037	170.188	140.325
sdhb-1	WBGene00006433	protein_coding	157.968	139.543	161.161
lst-1	WBGene00003083	protein_coding	157.9	175.264	185.78
rde-10	WBGene00021634	protein_coding	157.9	160.487	250.688
Y45G5AM.2	WBGene00021555	protein_coding	157.693	187.599	224.329
erd-2	WBGene00001331	protein_coding	157.555	210.664	165.064
B0001.2	WBGene00007087	protein_coding	157.555	184.451	187.221
zbp-1	WBGene00010908	protein_coding	157.486	129.585	165.124
erfa-3	WBGene00010405	protein_coding	157.211	155.99	201.451
C37A2.8	WBGene00016494	protein_coding	157.073	172.501	216.703
npp-2	WBGene00003788	protein_coding	157.073	145.646	162.242
mog-5	WBGene00003393	protein_coding	156.729	145.903	158.159
skn-1	WBGene00004804	protein_coding	156.729	133.183	158.999
eif-1.A	WBGene00019162	protein_coding	156.591	165.948	163.083
rbg-3	WBGene00007167	protein_coding	156.591	144.618	215.922
clr-1	WBGene00000548	protein_coding	156.522	154.384	150.953
rpc-1	WBGene00004411	protein_coding	156.522	138.579	154.976
C44E4.1	WBGene00016650	protein_coding	155.971	142.049	183.258
spo-11	WBGene00004985	protein_coding	155.834	235.334	228.292
rpn-6.1	WBGene00004462	protein_coding	155.696	139.607	153.896
acdh-8	WBGene00019406	protein_coding	155.283	13.556	42.212
sir-2.1	WBGene00004800	protein_coding	155.145	192.546	174.731
fan-1	WBGene00015310	protein_coding	154.663	182.845	199.47
rnf-1	WBGene00004380	protein_coding	154.663	168.197	175.152
paqr-1	WBGene00016610	protein_coding	154.594	161.901	157.198
cyc-2.2	WBGene00013854	protein_coding	154.112	19.724	65.569
hpo-9	WBGene00015463	protein_coding	154.043	149.116	166.265
klp-18	WBGene00002228	protein_coding	154.043	145.132	181.216
rad-50	WBGene00004296	protein_coding	153.699	138.772	215.082
B0035.1	WBGene00007105	protein_coding	153.63	158.303	140.986
teg-4	WBGene00019323	protein_coding	153.561	140.571	165.905
snr-2	WBGene00004915	protein_coding	153.424	196.529	197.308
hmp-2	WBGene00001979	protein_coding	153.355	163.186	151.734
sao-1	WBGene00011195	protein_coding	153.355	154.577	167.946
frm-1	WBGene00001488	protein_coding	153.148	137.487	142.127
arf-3	WBGene00000183	protein_coding	152.942	179.697	151.914
crn-3	WBGene00000796	protein_coding	152.735	158.11	183.798
F58F12.1	WBGene00019061	protein_coding	151.84	137.359	147.951
dcr-1	WBGene00000939	protein_coding	151.702	143.205	160.741
Y54G9A.5	WBGene00013208	protein_coding	151.495	211.756	180.255
hip-1	WBGene00011735	protein_coding	151.22	138.065	178.874
mrg-1	WBGene00003406	protein_coding	151.013	163.186	146.93
Y71F9AL.9	WBGene00022114	protein_coding	151.013	148.987	163.143
T19A5.1	WBGene00020553	protein_coding	150.945	149.244	151.073
hum-2	WBGene00002036	protein_coding	150.876	135.752	178.694
bath-42	WBGene00016803	protein_coding	150.669	138.451	135.642
F33D11.10	WBGene00018007	protein_coding	150.6	175.392	179.655
neg-1	WBGene00017985	protein_coding	150.6	171.152	182.837
pck-2	WBGene00011232	protein_coding	150.531	152.521	141.827
2001-04-01	WBGene00000156	protein_coding	150.531	148.473	160.02
cyn-3	WBGene00000879	protein_coding	150.531	145.197	147.591
unc-71	WBGene00006804	protein_coding	150.256	179.183	124.834
idhg-1	WBGene00009440	protein_coding	150.256	121.811	174.071
K07A1.6	WBGene00010613	protein_coding	150.187	178.797	88.687
lap-1	WBGene00002249	protein_coding	150.049	147.381	183.498
rab-8	WBGene00004272	protein_coding	149.774	180.211	157.078
ppm-1	WBGene00006460	protein_coding	149.636	164.47	173.17
sel-11	WBGene00004768	protein_coding	149.636	158.046	169.748
sin-3	WBGene00004117	protein_coding	149.567	149.244	163.143
ect-2	WBGene00002297	protein_coding	149.43	133.118	146.63
abcf-1	WBGene00006512	protein_coding	149.361	130.741	183.318
ego-1	WBGene00001214	protein_coding	149.292	162.029	196.227
cchl-1	WBGene00011527	protein_coding	149.154	141.792	163.443
puf-8	WBGene00004244	protein_coding	149.085	147.06	174.851
sqd-1	WBGene00022235	protein_coding	148.948	154.384	160.26
perm-5	WBGene00016955	protein_coding	148.879	207.516	142.487
ntl-2	WBGene00003825	protein_coding	148.879	177.898	140.085
C05C10.2	WBGene00007329	protein_coding	148.81	157.596	169.447
smz-2	WBGene00020661	protein_coding	148.741	13.684	68.812
mlc-3	WBGene00003371	protein_coding	148.672	80.179	85.084
puf-6	WBGene00004242	protein_coding	148.466	156.568	155.757
attf-2	WBGene00017317	protein_coding	148.397	140.507	158.459
Y46E12BL.2	WBGene00021595	protein_coding	148.19	135.817	148.672
F44G4.2	WBGene00009712	protein_coding	148.052	164.535	166.685
wwp-1	WBGene00007009	protein_coding	148.052	155.926	157.799
R05H5.3	WBGene00011038	protein_coding	147.915	174.75	160.861
npp-14	WBGene00003800	protein_coding	147.639	148.859	184.519
Y53C10A.6	WBGene00013137	protein_coding	147.433	158.881	153.355
glh-4	WBGene00001601	protein_coding	147.364	144.426	199.53
T14G10.5	WBGene00011775	protein_coding	147.226	159.909	198.089
rpb-3	WBGene00007971	protein_coding	147.088	166.783	139.845
egl-30	WBGene00001196	protein_coding	147.088	135.945	128.737
alh-1	WBGene00000107	protein_coding	146.882	130.163	173.05
fzy-1	WBGene00001511	protein_coding	146.813	142.498	150.173
tufm-1	WBGene00007000	protein_coding	146.813	119.562	161.581
rpoa-2	WBGene00008781	protein_coding	146.813	119.241	138.644
C16A3.5	WBGene00015810	protein_coding	146.675	138.451	164.824
exoc-7	WBGene00016606	protein_coding	146.537	172.309	180.676
Y106G6A.4	WBGene00013696	protein_coding	146.537	18.31	61.246
ddx-23	WBGene00017162	protein_coding	146.469	155.476	164.283
pitr-1	WBGene00016739	protein_coding	146.4	125.601	158.579
ZK688.5	WBGene00022800	protein_coding	146.331	146.546	154.856
tag-151	WBGene00006497	protein_coding	146.331	112.495	153.115
F44E5.1	WBGene00009688	protein_coding	146.193	148.023	168.246
W04A4.5	WBGene00012234	protein_coding	146.124	162.093	168.607
gsr-1	WBGene00008117	protein_coding	146.124	155.99	172.87
D1054.3	WBGene00008371	protein_coding	146.055	182.267	191.844
mep-1	WBGene00003218	protein_coding	145.987	140.828	155.877
ucr-2.3	WBGene00020757	protein_coding	145.918	131.448	151.494
got-2.1	WBGene00016652	protein_coding	145.642	124.702	134.321
T19B10.8	WBGene00011835	protein_coding	145.229	168.582	174.371
rha-1	WBGene00004355	protein_coding	145.229	120.655	171.008
ZC376.6	WBGene00013877	protein_coding	145.023	184.708	186.44
T10E9.2	WBGene00020412	protein_coding	144.885	193.124	205.234
catp-8	WBGene00007514	protein_coding	144.54	167.876	149.933
copb-1	WBGene00021292	protein_coding	144.54	138.965	159.66
sel-10	WBGene00004767	protein_coding	144.472	143.076	148.311
dld-1	WBGene00010794	protein_coding	144.334	127.143	183.138
gls-1	WBGene00007975	protein_coding	144.196	138.836	175.452
nxt-1	WBGene00003836	protein_coding	143.921	150.401	192.385
ZK945.7	WBGene00014169	protein_coding	143.714	12.271	57.703
nxf-2	WBGene00003835	protein_coding	143.439	180.661	166.505
zen-4	WBGene00006974	protein_coding	143.439	141.599	166.385
tbg-1	WBGene00006540	protein_coding	143.439	137.744	150.413
ctr-9	WBGene00007184	protein_coding	143.026	127.914	160.621
agt-2	WBGene00000094	protein_coding	142.957	163.378	145.729
pccb-1	WBGene00018701	protein_coding	142.957	142.627	186.8
sqv-5	WBGene00005023	protein_coding	142.888	167.169	154.616
ife-3	WBGene00002061	protein_coding	142.819	144.169	144.709
smk-1	WBGene00018285	protein_coding	142.819	135.495	155.757
lsy-12	WBGene00045419	protein_coding	142.75	157.917	174.431
rme-8	WBGene00004378	protein_coding	142.612	158.817	181.757
gon-14	WBGene00002148	protein_coding	142.475	145.775	136.843
cux-7	WBGene00000854	protein_coding	142.13	174.621	169.507
let-363	WBGene00002583	protein_coding	142.13	133.954	177.493
T22C1.4	WBGene00011915	protein_coding	142.061	235.72	223.548
kin-4	WBGene00002192	protein_coding	141.855	141.856	156.538
tcc-1	WBGene00013340	protein_coding	141.717	145.325	164.584
lin-5	WBGene00002994	protein_coding	141.579	148.473	161.221
C36A4.4	WBGene00007965	protein_coding	141.235	156.632	166.145
ivd-1	WBGene00015326	protein_coding	141.235	128.428	155.577
his-37	WBGene00001911	protein_coding	141.166	163.828	185.299
hgrs-1	WBGene00004101	protein_coding	141.029	128.814	138.944
rpn-12	WBGene00004468	protein_coding	140.891	153.934	126.875
pcaf-1	WBGene00021636	protein_coding	140.822	174.107	176.413
aagr-3	WBGene00009583	protein_coding	140.822	164.214	160.26
dnj-16	WBGene00001034	protein_coding	140.684	187.471	149.933
ets-6	WBGene00017606	protein_coding	140.547	156.247	183.258
emc-1	WBGene00019209	protein_coding	140.409	143.783	167.406
klp-7	WBGene00002219	protein_coding	140.409	135.174	156.718
rin-1	WBGene00008183	protein_coding	140.202	115.386	151.314
fsn-1	WBGene00001499	protein_coding	140.064	139.414	143.508
mtr-4	WBGene00012342	protein_coding	140.064	114.744	150.533
haf-2	WBGene00001812	protein_coding	139.927	155.155	137.323
tat-3	WBGene00012360	protein_coding	139.927	139.093	157.318
T24D1.3	WBGene00011986	protein_coding	139.72	147.509	130.598
E01A2.2	WBGene00017085	protein_coding	139.651	147.252	136.062
gsy-1	WBGene00001793	protein_coding	139.445	152.264	137.263
sec-16	WBGene00013985	protein_coding	139.307	146.931	160.921
spr-2	WBGene00005007	protein_coding	139.238	155.026	159.059
rpt-6	WBGene00004506	protein_coding	139.238	123.353	132.099
ggtb-1	WBGene00015099	protein_coding	139.1	188.499	164.283
F35G2.1	WBGene00009435	protein_coding	139.1	127.208	136.242
sart-3	WBGene00007111	protein_coding	138.963	130.805	167.466
C27A7.5	WBGene00007756	protein_coding	138.894	143.012	100.816
D2062.7	WBGene00017059	protein_coding	138.825	9.765	60.946
F53C11.5	WBGene00009975	protein_coding	138.756	125.152	148.552
gck-1	WBGene00001526	protein_coding	138.687	131.962	151.314
zyg-1	WBGene00006988	protein_coding	138.618	190.747	144.408
scc-3	WBGene00004738	protein_coding	138.481	125.088	160.861
K01G5.9	WBGene00010480	protein_coding	138.412	141.984	131.259
smc-3	WBGene00004873	protein_coding	138.205	118.213	166.865
tofu-7	WBGene00022737	protein_coding	138.136	156.504	174.971
ZK973.1	WBGene00022830	protein_coding	138.136	136.009	159.54
kin-3	WBGene00002191	protein_coding	138.136	126.822	143.508
act-1	WBGene00000063	protein_coding	137.999	92.258	118.229
F49C12.15	WBGene00009884	protein_coding	137.999	15.676	55.602
egl-27	WBGene00001194	protein_coding	137.792	134.467	157.318
meg-1	WBGene00010492	protein_coding	137.792	118.406	140.506
cdl-1	WBGene00000411	protein_coding	137.654	121.747	143.748
larp-5	WBGene00004147	protein_coding	137.585	118.92	146.93
met-2	WBGene00019883	protein_coding	137.241	145.582	179.235
acly-1	WBGene00016995	protein_coding	137.103	131.833	169.748
iftb-1	WBGene00010560	protein_coding	136.966	139.543	144.529
fbf-2	WBGene00001402	protein_coding	136.897	125.858	176.893
vab-1	WBGene00006868	protein_coding	136.759	150.786	152.274
sod-2	WBGene00004931	protein_coding	136.69	176.42	175.332
F28B3.5	WBGene00017886	protein_coding	136.621	216.253	193.405
dct-16	WBGene00012615	protein_coding	136.621	139.543	29.963
B0218.7	WBGene00015051	protein_coding	136.553	8.866	66.23
cec-10	WBGene00022831	protein_coding	136.139	136.716	155.036
T04A8.8	WBGene00011410	protein_coding	136.07	177.256	150.413
ZK550.3	WBGene00013997	protein_coding	136.002	119.884	150.893
plk-2	WBGene00004043	protein_coding	135.864	112.046	125.795
F12F6.7	WBGene00008722	protein_coding	135.726	185.672	200.551
bath-41	WBGene00018137	protein_coding	135.52	136.588	156.297
pbs-2	WBGene00003948	protein_coding	135.382	139.029	131.859
F14E5.2	WBGene00008800	protein_coding	135.244	155.99	164.764
unc-40	WBGene00006776	protein_coding	135.244	130.227	126.155
nol-1	WBGene00021073	protein_coding	135.244	103.565	112.344
elpc-1	WBGene00022463	protein_coding	135.106	132.733	148.492
vps-25	WBGene00012193	protein_coding	135.038	178.926	171.789
B0303.3	WBGene00015125	protein_coding	135.038	90.973	138.884
C45G9.2	WBGene00016674	protein_coding	134.969	174.621	152.935
phb-1	WBGene00004014	protein_coding	134.969	131.191	138.344
T20B12.7	WBGene00020604	protein_coding	134.831	158.046	157.859
Y75B8A.24	WBGene00013557	protein_coding	134.831	143.269	168.847
F52H3.6	WBGene00009948	protein_coding	134.831	11.307	60.586
byn-1	WBGene00000276	protein_coding	134.487	120.912	152.394
ent-1	WBGene00001320	protein_coding	134.005	116.928	143.868
B0511.6	WBGene00015232	protein_coding	133.867	124.766	139.125
F37A4.1	WBGene00018131	protein_coding	133.591	148.73	152.695
C01B10.8	WBGene00015282	protein_coding	133.591	118.856	156.658
ZK1128.1	WBGene00014227	protein_coding	133.523	180.339	187.521
K02C4.3	WBGene00010502	protein_coding	133.523	138.965	140.385
hpo-3	WBGene00018006	protein_coding	133.385	155.091	150.833
ceh-92	WBGene00013431	protein_coding	133.178	126.951	202.412
mdt-18	WBGene00007018	protein_coding	133.109	212.591	141.827
ZK686.3	WBGene00022793	protein_coding	133.109	140.121	142.427
let-502	WBGene00002694	protein_coding	133.109	125.923	177.613
emb-4	WBGene00001258	protein_coding	133.109	122.389	143.148
F33H1.4	WBGene00009365	protein_coding	132.903	164.214	138.404
ztf-23	WBGene00021846	protein_coding	132.765	145.903	169.627
pgam-5	WBGene00019941	protein_coding	132.627	127.593	146.15
lsy-27	WBGene00009834	protein_coding	132.559	143.076	151.314
cgt-3	WBGene00019127	protein_coding	132.559	130.227	143.748
F08F8.9	WBGene00017274	protein_coding	132.421	130.805	148.672
Y75B12B.1	WBGene00013567	protein_coding	132.352	122.389	125.855
jmjd-1.2	WBGene00017920	protein_coding	132.214	122.582	154.916
C56G2.7	WBGene00016981	protein_coding	132.214	111.21	129.757
sac-1	WBGene00009264	protein_coding	132.008	132.99	138.524
sec-31	WBGene00011338	protein_coding	131.801	127.529	137.143
rpoa-1	WBGene00012999	protein_coding	131.801	107.099	135.162
F34D10.8	WBGene00009377	protein_coding	131.801	10.536	66.23
Y38E10A.17	WBGene00012595	protein_coding	131.594	10.344	48.456
fars-1	WBGene00001497	protein_coding	131.526	125.088	141.046
F59E12.1	WBGene00019118	protein_coding	131.457	134.403	146.87
klc-1	WBGene00002214	protein_coding	131.388	156.118	163.203
C06H2.7	WBGene00007391	protein_coding	131.319	212.784	148.912
syp-2	WBGene00006376	protein_coding	131.319	146.417	178.334
F42A10.5	WBGene00018341	protein_coding	131.181	131.769	119.43
ssp-9	WBGene00006038	protein_coding	131.112	16.833	36.567
T28D9.1	WBGene00020894	protein_coding	131.044	117.828	137.323
npp-11	WBGene00003797	protein_coding	130.906	123.417	121.351
ZK643.2	WBGene00014034	protein_coding	130.699	169.353	145.91
rpn-11	WBGene00004467	protein_coding	130.493	143.269	142.367
elo-1	WBGene00001239	protein_coding	130.355	132.926	124.954
viln-1	WBGene00015691	protein_coding	130.011	136.652	146.51
wee-1.3	WBGene00006940	protein_coding	129.942	111.275	124.894
Y53C12B.2	WBGene00013144	protein_coding	129.873	132.733	162.662
sec-24.1	WBGene00004755	protein_coding	129.735	122.132	146.09
sec-23	WBGene00004754	protein_coding	129.735	110.247	144.889
sgt-1	WBGene00019893	protein_coding	129.666	123.417	135.522
T24H7.2	WBGene00020781	protein_coding	129.598	128.878	139.425
C05C12.5	WBGene00007337	protein_coding	129.598	9.38	70.553
asg-1	WBGene00000209	protein_coding	129.529	149.887	152.034
hmg-4	WBGene00001974	protein_coding	129.529	133.697	117.688
mdf-1	WBGene00003160	protein_coding	129.322	136.395	150.053
C50E3.13	WBGene00016824	protein_coding	129.253	183.038	127.055
sun-1	WBGene00006311	protein_coding	129.253	134.981	133.48
B0261.7	WBGene00015095	protein_coding	129.253	134.724	143.928
F12F6.1	WBGene00008720	protein_coding	129.184	131.705	136.182
W05F2.6	WBGene00021038	protein_coding	129.115	113.523	145.069
Y66D12A.10	WBGene00013436	protein_coding	129.047	137.166	145.009
C53B4.4	WBGene00008274	protein_coding	129.047	132.733	131.199
B0035.6	WBGene00007109	protein_coding	129.047	114.101	130.118
T24D1.2	WBGene00011985	protein_coding	128.909	125.345	144.709
ptc-1	WBGene00004208	protein_coding	128.84	157.596	117.388
cdk-5	WBGene00000407	protein_coding	128.771	133.568	159.66
F22G12.5	WBGene00009065	protein_coding	128.633	124.574	151.974
knl-1	WBGene00002231	protein_coding	128.565	124.509	151.614
sur-6	WBGene00006352	protein_coding	128.358	145.582	138.044
mut-16	WBGene00003508	protein_coding	128.358	117.828	115.227
col-81	WBGene00000657	protein_coding	128.22	1.221	4.804
xpb-1	WBGene00013441	protein_coding	127.876	142.627	151.374
perm-3	WBGene00022776	protein_coding	127.601	135.174	115.887
Y59E9AL.2	WBGene00043743	protein_coding	127.601	14.777	44.313
T26A8.1	WBGene00020824	protein_coding	127.463	146.931	121.471
mrp-7	WBGene00003413	protein_coding	127.325	149.887	138.284
hpo-19	WBGene00020268	protein_coding	127.256	145.775	156.297
suf-1	WBGene00006307	protein_coding	127.187	130.484	139.725
F10C2.4	WBGene00008645	protein_coding	127.05	132.797	157.018
micu-1	WBGene00013462	protein_coding	126.981	142.819	174.011
bmk-1	WBGene00000257	protein_coding	126.981	122.068	126.335
cey-1	WBGene00000472	protein_coding	126.843	123.546	123.933
npp-15	WBGene00003801	protein_coding	126.705	154.898	189.022
W09C5.1	WBGene00012351	protein_coding	126.705	142.049	111.744
C50F2.3	WBGene00016837	protein_coding	126.705	118.213	126.035
pqn-85	WBGene00004166	protein_coding	126.568	117.442	147.471
C34C12.2	WBGene00007921	protein_coding	126.43	155.155	150.653
mig-5	WBGene00003241	protein_coding	126.223	122.196	123.933
fat-1	WBGene00001393	protein_coding	126.086	127.786	127.356
F57C9.4	WBGene00019011	protein_coding	125.948	146.353	140.806
F13B12.1	WBGene00008729	protein_coding	125.948	130.741	117.688
Y54H5A.1	WBGene00021899	protein_coding	125.879	121.49	149.392
vps-39	WBGene00011625	protein_coding	125.81	127.914	152.635
F25H8.2	WBGene00009132	protein_coding	125.466	140.378	161.882
usp-5	WBGene00020839	protein_coding	125.397	113.909	139.365
let-711	WBGene00002845	protein_coding	125.259	118.599	174.311
mel-26	WBGene00003209	protein_coding	125.122	147.06	141.887
gad-1	WBGene00001513	protein_coding	125.122	127.079	131.259
rrf-3	WBGene00004510	protein_coding	125.053	156.954	166.385
K09E4.1	WBGene00010719	protein_coding	124.984	12.657	37.408
dhs-22	WBGene00000985	protein_coding	124.777	147.445	153.415
chn-1	WBGene00000500	protein_coding	124.639	200.448	151.554
F10C5.2	WBGene00017328	protein_coding	124.502	142.755	134.741
Y48B6A.1	WBGene00012978	protein_coding	124.502	107.484	134.381
ipla-3	WBGene00012319	protein_coding	124.364	123.995	155.817
let-754	WBGene00002879	protein_coding	124.364	82.043	96.312
div-1	WBGene00001002	protein_coding	124.295	138.579	141.226
exo-1	WBGene00009731	protein_coding	124.157	149.887	144.769
ben-1	WBGene00000248	protein_coding	124.157	27.883	50.378
pms-2	WBGene00004064	protein_coding	124.089	142.563	156.177
hda-1	WBGene00001834	protein_coding	124.089	127.914	127.836
mca-3	WBGene00003153	protein_coding	124.089	126.115	135.702
W09D6.4	WBGene00012357	protein_coding	123.951	10.601	62.747
mans-4	WBGene00013881	protein_coding	123.882	165.241	159.42
cyn-5	WBGene00000881	protein_coding	123.882	139.286	140.085
ogt-1	WBGene00003858	protein_coding	123.744	119.048	148.131
hoe-1	WBGene00001983	protein_coding	123.675	111.66	134.261
catp-6	WBGene00012341	protein_coding	123.607	120.719	127.115
rnp-8	WBGene00020091	protein_coding	123.469	106.456	140.085
C29A12.1	WBGene00007797	protein_coding	123.331	162.286	156.117
crml-1	WBGene00010641	protein_coding	123.331	126.565	127.115
B0491.5	WBGene00007192	protein_coding	123.331	123.803	132.82
dnj-19	WBGene00001037	protein_coding	123.331	120.269	121.111
K08C9.2	WBGene00010651	protein_coding	123.331	8.673	57.823
hyls-1	WBGene00015466	protein_coding	123.262	172.244	152.995
vha-18	WBGene00018698	protein_coding	123.262	165.948	170.828
ipgm-1	WBGene00019001	protein_coding	123.056	137.423	161.221
xnp-1	WBGene00006961	protein_coding	122.987	120.976	153.595
K08F9.4	WBGene00010687	protein_coding	122.711	134.789	132.64
set-16	WBGene00011729	protein_coding	122.642	132.347	154.256
dis-3	WBGene00001001	protein_coding	122.574	111.532	126.815
vha-12	WBGene00006921	protein_coding	122.436	121.104	118.289
C16A3.6	WBGene00015811	protein_coding	122.229	118.277	155.997
cid-1	WBGene00019629	protein_coding	122.16	110.953	156.718
F54B3.1	WBGene00010013	protein_coding	122.023	126.051	166.625
C37C3.2	WBGene00016496	protein_coding	121.954	103.051	105.98
ile-1	WBGene00002070	protein_coding	121.678	122.325	124.834
let-92	WBGene00002363	protein_coding	121.61	114.423	128.677
Y57G11C.9	WBGene00013307	protein_coding	121.334	138.001	127.656
met-1	WBGene00016603	protein_coding	121.334	109.09	119.009
ZK418.9	WBGene00022738	protein_coding	120.99	107.291	137.023
farl-11	WBGene00017349	protein_coding	120.921	121.168	154.076
Y53F4B.9	WBGene00013156	protein_coding	120.852	121.297	120.811
C01G6.5	WBGene00007227	protein_coding	120.852	114.744	114.026
mma-1	WBGene00007587	protein_coding	120.714	108.383	133.961
T14B4.3	WBGene00020500	protein_coding	120.646	197.043	160.981
clec-73	WBGene00021579	protein_coding	120.646	8.095	63.468
Y48G1A.2	WBGene00021658	protein_coding	120.577	173.915	146.51
trpp-6	WBGene00010699	protein_coding	120.508	232.25	154.616
ced-7	WBGene00000421	protein_coding	120.508	112.431	123.633
dab-1	WBGene00000894	protein_coding	120.301	120.205	123.993
nduo-2	WBGene00010961	protein_coding	120.095	171.923	75.957
C25A1.16	WBGene00077526	protein_coding	120.095	138.13	119.37
R12C12.5	WBGene00020025	protein_coding	120.026	166.655	140.566
rsp-6	WBGene00004703	protein_coding	120.026	123.096	102.917
atf-7	WBGene00000223	protein_coding	120.026	111.146	118.109
F19B6.1	WBGene00008948	protein_coding	119.957	113.202	127.776
F45H10.2	WBGene00009739	protein_coding	119.888	126.18	137.743
egg-5	WBGene00020035	protein_coding	119.819	127.336	113.125
trcs-2	WBGene00011312	protein_coding	119.613	112.174	117.688
lgg-1	WBGene00002980	protein_coding	119.544	139.093	157.378
F27D4.1	WBGene00009187	protein_coding	119.475	126.372	161.461
D1069.3	WBGene00017037	protein_coding	119.406	164.021	144.408
syx-16	WBGene00022534	protein_coding	119.406	152.521	168.427
F14H3.6	WBGene00008825	protein_coding	119.337	129.649	118.049
Y54E5A.7	WBGene00013202	protein_coding	119.337	114.487	134.141
R04F11.2	WBGene00011015	protein_coding	119.131	120.205	130.598
samp-1	WBGene00011994	protein_coding	119.062	116.093	141.466
pyr-1	WBGene00004259	protein_coding	119.062	107.741	170.648
T03F6.3	WBGene00011399	protein_coding	118.924	182.01	104.779
cnx-1	WBGene00000567	protein_coding	118.786	131.833	139.905
nuo-2	WBGene00020417	protein_coding	118.649	121.168	126.755
emb-9	WBGene00001263	protein_coding	118.58	87.76	95.952
bcs-1	WBGene00010042	protein_coding	118.511	133.889	140.325
mei-1	WBGene00003183	protein_coding	118.511	124.381	114.506
T23D8.3	WBGene00011944	protein_coding	118.373	122.132	146.51
K07A12.1	WBGene00010620	protein_coding	118.304	114.615	140.926
T25G3.4	WBGene00012031	protein_coding	118.235	115.9	121.711
atl-1	WBGene00000226	protein_coding	118.235	109.925	164.343
let-721	WBGene00002855	protein_coding	117.96	120.398	139.845
C27C7.1	WBGene00007766	protein_coding	117.96	58.978	153.535
K05C4.5	WBGene00010582	protein_coding	117.891	118.856	134.561
K11D12.13	WBGene00044535	protein_coding	117.616	141.792	81.301
ard-1	WBGene00000181	protein_coding	117.547	119.177	131.799
T16G12.8	WBGene00011809	protein_coding	117.478	212.976	132.52
perm-1	WBGene00011350	protein_coding	117.34	123.096	127.476
col-181	WBGene00000754	protein_coding	117.34	8.288	10.088
pup-2	WBGene00019628	protein_coding	117.134	117.057	134.441
rbx-2	WBGene00019993	protein_coding	117.065	138.322	161.101
D1043.1	WBGene00008361	protein_coding	116.996	105.364	126.515
F44E7.5	WBGene00018427	protein_coding	116.927	132.99	108.261
pas-7	WBGene00003928	protein_coding	116.72	129.328	109.222
col-143	WBGene00000716	protein_coding	116.72	17.154	44.614
mrps-30	WBGene00044321	protein_coding	116.652	119.241	140.626
cyld-1	WBGene00009594	protein_coding	116.652	111.853	114.206
T02G5.7	WBGene00020166	protein_coding	116.583	142.049	129.457
klp-12	WBGene00002223	protein_coding	116.583	111.018	134.501
Y48G1C.1	WBGene00021676	protein_coding	116.514	121.554	128.797
mtm-3	WBGene00003476	protein_coding	116.445	119.177	110.663
C55A6.1	WBGene00008330	protein_coding	116.307	138.194	120.811
gla-3	WBGene00011376	protein_coding	116.238	108.062	112.945
alh-8	WBGene00000114	protein_coding	116.238	93.864	140.986
vit-2	WBGene00006926	protein_coding	116.169	483.646	255.492
F32H2.7	WBGene00009344	protein_coding	116.101	9.958	41.011
Y75B8A.18	WBGene00013553	protein_coding	116.032	217.923	123.213
mog-1	WBGene00003389	protein_coding	115.963	113.33	111.384
snr-3	WBGene00004916	protein_coding	115.894	124.702	122.972
xnd-1	WBGene00001514	protein_coding	115.756	111.917	113.665
F32A7.4	WBGene00009305	protein_coding	115.687	136.588	146.21
sel-2	WBGene00004760	protein_coding	115.687	108.062	132.52
F44E2.8	WBGene00018421	protein_coding	115.687	102.73	135.462
C47D12.2	WBGene00008136	protein_coding	115.687	99.903	111.264
hsp-6	WBGene00002010	protein_coding	115.55	102.023	123.393
Y106G6H.6	WBGene00013719	protein_coding	115.205	157.403	113.605
egl-4	WBGene00001173	protein_coding	115.137	113.009	108.622
F46B6.5	WBGene00009770	protein_coding	114.999	111.467	129.397
C36E8.1	WBGene00007980	protein_coding	114.999	93.928	113.065
Y38E10A.14	WBGene00012592	protein_coding	114.999	40.861	64.909
mec-15	WBGene00003177	protein_coding	114.93	136.716	133.42
prpf-4	WBGene00004186	protein_coding	114.861	135.752	127.956
picc-1	WBGene00017931	protein_coding	114.861	119.37	109.823
ncl-1	WBGene00003559	protein_coding	114.655	133.183	123.453
xpo-3	WBGene00002080	protein_coding	114.655	112.303	128.677
F32B6.4	WBGene00009321	protein_coding	114.586	9.765	34.046
C05C10.7	WBGene00007334	protein_coding	114.448	163.314	145.069
jhdm-1	WBGene00020821	protein_coding	114.241	119.177	140.446
Y67H2A.10	WBGene00013465	protein_coding	114.241	99.068	114.146
R07H5.8	WBGene00011128	protein_coding	114.173	100.224	136.723
let-767	WBGene00002891	protein_coding	114.104	104.721	112.705
sax-2	WBGene00004728	protein_coding	114.104	72.663	192.505
let-99	WBGene00002368	protein_coding	114.035	110.761	127.115
C50F4.6	WBGene00001910	protein_coding	113.966	162.286	161.521
T25B9.9	WBGene00012015	protein_coding	113.966	118.599	123.213
lin-40	WBGene00003025	protein_coding	113.966	102.28	126.635
pxf-1	WBGene00004254	protein_coding	113.966	98.554	118.229
pie-1	WBGene00004027	protein_coding	113.759	106.328	111.744
use-1	WBGene00022460	protein_coding	113.622	138.065	129.217
rde-4	WBGene00004326	protein_coding	113.622	134.981	120.33
enu-3.2	WBGene00008003	protein_coding	113.553	121.233	150.833
pad-1	WBGene00003905	protein_coding	113.553	100.545	129.157
tam-1	WBGene00006523	protein_coding	113.346	114.615	97.874
tag-184	WBGene00007050	protein_coding	113.208	90.716	122.192
odr-8	WBGene00018160	protein_coding	113.14	107.805	140.566
csn-2	WBGene00000814	protein_coding	113.071	167.49	125.614
M18.6	WBGene00010891	protein_coding	113.071	127.465	162.362
C26B2.7	WBGene00016129	protein_coding	112.933	190.94	148.432
suco-1	WBGene00020031	protein_coding	112.658	108.64	107.421
cul-2	WBGene00000837	protein_coding	112.52	113.202	118.109
obr-4	WBGene00016331	protein_coding	112.52	112.303	106.7
cbp-1	WBGene00000366	protein_coding	112.52	97.397	107.241
vha-7	WBGene00006916	protein_coding	112.382	122.068	118.949
rab-1	WBGene00004266	protein_coding	112.382	114.68	113.966
F55F8.3	WBGene00018891	protein_coding	112.038	114.358	136.302
Y61A9LA.10	WBGene00022021	protein_coding	112.038	91.936	110.363
hrpf-2	WBGene00022253	protein_coding	111.831	109.09	110.783
H04M03.3	WBGene00019153	protein_coding	111.693	144.297	109.702
W03F9.10	WBGene00021004	protein_coding	111.487	99.967	115.106
dpt-1	WBGene00008532	protein_coding	111.487	93.607	125.194
gpcp-2	WBGene00011511	protein_coding	111.487	89.688	119.91
ZK809.3	WBGene00014086	protein_coding	111.143	113.33	122.672
cpn-1	WBGene00000777	protein_coding	111.074	124.638	131.379
lig-1	WBGene00002985	protein_coding	111.005	120.076	120.15
aly-2	WBGene00000121	protein_coding	111.005	106.263	117.148
pro-2	WBGene00007413	protein_coding	111.005	96.112	131.259
ubc-25	WBGene00006720	protein_coding	110.936	115.708	131.679
F56E10.1	WBGene00018975	protein_coding	110.867	109.219	131.078
wago-2	WBGene00018862	protein_coding	110.592	105.814	152.815
leo-1	WBGene00007110	protein_coding	110.454	122.646	130.898
msh-2	WBGene00003418	protein_coding	110.385	107.677	115.467
rgr-1	WBGene00004343	protein_coding	110.385	100.802	112.284
rop-1	WBGene00004405	protein_coding	110.316	103.372	128.917
K10B2.4	WBGene00019607	protein_coding	110.179	142.434	106.88
rpb-5	WBGene00019246	protein_coding	110.11	96.369	110.243
F40F8.11	WBGene00044916	protein_coding	110.041	97.012	104.418
F13H8.2	WBGene00017435	protein_coding	109.972	97.269	114.326
F58B3.6	WBGene00010232	protein_coding	109.765	123.803	114.086
R07E5.15	WBGene00011120	protein_coding	109.697	9.573	32.304
T11G6.8	WBGene00011722	protein_coding	109.628	113.78	131.739
capg-1	WBGene00009254	protein_coding	109.628	113.073	130.118
F10E7.5	WBGene00017347	protein_coding	109.559	118.47	129.577
dpy-26	WBGene00001085	protein_coding	109.49	97.526	116.608
Y54E10BR.5	WBGene00021844	protein_coding	109.421	135.431	142.247
R06C1.4	WBGene00011059	protein_coding	109.352	82.749	117.148
stam-1	WBGene00004109	protein_coding	109.283	106.135	113.846
edc-3	WBGene00011036	protein_coding	109.283	105.171	121.351
morc-1	WBGene00022531	protein_coding	109.146	121.233	134.741
rsp-1	WBGene00004698	protein_coding	109.077	103.372	95.952
R02D3.1	WBGene00019819	protein_coding	109.008	125.023	69.772
ZK858.6	WBGene00014119	protein_coding	108.939	102.601	112.705
akap-1	WBGene00016977	protein_coding	108.939	98.04	105.439
Y106G6H.13	WBGene00013723	protein_coding	108.939	8.93	49.958
cyp-31A2	WBGene00010354	protein_coding	108.87	132.926	132.099
vit-6	WBGene00006930	protein_coding	108.526	516.861	266.72
acdh-3	WBGene00019433	protein_coding	108.526	120.976	127.416
tbc-2	WBGene00022880	protein_coding	108.457	104.079	122.912
W06B4.1	WBGene00021056	protein_coding	108.388	127.143	134.501
htp-3	WBGene00002034	protein_coding	108.388	104.85	117.748
Y105E8A.25	WBGene00013682	protein_coding	108.25	99.325	154.076
zif-1	WBGene00006977	protein_coding	108.113	103.694	101.596
F40F8.1	WBGene00009575	protein_coding	107.975	123.995	126.155
hars-1	WBGene00002001	protein_coding	107.975	109.99	122.372
drp-1	WBGene00001093	protein_coding	107.975	96.434	115.347
his-74	WBGene00012276	protein_coding	107.906	115.129	135.582
cls-2	WBGene00000549	protein_coding	107.906	96.626	119.85
M03F8.3	WBGene00019762	protein_coding	107.906	92.579	115.347
C18F10.7	WBGene00015978	protein_coding	107.837	104.464	114.866
hpo-40	WBGene00014113	protein_coding	107.768	88.082	126.395
Y55F3AM.9	WBGene00021926	protein_coding	107.7	132.155	144.048
adsl-1	WBGene00011064	protein_coding	107.7	92.579	105.86
hrdl-1	WBGene00009164	protein_coding	107.631	114.551	127.115
B0464.6	WBGene00007186	protein_coding	107.562	105.364	116.427
vrk-1	WBGene00017895	protein_coding	107.424	106.328	118.229
fbxa-215	WBGene00012879	protein_coding	107.355	114.872	118.589
T08G11.4	WBGene00011631	protein_coding	107.355	100.802	132.339
larp-1	WBGene00020097	protein_coding	107.355	84.098	118.589
pash-1	WBGene00011908	protein_coding	107.286	126.565	123.032
lin-9	WBGene00002998	protein_coding	107.286	113.523	121.351
F35G12.12	WBGene00009445	protein_coding	107.286	106.199	124.113
[truncated: 13,190 more rows]
